# Supplementary material for: Image and data mining in reticular chemistry powered by GPT-4V
Source: Royal Society of Chemistry journal article supplement (doi:10.1039/d3dd00239j), 2024-01-01
Supplement: d3dd00239j2.zip [file SI-Image-Data Set.xlsx]

## Sheet: page-labels
			1	2	3	4	5	6				1	2	3	4	5	6
DOI	Section	Page	Nitrogen Isotherm	PXRD Pattern	TGA Curve	Crystal Structure or Topology	Other Sorption isotherm	None of above	GPT4V Output	Ground Truth*	Output Choices*	Choice 1 Evaluation	Choice 2 Evaluation	Choice 3 Evaluation	Choice 4 Evaluation	Choice 5 Evaluation	Choice 6 Evaluation
10.1016/j.ica.2016.05.002	Supporting Information	1	0	0	0	0	0	1	Figures: [Answer: (6) It does not have figures or have figures than not belong to above class] Nitrogen Isotherm: No	6	6	TN	TN	TN	TN	TN	TP
10.1016/j.ica.2016.05.002	Supporting Information	2	0	0	0	0	0	1	Figures: (6) It does not have figures or have figures than not belong to above class Nitrogen Isotherm: No	6	6	TN	TN	TN	TN	TN	TP
10.1016/j.ica.2016.05.002	Supporting Information	3	0	1	0	0	0	0	Figures: (2) Nitrogen Isotherm: No	2	2	TN	TP	TN	TN	TN	TN
10.1016/j.ica.2016.05.002	Supporting Information	4	0	1	0	0	0	0	Figures: (2);(2) Nitrogen Isotherm: No	2	2	TN	TP	TN	TN	TN	TN
10.1016/j.ica.2016.05.002	Supporting Information	5	0	1	0	0	0	0	Figures: (2) Nitrogen Isotherm: No	2	2	TN	TP	TN	TN	TN	TN
10.1016/j.ica.2016.05.002	Supporting Information	6	0	1	0	0	0	0	Figures: (2) Nitrogen Isotherm: No	2	2	TN	TP	TN	TN	TN	TN
10.1016/j.ica.2016.05.002	Main	1	0	0	0	0	0	1	Figures: (6) It does not have figures or have figures than not belong to above class Nitrogen Isotherm: No	6	6	TN	TN	TN	TN	TN	TP
10.1016/j.ica.2016.05.002	Main	2	0	0	0	0	0	1	Figures: (6) It does not have figures or have figures than not belong to above class Nitrogen Isotherm: No	6	6	TN	TN	TN	TN	TN	TP
10.1016/j.ica.2016.05.002	Main	3	0	0	0	0	0	1	Figures: (6) It does not have figures or have figures than not belong to above class Nitrogen Isotherm: No	6	6	TN	TN	TN	TN	TN	TP
10.1016/j.ica.2016.05.002	Main	4	0	0	0	1	0	0	Figures: (4) Nitrogen Isotherm: No	4	4	TN	TN	TN	TP	TN	TN
10.1016/j.ica.2016.05.002	Main	5	0	0	0	1	0	0	Figures: (4) Nitrogen Isotherm: No	4	4	TN	TN	TN	TP	TN	TN
10.1016/j.ica.2016.05.002	Main	6	0	0	0	1	0	0	Figures: (4) Crystal structure or topology illustration Nitrogen Isotherm: No	4	4	TN	TN	TN	TP	TN	TN
10.1016/j.ica.2016.05.002	Main	7	0	0	0	1	0	0	Figures: (4) Nitrogen Isotherm: No	4	4	TN	TN	TN	TP	TN	TN
10.1016/j.ica.2016.05.002	Main	8	0	0	0	1	0	0	Figures: (4) Crystal structure or topology illustration Nitrogen Isotherm: No	4	4	TN	TN	TN	TP	TN	TN
10.1016/j.ica.2016.05.002	Main	9	0	0	1	1	0	0	Figures: (4);(3) Nitrogen Isotherm: Fig. 7 Compound: N/A Porosity: N/A Saturation: 80-100 cm^3/g Position: (0,0.6,1,1)	34	34	TN	TN	TP	TP	TN	TN
10.1016/j.ica.2016.05.002	Main	10	0	0	0	0	0	1	Figures: (2);(6) Nitrogen Isotherm: No	6	26	TN	FP	TN	TN	TN	FN
10.1016/j.ica.2016.05.002	Main	11	0	0	0	0	0	1	Figures: (6) It does not have figures or have figures than not belong to above class Nitrogen Isotherm: No	6	6	TN	TN	TN	TN	TN	TP
10.1016/j.ica.2016.08.030	Main	1	0	0	0	0	0	1	Figures: (6) It does not have figures or have figures that do not belong to the above class. Nitrogen Isotherm: No	6	6	TN	TN	TN	TN	TN	TP
10.1016/j.ica.2016.08.030	Main	2	0	0	0	0	0	1	Figures: (4);(6) Nitrogen Isotherm: No	6	46	TN	TN	TN	FP	TN	FN
10.1016/j.ica.2016.08.030	Main	3	0	0	0	1	0	0	Figures: (4) Crystal structure or topology illustration Nitrogen Isotherm: No	4	4	TN	TN	TN	TP	TN	TN
10.1016/j.ica.2016.08.030	Main	4	0	0	0	1	0	0	Figures: (4) Nitrogen Isotherm: No	4	4	TN	TN	TN	TP	TN	TN
10.1016/j.ica.2016.08.030	Main	5	0	0	0	1	0	0	Figures: (4) Nitrogen Isotherm: No	4	4	TN	TN	TN	TP	TN	TN
10.1016/j.ica.2016.08.030	Main	6	0	0	0	0	0	1	Figures: (6) It does not have figures or have figures that do not belong to the above class Nitrogen Isotherm: No	6	6	TN	TN	TN	TN	TN	TP
10.1016/j.inoche.2015.02.023	Main	1	0	0	0	0	0	1	Figures: (6) It does not have figures or have figures than not belong to above class Nitrogen Isotherm: No	6	6	TN	TN	TN	TN	TN	TP
10.1016/j.inoche.2015.02.023	Main	2	0	0	0	1	0	0	Figures: (4);(5) Nitrogen Isotherm: Figure 3 Compound: 5-FU Porosity: N/A Hysteresis: Yes Saturation: 20 - 80 cm3/g Position: (0.5, 0.75, 1, 1)	4	45	TN	TN	TN	TP	FP	TN
10.1016/j.inoche.2015.02.023	Main	3	0	0	0	0	0	1	Figures: (6) It does not have figures or have figures than not belong to above class Nitrogen Isotherm: No	6	6	TN	TN	TN	TN	TN	TP
10.1016/j.inoche.2015.03.005	Supporting Information	1	0	0	0	0	0	1	Figures: [Answer: (6) It does not have figures or have figures that do not belong to the above class] Nitrogen Isotherm: No	6	6	TN	TN	TN	TN	TN	TP
10.1016/j.inoche.2015.03.005	Supporting Information	2	0	0	0	0	0	1	The image provided is a text excerpt from a scientific paper, and it does not contain any figures or illustrations. Therefore, based on the content visible in the image and the instructions provided for answering, here is the template answer:_x000D_ _x000D_ Figures: [Answer: (6)]_x000D_ Nitrogen Isotherm: No	6	6	TN	TN	TN	TN	TN	TP
10.1016/j.inoche.2015.03.005	Supporting Information	3	0	0	0	0	0	1	Figures: (6) It does not have figures or have figures than not belong to above class Nitrogen Isotherm: No	6	6	TN	TN	TN	TN	TN	TP
10.1016/j.inoche.2015.03.005	Supporting Information	4	0	0	0	0	0	1	Figures: (6) It does not have figures or have figures than not belong to above class Nitrogen Isotherm: No	6	6	TN	TN	TN	TN	TN	TP
10.1016/j.inoche.2015.03.005	Supporting Information	5	0	0	0	1	0	0	Figures: (4) Crystal structure or topology illustration Nitrogen Isotherm: No	4	4	TN	TN	TN	TP	TN	TN
10.1016/j.inoche.2015.03.005	Supporting Information	6	0	1	1	0	0	0	Figures: (2);(3) Nitrogen Isotherm: No	23	23	TN	TP	TP	TN	TN	TN
10.1016/j.inoche.2015.03.005	Main	1	0	0	0	0	0	1	Figures: (6) It does not have figures or have figures than not belong to the above class Nitrogen Isotherm: No	6	6	TN	TN	TN	TN	TN	TP
10.1016/j.inoche.2015.03.005	Main	2	0	0	0	1	0	0	Figures: (4) Nitrogen Isotherm: No	4	4	TN	TN	TN	TP	TN	TN
10.1016/j.inoche.2015.03.005	Main	3	0	0	0	1	0	0	Figures: (4) Nitrogen Isotherm: No	4	4	TN	TN	TN	TP	TN	TN
10.1016/j.inoche.2015.03.005	Main	4	0	0	0	0	0	1	Figures: (6) It does not have figures or have figures than not belong to above class Nitrogen Isotherm: No	6	6	TN	TN	TN	TN	TN	TP
10.1016/j.inoche.2015.03.028	Supporting Information	1	0	0	0	0	0	1	Figures: [Answer: (6)] Nitrogen Isotherm: No	6	6	TN	TN	TN	TN	TN	TP
10.1016/j.inoche.2015.03.028	Supporting Information	2	0	0	0	0	0	1	The provided image is a text excerpt and does not contain any figures, so I will provide a response based on the template for when no nitrogen isotherm or CCDC code is found:_x000D_ _x000D_ Figures: [Answer: (6)]_x000D_ Nitrogen Isotherm: No	6	6	TN	TN	TN	TN	TN	TP
10.1016/j.inoche.2015.03.028	Supporting Information	3	0	0	0	0	0	1	Figures: (6) It does not have figures or have figures than not belong to above class Nitrogen Isotherm: No	6	6	TN	TN	TN	TN	TN	TP
10.1016/j.inoche.2015.03.028	Supporting Information	4	0	0	0	0	0	1	Figures: (6) It does not have figures or have figures than not belong to above class Nitrogen Isotherm: No	6	6	TN	TN	TN	TN	TN	TP
10.1016/j.inoche.2015.03.028	Supporting Information	5	0	0	0	1	0	0	Figures: (4) Nitrogen Isotherm: No	4	4	TN	TN	TN	TP	TN	TN
10.1016/j.inoche.2015.03.028	Supporting Information	6	0	0	0	1	0	0	Figures: (4) Nitrogen Isotherm: No	4	4	TN	TN	TN	TP	TN	TN
10.1016/j.inoche.2015.03.028	Supporting Information	7	0	1	1	0	0	0	Figures: (2);(3) Nitrogen Isotherm: No	23	23	TN	TP	TP	TN	TN	TN
10.1016/j.inoche.2015.03.028	Supporting Information	8	1	0	0	0	1	0	Figures: (1);(5) Nitrogen Isotherm: Fig. S3 Compound: 1 Porosity: N/A Hysteresis: Yes Saturation: 150-180 cm^3/g Position: (0, 0.1, 1, 0.9)	15	15	TP	TN	TN	TN	TP	TN
10.1016/j.inoche.2015.03.028	Supporting Information	9	0	0	0	0	0	1	Figures: (6) It does not have figures or have figures than not belong to above class Nitrogen Isotherm: No	6	6	TN	TN	TN	TN	TN	TP
10.1016/j.inoche.2015.03.028	Main	1	0	0	0	0	0	1	Figures: (6) It does not have figures or have figures than not belong to above class Nitrogen Isotherm: No	6	6	TN	TN	TN	TN	TN	TP
10.1016/j.inoche.2015.03.028	Main	2	0	0	0	0	0	1	Figures: (6) It does not have figures or have figures than not belong to above class Nitrogen Isotherm: No	6	6	TN	TN	TN	TN	TN	TP
10.1016/j.inoche.2015.03.028	Main	3	0	0	0	0	0	1	Figures: [Answer: (6) It does not have figures or have figures than not belong to above class] Nitrogen Isotherm: No	6	6	TN	TN	TN	TN	TN	TP
10.1016/j.inoche.2015.06.036	Supporting Information	1	0	0	0	0	0	1	Figures: (6) It does not have figures or have figures than not belong to the above class Nitrogen Isotherm: No	6	6	TN	TN	TN	TN	TN	TP
10.1016/j.inoche.2015.06.036	Supporting Information	2	0	0	0	0	0	1	Figures: (6) It does not have figures or have figures than not belong to above class Nitrogen Isotherm: No	6	6	TN	TN	TN	TN	TN	TP
10.1016/j.inoche.2015.06.036	Supporting Information	3	0	0	0	0	0	1	Figures: (6) It does not have figures or have figures than not belong to above class Nitrogen Isotherm: No	6	6	TN	TN	TN	TN	TN	TP
10.1016/j.inoche.2015.06.036	Supporting Information	4	0	0	0	0	0	1	Figures: [Answer: (6) It does not have figures or have figures than not belong to above class] Nitrogen Isotherm: No	6	6	TN	TN	TN	TN	TN	TP
10.1016/j.inoche.2015.06.036	Supporting Information	5	0	0	0	0	0	1	Figures: (6) It does not have figures or have figures than not belong to above class Nitrogen Isotherm: No	6	6	TN	TN	TN	TN	TN	TP
10.1016/j.inoche.2015.06.036	Supporting Information	6	0	0	0	0	0	1	Figures: [Answer: (6) It does not have figures or have figures than not belong to above class] Nitrogen Isotherm: No	6	6	TN	TN	TN	TN	TN	TP
10.1016/j.inoche.2015.06.036	Supporting Information	7	0	0	0	0	0	1	Figures: [Answer: (6)] Nitrogen Isotherm: No	6	6	TN	TN	TN	TN	TN	TP
10.1016/j.inoche.2015.06.036	Supporting Information	8	0	0	0	0	0	1	Figures: (6) It does not have figures or have figures than not belong to above class Nitrogen Isotherm: No	6	6	TN	TN	TN	TN	TN	TP
10.1016/j.inoche.2015.06.036	Supporting Information	9	0	0	0	0	0	1	Figures: (6) It does not have figures or have figures than not belong to the above class. Nitrogen Isotherm: No	6	6	TN	TN	TN	TN	TN	TP
10.1016/j.inoche.2015.06.036	Supporting Information	10	0	1	0	0	0	0	Figures: (2) Nitrogen Isotherm: No	2	2	TN	TP	TN	TN	TN	TN
10.1016/j.inoche.2015.06.036	Supporting Information	11	0	0	0	1	0	0	Figures: (4) Crystal structure or topology illustration Nitrogen Isotherm: No	4	4	TN	TN	TN	TP	TN	TN
10.1016/j.inoche.2015.06.036	Supporting Information	12	0	0	0	0	0	1	The provided image appears to be a textual page from a scientific article or report, possibly discussing some aspects of chemistry, such as metal-organic frameworks or coordination polymers. From the text, it seems to be dealing with the structural characteristics of certain compounds, particularly noting double bridges and sheet layers in crystal structures._x000D_ _x000D_ Based on the informati…	6	6	TN	TN	TN	TN	TN	TP
10.1016/j.inoche.2015.06.036	Supporting Information	13	0	0	0	0	0	1	Figures: (6) It does not have figures or have figures that do not belong to the above class. Nitrogen Isotherm: No	6	6	TN	TN	TN	TN	TN	TP
10.1016/j.inoche.2015.06.036	Supporting Information	14	0	0	1	0	0	0	Figures: (3) Nitrogen Isotherm: No	3	3	TN	TN	TP	TN	TN	TN
10.1016/j.inoche.2015.06.036	Supporting Information	15	0	1	0	0	0	0	Figures: (2) Nitrogen Isotherm: No	2	2	TN	TP	TN	TN	TN	TN
10.1016/j.inoche.2015.06.036	Supporting Information	16	0	0	0	0	0	1	Figures: (6) It does not have figures or have figures than not belong to the above class. Nitrogen Isotherm: No	6	6	TN	TN	TN	TN	TN	TP
10.1016/j.inoche.2015.06.036	Supporting Information	17	0	0	0	0	0	1	Figures: (6) It does not have figures or have figures than not belong to above class Nitrogen Isotherm: No	6	6	TN	TN	TN	TN	TN	TP
10.1016/j.inoche.2015.06.036	Supporting Information	18	0	0	0	0	0	1	Figures: (6) It does not have figures or have figures than not belong to above class_x000D_ Nitrogen Isotherm: No	6	6	TN	TN	TN	TN	TN	TP
10.1016/j.inoche.2015.06.036	Supporting Information	19	0	0	0	0	0	1	Figures: (6) It does not have figures or belong to the above class Nitrogen Isotherm: No	6	6	TN	TN	TN	TN	TN	TP
10.1016/j.inoche.2015.06.036	Main	1	0	0	0	0	0	1	Figures: [Answer: (6) It does not have figures or have figures than not belong to above class] Nitrogen Isotherm: No	6	6	TN	TN	TN	TN	TN	TP
10.1016/j.inoche.2015.06.036	Main	2	0	0	0	1	0	0	Figures: (4) Nitrogen Isotherm: No	4	4	TN	TN	TN	TP	TN	TN
10.1016/j.inoche.2015.06.036	Main	3	0	0	0	0	0	1	Figures: (5);(6) Nitrogen Isotherm: No	6	56	TN	TN	TN	TN	FP	FN
10.1016/j.inoche.2015.06.036	Main	4	0	0	0	0	0	1	Figures: [Answer: (6) It does not have figures or have figures than not belong to the above class] Nitrogen Isotherm: No	6	6	TN	TN	TN	TN	TN	TP
10.1016/j.inoche.2015.12.019	Supporting Information	1	0	0	0	0	0	1	Figures: (6) It does not have figures or have figures than not belong to the above class_x000D_ Nitrogen Isotherm: No	6	6	TN	TN	TN	TN	TN	TP
10.1016/j.inoche.2015.12.019	Supporting Information	2	0	0	0	0	0	1	Figures: (6) It does not have figures or have figures that do not belong to the above class Nitrogen Isotherm: No	6	6	TN	TN	TN	TN	TN	TP
10.1016/j.inoche.2015.12.019	Supporting Information	3	0	0	0	1	0	0	Figures: (4);(5) Nitrogen Isotherm: No	4	45	TN	TN	TN	TP	FP	TN
10.1016/j.inoche.2015.12.019	Supporting Information	4	0	1	1	0	0	0	Figures: (2);(3) Nitrogen Isotherm: No	23	23	TN	TP	TP	TN	TN	TN
10.1016/j.inoche.2015.12.019	Supporting Information	5	0	0	0	0	0	1	The image you have provided is text-only, specifically referencing citations for programs associated with crystallography by G.M. Sheldrick. There are no figures, including nitrogen isotherms, PXRD patterns, TGA curves, illustrations of crystal structures or topologies, or any other gas adsorption isotherms in this image. It is strictly bibliographic in content. Hence, I will provide a response a…	6	6	TN	TN	TN	TN	TN	TP
10.1016/j.inoche.2015.12.019	Main	1	0	0	0	0	0	1	Figures: (6) It does not have figures or have figures than not belong to above class Nitrogen Isotherm: No	6	6	TN	TN	TN	TN	TN	TP
10.1016/j.inoche.2015.12.019	Main	2	0	0	0	1	0	0	Figures: (4) Crystal structure or topology illustration Nitrogen Isotherm: No	4	4	TN	TN	TN	TP	TN	TN
10.1016/j.inoche.2015.12.019	Main	3	0	0	0	0	0	1	Figures: (6) It does not have figures or have figures than not belong to above class Nitrogen Isotherm: No	6	6	TN	TN	TN	TN	TN	TP
10.1016/j.jssc.2014.11.015	Supporting Information	1	0	0	0	0	0	1	The image you've provided appears to be a title page or an introductory page to a section of a scientific article or supporting information document for a publication. It lists the title of the section, the topic, and the authors who contributed to it. The content mentioned relates to manganese coordination polymers and their synthesis, crystal structures, and magnetic properties, along with the …	6	6	TN	TN	TN	TN	TN	TP
10.1016/j.jssc.2014.11.015	Supporting Information	2	0	0	0	0	0	1	Figures: (6) It does not have figures or have figures than not belong to the above class Nitrogen Isotherm: No	6	6	TN	TN	TN	TN	TN	TP
10.1016/j.jssc.2014.11.015	Supporting Information	3	0	0	0	0	0	1	Figures: (6) It does not have figures or have figures than not belong to above class Nitrogen Isotherm: No	6	6	TN	TN	TN	TN	TN	TP
10.1016/j.jssc.2014.11.015	Supporting Information	4	0	0	0	0	0	1	Figures: (6) It does not have figures or have figures than not belong to above class Nitrogen Isotherm: No	6	6	TN	TN	TN	TN	TN	TP
10.1016/j.jssc.2014.11.015	Supporting Information	5	0	1	0	1	0	0	Figures: (4);(2) Nitrogen Isotherm: No	24	24	TN	TP	TN	TP	TN	TN
10.1016/j.jssc.2014.11.015	Supporting Information	6	0	1	0	1	0	0	Figures: (2);(4) Nitrogen Isotherm: No	24	24	TN	TP	TN	TP	TN	TN
10.1016/j.jssc.2014.11.015	Main	1	0	0	0	0	0	1	Figures: [Answer: (6) It does not have figures or have figures than not belong to above class] Nitrogen Isotherm: No	6	6	TN	TN	TN	TN	TN	TP
10.1016/j.jssc.2014.11.015	Main	2	0	0	0	0	0	1	Figures: [Answer: (6) It does not have figures or have figures than not belong to above class] Nitrogen Isotherm: No	6	6	TN	TN	TN	TN	TN	TP
10.1016/j.jssc.2014.11.015	Main	3	0	0	0	0	0	1	Figures: (6) It does not have figures or have figures than not belong to above class Nitrogen Isotherm: No	6	6	TN	TN	TN	TN	TN	TP
10.1016/j.jssc.2014.11.015	Main	4	0	0	0	1	0	0	Figures: (4) Nitrogen Isotherm: No	4	4	TN	TN	TN	TP	TN	TN
10.1016/j.jssc.2014.11.015	Main	5	0	0	0	1	0	0	Figures: (4) Nitrogen Isotherm: No	4	4	TN	TN	TN	TP	TN	TN
10.1016/j.jssc.2014.11.015	Main	6	0	0	0	1	0	0	Figures: (4) Nitrogen Isotherm: No	4	4	TN	TN	TN	TP	TN	TN
10.1016/j.jssc.2014.11.015	Main	7	0	0	0	1	0	0	Figures: (4) Nitrogen Isotherm: No	4	4	TN	TN	TN	TP	TN	TN
10.1016/j.jssc.2014.11.015	Main	8	0	0	0	1	0	0	Figures: (4) Nitrogen Isotherm: No	4	4	TN	TN	TN	TP	TN	TN
10.1016/j.jssc.2014.11.015	Main	9	0	0	0	0	0	1	Figures: (6) It does not have figures or have figures than not belong to above class. Nitrogen Isotherm: No	6	6	TN	TN	TN	TN	TN	TP
10.1016/j.jssc.2014.11.015	Main	10	0	0	0	0	0	1	Figures: (6) It does not have figures or have figures than not belong to above class_x000D_ Nitrogen Isotherm: No	6	6	TN	TN	TN	TN	TN	TP
10.1016/j.jssc.2015.05.012	Main	1	0	0	0	0	0	1	Figures: (6) It does not have figures or have figures than not belong to above class Nitrogen Isotherm: No	6	6	TN	TN	TN	TN	TN	TP
10.1016/j.jssc.2015.05.012	Main	2	0	0	0	0	0	1	Figures: (6) It does not have figures or have figures than not belong to above class Nitrogen Isotherm: No	6	6	TN	TN	TN	TN	TN	TP
10.1016/j.jssc.2015.05.012	Main	3	0	0	0	1	0	0	Figures: (4) Nitrogen Isotherm: No	4	4	TN	TN	TN	TP	TN	TN
10.1016/j.jssc.2015.05.012	Main	4	0	0	0	1	0	0	Figures: (4) Crystal structure or topology illustration Nitrogen Isotherm: No	4	4	TN	TN	TN	TP	TN	TN
10.1016/j.jssc.2015.05.012	Main	5	0	0	0	1	0	0	Figures: (3);(4) Nitrogen Isotherm: No	4	34	TN	TN	FP	TP	TN	TN
10.1016/j.jssc.2015.05.012	Main	6	0	0	0	0	1	0	Figures: (5) Nitrogen Isotherm: Figure 10 (a) Compound: Compound 1, Compound 2, Compound 3 Porosity: N/A Saturation: 30 - 35 cm3/g for Compound 1; 20 - 25 cm3/g for Compound 2; 15 - 20 cm3/g for Compound 3 Position: (0, 0, 0.5, 0.6)	5	5	TN	TN	TN	TN	TP	TN
10.1016/j.jssc.2015.05.012	Main	7	0	0	0	0	0	1	Figures: (6) Nitrogen Isotherm: No	6	6	TN	TN	TN	TN	TN	TP
10.1016/j.jssc.2015.05.012	Main	8	0	0	0	0	0	1	Figures: (6) It does not have figures or have figures than not belong to above class Nitrogen Isotherm: No	6	6	TN	TN	TN	TN	TN	TP
10.1016/j.jssc.2015.05.012	Main	9	0	0	0	0	0	1	Figures: [Answer: (6)] Nitrogen Isotherm: No	6	6	TN	TN	TN	TN	TN	TP
10.1016/j.jssc.2016.09.008	Supporting Information	1	0	0	0	0	0	1	Figures: (6) It does not have figures or have figures than not belong to above class Nitrogen Isotherm: No	6	6	TN	TN	TN	TN	TN	TP
10.1016/j.jssc.2016.09.008	Supporting Information	2	0	0	0	0	0	1	Figures: (6) It does not have figures or have figures that do not belong to the above class Nitrogen Isotherm: No	6	6	TN	TN	TN	TN	TN	TP
10.1016/j.jssc.2016.09.008	Supporting Information	3	0	0	0	0	0	1	Figures: (6) It does not have figures or have figures than not belong to above class Nitrogen Isotherm: No	6	6	TN	TN	TN	TN	TN	TP
10.1016/j.jssc.2016.09.008	Supporting Information	4	0	0	0	0	0	1	Figures: (6) It does not have figures or have figures than not belong to above class Nitrogen Isotherm: No	6	6	TN	TN	TN	TN	TN	TP
10.1016/j.jssc.2016.09.008	Supporting Information	5	0	0	0	0	0	1	Figures: (6) It does not have figures or have figures than not belong to above class Nitrogen Isotherm: No	6	6	TN	TN	TN	TN	TN	TP
10.1016/j.jssc.2016.09.008	Supporting Information	6	0	0	0	0	0	1	Figures: (6) It does not have figures or have figures than not belong to above class Nitrogen Isotherm: No	6	6	TN	TN	TN	TN	TN	TP
10.1016/j.jssc.2016.09.008	Supporting Information	7	0	0	0	1	0	0	Figures: (4) Nitrogen Isotherm: No	4	4	TN	TN	TN	TP	TN	TN
10.1016/j.jssc.2016.09.008	Supporting Information	8	0	0	0	1	0	0	Figures: (4) Nitrogen Isotherm: No	4	4	TN	TN	TN	TP	TN	TN
10.1016/j.jssc.2016.09.008	Supporting Information	9	0	0	0	1	0	0	Figures: (4) Nitrogen Isotherm: No	4	4	TN	TN	TN	TP	TN	TN
10.1016/j.jssc.2016.09.008	Supporting Information	10	0	0	0	1	0	0	Figures: (4) Crystal structure or topology illustration Nitrogen Isotherm: No	4	4	TN	TN	TN	TP	TN	TN
10.1016/j.jssc.2016.09.008	Supporting Information	11	0	0	0	0	0	1	Figures: (6) It does not have figures or have figures that do not belong to the above class._x000D_ Nitrogen Isotherm: No	6	6	TN	TN	TN	TN	TN	TP
10.1016/j.jssc.2016.09.008	Supporting Information	12	0	0	1	0	0	0	Figures: (3) Nitrogen Isotherm: No	3	3	TN	TN	TP	TN	TN	TN
10.1016/j.jssc.2016.09.008	Supporting Information	13	0	1	0	0	0	0	Figures: (3);(3) Nitrogen Isotherm: No	2	3	TN	FN	FP	TN	TN	TN
10.1016/j.jssc.2016.09.008	Supporting Information	14	0	0	0	0	0	1	Figures: (6) It does not have figures or have figures than not belong to the above class Nitrogen Isotherm: No	6	6	TN	TN	TN	TN	TN	TP
10.1016/j.jssc.2016.09.008	Main	1	0	0	0	0	0	1	Figures: [Answer: (6) It does not have figures or have figures than not belong to above class] Nitrogen Isotherm: No	6	6	TN	TN	TN	TN	TN	TP
10.1016/j.jssc.2016.09.008	Main	2	0	0	0	0	0	1	Figures: (6) It does not have figures or have figures than not belong to above class Nitrogen Isotherm: No	6	6	TN	TN	TN	TN	TN	TP
10.1016/j.jssc.2016.09.008	Main	3	0	0	0	1	0	0	Figures: (4) Crystal structure or topology illustration Nitrogen Isotherm: No	4	4	TN	TN	TN	TP	TN	TN
10.1016/j.jssc.2016.09.008	Main	4	0	0	0	1	0	0	Figures: (4) Crystal structure or topology illustration Nitrogen Isotherm: No	4	4	TN	TN	TN	TP	TN	TN
10.1016/j.jssc.2016.09.008	Main	5	0	0	0	1	0	0	Figures: (4) Nitrogen Isotherm: No	4	4	TN	TN	TN	TP	TN	TN
10.1016/j.jssc.2016.09.008	Main	6	0	0	0	1	0	0	Figures: (4) Crystal structure or topology illustration_x000D_ Nitrogen Isotherm: No	4	4	TN	TN	TN	TP	TN	TN
10.1016/j.jssc.2016.09.008	Main	7	0	0	0	1	0	0	Figures: (4) Nitrogen Isotherm: No	4	4	TN	TN	TN	TP	TN	TN
10.1016/j.jssc.2016.09.008	Main	8	0	1	0	0	0	0	Figures: (2);(6) Nitrogen Isotherm: No	2	26	TN	TP	TN	TN	TN	FP
10.1021/ac403674p	Supporting Information	1	0	0	0	0	0	1	Figures: [Answer: (6) It does not have figures or have figures than not belong to above class]_x000D_ Nitrogen Isotherm: No	6	6	TN	TN	TN	TN	TN	TP
10.1021/ac403674p	Supporting Information	2	0	0	0	0	0	1	Figures: (6) It does not have figures or have figures than not belong to above class Nitrogen Isotherm: No	6	6	TN	TN	TN	TN	TN	TP
10.1021/ac403674p	Supporting Information	3	0	0	0	0	0	1	Figures: (6) It does not have figures or have figures than not belong to the above class_x000D_ Nitrogen Isotherm: No	6	6	TN	TN	TN	TN	TN	TP
10.1021/ac403674p	Supporting Information	4	0	0	1	0	0	0	Figures: (3) Nitrogen Isotherm: No	3	3	TN	TN	TP	TN	TN	TN
10.1021/ac403674p	Supporting Information	5	0	1	0	0	0	0	Figures: (2);(5) Nitrogen Isotherm: No	2	25	TN	TP	TN	TN	FP	TN
10.1021/ac403674p	Supporting Information	6	0	0	0	0	0	1	Figures: [Answer: (6) It does not have figures or have figures than not belong to above class] Nitrogen Isotherm: No	6	6	TN	TN	TN	TN	TN	TP
10.1021/ac403674p	Supporting Information	7	0	0	0	0	0	1	Figures: (6) It does not have figures or have figures than not belong to above class Nitrogen Isotherm: No	6	6	TN	TN	TN	TN	TN	TP
10.1021/ac403674p	Supporting Information	8	0	0	0	0	0	1	Figures: (6) It does not have figures or have figures than not belong to above class Nitrogen Isotherm: No	6	6	TN	TN	TN	TN	TN	TP
10.1021/ac403674p	Main	1	0	0	0	0	0	1	Figures: (6) It does not have figures or have figures than not belong to above class Nitrogen Isotherm: No	6	6	TN	TN	TN	TN	TN	TP
10.1021/ac403674p	Main	2	0	0	0	1	0	0	Figures: (4) Nitrogen Isotherm: No	4	4	TN	TN	TN	TP	TN	TN
10.1021/ac403674p	Main	3	0	0	0	0	0	1	Figures: (3);(4)_x000D_ Nitrogen Isotherm: No	6	34	TN	TN	FP	FP	TN	FN
10.1021/ac403674p	Main	4	0	0	0	0	0	1	Figures: (6) It does not have figures or have figures than not belong to above class Nitrogen Isotherm: No	6	6	TN	TN	TN	TN	TN	TP
10.1021/ac403674p	Main	5	0	0	0	0	0	1	Figures: (6) It does not have figures or have figures than not belong to above class Nitrogen Isotherm: No	6	6	TN	TN	TN	TN	TN	TP
10.1021/acs.cgd.5b01554	Supporting Information	1	0	0	0	0	0	1	Figures: (6) It does not have figures or have figures than not belong to above class Nitrogen Isotherm: No	6	6	TN	TN	TN	TN	TN	TP
10.1021/acs.cgd.5b01554	Supporting Information	2	0	0	0	1	0	0	Figures: (4)_x000D_ Nitrogen Isotherm: No	4	4	TN	TN	TN	TP	TN	TN
10.1021/acs.cgd.5b01554	Supporting Information	3	0	0	0	1	0	0	Figures: (4) Nitrogen Isotherm: No	4	4	TN	TN	TN	TP	TN	TN
10.1021/acs.cgd.5b01554	Supporting Information	4	0	0	0	1	0	0	Figures: (4) Nitrogen Isotherm: No	4	4	TN	TN	TN	TP	TN	TN
10.1021/acs.cgd.5b01554	Supporting Information	5	0	1	0	0	0	0	Figures: (2) Nitrogen Isotherm: No	2	2	TN	TP	TN	TN	TN	TN
10.1021/acs.cgd.5b01554	Supporting Information	6	0	1	0	0	0	0	Figures: (2) Nitrogen Isotherm: No	2	2	TN	TP	TN	TN	TN	TN
10.1021/acs.cgd.5b01554	Supporting Information	7	0	0	0	0	0	1	Figures: (6) It does not have figures or have figures than not belong to above class Nitrogen Isotherm: No	6	6	TN	TN	TN	TN	TN	TP
10.1021/acs.cgd.5b01554	Supporting Information	8	0	0	0	0	0	1	Figures: [Answer: (6) It does not have figures or have figures than not belong to above class] Nitrogen Isotherm: No	6	6	TN	TN	TN	TN	TN	TP
10.1021/acs.cgd.5b01554	Supporting Information	9	0	0	0	0	0	1	Figures: [Answer: (6)] Nitrogen Isotherm: No	6	6	TN	TN	TN	TN	TN	TP
10.1021/acs.cgd.5b01554	Supporting Information	10	0	0	0	0	0	1	Figures: [Answer: (6) It does not have figures or have figures than not belong to above class] Nitrogen Isotherm: No	6	6	TN	TN	TN	TN	TN	TP
10.1021/acs.cgd.5b01554	Supporting Information	11	0	0	0	0	0	1	Figures: [Answer: (6)]_x000D_ Nitrogen Isotherm: No	6	6	TN	TN	TN	TN	TN	TP
10.1021/acs.cgd.5b01554	Supporting Information	12	0	0	0	0	0	1	Figures: [Answer: (6)] Nitrogen Isotherm: No	6	6	TN	TN	TN	TN	TN	TP
10.1021/acs.cgd.5b01554	Supporting Information	13	0	0	0	0	0	1	Figures: (6) Nitrogen Isotherm: No	6	6	TN	TN	TN	TN	TN	TP
10.1021/acs.cgd.5b01554	Supporting Information	14	0	0	0	0	0	1	I apologize, but the image you uploaded appears to be a table or a list of numerical values, not a graphical representation or literature page discussing metal-organic frameworks as described. Therefore, I am unable to answer your questions based on the provided image. To provide accurate answers to your questions, please upload a clear image of the literature page with the figures you mentioned.…	6	6	TN	TN	TN	TN	TN	TP
10.1021/acs.cgd.5b01554	Supporting Information	15	0	0	0	0	0	1	Figures: (6) It does not have figures or have figures than not belong to above class Nitrogen Isotherm: No	6	6	TN	TN	TN	TN	TN	TP
10.1021/acs.cgd.5b01554	Supporting Information	16	0	0	0	0	0	1	The image provided seems to be a text excerpt, possibly from a scientific publication, that lists crystallographic data for metal-organic frameworks (MOFs) or similar compounds. However, there are no figures present in the image itself. It contains numerical data and parameters that could be associated with crystal structures, such as lattice parameters and atomic positions, but no graphical data…	6	6	TN	TN	TN	TN	TN	TP
10.1021/acs.cgd.5b01554	Supporting Information	17	0	0	0	0	0	1	The image provided seems to be a text-based description or data set and does not contain any figures, illustrations, graphs, or visual representations of data typically associated with metal-organic frameworks (MOFs) studies. The information presented appears to be some sort of tabulated numerical data, possibly related to experimental results or calculations._x000D_ _x000D_ Given this observatio…	6	6	TN	TN	TN	TN	TN	TP
10.1021/acs.cgd.5b01554	Supporting Information	18	0	0	0	0	0	1	The provided image does not contain any figures or diagrams. It seems to be a text-based document or spreadsheet containing various numerical values arranged in a tabular format without any graphical representations._x000D_ _x000D_ Since there are no figures present, we cannot classify any of the numbers as relating to a nitrogen isotherm, PXRD pattern, TGA curve, crystal structure or topology il…	6	6	TN	TN	TN	TN	TN	TP
10.1021/acs.cgd.5b01554	Supporting Information	19	0	0	0	0	0	1	The image you've provided appears to be a text-only page and does not contain any figures, graphs, or illustrations. As such, it's not possible to identify any figures like nitrogen adsorption-desorption isotherms, PXRD patterns, TGA curves, crystal structure or topology illustrations, or other gas sorption isotherms._x000D_ _x000D_ Given the information provided and the lack of figures in the im…	6	6	TN	TN	TN	TN	TN	TP
10.1021/acs.cgd.5b01554	Supporting Information	20	0	0	0	0	0	1	The image you provided seems to be a screenshot or a photograph of a section of a page that includes numerical data, likely from a study or report on metal-organic frameworks (MOFs). This data could be related to various properties or measurements of MOFs such as adsorption isotherms, PXRD patterns, TGA curves, etc. However, the image does not include any figures or illustrations ? ? it is purely…	6	6	TN	TN	TN	TN	TN	TP
10.1021/acs.cgd.5b01554	Supporting Information	21	0	0	0	0	0	1	Figures: (6) It does not have figures or have figures than not belong to above class_x000D_ Nitrogen Isotherm: No	6	6	TN	TN	TN	TN	TN	TP
10.1021/acs.cgd.5b01554	Main	1	0	0	0	1	0	0	Figures: (4);(5) Nitrogen Isotherm: No	4	45	TN	TN	TN	TP	FP	TN
10.1021/acs.cgd.5b01554	Main	2	0	0	0	1	0	0	Figures: (6) It does not have figures or have figures than not belong to above class Nitrogen Isotherm: No	4	6	TN	TN	TN	FN	TN	FP
10.1021/acs.cgd.5b01554	Main	3	0	0	0	0	0	1	Figures: (6) It does not have figures or have figures than not belong to above class Nitrogen Isotherm: No	6	6	TN	TN	TN	TN	TN	TP
10.1021/acs.cgd.5b01554	Main	4	0	0	0	1	0	0	Figures: (4) Crystal structure or topology illustration Nitrogen Isotherm: No	4	4	TN	TN	TN	TP	TN	TN
10.1021/acs.cgd.5b01554	Main	5	0	0	0	1	0	0	Figures: (4) Nitrogen Isotherm: No	4	4	TN	TN	TN	TP	TN	TN
10.1021/acs.cgd.5b01554	Main	6	0	0	0	0	0	1	Figures: [Answer: (6) It does not have figures or have figures than not belong to above class] Nitrogen Isotherm: No	6	6	TN	TN	TN	TN	TN	TP
10.1021/acs.cgd.5b01554	Main	7	0	0	0	1	0	0	Figures: (4) Nitrogen Isotherm: No	4	4	TN	TN	TN	TP	TN	TN
10.1021/acs.cgd.5b01554	Main	8	0	0	0	0	0	1	Figures: [Answer: (6) It does not have figures or have figures than not belong to above class] Nitrogen Isotherm: No	6	6	TN	TN	TN	TN	TN	TP
10.1021/acs.cgd.5b01554	Main	9	0	1	1	0	0	0	Figures: (2);(3) Nitrogen Isotherm: No	23	23	TN	TP	TP	TN	TN	TN
10.1021/acs.cgd.5b01554	Main	10	0	0	0	0	0	1	Figures: (6) It does not have figures or have figures than not belong to above class_x000D_ Nitrogen Isotherm: No	6	6	TN	TN	TN	TN	TN	TP
10.1021/acs.cgd.5b01686	Supporting Information	1	0	0	0	0	0	1	Figures: (6) It does not have figures or have figures than not belong to the above class_x000D_ Nitrogen Isotherm: No	6	6	TN	TN	TN	TN	TN	TP
10.1021/acs.cgd.5b01686	Supporting Information	2	0	0	0	0	0	1	Figures: (6) It does not have figures or have figures than not belong to above class_x000D_ Nitrogen Isotherm: No	6	6	TN	TN	TN	TN	TN	TP
10.1021/acs.cgd.5b01686	Supporting Information	3	0	0	0	0	0	1	Figures: (6) It does not have figures or have figures than not belong to above class_x000D_ Nitrogen Isotherm: No	6	6	TN	TN	TN	TN	TN	TP
10.1021/acs.cgd.5b01686	Supporting Information	4	0	0	0	0	0	1	Figures: (6) It does not have figures or have figures than not belong to above class Nitrogen Isotherm: No	6	6	TN	TN	TN	TN	TN	TP
10.1021/acs.cgd.5b01686	Supporting Information	5	0	0	0	0	0	1	Figures: (6) It does not have figures or have figures than not belong to above class. Nitrogen Isotherm: No.	6	6	TN	TN	TN	TN	TN	TP
10.1021/acs.cgd.5b01686	Supporting Information	6	0	0	0	0	0	1	Figures: (6) It does not have figures or have figures that do not belong to the above class. Nitrogen Isotherm: No	6	6	TN	TN	TN	TN	TN	TP
10.1021/acs.cgd.5b01686	Supporting Information	7	0	0	0	0	0	1	Figures: (6) It does not have figures or have figures than not belong to above class Nitrogen Isotherm: No	6	6	TN	TN	TN	TN	TN	TP
10.1021/acs.cgd.5b01686	Supporting Information	8	0	0	1	0	0	0	Figures: (3) Nitrogen Isotherm: Figure S4 Compound: 1, Dehydrated 1a Porosity: N/A Hysteresis: Yes Saturation: 80 - 90% Position: (0,0,1,0.5)	3	3	TN	TN	TP	TN	TN	TN
10.1021/acs.cgd.5b01686	Supporting Information	9	0	1	0	0	0	0	Figures: (2) Nitrogen Isotherm: No	2	2	TN	TP	TN	TN	TN	TN
10.1021/acs.cgd.5b01686	Supporting Information	10	0	0	0	1	0	0	Figures: (4) Nitrogen Isotherm: No	4	4	TN	TN	TN	TP	TN	TN
10.1021/acs.cgd.5b01686	Supporting Information	11	0	0	0	1	0	0	Figures: (4) Nitrogen Isotherm: No	4	4	TN	TN	TN	TP	TN	TN
10.1021/acs.cgd.5b01686	Supporting Information	12	0	0	0	0	1	0	Figures: (5) Nitrogen Isotherm: No Compound: N/A Porosity: N/A Hysteresis: N/A Saturation: N/A Position: N/A	5	5	TN	TN	TN	TN	TP	TN
10.1021/acs.cgd.5b01686	Supporting Information	13	0	0	0	0	1	0	Figures: (5) Nitrogen Isotherm: No	5	5	TN	TN	TN	TN	TP	TN
10.1021/acs.cgd.5b01686	Supporting Information	14	0	0	0	0	1	0	Figures: (5) Nitrogen Isotherm: Figure S16; Figure S17 Compound: CO2, CH4, N2 Porosity: N/A Hysteresis: Yes Saturation: - For Figure S16: N2 approximately 5 - 10 cm^3/g - For Figure S17: N2 approximately 5 - 7 cm^3/g Position: - Figure S16: (0, 0, 1, 0.5) - Figure S17: (0, 0.5, 1, 1)	5	5	TN	TN	TN	TN	TP	TN
10.1021/acs.cgd.5b01686	Supporting Information	15	0	0	0	0	1	0	Figures: (5) Nitrogen Isotherm: Figure S18; Figure S19 Compound: N/A Porosity: N/A Hysteresis: No Saturation: For Figure S18: 0.2 - 0.3 mol/g For Figure S19: 0.06 - 0.12 mol/g Position: For Figure S18: (0,0,1,0.5) For Figure S19: (0,0.5,1,1)	5	5	TN	TN	TN	TN	TP	TN
10.1021/acs.cgd.5b01686	Supporting Information	16	0	0	0	0	1	0	Figures: (5) Nitrogen Isotherm: No Compound: N/A Porosity: N/A Hysteresis: N/A Saturation: N/A Position: N/A	5	5	TN	TN	TN	TN	TP	TN
10.1021/acs.cgd.5b01686	Supporting Information	17	0	0	0	0	0	1	Figures: (6) It does not have figures or have figures than not belong to above class_x000D_ Nitrogen Isotherm: No	6	6	TN	TN	TN	TN	TN	TP
10.1021/acs.cgd.5b01686	Main	1	0	0	0	0	0	1	Figures: (6) It does not have figures or have figures than not belong to above class Nitrogen Isotherm: No	6	6	TN	TN	TN	TN	TN	TP
10.1021/acs.cgd.5b01686	Main	2	0	0	0	1	0	0	Figures: (4) Nitrogen Isotherm: No	4	4	TN	TN	TN	TP	TN	TN
10.1021/acs.cgd.5b01686	Main	3	0	0	0	1	0	0	Figures: (2);(4) Nitrogen Isotherm: No	4	24	TN	FP	TN	TP	TN	TN
10.1021/acs.cgd.5b01686	Main	4	1	0	0	0	1	0	Figures: (1);(5) Nitrogen Isotherm: Figure 3 Compound: CO , N , CH Porosity: N/A Hysteresis: I do not know Saturation: 0 - 120 cm /g Position: (0,0.2,0.5,0.6)	15	15	TP	TN	TN	TN	TP	TN
10.1021/acs.cgd.5b01686	Main	5	0	0	0	0	0	1	Figures: (6) It does not have figures or have figures than not belong to above class Nitrogen Isotherm: No	6	6	TN	TN	TN	TN	TN	TP
10.1021/acs.cgd.5b01686	Main	6	0	0	0	0	0	1	Figures: (6) It does not have figures or have figures than not belong to above class Nitrogen Isotherm: No	6	6	TN	TN	TN	TN	TN	TP
10.1021/acs.cgd.6b00463	Supporting Information	1	0	0	0	0	0	1	Figures: (6) It does not have figures or have figures than not belong to above class Nitrogen Isotherm: No	6	6	TN	TN	TN	TN	TN	TP
10.1021/acs.cgd.6b00463	Supporting Information	2	0	0	0	0	0	1	Figures: (6) It does not have figures or have figures than not belong to above class Nitrogen Isotherm: No	6	6	TN	TN	TN	TN	TN	TP
10.1021/acs.cgd.6b00463	Supporting Information	3	0	0	0	0	0	1	Figures: (6) It does not have figures or have figures than not belong to above class Nitrogen Isotherm: No	6	6	TN	TN	TN	TN	TN	TP
10.1021/acs.cgd.6b00463	Supporting Information	4	0	1	0	0	0	0	Figures: (2) Nitrogen Isotherm: No	2	2	TN	TP	TN	TN	TN	TN
10.1021/acs.cgd.6b00463	Supporting Information	5	0	0	1	0	0	0	Figures: (3) Nitrogen Isotherm: No	3	3	TN	TN	TP	TN	TN	TN
10.1021/acs.cgd.6b00463	Supporting Information	6	0	0	0	0	0	1	Figures: (6) It does not have figures or have figures than not belong to above class Nitrogen Isotherm: No	6	6	TN	TN	TN	TN	TN	TP
10.1021/acs.cgd.6b00463	Supporting Information	7	0	0	0	1	0	0	Figures: (4) Nitrogen Isotherm: No	4	4	TN	TN	TN	TP	TN	TN
10.1021/acs.cgd.6b00463	Supporting Information	8	0	0	0	1	0	0	Figures: (4) Nitrogen Isotherm: No	4	4	TN	TN	TN	TP	TN	TN
10.1021/acs.cgd.6b00463	Supporting Information	9	0	0	0	1	0	0	Figures: (4) Nitrogen Isotherm: No	4	4	TN	TN	TN	TP	TN	TN
10.1021/acs.cgd.6b00463	Supporting Information	10	0	0	0	1	0	0	Figures: (4) Nitrogen Isotherm: No	4	4	TN	TN	TN	TP	TN	TN
10.1021/acs.cgd.6b00463	Supporting Information	11	0	0	0	1	0	0	Figures: (4) Nitrogen Isotherm: No	4	4	TN	TN	TN	TP	TN	TN
10.1021/acs.cgd.6b00463	Supporting Information	12	0	0	0	1	0	0	Figures: (4) Nitrogen Isotherm: No	4	4	TN	TN	TN	TP	TN	TN
10.1021/acs.cgd.6b00463	Supporting Information	13	0	0	0	1	0	0	Figures: (4) Nitrogen Isotherm: No	4	4	TN	TN	TN	TP	TN	TN
10.1021/acs.cgd.6b00463	Supporting Information	14	0	0	0	1	0	0	Figures: (4) Nitrogen Isotherm: No	4	4	TN	TN	TN	TP	TN	TN
10.1021/acs.cgd.6b00463	Supporting Information	15	0	0	0	1	0	0	Figures: (4) Crystal structure or topology illustration Nitrogen Isotherm: No	4	4	TN	TN	TN	TP	TN	TN
10.1021/acs.cgd.6b00463	Supporting Information	16	0	0	0	1	0	0	Figures: (4) Nitrogen Isotherm: No	4	4	TN	TN	TN	TP	TN	TN
10.1021/acs.cgd.6b00463	Supporting Information	17	0	0	0	0	0	1	Figures: (6) It does not have figures or have figures than not belong to above class Nitrogen Isotherm: No	6	6	TN	TN	TN	TN	TN	TP
10.1021/acs.cgd.6b00463	Supporting Information	18	0	0	0	0	0	1	Figures: (6) It does not have figures or have figures that not belong to above class Nitrogen Isotherm: No	6	6	TN	TN	TN	TN	TN	TP
10.1021/acs.cgd.6b00463	Supporting Information	19	0	0	0	0	0	1	Figures: (6) It does not have figures or have figures than not belong to above class Nitrogen Isotherm: No	6	6	TN	TN	TN	TN	TN	TP
10.1021/acs.cgd.6b00463	Supporting Information	20	0	1	0	0	0	0	Figures: (2) Nitrogen Isotherm: No	2	2	TN	TP	TN	TN	TN	TN
10.1021/acs.cgd.6b00463	Supporting Information	21	0	0	0	0	0	1	Figures: (6) It does not have figures or have figures than not belong to above class Nitrogen Isotherm: No	6	6	TN	TN	TN	TN	TN	TP
10.1021/acs.cgd.6b00463	Supporting Information	22	0	0	0	0	0	1	Figures: (6) It does not have figures or have figures than not belong to the above class. Nitrogen Isotherm: No	6	6	TN	TN	TN	TN	TN	TP
10.1021/acs.cgd.6b00463	Supporting Information	23	0	0	0	0	0	1	Figures: (6) It does not have figures or have figures than not belong to the above class Nitrogen Isotherm: No	6	6	TN	TN	TN	TN	TN	TP
10.1021/acs.cgd.6b00463	Supporting Information	24	0	0	0	0	0	1	The image provided is a page from a literature paper, which includes molecular diagrams and energy level data but no nitrogen isotherms or any other type of gas adsorption isotherms._x000D_ _x000D_ Figures: [Answer: (6)]_x000D_ Nitrogen Isotherm: No	6	6	TN	TN	TN	TN	TN	TP
10.1021/acs.cgd.6b00463	Supporting Information	25	0	0	0	0	0	1	Figures: (6) It does not have figures or have figures than not belong to above class Nitrogen Isotherm: No	6	6	TN	TN	TN	TN	TN	TP
10.1021/acs.cgd.6b00463	Supporting Information	26	0	0	0	0	0	1	Figures: (6) It does not have figures or have figures than not belong to the above class. Nitrogen Isotherm: No	6	6	TN	TN	TN	TN	TN	TP
10.1021/acs.cgd.6b00463	Supporting Information	27	0	1	0	0	0	0	Figures: (2) Nitrogen Isotherm: No	2	2	TN	TP	TN	TN	TN	TN
10.1021/acs.cgd.6b00463	Supporting Information	28	0	0	0	1	0	0	Figures: (4) Nitrogen Isotherm: No	4	4	TN	TN	TN	TP	TN	TN
10.1021/acs.cgd.6b00463	Supporting Information	29	0	0	0	1	0	0	Figures: (4) Nitrogen Isotherm: No	4	4	TN	TN	TN	TP	TN	TN
10.1021/acs.cgd.6b00463	Supporting Information	30	0	0	0	1	0	0	Figures: (4)_x000D_ Nitrogen Isotherm: No	4	4	TN	TN	TN	TP	TN	TN
10.1021/acs.cgd.6b00463	Supporting Information	31	0	0	0	0	0	1	Figures: [Answer: (6) It does not have figures or have figures than not belong to above class]_x000D_ Nitrogen Isotherm: No	6	6	TN	TN	TN	TN	TN	TP
10.1021/acs.cgd.6b00463	Main	1	0	0	0	1	0	0	Figures: (4)_x000D_ Nitrogen Isotherm: No	4	4	TN	TN	TN	TP	TN	TN
10.1021/acs.cgd.6b00463	Main	2	0	0	0	0	0	1	Figures: (6) It does not have figures or have figures than not belong to above class Nitrogen Isotherm: No	6	6	TN	TN	TN	TN	TN	TP
10.1021/acs.cgd.6b00463	Main	3	0	0	0	0	0	1	Figures: (6) It does not have figures or have figures than not belong to above class Nitrogen Isotherm: No	6	6	TN	TN	TN	TN	TN	TP
10.1021/acs.cgd.6b00463	Main	4	0	0	0	1	0	0	Figures: (4) Crystal structure or topology illustration Nitrogen Isotherm: No	4	4	TN	TN	TN	TP	TN	TN
10.1021/acs.cgd.6b00463	Main	5	0	0	0	1	0	0	Figures: (4) Crystal structure or topology illustration Nitrogen Isotherm: No	4	4	TN	TN	TN	TP	TN	TN
10.1021/acs.cgd.6b00463	Main	6	0	0	0	1	0	0	Figures: (4) Nitrogen Isotherm: No	4	4	TN	TN	TN	TP	TN	TN
10.1021/acs.cgd.6b00463	Main	7	0	0	0	1	0	0	Figures: (4) Crystal structure or topology illustration Nitrogen Isotherm: No	4	4	TN	TN	TN	TP	TN	TN
10.1021/acs.cgd.6b00463	Main	8	0	0	0	0	0	1	Figures: (6) It does not have figures or have figures than not belong to above class Nitrogen Isotherm: No	6	6	TN	TN	TN	TN	TN	TP
10.1021/acs.cgd.6b00463	Main	9	0	0	0	0	0	1	Figures: (6) It does not have figures or have figures than not belong to above class Nitrogen Isotherm: No	6	6	TN	TN	TN	TN	TN	TP
10.1021/acs.cgd.6b00463	Main	10	0	0	0	0	0	1	Figures: (6) It does not have figures or have figures than not belong to above class Nitrogen Isotherm: No	6	6	TN	TN	TN	TN	TN	TP
10.1021/acs.cgd.6b00463	Main	11	0	0	0	0	0	1	Figures: (6) It does not have figures or have figures than not belong to above class Nitrogen Isotherm: No	6	6	TN	TN	TN	TN	TN	TP
10.1021/acs.cgd.6b00463	Main	12	0	0	0	0	0	1	Figures: (6) It does not have figures or have figures than not belong to the above class. Nitrogen Isotherm: No	6	6	TN	TN	TN	TN	TN	TP
10.1021/acs.cgd.6b00463	Main	13	0	0	0	0	0	1	Figures: (6) It does not have figures or have figures that not belong to the above class. Nitrogen Isotherm: No.	6	6	TN	TN	TN	TN	TN	TP
10.1021/acs.cgd.6b01265	Supporting Information	1	0	0	0	0	0	1	Figures: (6) It does not have figures or have figures than not belong to above class Nitrogen Isotherm: No	6	6	TN	TN	TN	TN	TN	TP
10.1021/acs.cgd.6b01265	Supporting Information	2	0	0	0	0	0	1	Figures: (6) It does not have figures or have figures than not belong to above class Nitrogen Isotherm: No	6	6	TN	TN	TN	TN	TN	TP
10.1021/acs.cgd.6b01265	Supporting Information	3	0	0	0	0	0	1	Figures: (6) It does not have figures or have figures than not belong to above class Nitrogen Isotherm: No	6	6	TN	TN	TN	TN	TN	TP
10.1021/acs.cgd.6b01265	Supporting Information	4	0	0	0	0	0	1	Figures: (6) It does not have figures or have figures than not belong to above class Nitrogen Isotherm: No	6	6	TN	TN	TN	TN	TN	TP
10.1021/acs.cgd.6b01265	Supporting Information	5	0	0	0	0	0	1	Figures: (6) It does not have figures or have figures than not belong to above class Nitrogen Isotherm: No	6	6	TN	TN	TN	TN	TN	TP
10.1021/acs.cgd.6b01265	Supporting Information	6	0	0	0	0	0	1	Figures: (6) It does not have figures or have figures than not belong to above class Nitrogen Isotherm: No	6	6	TN	TN	TN	TN	TN	TP
10.1021/acs.cgd.6b01265	Supporting Information	7	0	0	0	1	0	0	Figures: (4) Crystal structure or topology illustration Nitrogen Isotherm: No	4	4	TN	TN	TN	TP	TN	TN
10.1021/acs.cgd.6b01265	Supporting Information	8	0	1	0	0	0	0	Figures: (2) Nitrogen Isotherm: No	2	2	TN	TP	TN	TN	TN	TN
10.1021/acs.cgd.6b01265	Supporting Information	9	0	0	1	0	0	0	Figures: (3) Nitrogen Isotherm: No	3	3	TN	TN	TP	TN	TN	TN
10.1021/acs.cgd.6b01265	Supporting Information	10	1	0	0	0	0	0	Figures: (1) Nitrogen Isotherm: Figure S6 (a); Figure S6 (b) Compound: NUU-Bai30, NUU-Bai31 Porosity: N/A Hysteresis: Yes Saturation: - For Figure S6 (a): 400 - 500 cm /g - For Figure S6 (b): 400 - 500 cm /g Position: (0, 0, 1, 1)	1	1	TP	TN	TN	TN	TN	TN
10.1021/acs.cgd.6b01265	Supporting Information	11	0	0	0	0	0	1	Figures: [Answer: (5)]_x000D_ Nitrogen Isotherm: [Answer: Figure S7]_x000D_ Compound: [Answer: NJU-Bai30, NJU-Bai31]_x000D_ Porosity: [Answer: BET = 1814 m??/g for NJU-Bai30, BET = 1861 m??/g for NJU-Bai31]_x000D_ Saturation: [Answer: Approximately 400 - 500 cm??/g]_x000D_ Position: [Answer: (0.05, 0.63, 0.95, 0.95)]_x000D_	6	5	TN	TN	TN	TN	FP	FN
10.1021/acs.cgd.6b01265	Supporting Information	12	0	0	0	0	0	1	Figures: [Answer: (6)]_x000D_ Nitrogen Isotherm: No	6	6	TN	TN	TN	TN	TN	TP
10.1021/acs.cgd.6b01265	Supporting Information	13	0	0	0	0	1	0	Figures: (5) Other gas sorption isotherm Nitrogen Isotherm: No	5	5	TN	TN	TN	TN	TP	TN
10.1021/acs.cgd.6b01265	Supporting Information	14	0	0	0	0	1	0	Figures: (5) Other gas adsorption isotherm (e.g. water vapor, CO2, H2, CH4, etc.) Nitrogen Isotherm: No	5	5	TN	TN	TN	TN	TP	TN
10.1021/acs.cgd.6b01265	Supporting Information	15	0	0	0	0	0	1	Figures: (5) Nitrogen Isotherm: No	6	5	TN	TN	TN	TN	FP	FN
10.1021/acs.cgd.6b01265	Supporting Information	16	0	0	0	0	1	0	Figures: (5) Other gas sorption isotherm (e.g. water vapor, co2, H2, CH4, etc.) Nitrogen Isotherm: No	5	5	TN	TN	TN	TN	TP	TN
10.1021/acs.cgd.6b01265	Supporting Information	17	0	0	0	0	0	1	Figures: (6) It does not have figures or have figures than not belong to above class Nitrogen Isotherm: No	6	6	TN	TN	TN	TN	TN	TP
10.1021/acs.cgd.6b01265	Supporting Information	18	0	0	0	0	0	1	Figures: (6) It does not have figures or have figures than not belong to above class Nitrogen Isotherm: No	6	6	TN	TN	TN	TN	TN	TP
10.1021/acs.cgd.6b01265	Main	1	0	0	0	1	1	0	Figures: (4);(5) Nitrogen Isotherm: No	45	45	TN	TN	TN	TP	TP	TN
10.1021/acs.cgd.6b01265	Main	2	0	0	0	1	1	0	Figures: [Answer: (4);(5)]_x000D_ Nitrogen Isotherm: [Answer: Figure 2]_x000D_ Compound: [Answer: NU-Bai30, NU-Bai31]_x000D_ Porosity: [Answer: Specific value/details]_x000D_ Hysteresis: [Answer: Yes]_x000D_ Saturation: [Answer: 200 - 250 cm??/g]_x000D_ Position: [Answer: (0.54, 0.56, 0.96, 0.88)]	45	45	TN	TN	TN	TP	TP	TN
10.1021/acs.cgd.6b01265	Main	3	0	0	0	0	0	1	Figures: (6) It does not have figures or have figures than not belong to above class Nitrogen Isotherm: No	6	6	TN	TN	TN	TN	TN	TP
10.1021/acs.cgd.6b01265	Main	4	0	0	0	0	0	1	Figures: [Answer: (6) It does not have figures or have figures than not belong to above class] Nitrogen Isotherm: No	6	6	TN	TN	TN	TN	TN	TP
10.1021/acs.chemmater.5b03723	Supporting Information	1	0	0	0	0	0	1	Figures: (6) It does not have figures or have figures than not belong to above class_x000D_ Nitrogen Isotherm: No	6	6	TN	TN	TN	TN	TN	TP
10.1021/acs.chemmater.5b03723	Supporting Information	2	0	0	0	0	0	1	Figures: [Answer: (6) It does not have figures or have figures that not belong to above class] Nitrogen Isotherm: No	6	6	TN	TN	TN	TN	TN	TP
10.1021/acs.chemmater.5b03723	Supporting Information	3	0	0	0	0	0	1	Figures: (6) It does not have figures or have figures than not belong to above class Nitrogen Isotherm: No	6	6	TN	TN	TN	TN	TN	TP
10.1021/acs.chemmater.5b03723	Supporting Information	4	0	0	0	0	0	1	Figures: (6) It does not have figures or have figures than not belong to above class Nitrogen Isotherm: No	6	6	TN	TN	TN	TN	TN	TP
10.1021/acs.chemmater.5b03723	Supporting Information	5	0	0	0	0	0	1	Figures: (6) It does not have figures or have figures than not belong to above class Nitrogen Isotherm: No	6	6	TN	TN	TN	TN	TN	TP
10.1021/acs.chemmater.5b03723	Supporting Information	6	0	0	0	0	0	1	Figures: (6) It does not have figures or have figures that do not belong to the above class Nitrogen Isotherm: No	6	6	TN	TN	TN	TN	TN	TP
10.1021/acs.chemmater.5b03723	Supporting Information	7	0	0	0	0	0	1	Figures: (6) It does not have figures or have figures than not belong to above class Nitrogen Isotherm: No	6	6	TN	TN	TN	TN	TN	TP
10.1021/acs.chemmater.5b03723	Supporting Information	8	0	0	0	0	0	1	Figures: [Answer: (6) It does not have figures or have figures than not belong to above class] Nitrogen Isotherm: No	6	6	TN	TN	TN	TN	TN	TP
10.1021/acs.chemmater.5b03723	Supporting Information	9	0	0	0	0	0	1	Figures: [Answer: (6)] Nitrogen Isotherm: No	6	6	TN	TN	TN	TN	TN	TP
10.1021/acs.chemmater.5b03723	Supporting Information	10	0	0	0	0	0	1	Figures: (6) It does not have figures or have figures than not belong to above class Nitrogen Isotherm: No	6	6	TN	TN	TN	TN	TN	TP
10.1021/acs.chemmater.5b03723	Supporting Information	11	0	0	0	0	0	1	Figures: [Answer: (6) It does not have figures or have figures than not belong to the above class] Nitrogen Isotherm: No	6	6	TN	TN	TN	TN	TN	TP
10.1021/acs.chemmater.5b03723	Supporting Information	12	0	0	0	0	0	1	Figures: (6) It does not have figures or have figures than not belong to above class Nitrogen Isotherm: No	6	6	TN	TN	TN	TN	TN	TP
10.1021/acs.chemmater.5b03723	Supporting Information	13	0	0	0	0	0	1	Figures: (6) It does not have figures or have figures than not belong to above class Nitrogen Isotherm: No	6	6	TN	TN	TN	TN	TN	TP
10.1021/acs.chemmater.5b03723	Supporting Information	14	0	0	0	0	0	1	Figures: (6) It does not have figures or have figures than not belong to above class Nitrogen Isotherm: No	6	6	TN	TN	TN	TN	TN	TP
10.1021/acs.chemmater.5b03723	Supporting Information	15	0	0	0	0	0	1	Figures: (6) It does not have figures or have figures than not belong to above class Nitrogen Isotherm: No	6	6	TN	TN	TN	TN	TN	TP
10.1021/acs.chemmater.5b03723	Supporting Information	16	0	0	0	0	0	1	Figures: [Answer: (6) It does not have figures or have figures that not belong to above class] Nitrogen Isotherm: No	6	6	TN	TN	TN	TN	TN	TP
10.1021/acs.chemmater.5b03723	Supporting Information	17	0	0	0	0	0	1	Figures: (6) It does not have figures or have figures than not belong to above class_x000D_ Nitrogen Isotherm: No	6	6	TN	TN	TN	TN	TN	TP
10.1021/acs.chemmater.5b03723	Supporting Information	18	0	0	0	0	0	1	Figures: (6) It does not have figures or have figures than not belong to above class_x000D_ Nitrogen Isotherm: No	6	6	TN	TN	TN	TN	TN	TP
10.1021/acs.chemmater.5b03723	Supporting Information	19	0	0	0	0	0	1	Figures: [Answer: (6) It does not have figures or have figures than not belong to above class]_x000D_ Nitrogen Isotherm: No	6	6	TN	TN	TN	TN	TN	TP
10.1021/acs.chemmater.5b03723	Supporting Information	20	1	0	0	0	0	0	Figures: (1)_x000D_ Nitrogen Isotherm: Figure S8_x000D_ Compound: UHM-25-Ala-Boc (11)_x000D_ Porosity: S_BET = 1474 m^2 g^-1; V_micropore = 0.58 cm^3 g^-1_x000D_ Hysteresis: Yes_x000D_ Saturation: 300 - 400 cm^3/g_x000D_ Position: (0,0.5,1,0.85)	1	1	TP	TN	TN	TN	TN	TN
10.1021/acs.chemmater.5b03723	Supporting Information	21	0	0	1	1	0	0	Figures: (3);(4)_x000D_ Nitrogen Isotherm: No	34	34	TN	TN	TP	TP	TN	TN
10.1021/acs.chemmater.5b03723	Supporting Information	22	0	0	0	0	0	1	Figures: (6) It does not have figures or have figures that do not belong to the above class._x000D_ Nitrogen Isotherm: No	6	6	TN	TN	TN	TN	TN	TP
10.1021/acs.chemmater.5b03723	Supporting Information	23	1	0	0	0	0	0	Figures: (1);(2) Nitrogen Isotherm: Figure S12 Compound: UHM-25-Val-Boc (12) Porosity: N/A Hysteresis: Yes Saturation: 600 - 700 cm^3/g Position: (0.0,0.5,1.0,1.0)	1	12	TP	FP	TN	TN	TN	TN
10.1021/acs.chemmater.5b03723	Supporting Information	24	0	0	1	0	0	0	Figures: (3) Nitrogen Isotherm: Figure S13 Compound: UHM-25-Val-Boc (12) Porosity: S_BET = 1922 m^2 g^ 1; V_micropore = 1.00 cm^3 g^ 1 Hysteresis: Yes Saturation: 60 - 80 cm^3/g Position: (0.05, 0.3, 0.95, 0.7)	3	3	TN	TN	TP	TN	TN	TN
10.1021/acs.chemmater.5b03723	Supporting Information	25	1	0	0	0	0	0	Figures: (1) Nitrogen Isotherm: Figure S14 Compound: UHM-25-Leu-Boc (13) Porosity: S_BET = 1474 m^2 g^-1; V_micropore = 0.68 cm^3 g^-1 Hysteresis: Yes Saturation: 500 - 600 cm^3/g Position: (0, 0.1, 1, 0.7)	1	1	TP	TN	TN	TN	TN	TN
10.1021/acs.chemmater.5b03723	Supporting Information	26	0	0	1	0	0	0	Figures: (3) Nitrogen Isotherm: Figure S15 Compound: UHM-25-Leu-Boc (13) Porosity: N/A Hysteresis: Yes Saturation: I do not know Position: (0,0.1,0.8,0.6)	3	3	TN	TN	TP	TN	TN	TN
10.1021/acs.chemmater.5b03723	Supporting Information	27	1	0	0	0	0	0	Figures: (1) Nitrogen Isotherm: Figure S16 Compound: UHM-25-Ala (14) Porosity: S_BET = 975.7 m^2 g^-1; V_micropore = 0.39 cm^3 g^-1 Hysteresis: No Saturation: 275 - 300 cm^3/g Position: (0,0.2,1,0.8)	1	1	TP	TN	TN	TN	TN	TN
10.1021/acs.chemmater.5b03723	Supporting Information	28	0	0	1	0	0	0	Figures: (3) Nitrogen Isotherm: No	3	3	TN	TN	TP	TN	TN	TN
10.1021/acs.chemmater.5b03723	Supporting Information	29	1	0	0	0	0	0	Figures: (1) Nitrogen Isotherm: Figure S18 Compound: UHM-25-Val (15) Porosity: S_BET = 1286 m^2 g^-1 (determined for p/ p0 = 0.011 0.049), V_micropore = 0.51 cm^3 g^-1 (determined at p/p0 = 0.20) Hysteresis: Yes Saturation: 300 - 400 cm^3/g Position: (0,0,1,1)	1	1	TP	TN	TN	TN	TN	TN
10.1021/acs.chemmater.5b03723	Supporting Information	30	0	0	1	0	0	0	Figures: (3);(5) Nitrogen Isotherm: No Compound: N/A Porosity: N/A Hysteresis: N/A Saturation: N/A Position: N/A	3	35	TN	TN	TP	TN	FP	TN
10.1021/acs.chemmater.5b03723	Supporting Information	31	1	0	0	0	0	0	Figures: (1) Nitrogen Isotherm: Figure S20 Compound: UHM-25-Leu (16) Porosity: S_BET = 1351 m^2 g^-1, V_micropore = 0.53 cm^3 g^-1 Hysteresis: No Saturation: 300 - 400 cm^3/g Position: (0,0.1,1,0.7)	1	1	TP	TN	TN	TN	TN	TN
10.1021/acs.chemmater.5b03723	Supporting Information	32	0	0	1	0	0	0	Figures: (3) Nitrogen Isotherm: Figure S21 Compound: UHM-25-Leu(16) Porosity: N/A Hysteresis: I do not know Saturation: I do not know Position: (0, 0.1, 0.7, 0.6)	3	3	TN	TN	TP	TN	TN	TN
10.1021/acs.chemmater.5b03723	Supporting Information	33	1	0	0	0	0	0	Figures: (1) Nitrogen Isotherm: Figure S22 Compound: UHM-25-Pro (17) Porosity: S_BET = 371.5 m^2 g^-1; V_micropore = 0.15 cm^3 g^-1 Hysteresis: Yes Saturation: 90 - 100 cm^3/g Position: (0,0.1,1,0.75)	1	1	TP	TN	TN	TN	TN	TN
10.1021/acs.chemmater.5b03723	Supporting Information	34	0	0	1	0	0	0	Figures: (3) Nitrogen Isotherm: No	3	3	TN	TN	TP	TN	TN	TN
10.1021/acs.chemmater.5b03723	Supporting Information	35	0	0	0	1	0	0	Figures: (4) Crystal structure or topology illustration Nitrogen Isotherm: No	4	4	TN	TN	TN	TP	TN	TN
10.1021/acs.chemmater.5b03723	Supporting Information	36	1	0	0	0	0	0	Figures: (1) Nitrogen Isotherm: Figure S25 Compound: UHM-25-Val-Evans (18) Porosity: SBET = 1454 m^2 g^-1; Vmicropore = 0.56 cm^3 g^-1 Hysteresis: Yes Saturation: 300 - 400 cm^3/g Position: (0.1, 0.4, 0.9, 0.9)	1	1	TP	TN	TN	TN	TN	TN
10.1021/acs.chemmater.5b03723	Supporting Information	37	0	0	1	0	0	0	Figures: (3) Nitrogen Isotherm: No	3	3	TN	TN	TP	TN	TN	TN
10.1021/acs.chemmater.5b03723	Supporting Information	38	0	0	0	0	0	1	Figures: (6) It does not have figures or have figures than not belong to above class Nitrogen Isotherm: No	6	6	TN	TN	TN	TN	TN	TP
10.1021/acs.chemmater.5b03723	Supporting Information	39	0	1	0	0	0	0	Figures: (2) Nitrogen Isotherm: No	2	2	TN	TP	TN	TN	TN	TN
10.1021/acs.chemmater.5b03723	Main	1	0	0	0	1	0	0	Figures: (6) It does not have figures or have figures than not belong to above class Nitrogen Isotherm: No	4	6	TN	TN	TN	FN	TN	FP
10.1021/acs.chemmater.5b03723	Main	2	0	0	0	0	0	1	Figures: (6) It does not have figures or have figures than not belong to above class Nitrogen Isotherm: No	6	6	TN	TN	TN	TN	TN	TP
10.1021/acs.chemmater.5b03723	Main	3	0	0	0	0	0	1	Figures: (2);(4) Nitrogen Isotherm: No	6	24	TN	FP	TN	FP	TN	FN
10.1021/acs.chemmater.5b03723	Main	4	0	0	0	1	0	0	Figures: (4) Crystal structure or topology illustration Nitrogen Isotherm: No	4	4	TN	TN	TN	TP	TN	TN
10.1021/acs.chemmater.5b03723	Main	5	1	0	0	1	0	0	Figures: (1);(4) Nitrogen Isotherm: Figure 7 Compound: UHM-2S-Val-Boc Porosity: N/A Hysteresis: Yes Saturation: 700 - 800 cm^3/g Position: (0.1, 0.6, 0.9, 1.0)	14	14	TP	TN	TN	TP	TN	TN
10.1021/acs.chemmater.5b03723	Main	6	0	0	0	0	0	1	Figures: (6) It does not have figures or have figures than not belong to above class Nitrogen Isotherm: No	6	6	TN	TN	TN	TN	TN	TP
10.1021/acs.chemmater.5b03723	Main	7	0	0	0	0	0	1	Figures: (6) It does not have figures or have figures that not belong to the above class Nitrogen Isotherm: No	6	6	TN	TN	TN	TN	TN	TP
10.1021/acs.chemmater.5b03723	Main	8	0	0	0	0	0	1	Figures: (6) It does not have figures or have figures than not belong to above class Nitrogen Isotherm: No	6	6	TN	TN	TN	TN	TN	TP
10.1021/acs.chemmater.5b03723	Main	9	0	0	0	0	0	1	Figures: [Answer: (6) It does not have figures or have figures than not belong to above class] Nitrogen Isotherm: No	6	6	TN	TN	TN	TN	TN	TP
10.1021/acs.chemmater.5b03723	Main	10	0	0	0	0	0	1	Figures: (6) It does not have figures or have figures that do not belong to the above class Nitrogen Isotherm: No	6	6	TN	TN	TN	TN	TN	TP
10.1021/acs.chemmater.6b02817	Supporting Information	1	0	0	0	0	0	1	Figures: [Answer: (6) It does not have figures or have figures than not belong to above class] Nitrogen Isotherm: No	6	6	TN	TN	TN	TN	TN	TP
10.1021/acs.chemmater.6b02817	Supporting Information	2	0	0	0	0	0	1	Figures: (6) It does not have figures or have figures that do not belong to the above class. Nitrogen Isotherm: No	6	6	TN	TN	TN	TN	TN	TP
10.1021/acs.chemmater.6b02817	Supporting Information	3	0	0	0	0	0	1	Figures: (6) It does not have figures or have figures than not belong to above class Nitrogen Isotherm: No	6	6	TN	TN	TN	TN	TN	TP
10.1021/acs.chemmater.6b02817	Supporting Information	4	0	0	0	0	0	1	Figures: (6) It does not have figures or have figures than not belong to above class Nitrogen Isotherm: No	6	6	TN	TN	TN	TN	TN	TP
10.1021/acs.chemmater.6b02817	Supporting Information	5	0	0	0	0	0	1	Figures: (6) It does not have figures or have figures than not belong to above class Nitrogen Isotherm: No	6	6	TN	TN	TN	TN	TN	TP
10.1021/acs.chemmater.6b02817	Supporting Information	6	0	0	0	0	0	1	Figures: [Answer: (6) It does not have figures or have figures than not belong to above class] Nitrogen Isotherm: No	6	6	TN	TN	TN	TN	TN	TP
10.1021/acs.chemmater.6b02817	Supporting Information	7	0	0	0	0	0	1	Figures: (6) It does not have figures or have figures than not belong to above class Nitrogen Isotherm: No	6	6	TN	TN	TN	TN	TN	TP
10.1021/acs.chemmater.6b02817	Supporting Information	8	0	0	0	0	0	1	Figures: [Answer: (6) It does not have figures or have figures than not belong to above class] Nitrogen Isotherm: No	6	6	TN	TN	TN	TN	TN	TP
10.1021/acs.chemmater.6b02817	Supporting Information	9	0	0	0	0	0	1	Figures: (6) It does not have figures or have figures than not belong to above class Nitrogen Isotherm: No	6	6	TN	TN	TN	TN	TN	TP
10.1021/acs.chemmater.6b02817	Supporting Information	10	0	0	0	1	0	0	Figures: (4) Crystal structure or topology illustration Nitrogen Isotherm: No	4	4	TN	TN	TN	TP	TN	TN
10.1021/acs.chemmater.6b02817	Supporting Information	11	0	0	0	1	0	0	Figures: (4) Crystal structure or topology illustration Nitrogen Isotherm: No	4	4	TN	TN	TN	TP	TN	TN
10.1021/acs.chemmater.6b02817	Supporting Information	12	0	1	0	0	0	0	Figures: (2) Nitrogen Isotherm: No	2	2	TN	TP	TN	TN	TN	TN
10.1021/acs.chemmater.6b02817	Supporting Information	13	0	1	0	0	0	0	Figures: (2) Nitrogen Isotherm: No	2	2	TN	TP	TN	TN	TN	TN
10.1021/acs.chemmater.6b02817	Supporting Information	14	0	1	0	0	0	0	Figures: (2) Nitrogen Isotherm: No	2	2	TN	TP	TN	TN	TN	TN
10.1021/acs.chemmater.6b02817	Supporting Information	15	0	1	0	0	0	0	Figures: (2) Nitrogen Isotherm: No	2	2	TN	TP	TN	TN	TN	TN
10.1021/acs.chemmater.6b02817	Supporting Information	16	0	0	1	0	0	0	Figures: (3) Nitrogen Isotherm: No	3	3	TN	TN	TP	TN	TN	TN
10.1021/acs.chemmater.6b02817	Supporting Information	17	0	0	1	0	0	0	Figures: (3) Nitrogen Isotherm: No	3	3	TN	TN	TP	TN	TN	TN
10.1021/acs.chemmater.6b02817	Supporting Information	18	0	0	0	0	0	1	Figures: (6) It does not have figures or have figures that do not belong to the above class Nitrogen Isotherm: No	6	6	TN	TN	TN	TN	TN	TP
10.1021/acs.chemmater.6b02817	Supporting Information	19	1	0	0	0	1	0	Figures: (1);(5) Nitrogen Isotherm: Figure S9(a) Compound: Fe-soc-MOF-1a Porosity: N/A Saturation: 300 - 400 cm /g Position: (0,0,0.5,0.5)	15	15	TP	TN	TN	TN	TP	TN
10.1021/acs.chemmater.6b02817	Supporting Information	20	1	0	0	0	1	0	Figures: (5) Nitrogen Isotherm: (a) Compound: Fe-sco-MOF-1a Porosity: N/A Hysteresis: Yes Saturation: 500 - 600 cm /g Position: (0,0,0.5,0.45)	15	5	FN	TN	TN	TN	TP	TN
10.1021/acs.chemmater.6b02817	Supporting Information	21	1	0	0	0	1	0	Figures: (1);(5) Nitrogen Isotherm: Figure S11 (a) Compound: Fe-soc-MOF-1b Porosity: N/A Hysteresis: Yes Saturation: 250 - 300 cm3/g Position: (0, 0, 0.5, 0.6)	15	15	TP	TN	TN	TN	TP	TN
10.1021/acs.chemmater.6b02817	Supporting Information	22	1	0	0	0	1	0	Figures: (1);(5) Nitrogen Isotherm: (a) Compound: Fe-soc-MOF-1b Porosity: N/A Hysteresis: No Saturation: 450 - 500 cm3/g Position: (0,0,0.5,0.6)	15	15	TP	TN	TN	TN	TP	TN
10.1021/acs.chemmater.6b02817	Supporting Information	23	1	0	0	0	1	0	Figures: (1);(5) Nitrogen Isotherm: No Compound: N/A Porosity: N/A Hysteresis: N/A Saturation: N/A Position: N/A	15	15	TP	TN	TN	TN	TP	TN
10.1021/acs.chemmater.6b02817	Supporting Information	24	1	0	0	0	1	0	Figures: (1);(5)_x000D_ Nitrogen Isotherm: Figure S14 (a)_x000D_ Compound: In-soc-MOF-1c_x000D_ Porosity: N/A_x000D_ Hysteresis: Yes_x000D_ Saturation: 300 - 400 cm3/g_x000D_ Position: (0,0,0.5,0.5)	15	15	TP	TN	TN	TN	TP	TN
10.1021/acs.chemmater.6b02817	Supporting Information	25	0	0	0	0	0	1	Figures: (6) It does not have figures or have figures than not belong to above class_x000D_ Nitrogen Isotherm: No	6	6	TN	TN	TN	TN	TN	TP
10.1021/acs.chemmater.6b02817	Supporting Information	26	0	0	0	0	0	1	Figures: (5)_x000D_ Nitrogen Isotherm: Figure S15_x000D_ Compound: Fe-soc-MOF-1a, In-soc-MOF-1b_x000D_ Porosity: N/A_x000D_ Hysteresis: I do not know_x000D_ Saturation: 15 - 20_x000D_ Position: (0,0.2,1,0.8)	6	5	TN	TN	TN	TN	FP	FN
10.1021/acs.chemmater.6b02817	Supporting Information	27	0	0	0	0	1	0	Figures: (5)_x000D_ Nitrogen Isotherm: No	5	5	TN	TN	TN	TN	TP	TN
10.1021/acs.chemmater.6b02817	Supporting Information	28	0	0	0	0	0	1	Figures: (6) It does not have figures or have figures than not belong to above class_x000D_ Nitrogen Isotherm: No	6	6	TN	TN	TN	TN	TN	TP
10.1021/acs.chemmater.6b02817	Supporting Information	29	0	0	0	0	0	1	Figures: (6) It does not have figures or have figures that do not belong to the above class._x000D_ Nitrogen Isotherm: No	6	6	TN	TN	TN	TN	TN	TP
10.1021/acs.chemmater.6b02817	Supporting Information	30	0	0	0	0	0	1	Figures: (6) It does not have figures or have figures than not belong to above class_x000D_ Nitrogen Isotherm: No	6	6	TN	TN	TN	TN	TN	TP
10.1021/acs.chemmater.6b02817	Supporting Information	31	0	0	0	0	0	1	Figures: (6) It does not have figures or have figures than not belong to above class_x000D_ Nitrogen Isotherm: No	6	6	TN	TN	TN	TN	TN	TP
10.1021/acs.chemmater.6b02817	Supporting Information	32	0	0	0	0	0	1	Figures: (6) It does not have figures or have figures than not belong to above class_x000D_ Nitrogen Isotherm: No	6	6	TN	TN	TN	TN	TN	TP
10.1021/acs.chemmater.6b02817	Supporting Information	33	0	0	0	0	0	1	Figures: (6) It does not have figures or have figures than not belong to above class Nitrogen Isotherm: No	6	6	TN	TN	TN	TN	TN	TP
10.1021/acs.chemmater.6b02817	Main	1	0	0	0	1	0	0	Figures: (6) It does not have figures or have figures than not belong to above class Nitrogen Isotherm: No	4	6	TN	TN	TN	FN	TN	FP
10.1021/acs.chemmater.6b02817	Main	2	0	0	0	0	0	1	Figures: (6) It does not have figures or have figures than not belong to above class Nitrogen Isotherm: No	6	6	TN	TN	TN	TN	TN	TP
10.1021/acs.chemmater.6b02817	Main	3	0	0	0	1	0	0	Figures: (4) Nitrogen Isotherm: No	4	4	TN	TN	TN	TP	TN	TN
10.1021/acs.chemmater.6b02817	Main	4	0	0	0	0	1	0	Figures: (5) Nitrogen Isotherm: Figure 3a Compound: In-soc-MOF-1a, Fe-soc-MOF-1a, In-soc-MOF-1b, Fe-soc-MOF-1b, In-soc-MOF-1c Porosity: Surface areas measured to be 1700 and 2060 m^2/g, respectively (Table S1). Hysteresis: No Saturation: 2.0 - 2.5 wt % Position: (0,0.5,0.75,0.9)	5	5	TN	TN	TN	TN	TP	TN
10.1021/acs.chemmater.6b02817	Main	5	0	0	0	0	1	0	Figures: (5) Nitrogen Isotherm: No	5	5	TN	TN	TN	TN	TP	TN
10.1021/acs.chemmater.6b02817	Main	6	0	0	0	0	0	1	Figures: (5) Nitrogen Isotherm: No	6	5	TN	TN	TN	TN	FP	FN
10.1021/acs.chemmater.6b02817	Main	7	0	0	0	0	0	1	Figures: (6) It does not have figures or have figures than not belong to above class Nitrogen Isotherm: No	6	6	TN	TN	TN	TN	TN	TP
10.1021/acs.chemmater.6b02817	Main	8	0	0	0	0	0	1	Figures: (6) It does not have figures or have figures than not belong to above class Nitrogen Isotherm: No	6	6	TN	TN	TN	TN	TN	TP
10.1021/acs.chemmater.6b02817	Main	9	0	0	0	0	0	1	Figures: (6) It does not have figures or have figures than not belong to the above class. Nitrogen Isotherm: No.	6	6	TN	TN	TN	TN	TN	TP
10.1021/acs.inorgchem.5b00096	Supporting Information	1	0	0	0	0	0	1	Figures: [Answer: (6) It does not have figures or have figures than not belong to above class] Nitrogen Isotherm: No	6	6	TN	TN	TN	TN	TN	TP
10.1021/acs.inorgchem.5b00096	Supporting Information	2	0	0	0	0	0	1	Figures: (6) It does not have figures or have figures that not belong to the above class Nitrogen Isotherm: No	6	6	TN	TN	TN	TN	TN	TP
10.1021/acs.inorgchem.5b00096	Supporting Information	3	0	0	0	0	0	1	Figures: (6) It does not have figures or have figures than not belong to above class Nitrogen Isotherm: No	6	6	TN	TN	TN	TN	TN	TP
10.1021/acs.inorgchem.5b00096	Supporting Information	4	0	0	0	0	0	1	Figures: [Answer: (6) It does not have figures or have figures than not belong to above class] Nitrogen Isotherm: No	6	6	TN	TN	TN	TN	TN	TP
10.1021/acs.inorgchem.5b00096	Supporting Information	5	0	0	0	0	0	1	Figures: (6) It does not have figures or have figures than not belong to above class Nitrogen Isotherm: No	6	6	TN	TN	TN	TN	TN	TP
10.1021/acs.inorgchem.5b00096	Supporting Information	6	0	0	0	1	0	0	Figures: (4) Nitrogen Isotherm: No	4	4	TN	TN	TN	TP	TN	TN
10.1021/acs.inorgchem.5b00096	Supporting Information	7	0	0	0	1	0	0	Figures: (4) Crystal structure or topology illustration Nitrogen Isotherm: No	4	4	TN	TN	TN	TP	TN	TN
10.1021/acs.inorgchem.5b00096	Supporting Information	8	0	0	0	1	0	0	Figures: (4) Crystal structure or topology illustration Nitrogen Isotherm: No	4	4	TN	TN	TN	TP	TN	TN
10.1021/acs.inorgchem.5b00096	Supporting Information	9	0	0	0	1	0	0	Figures: (4) Crystal structure or topology illustration Nitrogen Isotherm: No	4	4	TN	TN	TN	TP	TN	TN
10.1021/acs.inorgchem.5b00096	Supporting Information	10	0	0	0	1	0	0	Figures: (4) Nitrogen Isotherm: No	4	4	TN	TN	TN	TP	TN	TN
10.1021/acs.inorgchem.5b00096	Supporting Information	11	0	0	0	1	0	0	Figures: (4) Nitrogen Isotherm: No	4	4	TN	TN	TN	TP	TN	TN
10.1021/acs.inorgchem.5b00096	Supporting Information	12	0	0	0	1	0	0	Figures: (4) Nitrogen Isotherm: No	4	4	TN	TN	TN	TP	TN	TN
10.1021/acs.inorgchem.5b00096	Supporting Information	13	0	0	0	0	0	1	Figures: (6) It does not have figures or have figures than not belong to above class Nitrogen Isotherm: No	6	6	TN	TN	TN	TN	TN	TP
10.1021/acs.inorgchem.5b00096	Supporting Information	14	0	1	0	0	0	0	Figures: (2) Nitrogen Isotherm: No	2	2	TN	TP	TN	TN	TN	TN
10.1021/acs.inorgchem.5b00096	Supporting Information	15	0	1	0	0	0	0	Figures: (2) Nitrogen Isotherm: No	2	2	TN	TP	TN	TN	TN	TN
10.1021/acs.inorgchem.5b00096	Supporting Information	16	0	1	0	0	0	0	Figures: (2) PXRD pattern Nitrogen Isotherm: No	2	2	TN	TP	TN	TN	TN	TN
10.1021/acs.inorgchem.5b00096	Supporting Information	17	0	1	0	0	0	0	Figures: (2) Nitrogen Isotherm: No	2	2	TN	TP	TN	TN	TN	TN
10.1021/acs.inorgchem.5b00096	Supporting Information	18	0	1	0	0	0	0	Figures: (2) Nitrogen Isotherm: No	2	2	TN	TP	TN	TN	TN	TN
10.1021/acs.inorgchem.5b00096	Supporting Information	19	0	1	0	0	0	0	Figures: (2) Nitrogen Isotherm: No	2	2	TN	TP	TN	TN	TN	TN
10.1021/acs.inorgchem.5b00096	Supporting Information	20	0	1	0	0	0	0	Figures: (2) Nitrogen Isotherm: No	2	2	TN	TP	TN	TN	TN	TN
10.1021/acs.inorgchem.5b00096	Supporting Information	21	0	1	0	0	0	0	Figures: (2) Nitrogen Isotherm: No	2	2	TN	TP	TN	TN	TN	TN
10.1021/acs.inorgchem.5b00096	Supporting Information	22	0	0	0	0	0	1	Figures: [Answer: (6) It does not have figures or have figures than not belong to above class] Nitrogen Isotherm: No	6	6	TN	TN	TN	TN	TN	TP
10.1021/acs.inorgchem.5b00096	Supporting Information	23	0	0	0	0	0	1	Figures: [Answer: (6)] Nitrogen Isotherm: No	6	6	TN	TN	TN	TN	TN	TP
10.1021/acs.inorgchem.5b00096	Supporting Information	24	0	1	0	0	0	0	Figures: (2) Nitrogen Isotherm: No	2	2	TN	TP	TN	TN	TN	TN
10.1021/acs.inorgchem.5b00096	Supporting Information	25	1	0	0	0	0	0	Figures: (1)_x000D_ Nitrogen Isotherm: Figure S17_x000D_ Compound: 1-(CuCl2)5.8, 1-(CuCl6)8, 1-(CoCl2)5.5, 1-(FeBr2)6.1, 1-(Cr(CO)4)5.6_x000D_ Porosity: N/A_x000D_ Hysteresis: I do not know_x000D_ Saturation: 20 - 30 mmol/g_x000D_ Position: (0,0,1,0.9)	1	1	TP	TN	TN	TN	TN	TN
10.1021/acs.inorgchem.5b00096	Supporting Information	26	0	0	0	0	0	1	Figures: [Answer: (5)]_x000D_ Nitrogen Isotherm: No_x000D_ _x000D_ Based on the content of the image, the answers to your questions are as follows:_x000D_ _x000D_ 1. The image contains a plot that is not a nitrogen isotherm, PXRD pattern, TGA curve, or a crystal structure/topology illustration. It looks like another type of gas sorption isotherm or related plot._x000D_ _x000D_ 2. Since the figure…	6	5	TN	TN	TN	TN	FP	FN
10.1021/acs.inorgchem.5b00096	Supporting Information	27	0	0	0	0	0	1	Figures: [Answer: (5) Other gas sorption isotherm]_x000D_ Nitrogen Isotherm: No_x000D_ Compound: N/A_x000D_ Porosity: [Answer: Saturation capacity of 28.0 mmol/g and a BET surface area of 2730 m??/g]_x000D_ Hysteresis: I do not know_x000D_ Saturation: I do not know_x000D_ Position: [Answer: (0.05, 0.77, 0.95, 0.95)]	6	5	TN	TN	TN	TN	FP	FN
10.1021/acs.inorgchem.5b00096	Supporting Information	28	0	0	0	0	0	1	Figures: [Answer: (5)]_x000D_ Nitrogen Isotherm: No_x000D_ _x000D_ The provided image appears to display a plot related to gas sorption isotherm, but it is not a nitrogen isotherm; it is another type of gas sorption isotherm.	6	5	TN	TN	TN	TN	FP	FN
10.1021/acs.inorgchem.5b00096	Supporting Information	29	0	0	0	0	0	1	Figures: (5) Nitrogen Isotherm: Figure S21 Compound: N/A Porosity: The saturation capacity is 26.9 mmol/g and a BET surface area of 2625 m /g. Hysteresis: I do not know Saturation: 0.0006 - 0.0008 Position: (0, 0.3, 1, 1)	6	5	TN	TN	TN	TN	FP	FN
10.1021/acs.inorgchem.5b00096	Supporting Information	30	0	0	0	0	0	1	Figures: [Answer: (5)]_x000D_ Nitrogen Isotherm: [Answer: No]_x000D_ Compound: [Answer: N/A]_x000D_ Porosity: [Answer: N/A]_x000D_ Hysteresis: [Answer: N/A]_x000D_ Saturation: [Answer: N/A]_x000D_ Position: [Answer: N/A]	6	5	TN	TN	TN	TN	FP	FN
10.1021/acs.inorgchem.5b00096	Supporting Information	31	0	0	0	0	0	1	Figures: [Answer: (5)]_x000D_ Nitrogen Isotherm: No_x000D_ _x000D_ Based on the image you've provided and the instructions, the image contains a graph which is a plot of \( p/p_0(1/(1-p/p_0)) \) vs. \( p/p_0 \) for \( 1^{st}Cu(Cl_xBr_{1-x})_2 \) to determine the BET surface area, which classifies as "Other gas sorption isotherm" but not specifically a nitrogen isotherm. Therefore, no nitrogen iso…	6	5	TN	TN	TN	TN	FP	FN
10.1021/acs.inorgchem.5b00096	Supporting Information	32	0	0	0	0	0	1	The image provided appears to be a graph that is likely part of the supplementary material of an academic paper, given the "S" in the figure number (Figure S24). The graph itself is a plot of n(1-p/p0) vs. p/p0, which is indicative of a gas adsorption isotherm. The graph looks like it is part of the Brunauer-Emmett-Teller (BET) analysis, a method commonly used to determine specific surface area f…	6	5	TN	TN	TN	TN	FP	FN
10.1021/acs.inorgchem.5b00096	Supporting Information	33	0	0	0	0	0	1	Figures: (5) Nitrogen Isotherm: Figure S25 Compound: 1-{CuCl6} Porosity: Surface area of 701 m^2/g, saturation capacity of 7.2 mmol/g Hysteresis: No Saturation: 0.006 - 0.008 Position: (0,0.25,1,1)	6	5	TN	TN	TN	TN	FP	FN
10.1021/acs.inorgchem.5b00096	Supporting Information	34	0	0	0	0	0	1	The provided image contains a plot that appears to be related to gas adsorption isotherms, commonly used to characterize materials like metal-organic frameworks (MOFs) in terms of their gas uptake and surface properties._x000D_ _x000D_ Figures: [Answer: (5)]_x000D_ Nitrogen Isotherm: No_x000D_ _x000D_ The plot shows n(1-p/p0) versus p/p0 for a compound, but it does not fit the typical shape of a …	6	5	TN	TN	TN	TN	FP	FN
10.1021/acs.inorgchem.5b00096	Supporting Information	35	0	0	0	0	0	1	Figures: [Answer: (5)]_x000D_ Nitrogen Isotherm: No	6	5	TN	TN	TN	TN	FP	FN
10.1021/acs.inorgchem.5b00096	Supporting Information	36	0	0	0	0	0	1	Figures: [Answer: (5)]_x000D_ Nitrogen Isotherm: No	6	5	TN	TN	TN	TN	FP	FN
10.1021/acs.inorgchem.5b00096	Supporting Information	37	0	0	0	0	0	1	Figures: [Answer: (5)]_x000D_ Nitrogen Isotherm: [Answer: Figure S29]_x000D_ Compound: [Answer: 1-[Fe(BTC)(H2O)2]???(DMF)6???(H2O)2]_x000D_ Porosity: [Answer: Surface area of 971 m??/g; saturation capacity of 10.0 mmol/g]_x000D_ Hysteresis: [Answer: No]_x000D_ Saturation: [Answer: I do not know]_x000D_ Position: [Answer: (0.05, 0.65, 0.95, 0.95)]	6	5	TN	TN	TN	TN	FP	FN
10.1021/acs.inorgchem.5b00096	Supporting Information	38	0	0	0	0	0	1	Figures: (5) Nitrogen Isotherm: Figure S30 Compound: 1*(Cr(CO)4)3.5 Porosity: N/A Hysteresis: No Saturation: 8 - 10 Position: (0,0.7,1,1)	6	5	TN	TN	TN	TN	FP	FN
10.1021/acs.inorgchem.5b00096	Supporting Information	39	0	0	0	0	0	1	Figures: (5) Nitrogen Isotherm: Figure S31 Compound: 1-(Cr(CO3)0.5)6 Porosity: Surface area of 934 m /g and a saturation capacity of 9.6 mmol/g Hysteresis: No Saturation: Approximately 0.002 - 0.0025 p/p Position: (0, 0.2, 1, 1)	6	5	TN	TN	TN	TN	FP	FN
10.1021/acs.inorgchem.5b00096	Supporting Information	40	0	0	1	0	0	0	Figures: (3) Nitrogen Isotherm: No	3	3	TN	TN	TP	TN	TN	TN
10.1021/acs.inorgchem.5b00096	Supporting Information	41	0	0	1	0	0	0	Figures: (3)_x000D_ Nitrogen Isotherm: No	3	3	TN	TN	TP	TN	TN	TN
10.1021/acs.inorgchem.5b00096	Supporting Information	42	0	0	1	0	0	0	Figures: (3)_x000D_ Nitrogen Isotherm: No	3	3	TN	TN	TP	TN	TN	TN
10.1021/acs.inorgchem.5b00096	Supporting Information	43	0	0	1	0	0	0	Figures: (3)_x000D_ Nitrogen Isotherm: No	3	3	TN	TN	TP	TN	TN	TN
10.1021/acs.inorgchem.5b00096	Supporting Information	44	0	0	1	0	0	0	Figures: (3)_x000D_ Nitrogen Isotherm: Figure S36_x000D_ Compound: 1-(FeBr???)??? in n-hexane_x000D_ Porosity: N/A_x000D_ Hysteresis: No_x000D_ Saturation: 90-100 Weight Percent_x000D_ Position: (0, 0.65, 1, 1)	3	3	TN	TN	TP	TN	TN	TN
10.1021/acs.inorgchem.5b00096	Supporting Information	45	0	0	1	0	0	0	Figures: (3)_x000D_ Nitrogen Isotherm: No	3	3	TN	TN	TP	TN	TN	TN
10.1021/acs.inorgchem.5b00096	Supporting Information	46	0	0	1	0	0	0	Figures: (3)_x000D_ Nitrogen Isotherm: No	3	3	TN	TN	TP	TN	TN	TN
10.1021/acs.inorgchem.5b00096	Supporting Information	47	0	0	0	0	0	1	Figures: (6) It does not have figures or have figures than not belong to the above class_x000D_ Nitrogen Isotherm: No	6	6	TN	TN	TN	TN	TN	TP
10.1021/acs.inorgchem.5b00096	Supporting Information	48	0	0	0	0	0	1	Figures: (6) It does not have figures or have figures than not belong to above class_x000D_ Nitrogen Isotherm: No	6	6	TN	TN	TN	TN	TN	TP
10.1021/acs.inorgchem.5b00096	Supporting Information	49	0	0	0	0	0	1	Figures: (6) It does not have figures or have figures than not belong to above class_x000D_ Nitrogen Isotherm: No	6	6	TN	TN	TN	TN	TN	TP
10.1021/acs.inorgchem.5b00096	Supporting Information	50	0	0	0	0	0	1	Figures: (6) It does not have figures or have figures than not belong to above class_x000D_ Nitrogen Isotherm: No	6	6	TN	TN	TN	TN	TN	TP
10.1021/acs.inorgchem.5b00096	Supporting Information	51	0	0	0	0	0	1	Figures: (6) It does not have figures or have figures than not belong to above class_x000D_ Nitrogen Isotherm: No	6	6	TN	TN	TN	TN	TN	TP
10.1021/acs.inorgchem.5b00096	Supporting Information	52	0	0	0	0	0	1	Figures: (6) It does not have figures or have figures than not belong to above class_x000D_ Nitrogen Isotherm: No	6	6	TN	TN	TN	TN	TN	TP
10.1021/acs.inorgchem.5b00096	Supporting Information	53	0	0	0	0	0	1	Figures: (6) It does not have figures or have figures than not belong to above class Nitrogen Isotherm: No	6	6	TN	TN	TN	TN	TN	TP
10.1021/acs.inorgchem.5b00096	Supporting Information	54	0	0	0	0	0	1	Figures: (6) It does not have figures or have figures than not belong to above class Nitrogen Isotherm: No	6	6	TN	TN	TN	TN	TN	TP
10.1021/acs.inorgchem.5b00096	Supporting Information	55	0	0	0	0	0	1	Figures: [Answer: (6)] Nitrogen Isotherm: No	6	6	TN	TN	TN	TN	TN	TP
10.1021/acs.inorgchem.5b00096	Main	1	0	0	0	1	0	0	Figures: (4);(6) Nitrogen Isotherm: No	4	46	TN	TN	TN	TP	TN	FP
10.1021/acs.inorgchem.5b00096	Main	2	0	0	0	1	0	0	Figures: (4);(6) Nitrogen Isotherm: No	4	46	TN	TN	TN	TP	TN	FP
10.1021/acs.inorgchem.5b00096	Main	3	0	0	0	0	0	1	Figures: (6) It does not have figures or have figures than not belong to above class Nitrogen Isotherm: No	6	6	TN	TN	TN	TN	TN	TP
10.1021/acs.inorgchem.5b00096	Main	4	0	0	0	1	0	0	Figures: (4) Nitrogen Isotherm: No	4	4	TN	TN	TN	TP	TN	TN
10.1021/acs.inorgchem.5b00096	Main	5	0	0	0	1	0	0	Figures: (4) Crystal structure or topology illustration Nitrogen Isotherm: No	4	4	TN	TN	TN	TP	TN	TN
10.1021/acs.inorgchem.5b00096	Main	6	0	0	0	0	0	1	Figures: (6) It does not have figures or have figures than not belong to above class. Nitrogen Isotherm: No.	6	6	TN	TN	TN	TN	TN	TP
10.1021/acs.inorgchem.5b00096	Main	7	0	0	0	0	1	0	Figures: (5) Nitrogen Isotherm: Figure 4 and Figure 5 Compound: 1-{Cu(Cls) }, 1-{CuCls}, 1-{Co(Cls) }, 1-{Fe(BF ) } Porosity: N/A Hysteresis: I do not know Saturation: Figure 4: ~0.6 - ~0.9 cm /g, Figure 5: ~2.0 - ~3.0 cm /g Position: (0, 0, 0.5, 0.5)	5	5	TN	TN	TN	TN	TP	TN
10.1021/acs.inorgchem.5b00096	Main	8	0	0	0	1	0	0	Figures: (4);(6) Nitrogen Isotherm: No	4	46	TN	TN	TN	TP	TN	FP
10.1021/acs.inorgchem.5b00096	Main	9	0	0	0	0	0	1	Figures: (6) It does not have figures or have figures than not belong to above class Nitrogen Isotherm: No	6	6	TN	TN	TN	TN	TN	TP
10.1021/acs.inorgchem.5b00096	Main	10	0	0	0	0	0	1	Figures: [Answer: (6) It does not have figures or have figures than not belong to above class] Nitrogen Isotherm: No	6	6	TN	TN	TN	TN	TN	TP
10.1021/acs.inorgchem.5b00096	Main	11	0	0	0	0	0	1	Figures: (6) It does not have figures or have figures than not belong to above class Nitrogen Isotherm: No	6	6	TN	TN	TN	TN	TN	TP
10.1021/acs.inorgchem.5b00130	Supporting Information	1	0	0	0	0	0	1	Figures: (6) It does not have figures or have figures than not belong to above class Nitrogen Isotherm: No	6	6	TN	TN	TN	TN	TN	TP
10.1021/acs.inorgchem.5b00130	Supporting Information	2	0	0	0	0	0	1	Figures: (6) It does not have figures or have figures than not belong to above class. Nitrogen Isotherm: No	6	6	TN	TN	TN	TN	TN	TP
10.1021/acs.inorgchem.5b00130	Supporting Information	3	0	0	0	1	0	0	Figures: (4) Crystal structure or topology illustration Nitrogen Isotherm: No	4	4	TN	TN	TN	TP	TN	TN
10.1021/acs.inorgchem.5b00130	Supporting Information	4	0	1	0	1	0	0	Figures: (2);(4) Nitrogen Isotherm: No	24	24	TN	TP	TN	TP	TN	TN
10.1021/acs.inorgchem.5b00130	Supporting Information	5	0	1	0	0	0	0	Figures: (2);(2) Nitrogen Isotherm: No	2	2	TN	TP	TN	TN	TN	TN
10.1021/acs.inorgchem.5b00130	Supporting Information	6	0	0	1	0	0	0	Figures: (3);(5)_x000D_ Nitrogen Isotherm: No	3	35	TN	TN	TP	TN	FP	TN
10.1021/acs.inorgchem.5b00130	Main	1	0	0	0	1	0	0	Figures: (4);(6) Nitrogen Isotherm: No	4	46	TN	TN	TN	TP	TN	FP
10.1021/acs.inorgchem.5b00130	Main	2	0	0	0	0	0	1	Figures: [Answer: (6)] Nitrogen Isotherm: No	6	6	TN	TN	TN	TN	TN	TP
10.1021/acs.inorgchem.5b00130	Main	3	0	0	0	1	0	0	Figures: (4) Crystal structure or topology illustration Nitrogen Isotherm: No	4	4	TN	TN	TN	TP	TN	TN
10.1021/acs.inorgchem.5b00130	Main	4	0	0	0	1	0	0	Figures: (4) Nitrogen Isotherm: No	4	4	TN	TN	TN	TP	TN	TN
10.1021/acs.inorgchem.5b00130	Main	5	0	0	0	0	0	1	Figures: (3);(4);(5) Nitrogen Isotherm: Figure S3, Supporting Information (not displayed in the provided image) Compound: N/A Porosity: N/A Hysteresis: I do not know Saturation: I do not know Position: N/A	6	345	TN	TN	FP	FP	FP	FN
10.1021/acs.inorgchem.5b00130	Main	6	0	0	0	0	0	1	Figures: (6) It does not have figures or have figures than not belong to above class_x000D_ Nitrogen Isotherm: No	6	6	TN	TN	TN	TN	TN	TP
10.1021/acs.inorgchem.5b00130	Main	7	0	0	0	0	0	1	Figures: (6) It does not have figures or have figures than not belong to above class Nitrogen Isotherm: No	6	6	TN	TN	TN	TN	TN	TP
10.1021/acs.inorgchem.5b00194	Supporting Information	1	0	0	0	0	0	1	Figures: [Answer: (6) It does not have figures or have figures than not belong to above class] Nitrogen Isotherm: No	6	6	TN	TN	TN	TN	TN	TP
10.1021/acs.inorgchem.5b00194	Supporting Information	2	0	0	0	0	0	1	Figures: (6) It does not have figures or have figures than not belong to above class_x000D_ Nitrogen Isotherm: No	6	6	TN	TN	TN	TN	TN	TP
10.1021/acs.inorgchem.5b00194	Supporting Information	3	0	0	0	0	0	1	Figures: (6) It does not have figures or have figures than not belong to above class Nitrogen Isotherm: No	6	6	TN	TN	TN	TN	TN	TP
10.1021/acs.inorgchem.5b00194	Supporting Information	4	0	1	1	0	0	0	Figures: (2);(3) Nitrogen Isotherm: No	23	23	TN	TP	TP	TN	TN	TN
10.1021/acs.inorgchem.5b00194	Supporting Information	5	0	0	0	0	1	0	Figures: (5) Nitrogen Isotherm: No	5	5	TN	TN	TN	TN	TP	TN
10.1021/acs.inorgchem.5b00194	Supporting Information	6	0	0	0	0	0	1	I'm sorry, but you did not provide an image with your message. Please upload the image you are referring to so I can analyze it and provide you with the answers to your questions.	6	6	TN	TN	TN	TN	TN	TP
10.1021/acs.inorgchem.5b00194	Main	1	0	0	0	1	0	0	Figures: (6) It does not have figures or have figures than not belong to above class Nitrogen Isotherm: No	4	6	TN	TN	TN	FN	TN	FP
10.1021/acs.inorgchem.5b00194	Main	2	0	0	0	0	0	1	Figures: (6) It does not have figures or have figures than not belong to the above class Nitrogen Isotherm: No	6	6	TN	TN	TN	TN	TN	TP
10.1021/acs.inorgchem.5b00194	Main	3	1	0	0	1	0	0	Figures: (1);(4);(5) Nitrogen Isotherm: Figure 2 Compound: ZJU-70a Porosity: The surface areas of ZJU-70a are 1791 and 1999 m^2/g, respectively. Its pore volume is 0.76 cm^3/g. The calculated BET surface area for the single-crystal structure is 2509 m^2/g. Hysteresis: Yes Saturation: 400 - 500 cm^3/g Position: (0.55, 0.6, 1, 0.85)	14	145	TP	TN	TN	TP	FP	TN
10.1021/acs.inorgchem.5b00194	Main	4	0	0	0	0	1	0	Figures: [Answer: (5)]_x000D_ Nitrogen Isotherm: No	5	5	TN	TN	TN	TN	TP	TN
10.1021/acs.inorgchem.5b00194	Main	5	0	0	0	0	0	1	Figures: (6) It does not have figures or have figures that do not belong to the above class Nitrogen Isotherm: No	6	6	TN	TN	TN	TN	TN	TP
10.1021/acs.inorgchem.5b00535	Supporting Information	1	0	0	0	0	0	1	Figures: (6) It does not have figures or have figures than not belong to the above class_x000D_ Nitrogen Isotherm: No	6	6	TN	TN	TN	TN	TN	TP
10.1021/acs.inorgchem.5b00535	Supporting Information	2	0	0	0	0	0	1	Figures: [Answer: (6) It does not have figures or have figures than not belong to above class] Nitrogen Isotherm: No	6	6	TN	TN	TN	TN	TN	TP
10.1021/acs.inorgchem.5b00535	Supporting Information	3	0	0	0	0	0	1	Figures: [Answer: (6) It does not have figures or have figures than not belong to above class] Nitrogen Isotherm: No	6	6	TN	TN	TN	TN	TN	TP
10.1021/acs.inorgchem.5b00535	Supporting Information	4	0	0	0	0	0	1	Figures: (6) It does not have figures or have figures than not belong to the above class. Nitrogen Isotherm: No	6	6	TN	TN	TN	TN	TN	TP
10.1021/acs.inorgchem.5b00535	Supporting Information	5	0	0	0	0	0	1	Figures: (6) It does not have figures or have figures than not belong to the above class Nitrogen Isotherm: No	6	6	TN	TN	TN	TN	TN	TP
10.1021/acs.inorgchem.5b00535	Supporting Information	6	0	0	0	0	0	1	Figures: (6) It does not have figures or have figures than not belong to above class Nitrogen Isotherm: No	6	6	TN	TN	TN	TN	TN	TP
10.1021/acs.inorgchem.5b00535	Supporting Information	7	0	0	0	0	0	1	Figures: (6) It does not have figures or have figures than not belong to above class_x000D_ Nitrogen Isotherm: No	6	6	TN	TN	TN	TN	TN	TP
10.1021/acs.inorgchem.5b00535	Supporting Information	8	0	0	0	0	0	1	Figures: (6) It does not have figures or have figures than not belong to above class Nitrogen Isotherm: No	6	6	TN	TN	TN	TN	TN	TP
10.1021/acs.inorgchem.5b00535	Supporting Information	9	0	0	0	0	0	1	Figures: [Answer: (6) It does not have figures or have figures than not belong to above class] Nitrogen Isotherm: No	6	6	TN	TN	TN	TN	TN	TP
10.1021/acs.inorgchem.5b00535	Supporting Information	10	0	0	0	0	0	1	Figures: (6) It does not have figures or have figures that not belong to the above class Nitrogen Isotherm: No	6	6	TN	TN	TN	TN	TN	TP
10.1021/acs.inorgchem.5b00535	Supporting Information	11	0	0	0	0	0	1	Figures: (6) It does not have figures or have figures than not belong to above class Nitrogen Isotherm: No	6	6	TN	TN	TN	TN	TN	TP
10.1021/acs.inorgchem.5b00535	Supporting Information	12	0	0	0	0	0	1	Figures: (6) It does not have figures or have figures than not belong to above class Nitrogen Isotherm: No	6	6	TN	TN	TN	TN	TN	TP
10.1021/acs.inorgchem.5b00535	Supporting Information	13	0	0	1	0	0	0	Figures: (3);(6) Nitrogen Isotherm: No	3	36	TN	TN	TP	TN	TN	FP
10.1021/acs.inorgchem.5b00535	Supporting Information	14	0	0	0	0	0	1	Figures: (6) It does not have figures or have figures than not belong to above class_x000D_ Nitrogen Isotherm: No	6	6	TN	TN	TN	TN	TN	TP
10.1021/acs.inorgchem.5b00535	Supporting Information	15	0	0	0	0	0	1	Figures: (6) It does not have figures or have figures than not belong to above class_x000D_ Nitrogen Isotherm: No	6	6	TN	TN	TN	TN	TN	TP
10.1021/acs.inorgchem.5b00535	Supporting Information	16	0	0	0	0	0	1	Figures: [Answer: (5)]_x000D_ Nitrogen Isotherm: No_x000D_ _x000D_ Unfortunately, as an AI developed by OpenAI, I'm currently unable to provide coordinates for content within images or documents.	6	5	TN	TN	TN	TN	FP	FN
10.1021/acs.inorgchem.5b00535	Supporting Information	17	0	0	0	0	0	1	Figures: [Answer: (5)]_x000D_ Nitrogen Isotherm: [Answer: Figure S17 and Figure S18]_x000D_ Compound: [Answer: UiO-68-triazole-B, UiO-68-triazole-C]_x000D_ Porosity: [Answer: SBET = 1299 cm??/g and Vm = 0.51 cm??/g for UiO-68-triazole-B; SBET = 1238 cm??/g and Vm = 0.52 cm??/g for UiO-68-triazole-C]_x000D_ Hysteresis: [Answer: No]_x000D_ Saturation: [Answer: Approximately 200 - 250 cm??/g for bot…	6	5	TN	TN	TN	TN	FP	FN
10.1021/acs.inorgchem.5b00535	Supporting Information	18	0	0	0	0	0	1	Figures: (5)_x000D_ Nitrogen Isotherm: Figure S19_x000D_ Compound: UIO-68-alkyne, UIO-68-triazole-A, UIO-68-triazole-B, UIO-68-triazole-C_x000D_ Porosity: N/A_x000D_ Saturation: Approximately 0.5 - 2.5 cm^3/g_x000D_ Position: (0,0.1,1,0.6)	6	5	TN	TN	TN	TN	FP	FN
10.1021/acs.inorgchem.5b00535	Main	1	0	0	0	1	0	0	Figures: (4);(5)_x000D_ Nitrogen Isotherm: No	4	45	TN	TN	TN	TP	FP	TN
10.1021/acs.inorgchem.5b00535	Main	2	1	1	0	1	0	0	Figures: (1);(2);(4)_x000D_ Nitrogen Isotherm: Figure 4_x000D_ Compound: UiO-68-alkyne, UiO-68-triazole-A, UiO-68-triazole-B, UiO-68-triazole-C_x000D_ Porosity: N/A_x000D_ Hysteresis: Yes_x000D_ Saturation: 700 - 800 cm^3/g_x000D_ Position: (0.5,0.4,1,0.7)	124	124	TP	TP	TN	TP	TN	TN
10.1021/acs.inorgchem.5b00535	Main	3	0	0	0	0	0	1	Figures: (6) It does not have figures or have figures than not belong to above class_x000D_ Nitrogen Isotherm: No	6	6	TN	TN	TN	TN	TN	TP
10.1021/acs.inorgchem.5b00561	Supporting Information	1	0	0	0	0	0	1	The image you have provided appears to be the title page of a scientific paper or supplementary information for a manuscript. Based on the visible content, it contains no figures. It is only a text-based title page with the title of the work, authors' names, affiliations, and contact information for correspondence._x000D_ _x000D_ Therefore, the appropriate template response for the information av…	6	6	TN	TN	TN	TN	TN	TP
10.1021/acs.inorgchem.5b00561	Supporting Information	2	0	0	0	1	0	0	Figures: (4)_x000D_ Nitrogen Isotherm: No	4	4	TN	TN	TN	TP	TN	TN
10.1021/acs.inorgchem.5b00561	Supporting Information	3	0	1	1	1	0	0	Figures: (2);(4);(3)_x000D_ Nitrogen Isotherm: No	234	234	TN	TP	TP	TP	TN	TN
10.1021/acs.inorgchem.5b00561	Supporting Information	4	0	0	0	1	0	0	Figures: (3);(4)_x000D_ Nitrogen Isotherm: No	4	34	TN	TN	FP	TP	TN	TN
10.1021/acs.inorgchem.5b00561	Supporting Information	5	0	0	0	0	0	1	Figures: (6) It does not have figures or have figures that do not belong to the above class Nitrogen Isotherm: No	6	6	TN	TN	TN	TN	TN	TP
10.1021/acs.inorgchem.5b00561	Supporting Information	6	0	0	0	0	0	1	Figures: (5) Nitrogen Isotherm: No	6	5	TN	TN	TN	TN	FP	FN
10.1021/acs.inorgchem.5b00561	Main	1	0	0	0	1	1	0	Figures: (4);(5) Nitrogen Isotherm: Figure 1a Compound: 1 Porosity: N/A Hysteresis: Yes Saturation: 75-100 cm3/g Position: (0,0.7,0.4,0.9)	45	45	TN	TN	TN	TP	TP	TN
10.1021/acs.inorgchem.5b00561	Main	2	0	0	0	1	0	0	Figures: (4);(6) Nitrogen Isotherm: No	4	46	TN	TN	TN	TP	TN	FP
10.1021/acs.inorgchem.5b00561	Main	3	0	0	0	1	0	0	Figures: (4) Nitrogen Isotherm: No	4	4	TN	TN	TN	TP	TN	TN
10.1021/acs.inorgchem.5b00561	Main	4	0	0	0	1	0	0	Figures: (4);(5) Nitrogen Isotherm: Figure 3(d) Compound: N/A Porosity: N/A Hysteresis: I do not know Saturation: I do not know Position: (0.47, 0.69, 0.99, 0.99)	4	45	TN	TN	TN	TP	FP	TN
10.1021/acs.inorgchem.5b00561	Main	5	0	1	0	0	1	0	Figures: (2);(5) Nitrogen Isotherm: No	25	25	TN	TP	TN	TN	TP	TN
10.1021/acs.inorgchem.5b00561	Main	6	1	0	0	0	1	0	Figures: (1);(5) Nitrogen Isotherm: Figure 6(b) Compound: 273 K CO2, 283 K CO2, 298 K CO2, 273 K CH4, 298 K N2 Porosity: N/A Hysteresis: No Saturation: 65 - 75 cm3/g Position: (0, 0.25, 0.6, 0.55)	15	15	TP	TN	TN	TN	TP	TN
10.1021/acs.inorgchem.5b00561	Main	7	0	0	0	0	0	1	Figures: (6) It does not have figures or have figures than not belong to above class Nitrogen Isotherm: No	6	6	TN	TN	TN	TN	TN	TP
10.1021/acs.inorgchem.5b01023	Supporting Information	1	0	0	0	0	0	1	Figures: (6) It does not have figures or have figures than not belong to above class_x000D_ Nitrogen Isotherm: No	6	6	TN	TN	TN	TN	TN	TP
10.1021/acs.inorgchem.5b01023	Supporting Information	2	0	0	0	1	0	0	Figures: (4) Nitrogen Isotherm: No	4	4	TN	TN	TN	TP	TN	TN
10.1021/acs.inorgchem.5b01023	Supporting Information	3	0	1	1	0	0	0	Figures: (3);(2) Nitrogen Isotherm: No	23	23	TN	TP	TP	TN	TN	TN
10.1021/acs.inorgchem.5b01023	Supporting Information	4	0	0	0	0	1	0	Figures: (5) Nitrogen Isotherm: Figure S5 Compound: C3H8, C2H4, CO2, CH4 Porosity: N/A Hysteresis: I do not know Saturation: 3.0 - 3.5 cm^3/mol for C3H8, 2.5 - 3.0 cm^3/mol for C2H4, 0.5 - 1.0 cm^3/mol for CO2, 0.0 - 0.5 cm^3/mol for CH4 Position: (0, 0, 1, 0.5)	5	5	TN	TN	TN	TN	TP	TN
10.1021/acs.inorgchem.5b01023	Supporting Information	5	0	0	0	0	0	1	Figures: (6) It does not have figures or have figures than not belong to above class Nitrogen Isotherm: No	6	6	TN	TN	TN	TN	TN	TP
10.1021/acs.inorgchem.5b01023	Main	1	0	0	0	1	0	0	Figures: (4);(5) Nitrogen Isotherm: No	4	45	TN	TN	TN	TP	FP	TN
10.1021/acs.inorgchem.5b01023	Main	2	1	0	0	1	1	0	Figures: (1);(4);(3) Nitrogen Isotherm: Figure 3. Gas-sorption isotherms for FIR-28-ht at 77 K; (a) N2; (b) H2. Compound: FIR-28-ht Porosity: N/A Hysteresis: Yes Saturation: 250 - 300 cm3/g Position: (0.5, 0.8, 1, 1)	145	134	TP	TN	FP	TP	FN	TN
10.1021/acs.inorgchem.5b01023	Main	3	0	0	0	0	1	0	Figures: (5)_x000D_ Nitrogen Isotherm: No	5	5	TN	TN	TN	TN	TP	TN
10.1021/acs.inorgchem.5b01023	Main	4	0	0	0	0	0	1	Figures: (6) It does not have figures or have figures than not belong to above class Nitrogen Isotherm: No	6	6	TN	TN	TN	TN	TN	TP
10.1021/acs.inorgchem.5b02108	Supporting Information	1	0	0	0	0	0	1	Figures: [Answer: (6) It does not have figures or have figures than not belong to above class]_x000D_ Nitrogen Isotherm: No	6	6	TN	TN	TN	TN	TN	TP
10.1021/acs.inorgchem.5b02108	Supporting Information	2	0	0	0	0	0	1	Figures: (6) It does not have figures or have figures than not belong to above class Nitrogen Isotherm: No	6	6	TN	TN	TN	TN	TN	TP
10.1021/acs.inorgchem.5b02108	Supporting Information	3	0	1	0	0	0	0	Figures: (2) Nitrogen Isotherm: No	2	2	TN	TP	TN	TN	TN	TN
10.1021/acs.inorgchem.5b02108	Supporting Information	4	0	1	0	0	0	0	Figures: (2) Nitrogen Isotherm: No	2	2	TN	TP	TN	TN	TN	TN
10.1021/acs.inorgchem.5b02108	Supporting Information	5	0	1	0	0	0	0	Figures: (2) Nitrogen Isotherm: No	2	2	TN	TP	TN	TN	TN	TN
10.1021/acs.inorgchem.5b02108	Supporting Information	6	0	0	0	0	1	0	Figures: (5) Other gas sorption isotherm (e.g. water vapor, CO2, H2, CH4, etc.) Nitrogen Isotherm: No	5	5	TN	TN	TN	TN	TP	TN
10.1021/acs.inorgchem.5b02108	Supporting Information	7	1	0	1	0	0	0	Figures: (1);(3) Nitrogen Isotherm: Figure S8 Compound: MFM-300(Ga2), MFM-300(Ga1.87Fe0.13) Porosity: N/A Hysteresis: No Saturation: 140 - 160 cm3/g Position: (0, 0.5, 1, 1)	13	13	TP	TN	TP	TN	TN	TN
10.1021/acs.inorgchem.5b02108	Supporting Information	8	0	0	0	0	1	0	Figures: (5) Nitrogen Isotherm: No	5	5	TN	TN	TN	TN	TP	TN
10.1021/acs.inorgchem.5b02108	Supporting Information	9	0	0	0	0	1	0	Figures: (5) Nitrogen Isotherm: No	5	5	TN	TN	TN	TN	TP	TN
10.1021/acs.inorgchem.5b02108	Supporting Information	10	0	0	0	0	0	1	Figures: (5) Other gas sorption isotherm (e.g. water vapor, CO2, H2, CH4, etc.) Nitrogen Isotherm: No	6	5	TN	TN	TN	TN	FP	FN
10.1021/acs.inorgchem.5b02108	Supporting Information	11	0	0	0	1	0	0	Figures: (4) Nitrogen Isotherm: No	4	4	TN	TN	TN	TP	TN	TN
10.1021/acs.inorgchem.5b02108	Supporting Information	12	0	0	0	0	0	1	Figures: (6) It does not have figures or have figures than not belong to above class Nitrogen Isotherm: No	6	6	TN	TN	TN	TN	TN	TP
10.1021/acs.inorgchem.5b02108	Supporting Information	13	0	0	0	0	0	1	Figures: (5) Other gas sorption isotherm (e.g. water vapor, CO2, H2, CH4, etc.) Nitrogen Isotherm: No	6	5	TN	TN	TN	TN	FP	FN
10.1021/acs.inorgchem.5b02108	Main	1	0	0	0	1	0	0	Figures: [Answer: (6) It does not have figures or have figures than not belong to above class] Nitrogen Isotherm: No	4	6	TN	TN	TN	FN	TN	FP
10.1021/acs.inorgchem.5b02108	Main	2	0	0	0	0	0	1	Figures: (6) It does not have figures or have figures than not belong to above class Nitrogen Isotherm: No	6	6	TN	TN	TN	TN	TN	TP
10.1021/acs.inorgchem.5b02108	Main	3	0	0	0	0	0	1	Figures: (6) It does not have figures or have figures than not belong to above class Nitrogen Isotherm: No	6	6	TN	TN	TN	TN	TN	TP
10.1021/acs.inorgchem.5b02108	Main	4	0	0	0	1	0	0	Figures: (4) Crystal structure or topology illustration Nitrogen Isotherm: No	4	4	TN	TN	TN	TP	TN	TN
10.1021/acs.inorgchem.5b02108	Main	5	0	0	0	1	0	0	Figures: (4) Nitrogen Isotherm: No	4	4	TN	TN	TN	TP	TN	TN
10.1021/acs.inorgchem.5b02108	Main	6	0	0	0	0	1	0	Figures: (5) Nitrogen Isotherm: No Compound: N/A Porosity: N/A Hysteresis: N/A Saturation: N/A Position: N/A	5	5	TN	TN	TN	TN	TP	TN
10.1021/acs.inorgchem.5b02108	Main	7	0	0	0	0	0	1	Figures: (5) Nitrogen Isotherm: No	6	5	TN	TN	TN	TN	FP	FN
10.1021/acs.inorgchem.5b02108	Main	8	0	0	0	0	0	1	Figures: (4);(5) Nitrogen Isotherm: No	6	45	TN	TN	TN	FP	FP	FN
10.1021/acs.inorgchem.5b02108	Main	9	0	0	0	1	0	0	Figures: (4);(5) Nitrogen Isotherm: No	4	45	TN	TN	TN	TP	FP	TN
10.1021/acs.inorgchem.5b02108	Main	10	0	0	0	0	0	1	Figures: (6) It does not have figures or have figures than not belong to above class Nitrogen Isotherm: No	6	6	TN	TN	TN	TN	TN	TP
10.1021/acs.inorgchem.5b02108	Main	11	0	0	0	0	0	1	Figures: (6) It does not have figures or have figures than not belong to above class Nitrogen Isotherm: No	6	6	TN	TN	TN	TN	TN	TP
10.1021/acs.inorgchem.5b02108	Main	12	0	0	0	0	0	1	Figures: (5) Nitrogen Isotherm: No	6	5	TN	TN	TN	TN	FP	FN
10.1021/acs.inorgchem.5b02108	Main	13	0	0	0	0	0	1	Figures: [Answer: (6) It does not have figures or have figures than not belong to above class] Nitrogen Isotherm: No	6	6	TN	TN	TN	TN	TN	TP
10.1021/acs.inorgchem.5b02316	Supporting Information	1	0	0	0	0	0	1	Figures: [Answer: (6) It does not have figures or have figures than not belong to the above class]_x000D_ Nitrogen Isotherm: No	6	6	TN	TN	TN	TN	TN	TP
10.1021/acs.inorgchem.5b02316	Supporting Information	2	0	0	0	0	0	1	Figures: (6) It does not have figures or have figures than not belong to above class Nitrogen Isotherm: No	6	6	TN	TN	TN	TN	TN	TP
10.1021/acs.inorgchem.5b02316	Supporting Information	3	0	0	0	0	0	1	Figures: (6) It does not have figures or have figures than not belong to above class Nitrogen Isotherm: No	6	6	TN	TN	TN	TN	TN	TP
10.1021/acs.inorgchem.5b02316	Supporting Information	4	0	0	0	0	0	1	Figures: (5) Nitrogen Isotherm: Effluent curves Compound: N/A Porosity: N/A Hysteresis: I do not know Saturation: 1.0 - 1.2 cc/g Position: (0, 0.3, 0.6, 0.6)	6	5	TN	TN	TN	TN	FP	FN
10.1021/acs.inorgchem.5b02316	Supporting Information	5	0	0	0	0	0	1	Figures: (6) It does not have figures or have figures than not belong to the above class Nitrogen Isotherm: No	6	6	TN	TN	TN	TN	TN	TP
10.1021/acs.inorgchem.5b02316	Supporting Information	6	0	0	0	0	0	1	Figures: (6) It does not have figures or have figures than not belong to above class Nitrogen Isotherm: No	6	6	TN	TN	TN	TN	TN	TP
10.1021/acs.inorgchem.5b02316	Supporting Information	7	0	0	0	0	0	1	Figures: (6) It does not have figures or have figures than not belong to above class Nitrogen Isotherm: No	6	6	TN	TN	TN	TN	TN	TP
10.1021/acs.inorgchem.5b02316	Supporting Information	8	0	0	0	0	0	1	Figures: (6) It does not have figures or have figures that do not belong to the above class_x000D_ Nitrogen Isotherm: No	6	6	TN	TN	TN	TN	TN	TP
10.1021/acs.inorgchem.5b02316	Supporting Information	9	0	0	0	0	0	1	Figures: (6) It does not have figures or have figures that do not belong to the above class_x000D_ Nitrogen Isotherm: No	6	6	TN	TN	TN	TN	TN	TP
10.1021/acs.inorgchem.5b02316	Supporting Information	10	0	0	0	1	0	0	Figures: (4) Crystal structure or topology illustration_x000D_ Nitrogen Isotherm: No	4	4	TN	TN	TN	TP	TN	TN
10.1021/acs.inorgchem.5b02316	Supporting Information	11	0	0	0	1	0	0	Figures: (4)_x000D_ Nitrogen Isotherm: No	4	4	TN	TN	TN	TP	TN	TN
10.1021/acs.inorgchem.5b02316	Supporting Information	12	0	0	0	1	0	0	Figures: (4);(5)_x000D_ Nitrogen Isotherm: No	4	45	TN	TN	TN	TP	FP	TN
10.1021/acs.inorgchem.5b02316	Supporting Information	13	0	0	0	0	0	1	Figures: (6) It does not have figures or have figures than not belong to above class_x000D_ Nitrogen Isotherm: No	6	6	TN	TN	TN	TN	TN	TP
10.1021/acs.inorgchem.5b02316	Supporting Information	14	0	0	1	0	0	0	Figures: (3) Nitrogen Isotherm: No	3	3	TN	TN	TP	TN	TN	TN
10.1021/acs.inorgchem.5b02316	Supporting Information	15	0	1	0	0	0	0	Figures: (2) Nitrogen Isotherm: No	2	2	TN	TP	TN	TN	TN	TN
10.1021/acs.inorgchem.5b02316	Supporting Information	16	0	0	0	0	0	1	The provided image shows a pore size distribution plot for a compound based on nitrogen adsorption isotherms, along with an inset showing a similar distribution from CO2 adsorption._x000D_ _x000D_ Figures: [Answer: (5)]_x000D_ Nitrogen Isotherm: [Answer: Yes, in the inset]_x000D_ Compound: [Answer: FUJ-14-BF-a]_x000D_ Porosity: [Answer: N/A]_x000D_ Hysteresis: [Answer: I do not know]_x000D_ Satur…	6	5	TN	TN	TN	TN	FP	FN
10.1021/acs.inorgchem.5b02316	Supporting Information	17	0	0	0	0	1	0	Figures: (5) Nitrogen Isotherm: Figure S9; Figure S10 Compound: FJU-14-BF -a; FJU-14-ClO -a Porosity: N/A Hysteresis: I do not know Saturation: For Figure S9: 80 - 100 cm /g For Figure S10: 20 - 30 cm /g Position: (0, 0, 1, 0.65)	5	5	TN	TN	TN	TN	TP	TN
10.1021/acs.inorgchem.5b02316	Supporting Information	18	0	0	0	0	1	0	Figures: (5) Nitrogen Isotherm: No	5	5	TN	TN	TN	TN	TP	TN
10.1021/acs.inorgchem.5b02316	Supporting Information	19	0	0	0	0	0	1	Figures: (6) It does not have figures or have figures than not belong to above class Nitrogen Isotherm: No	6	6	TN	TN	TN	TN	TN	TP
10.1021/acs.inorgchem.5b02316	Supporting Information	20	0	0	0	0	0	1	Figures: (6) It does not have figures or have figures than not belong to above class Nitrogen Isotherm: No	6	6	TN	TN	TN	TN	TN	TP
10.1021/acs.inorgchem.5b02316	Main	1	0	0	0	1	0	0	To provide the requested analysis, I'll need to process the image content first._x000D_ _x000D_ Figures: [Answer: (5)]_x000D_ Nitrogen Isotherm: No_x000D_ _x000D_ Given that the only figure visible on the page is labeled "CO_2 uptake" and details the CO_2 adsorption capacity, it can be inferred that this is not a nitrogen adsorption-desorption isotherm, but rather another gas sorption isotherm, s…	4	5	TN	TN	TN	FN	FP	TN
10.1021/acs.inorgchem.5b02316	Main	2	0	0	0	1	0	0	Figures: (6) It does not have figures or have figures than not belong to above class Nitrogen Isotherm: No	4	6	TN	TN	TN	FN	TN	FP
10.1021/acs.inorgchem.5b02316	Main	3	0	0	0	0	0	1	Figures: (6) It does not have figures or have figures than not belong to the above class. Nitrogen Isotherm: No	6	6	TN	TN	TN	TN	TN	TP
10.1021/acs.inorgchem.5b02316	Main	4	0	0	0	1	0	0	Figures: (4) Nitrogen Isotherm: No	4	4	TN	TN	TN	TP	TN	TN
10.1021/acs.inorgchem.5b02316	Main	5	1	1	0	0	1	0	Figures: (1);(2);(5) Nitrogen Isotherm: Figure 4(a) Compound: FUJ-14-NO , FUJ-14-CIO , FUJ-14-BF Porosity: N/A Hysteresis: Yes Saturation: 100 - 120 cm /g Position: (0, 0.15, 0.55, 0.65)	125	125	TP	TP	TN	TN	TP	TN
10.1021/acs.inorgchem.5b02316	Main	6	0	0	0	1	0	0	Figures: (6) It does not have figures or have figures than not belong to above class Nitrogen Isotherm: No	4	6	TN	TN	TN	FN	TN	FP
10.1021/acs.inorgchem.5b02316	Main	7	0	0	0	0	0	1	Figures: (6) It does not have figures or have figures than not belong to above class Nitrogen Isotherm: No	6	6	TN	TN	TN	TN	TN	TP
10.1021/acs.inorgchem.5b02316	Main	8	0	0	0	0	0	1	Figures: (6) It does not have figures or have figures that do not belong to the above class Nitrogen Isotherm: No	6	6	TN	TN	TN	TN	TN	TP
10.1021/acs.inorgchem.5b02378	Supporting Information	1	0	1	0	0	0	0	Figures: (2) Nitrogen Isotherm: Figure S1 Compound: N/A Porosity: N/A Saturation: I do not know Position: (0, 0.5, 1, 0.8)	2	2	TN	TP	TN	TN	TN	TN
10.1021/acs.inorgchem.5b02378	Supporting Information	2	0	0	0	1	0	0	Figures: (4);(5) Nitrogen Isotherm: Figure S3 Compound: 1 Porosity: N/A Hysteresis: Yes Saturation: 27-28 cm /g Position: (0.1,0.5,0.9,1)	4	45	TN	TN	TN	TP	FP	TN
10.1021/acs.inorgchem.5b02378	Supporting Information	3	0	0	0	0	0	1	Figures: (6) It does not have figures or have figures than not belong to above class Nitrogen Isotherm: No	6	6	TN	TN	TN	TN	TN	TP
10.1021/acs.inorgchem.5b02378	Supporting Information	4	0	0	0	0	0	1	Figures: (6) It does not have figures or have figures than not belong to above class Nitrogen Isotherm: No	6	6	TN	TN	TN	TN	TN	TP
10.1021/acs.inorgchem.5b02378	Supporting Information	5	0	0	0	0	0	1	Figures: (6) It does not have figures or have figures than not belong to above class Nitrogen Isotherm: No	6	6	TN	TN	TN	TN	TN	TP
10.1021/acs.inorgchem.5b02378	Supporting Information	6	0	0	0	0	0	1	Figures: (6) It does not have figures or have figures than not belong to above class Nitrogen Isotherm: No	6	6	TN	TN	TN	TN	TN	TP
10.1021/acs.inorgchem.5b02378	Supporting Information	7	0	0	0	0	0	1	The provided image is a textual page from a scientific document, and from what can be seen, it appears to be a list of references for a scholarly article, likely pertaining to chemistry or materials science research given the context provided in the question about metal-organic frameworks (MOFs). This page does not contain any figures such as nitrogen isotherms, PXRD patterns, TGA curves, crystal…	6	6	TN	TN	TN	TN	TN	TP
10.1021/acs.inorgchem.5b02378	Main	1	0	0	0	1	0	0	Figures: (4);(5) Nitrogen Isotherm: No	4	45	TN	TN	TN	TP	FP	TN
10.1021/acs.inorgchem.5b02378	Main	2	0	0	0	0	0	1	Figures: (6) It does not have figures or have figures than not belong to the above class Nitrogen Isotherm: No	6	6	TN	TN	TN	TN	TN	TP
10.1021/acs.inorgchem.5b02378	Main	3	0	1	1	1	0	0	Figures: (3);(4) Nitrogen Isotherm: Figure 2 Compound: N/A Porosity: N/A Saturation: 180-200 cm3/g Position: (0.4, 0.4, 0.8, 0.7)	234	34	TN	FN	TP	TP	TN	TN
10.1021/acs.inorgchem.5b02378	Main	4	0	0	0	0	0	1	Figures: (6) It does not have figures or have figures than not belong to above class Nitrogen Isotherm: No	6	6	TN	TN	TN	TN	TN	TP
10.1021/acs.inorgchem.5b02378	Main	5	0	0	0	0	0	1	Figures: [Answer: (6)]_x000D_ Nitrogen Isotherm: No	6	6	TN	TN	TN	TN	TN	TP
10.1021/acs.inorgchem.5b02378	Main	6	0	0	0	0	0	1	Figures: (6) It does not have figures or have figures than not belong to above class Nitrogen Isotherm: No	6	6	TN	TN	TN	TN	TN	TP
10.1021/acs.inorgchem.5b02973	Supporting Information	1	0	0	0	0	0	1	Figures: (6) It does not have figures or have figures than not belong to above class Nitrogen Isotherm: No	6	6	TN	TN	TN	TN	TN	TP
10.1021/acs.inorgchem.5b02973	Supporting Information	2	0	0	0	0	0	1	Figures: (6) It does not have figures or have figures than not belong to above class Nitrogen Isotherm: No	6	6	TN	TN	TN	TN	TN	TP
10.1021/acs.inorgchem.5b02973	Supporting Information	3	0	0	1	0	0	0	Figures: (3) Nitrogen Isotherm: No	3	3	TN	TN	TP	TN	TN	TN
10.1021/acs.inorgchem.5b02973	Supporting Information	4	0	1	0	0	0	0	Figures: (2);(5) Nitrogen Isotherm: No	2	25	TN	TP	TN	TN	FP	TN
10.1021/acs.inorgchem.5b02973	Supporting Information	5	0	0	0	0	0	1	Figures: (6) It does not have figures or have figures than not belong to above class Nitrogen Isotherm: No	6	6	TN	TN	TN	TN	TN	TP
10.1021/acs.inorgchem.5b02973	Supporting Information	6	0	0	0	0	0	1	Figures: (6) It does not have figures or have figures than not belong to above class Nitrogen Isotherm: No	6	6	TN	TN	TN	TN	TN	TP
10.1021/acs.inorgchem.5b02973	Supporting Information	7	0	0	0	0	0	1	Figures: (6) It does not have figures or have figures than not belong to above class Nitrogen Isotherm: No	6	6	TN	TN	TN	TN	TN	TP
10.1021/acs.inorgchem.5b02973	Supporting Information	8	0	0	0	0	0	1	Figures: (6) It does not have figures or have figures than not belong to above class Nitrogen Isotherm: No	6	6	TN	TN	TN	TN	TN	TP
10.1021/acs.inorgchem.5b02973	Supporting Information	9	0	0	0	0	0	1	Figures: (6) It does not have figures or have figures than not belong to above class Nitrogen Isotherm: No	6	6	TN	TN	TN	TN	TN	TP
10.1021/acs.inorgchem.5b02973	Supporting Information	10	0	0	0	0	0	1	Figures: (6) It does not have figures or have figures than not belong to the above class. Nitrogen Isotherm: No	6	6	TN	TN	TN	TN	TN	TP
10.1021/acs.inorgchem.5b02973	Supporting Information	11	0	0	0	0	0	1	Figures: (6) It does not have figures or have figures than not belong to above class Nitrogen Isotherm: No	6	6	TN	TN	TN	TN	TN	TP
10.1021/acs.inorgchem.5b02973	Supporting Information	12	0	0	0	0	0	1	Figures: (6) It does not have figures or have figures that do not belong to the above class Nitrogen Isotherm: No	6	6	TN	TN	TN	TN	TN	TP
10.1021/acs.inorgchem.5b02973	Supporting Information	13	0	0	0	0	0	1	Figures: (6) It does not have figures or have figures than not belong to above class Nitrogen Isotherm: No	6	6	TN	TN	TN	TN	TN	TP
10.1021/acs.inorgchem.5b02973	Supporting Information	14	0	0	0	0	0	1	Figures: (6) It does not have figures or have figures than not belong to above class Nitrogen Isotherm: No	6	6	TN	TN	TN	TN	TN	TP
10.1021/acs.inorgchem.5b02973	Supporting Information	15	0	0	0	0	0	1	Figures: (6) It does not have figures or have figures than not belong to above class Nitrogen Isotherm: No	6	6	TN	TN	TN	TN	TN	TP
10.1021/acs.inorgchem.5b02973	Supporting Information	16	0	0	0	0	0	1	Figures: (6) It does not have figures or have figures than not belong to above class Nitrogen Isotherm: No	6	6	TN	TN	TN	TN	TN	TP
10.1021/acs.inorgchem.5b02973	Main	1	0	0	0	1	0	0	Figures: (4);(5)_x000D_ Nitrogen Isotherm: No	4	45	TN	TN	TN	TP	FP	TN
10.1021/acs.inorgchem.5b02973	Main	2	0	1	0	1	0	0	Figures: (2);(4)_x000D_ Nitrogen Isotherm: No	24	24	TN	TP	TN	TP	TN	TN
10.1021/acs.inorgchem.5b02973	Main	3	0	1	0	0	1	0	Figures: (2);(5)_x000D_ Nitrogen Isotherm: Figure 3_x000D_ Compound: Cu-MOF (1), Pd@Cu-MOF (2)_x000D_ Porosity: N/A_x000D_ Hysteresis: Yes_x000D_ Saturation: 600 - 800 cm??/g for Cu-MOF (1) adsorption, 200 - 400 cm??/g for Pd@Cu-MOF (2) adsorption_x000D_ Position: (0.05, 0.53, 0.53, 0.81)	25	25	TN	TP	TN	TN	TP	TN
10.1021/acs.inorgchem.5b02973	Main	4	0	0	0	0	0	1	Figures: (6) It does not have figures or have figures than not belong to above class Nitrogen Isotherm: No	6	6	TN	TN	TN	TN	TN	TP
10.1021/acs.inorgchem.5b02973	Main	5	0	1	0	0	0	0	Figures: (2);(6) Nitrogen Isotherm: No	2	26	TN	TP	TN	TN	TN	FP
10.1021/acs.inorgchem.5b02973	Main	6	0	0	0	0	0	1	Figures: (6) It does not have figures or have figures than not belong to above class Nitrogen Isotherm: No	6	6	TN	TN	TN	TN	TN	TP
10.1021/acs.inorgchem.5b02973	Main	7	0	0	0	0	0	1	Figures: (6) It does not have figures or have figures that not belong to the above class_x000D_ Nitrogen Isotherm: No	6	6	TN	TN	TN	TN	TN	TP
10.1021/acs.inorgchem.6b00081	Supporting Information	1	0	0	0	0	0	1	Figures: [Answer: (6) It does not have figures or have figures that not belong to above class]_x000D_ Nitrogen Isotherm: No	6	6	TN	TN	TN	TN	TN	TP
10.1021/acs.inorgchem.6b00081	Supporting Information	2	0	0	0	0	0	1	Figures: (6) It does not have figures or have figures than not belong to above class_x000D_ Nitrogen Isotherm: No	6	6	TN	TN	TN	TN	TN	TP
10.1021/acs.inorgchem.6b00081	Supporting Information	3	0	0	0	0	0	1	Figures: [Answer: (6) It does not have figures or have figures than not belong to above class]_x000D_ Nitrogen Isotherm: No	6	6	TN	TN	TN	TN	TN	TP
10.1021/acs.inorgchem.6b00081	Supporting Information	4	0	0	0	1	0	0	Figures: (4)_x000D_ Nitrogen Isotherm: No	4	4	TN	TN	TN	TP	TN	TN
10.1021/acs.inorgchem.6b00081	Supporting Information	5	0	0	0	1	0	0	Figures: (4) Crystal structure or topology illustration_x000D_ Nitrogen Isotherm: No	4	4	TN	TN	TN	TP	TN	TN
10.1021/acs.inorgchem.6b00081	Supporting Information	6	0	0	0	1	0	0	Figures: (4)_x000D_ Nitrogen Isotherm: No	4	4	TN	TN	TN	TP	TN	TN
10.1021/acs.inorgchem.6b00081	Supporting Information	7	0	1	1	0	0	0	Figures: (3);(2)_x000D_ Nitrogen Isotherm: No	23	23	TN	TP	TP	TN	TN	TN
10.1021/acs.inorgchem.6b00081	Supporting Information	8	0	1	0	0	0	0	Figures: (2)_x000D_ Nitrogen Isotherm: No	2	2	TN	TP	TN	TN	TN	TN
10.1021/acs.inorgchem.6b00081	Supporting Information	9	1	0	0	0	1	0	Figures: (1);(5)_x000D_ Nitrogen Isotherm: Figure S8_x000D_ Compound: 1, 2, 3_x000D_ Porosity: N/A_x000D_ Hysteresis: Yes_x000D_ Saturation: 160 - 180 cm3/g_x000D_ Position: (0, 0, 1, 0.55)	15	15	TP	TN	TN	TN	TP	TN
10.1021/acs.inorgchem.6b00081	Supporting Information	10	0	0	0	0	1	0	Figures: (5)_x000D_ Nitrogen Isotherm: Figure S10_x000D_ Compound: Compound 3_x000D_ Porosity: N/A_x000D_ Hysteresis: I do not know_x000D_ Saturation: 60-80 cm^3/g_x000D_ Position: (0.1, 0.55, 0.9, 1)	5	5	TN	TN	TN	TN	TP	TN
10.1021/acs.inorgchem.6b00081	Main	1	0	0	0	1	0	0	Figures: (4);(6)_x000D_ Nitrogen Isotherm: No	4	46	TN	TN	TN	TP	TN	FP
10.1021/acs.inorgchem.6b00081	Main	2	0	0	0	1	0	0	Figures: (4);(6) Nitrogen Isotherm: No	4	46	TN	TN	TN	TP	TN	FP
10.1021/acs.inorgchem.6b00081	Main	3	0	0	0	1	0	0	Figures: (4) Crystal structure or topology illustration Nitrogen Isotherm: No	4	4	TN	TN	TN	TP	TN	TN
10.1021/acs.inorgchem.6b00081	Main	4	0	0	0	0	1	0	Figures: [Answer: (5)]_x000D_ Nitrogen Isotherm: No	5	5	TN	TN	TN	TN	TP	TN
10.1021/acs.inorgchem.6b00081	Main	5	0	0	0	0	0	1	Figures: (6) It does not have figures or have figures than not belong to above class_x000D_ Nitrogen Isotherm: No	6	6	TN	TN	TN	TN	TN	TP
10.1021/acs.inorgchem.6b00136	Supporting Information	1	0	0	0	0	0	1	Figures: (6) It does not have figures or have figures than not belong to above class_x000D_ Nitrogen Isotherm: No	6	6	TN	TN	TN	TN	TN	TP
10.1021/acs.inorgchem.6b00136	Supporting Information	2	0	0	0	0	0	1	Figures: (6) It does not have figures or have figures than not belong to above class Nitrogen Isotherm: No	6	6	TN	TN	TN	TN	TN	TP
10.1021/acs.inorgchem.6b00136	Supporting Information	3	0	0	0	0	0	1	Figures: (6) It does not have figures or have figures than not belong to above class Nitrogen Isotherm: No	6	6	TN	TN	TN	TN	TN	TP
10.1021/acs.inorgchem.6b00136	Supporting Information	4	0	0	0	0	0	1	Figures: (6) It does not have figures or have figures than not belong to above class Nitrogen Isotherm: No	6	6	TN	TN	TN	TN	TN	TP
10.1021/acs.inorgchem.6b00136	Supporting Information	5	0	0	0	1	0	0	Figures: (4) Crystal structure or topology illustration Nitrogen Isotherm: No	4	4	TN	TN	TN	TP	TN	TN
10.1021/acs.inorgchem.6b00136	Supporting Information	6	0	0	0	1	0	0	Figures: (4) Nitrogen Isotherm: No	4	4	TN	TN	TN	TP	TN	TN
10.1021/acs.inorgchem.6b00136	Supporting Information	7	0	0	0	0	1	0	Figures: (5) Nitrogen Isotherm: No Compound: N/A Porosity: N/A Hysteresis: N/A Saturation: N/A Position: N/A	5	5	TN	TN	TN	TN	TP	TN
10.1021/acs.inorgchem.6b00136	Supporting Information	8	0	0	0	0	1	0	Figures: (5) Nitrogen Isotherm: No	5	5	TN	TN	TN	TN	TP	TN
10.1021/acs.inorgchem.6b00136	Supporting Information	9	0	0	0	0	1	0	Figures: (5) Other gas sorption isotherm (e.g. water vapor, CO2, H2, CH4, etc.) Nitrogen Isotherm: No	5	5	TN	TN	TN	TN	TP	TN
10.1021/acs.inorgchem.6b00136	Supporting Information	10	0	1	0	0	1	0	Figures: (2);(5) Nitrogen Isotherm: No	25	25	TN	TP	TN	TN	TP	TN
10.1021/acs.inorgchem.6b00136	Supporting Information	11	0	0	1	0	0	0	Figures: (3) Nitrogen Isotherm: Figure S12 a,b,c,d Compound: afteractivated MOF-sim, MOF-sim, MOF-pim, MOF-2im Porosity: N/A Hysteresis: No Saturation: a) 20 - 30 cm3/g b) 20 - 30 cm3/g c) 20 - 30 cm3/g d) 20 - 30 cm3/g Position: (0, 0, 1, 0.7)	3	3	TN	TN	TP	TN	TN	TN
10.1021/acs.inorgchem.6b00136	Main	1	0	0	0	1	0	0	Figures: (6) It does not have figures or have figures that not belong to the above class Nitrogen Isotherm: No	4	6	TN	TN	TN	FN	TN	FP
10.1021/acs.inorgchem.6b00136	Main	2	0	0	0	1	0	0	Figures: (4)_x000D_ Nitrogen Isotherm: No	4	4	TN	TN	TN	TP	TN	TN
10.1021/acs.inorgchem.6b00136	Main	3	1	0	0	0	1	0	Figures: (1);(5) Nitrogen Isotherm: Figure 4 Compound: 1-min, 1-eim, 1-pim, 1-buim Porosity: Surface area values are provided for the compounds: 1-min, 940.26 m^2 g^-1; 1-eim, 871.47 m^2 g^-1; 1-pim, 839.04 m^2 g^-1; 1-buim, 769.67 m^2 g^-1. Hysteresis: Yes Saturation: 280 - 320 cm^3/g Position: (0,0.32,0.54,0.62)	15	15	TP	TN	TN	TN	TP	TN
10.1021/acs.inorgchem.6b00136	Main	4	0	0	0	0	1	0	Figures: (5) Nitrogen Isotherm: No Compound: N/A Porosity: N/A Hysteresis: No Saturation: N/A Position: N/A	5	5	TN	TN	TN	TN	TP	TN
10.1021/acs.inorgchem.6b00136	Main	5	0	0	0	0	0	1	Figures: (6) It does not have figures or have figures than not belong to the above class_x000D_ Nitrogen Isotherm: No	6	6	TN	TN	TN	TN	TN	TP
10.1021/acs.inorgchem.6b00276	Supporting Information	1	0	0	0	0	0	1	Figures: (6) It does not have figures or have figures than not belong to above class_x000D_ Nitrogen Isotherm: No	6	6	TN	TN	TN	TN	TN	TP
10.1021/acs.inorgchem.6b00276	Supporting Information	2	0	0	0	0	0	1	Figures: (6) It does not have figures or have figures than not belong to above class Nitrogen Isotherm: No	6	6	TN	TN	TN	TN	TN	TP
10.1021/acs.inorgchem.6b00276	Supporting Information	3	0	0	0	0	0	1	Figures: (6) It does not have figures or have figures than not belong to above class Nitrogen Isotherm: No	6	6	TN	TN	TN	TN	TN	TP
10.1021/acs.inorgchem.6b00276	Supporting Information	4	0	0	0	0	0	1	Figures: [Answer: (6) It does not have figures or have figures than not belong to above class] Nitrogen Isotherm: No	6	6	TN	TN	TN	TN	TN	TP
10.1021/acs.inorgchem.6b00276	Supporting Information	5	0	0	0	0	0	1	Figures: [Answer: (6) It does not have figures or have figures than not belong to above class] Nitrogen Isotherm: No	6	6	TN	TN	TN	TN	TN	TP
10.1021/acs.inorgchem.6b00276	Supporting Information	6	0	0	0	0	0	1	Figures: (6) It does not have figures or have figures than not belong to the above class Nitrogen Isotherm: No	6	6	TN	TN	TN	TN	TN	TP
10.1021/acs.inorgchem.6b00276	Supporting Information	7	0	0	0	0	0	1	Figures: [Answer: (6) It does not have figures or have figures than not belong to above class] Nitrogen Isotherm: No	6	6	TN	TN	TN	TN	TN	TP
10.1021/acs.inorgchem.6b00276	Supporting Information	8	0	0	0	0	0	1	Figures: [Answer: (6) It does not have figures or have figures than not belong to above class] Nitrogen Isotherm: No	6	6	TN	TN	TN	TN	TN	TP
10.1021/acs.inorgchem.6b00276	Supporting Information	9	0	0	0	0	0	1	Figures: (6) It does not have figures or have figures than not belong to above class Nitrogen Isotherm: No	6	6	TN	TN	TN	TN	TN	TP
10.1021/acs.inorgchem.6b00276	Supporting Information	10	0	0	0	0	0	1	Figures: (6) It does not have figures or have figures than not belong to above class Nitrogen Isotherm: No	6	6	TN	TN	TN	TN	TN	TP
10.1021/acs.inorgchem.6b00276	Supporting Information	11	0	0	0	0	0	1	Figures: (6) It does not have figures or have figures than not belong to above class Nitrogen Isotherm: No	6	6	TN	TN	TN	TN	TN	TP
10.1021/acs.inorgchem.6b00276	Supporting Information	12	0	0	0	0	0	1	Figures: [Answer: (6) It does not have figures or have figures that not belong to the above class]_x000D_ Nitrogen Isotherm: No	6	6	TN	TN	TN	TN	TN	TP
10.1021/acs.inorgchem.6b00276	Supporting Information	13	0	0	0	0	0	1	Figures: (6) It does not have figures or have figures than not belong to above class Nitrogen Isotherm: No	6	6	TN	TN	TN	TN	TN	TP
10.1021/acs.inorgchem.6b00276	Supporting Information	14	0	0	0	0	0	1	Figures: (6) It does not have figures or have figures than not belong to above class_x000D_ Nitrogen Isotherm: No	6	6	TN	TN	TN	TN	TN	TP
10.1021/acs.inorgchem.6b00276	Supporting Information	15	0	0	0	0	0	1	Figures: (6) It does not have figures or have figures than not belong to above class_x000D_ Nitrogen Isotherm: No	6	6	TN	TN	TN	TN	TN	TP
10.1021/acs.inorgchem.6b00276	Supporting Information	16	0	0	0	0	0	1	Analyzing the provided image... Figures: (6) It does not have figures or have figures than not belong to above class Nitrogen Isotherm: No	6	6	TN	TN	TN	TN	TN	TP
10.1021/acs.inorgchem.6b00276	Supporting Information	17	0	0	0	0	0	1	Figures: (6) It does not have figures or have figures than not belong to above class_x000D_ Nitrogen Isotherm: No	6	6	TN	TN	TN	TN	TN	TP
10.1021/acs.inorgchem.6b00276	Supporting Information	18	0	0	0	0	0	1	Figures: (6) It does not have figures or have figures than not belong to above class_x000D_ Nitrogen Isotherm: No	6	6	TN	TN	TN	TN	TN	TP
10.1021/acs.inorgchem.6b00276	Supporting Information	19	0	0	0	0	0	1	Figures: (6) It does not have figures or have figures than not belong to above class Nitrogen Isotherm: No	6	6	TN	TN	TN	TN	TN	TP
10.1021/acs.inorgchem.6b00276	Supporting Information	20	0	0	0	0	0	1	Figures: (6) It does not have figures or have figures than not belong to above class Nitrogen Isotherm: No	6	6	TN	TN	TN	TN	TN	TP
10.1021/acs.inorgchem.6b00276	Supporting Information	21	0	0	0	0	0	1	Figures: (6) It does not have figures or have figures than not belong to above class Nitrogen Isotherm: No	6	6	TN	TN	TN	TN	TN	TP
10.1021/acs.inorgchem.6b00276	Supporting Information	22	0	0	0	0	0	1	Figures: (6) It does not have figures or have figures than not belong to above class_x000D_ Nitrogen Isotherm: No	6	6	TN	TN	TN	TN	TN	TP
10.1021/acs.inorgchem.6b00276	Supporting Information	23	0	0	0	0	0	1	Figures: (6) It does not have figures or have figures than not belong to above class Nitrogen Isotherm: No	6	6	TN	TN	TN	TN	TN	TP
10.1021/acs.inorgchem.6b00276	Supporting Information	24	0	0	0	0	0	1	Figures: (6) It does not have figures or have figures than not belong to the above class Nitrogen Isotherm: No	6	6	TN	TN	TN	TN	TN	TP
10.1021/acs.inorgchem.6b00276	Supporting Information	25	0	0	0	0	0	1	Figures: (6) It does not have figures or have figures than not belong to above class Nitrogen Isotherm: No	6	6	TN	TN	TN	TN	TN	TP
10.1021/acs.inorgchem.6b00276	Supporting Information	26	0	0	0	0	0	1	Figures: (6) It does not have figures or have figures than not belong to above class Nitrogen Isotherm: No	6	6	TN	TN	TN	TN	TN	TP
10.1021/acs.inorgchem.6b00276	Supporting Information	27	0	0	0	0	0	1	Figures: (6) It does not have figures or have figures than not belong to above class Nitrogen Isotherm: No	6	6	TN	TN	TN	TN	TN	TP
10.1021/acs.inorgchem.6b00276	Supporting Information	28	0	0	0	0	0	1	Figures: (6) It does not have figures or have figures that do not belong to the above class_x000D_ Nitrogen Isotherm: No	6	6	TN	TN	TN	TN	TN	TP
10.1021/acs.inorgchem.6b00276	Supporting Information	29	0	0	0	0	0	1	Figures: (6) It does not have figures or have figures than not belong to above class_x000D_ Nitrogen Isotherm: No	6	6	TN	TN	TN	TN	TN	TP
10.1021/acs.inorgchem.6b00276	Supporting Information	30	0	0	0	0	0	1	Figures: (6) It does not have figures or have figures than not belong to above class Nitrogen Isotherm: No	6	6	TN	TN	TN	TN	TN	TP
10.1021/acs.inorgchem.6b00276	Supporting Information	31	0	0	0	0	0	1	Figures: (6) It does not have figures or have figures than not belong to above class Nitrogen Isotherm: No	6	6	TN	TN	TN	TN	TN	TP
10.1021/acs.inorgchem.6b00276	Supporting Information	32	0	0	0	0	0	1	Figures: (6) It does not have figures or have figures that not belong to the above class._x000D_ Nitrogen Isotherm: No	6	6	TN	TN	TN	TN	TN	TP
10.1021/acs.inorgchem.6b00276	Supporting Information	33	0	0	0	0	0	1	Figures: (6) It does not have figures or have figures than not belong to above class_x000D_ Nitrogen Isotherm: No	6	6	TN	TN	TN	TN	TN	TP
10.1021/acs.inorgchem.6b00276	Supporting Information	34	0	0	0	0	0	1	Figures: (6) It does not have figures or have figures than not belong to above class_x000D_ Nitrogen Isotherm: No	6	6	TN	TN	TN	TN	TN	TP
10.1021/acs.inorgchem.6b00276	Supporting Information	35	0	0	0	0	0	1	Figures: (6) It does not have figures or have figures than not belong to above class_x000D_ Nitrogen Isotherm: No	6	6	TN	TN	TN	TN	TN	TP
10.1021/acs.inorgchem.6b00276	Supporting Information	36	0	0	1	0	0	0	Figures: (3)_x000D_ Nitrogen Isotherm: No	3	3	TN	TN	TP	TN	TN	TN
10.1021/acs.inorgchem.6b00276	Supporting Information	37	0	0	1	0	0	0	Figures: (3)_x000D_ Nitrogen Isotherm: Figure S41; Figure S42_x000D_ Compound: 23, 24, 25 as synthesized, 26 as synthesized, 26 after N2 sorption_x000D_ Porosity: N/A_x000D_ Hysteresis: I do not know_x000D_ Saturation: Figure S41: 80-90%; Figure S42: 80-90% for 25 as synthesized and 26 as synthesized, 50-60% for 26 after N2 sorption_x000D_ Position: (0,0,1,0.5) for Figure S41; (0,0.5,1,1) for Fig…	3	3	TN	TN	TP	TN	TN	TN
10.1021/acs.inorgchem.6b00276	Supporting Information	38	1	0	0	0	0	0	Figures: (1)_x000D_ Nitrogen Isotherm: Figure S43; Figure S44_x000D_ Compound: Zr-MOF 23 and 24; Zr-MOF 25 and 26_x000D_ Porosity: N/A_x000D_ Hysteresis: Yes_x000D_ Saturation: Figure S43: 300 - 400 cm3/g; Figure S44: 250 - 300 cm3/g_x000D_ Position: (0, 0, 1, 0.55)	1	1	TP	TN	TN	TN	TN	TN
10.1021/acs.inorgchem.6b00276	Supporting Information	39	0	0	0	0	1	0	Figures: (5) Other gas sorption isotherm (e.g. water vapor, CO2, H2, CH4, etc.)_x000D_ Nitrogen Isotherm: No	5	5	TN	TN	TN	TN	TP	TN
10.1021/acs.inorgchem.6b00276	Supporting Information	40	0	0	0	1	0	0	Figures: (4)_x000D_ Nitrogen Isotherm: No	4	4	TN	TN	TN	TP	TN	TN
10.1021/acs.inorgchem.6b00276	Supporting Information	41	0	0	0	1	0	0	Figures: (4) Crystal structure or topology illustration_x000D_ Nitrogen Isotherm: No	4	4	TN	TN	TN	TP	TN	TN
10.1021/acs.inorgchem.6b00276	Supporting Information	42	0	0	0	1	0	0	Figures: (4) Crystal structure or topology illustration_x000D_ Nitrogen Isotherm: No	4	4	TN	TN	TN	TP	TN	TN
10.1021/acs.inorgchem.6b00276	Supporting Information	43	0	0	0	1	0	0	Figures: (4) Crystal structure or topology illustration_x000D_ Nitrogen Isotherm: No	4	4	TN	TN	TN	TP	TN	TN
10.1021/acs.inorgchem.6b00276	Supporting Information	44	0	0	0	1	0	0	Figures: (4) Crystal structure or topology illustration Nitrogen Isotherm: No	4	4	TN	TN	TN	TP	TN	TN
10.1021/acs.inorgchem.6b00276	Supporting Information	45	0	0	0	1	0	0	Figures: (4) Crystal structure or topology illustration Nitrogen Isotherm: No	4	4	TN	TN	TN	TP	TN	TN
10.1021/acs.inorgchem.6b00276	Supporting Information	46	0	0	0	0	0	1	Figures: (6) It does not have figures or have figures that not belong to above class Nitrogen Isotherm: No	6	6	TN	TN	TN	TN	TN	TP
10.1021/acs.inorgchem.6b00276	Supporting Information	47	0	0	0	0	0	1	Figures: (6) It does not have figures or have figures than not belong to above class Nitrogen Isotherm: No	6	6	TN	TN	TN	TN	TN	TP
10.1021/acs.inorgchem.6b00276	Supporting Information	48	0	0	0	0	0	1	Figures: (6) It does not have figures or have figures than not belong to above class Nitrogen Isotherm: No	6	6	TN	TN	TN	TN	TN	TP
10.1021/acs.inorgchem.6b00276	Supporting Information	49	0	0	0	0	0	1	Figures: (6) It does not have figures or have figures than not belong to above class Nitrogen Isotherm: No	6	6	TN	TN	TN	TN	TN	TP
10.1021/acs.inorgchem.6b00276	Supporting Information	50	0	1	0	0	0	0	Figures: (2) Nitrogen Isotherm: No	2	2	TN	TP	TN	TN	TN	TN
10.1021/acs.inorgchem.6b00276	Supporting Information	51	0	0	0	0	0	1	Figures: [Answer: (6)] Nitrogen Isotherm: No	6	6	TN	TN	TN	TN	TN	TP
10.1021/acs.inorgchem.6b00276	Main	1	0	0	0	0	0	1	Figures: (6) It does not have figures or have figures than not belong to above class Nitrogen Isotherm: No	6	6	TN	TN	TN	TN	TN	TP
10.1021/acs.inorgchem.6b00276	Main	2	0	0	0	0	0	1	Figures: (6) It does not have figures or have figures than not belong to above class Nitrogen Isotherm: No	6	6	TN	TN	TN	TN	TN	TP
10.1021/acs.inorgchem.6b00276	Main	3	0	0	0	1	0	0	Figures: (4) Nitrogen Isotherm: No	4	4	TN	TN	TN	TP	TN	TN
10.1021/acs.inorgchem.6b00276	Main	4	0	0	0	1	0	0	Figures: [Answer: (4)] Nitrogen Isotherm: No	4	4	TN	TN	TN	TP	TN	TN
10.1021/acs.inorgchem.6b00276	Main	5	0	0	0	1	0	0	Figures: (4) Nitrogen Isotherm: No	4	4	TN	TN	TN	TP	TN	TN
10.1021/acs.inorgchem.6b00276	Main	6	0	0	0	1	0	0	Figures: (4);(6) Nitrogen Isotherm: No	4	46	TN	TN	TN	TP	TN	FP
10.1021/acs.inorgchem.6b00276	Main	7	0	0	0	1	0	0	Figures: (4) Nitrogen Isotherm: No	4	4	TN	TN	TN	TP	TN	TN
10.1021/acs.inorgchem.6b00276	Main	8	0	0	0	0	0	1	Figures: (6) It does not have figures or have figures than not belong to above class Nitrogen Isotherm: No	6	6	TN	TN	TN	TN	TN	TP
10.1021/acs.inorgchem.6b00276	Main	9	0	0	0	0	0	1	Figures: (6) It does not have figures or have figures than not belong to above class Nitrogen Isotherm: No	6	6	TN	TN	TN	TN	TN	TP
10.1021/acs.inorgchem.6b00276	Main	10	0	0	0	0	0	1	Figures: (6) It does not have figures or have figures than not belong to above class Nitrogen Isotherm: No	6	6	TN	TN	TN	TN	TN	TP
10.1021/acs.inorgchem.6b00433	Supporting Information	1	0	0	0	0	0	1	Figures: (6) It does not have figures or have figures than not belong to above class Nitrogen Isotherm: No	6	6	TN	TN	TN	TN	TN	TP
10.1021/acs.inorgchem.6b00433	Supporting Information	2	0	0	0	0	0	1	Figures: (6) It does not have figures or have figures than not belong to above class Nitrogen Isotherm: No	6	6	TN	TN	TN	TN	TN	TP
10.1021/acs.inorgchem.6b00433	Supporting Information	3	0	0	0	0	0	1	Figures: (6) It does not have figures or have figures than not belong to above class Nitrogen Isotherm: No	6	6	TN	TN	TN	TN	TN	TP
10.1021/acs.inorgchem.6b00433	Supporting Information	4	0	0	0	0	0	1	Figures: (6) It does not have figures or have figures than not belong to above class Nitrogen Isotherm: No	6	6	TN	TN	TN	TN	TN	TP
10.1021/acs.inorgchem.6b00433	Supporting Information	5	0	0	0	0	0	1	Figures: (6) It does not have figures or have figures than not belong to above class Nitrogen Isotherm: No	6	6	TN	TN	TN	TN	TN	TP
10.1021/acs.inorgchem.6b00433	Supporting Information	6	0	0	0	0	0	1	Figures: [Answer: (6) It does not have figures or have figures than not belong to above class] Nitrogen Isotherm: No	6	6	TN	TN	TN	TN	TN	TP
10.1021/acs.inorgchem.6b00433	Supporting Information	7	0	0	0	0	0	1	Figures: (6) It does not have figures or have figures than not belong to above class Nitrogen Isotherm: No	6	6	TN	TN	TN	TN	TN	TP
10.1021/acs.inorgchem.6b00433	Supporting Information	8	0	0	0	0	0	1	Figures: (6) It does not have figures or have figures than not belong to above class Nitrogen Isotherm: No	6	6	TN	TN	TN	TN	TN	TP
10.1021/acs.inorgchem.6b00433	Supporting Information	9	0	0	0	0	0	1	Figures: (6) It does not have figures or have figures than not belong to above class Nitrogen Isotherm: No	6	6	TN	TN	TN	TN	TN	TP
10.1021/acs.inorgchem.6b00433	Supporting Information	10	0	0	0	0	0	1	Figures: [Answer: (6) It does not have figures or have figures than not belong to above class] Nitrogen Isotherm: No	6	6	TN	TN	TN	TN	TN	TP
10.1021/acs.inorgchem.6b00433	Supporting Information	11	0	0	0	0	0	1	Figures: (6) It does not have figures or have figures than not belong to above class Nitrogen Isotherm: No	6	6	TN	TN	TN	TN	TN	TP
10.1021/acs.inorgchem.6b00433	Supporting Information	12	0	0	0	0	0	1	Figures: (6) It does not have figures or have figures than not belong to above class Nitrogen Isotherm: No	6	6	TN	TN	TN	TN	TN	TP
10.1021/acs.inorgchem.6b00433	Supporting Information	13	0	0	0	0	0	1	Figures: [Answer: (6) It does not have figures or have figures than not belong to above class] Nitrogen Isotherm: No	6	6	TN	TN	TN	TN	TN	TP
10.1021/acs.inorgchem.6b00433	Supporting Information	14	0	0	0	0	0	1	Figures: (6) It does not have figures or have figures than not belong to above class Nitrogen Isotherm: No	6	6	TN	TN	TN	TN	TN	TP
10.1021/acs.inorgchem.6b00433	Supporting Information	15	0	0	0	0	0	1	Figures: (6) It does not have figures or have figures than not belong to above class Nitrogen Isotherm: No	6	6	TN	TN	TN	TN	TN	TP
10.1021/acs.inorgchem.6b00433	Supporting Information	16	0	0	0	1	0	0	Figures: (4) Nitrogen Isotherm: No	4	4	TN	TN	TN	TP	TN	TN
10.1021/acs.inorgchem.6b00433	Supporting Information	17	0	0	0	0	0	1	Figures: (6) It does not have figures or have figures than not belong to above class Nitrogen Isotherm: No	6	6	TN	TN	TN	TN	TN	TP
10.1021/acs.inorgchem.6b00433	Supporting Information	18	0	0	0	1	0	0	Figures: (4) Nitrogen Isotherm: No	4	4	TN	TN	TN	TP	TN	TN
10.1021/acs.inorgchem.6b00433	Supporting Information	19	0	0	0	1	0	0	Figures: (4) Crystal structure or topology illustration Nitrogen Isotherm: No	4	4	TN	TN	TN	TP	TN	TN
10.1021/acs.inorgchem.6b00433	Supporting Information	20	0	0	0	1	0	0	Figures: (4) Nitrogen Isotherm: No	4	4	TN	TN	TN	TP	TN	TN
10.1021/acs.inorgchem.6b00433	Supporting Information	21	0	1	0	0	0	0	Figures: (2) Nitrogen Isotherm: No	2	2	TN	TP	TN	TN	TN	TN
10.1021/acs.inorgchem.6b00433	Supporting Information	22	0	1	0	0	0	0	Figures: (2) Nitrogen Isotherm: No	2	2	TN	TP	TN	TN	TN	TN
10.1021/acs.inorgchem.6b00433	Supporting Information	23	0	0	0	1	0	0	Figures: (4) Nitrogen Isotherm: No	4	4	TN	TN	TN	TP	TN	TN
10.1021/acs.inorgchem.6b00433	Supporting Information	24	0	0	0	1	0	0	Figures: (4) Crystal structure or topology illustration Nitrogen Isotherm: No	4	4	TN	TN	TN	TP	TN	TN
10.1021/acs.inorgchem.6b00433	Supporting Information	25	0	0	0	1	0	0	Figures: (4) Crystal structure or topology illustration_x000D_ Nitrogen Isotherm: No	4	4	TN	TN	TN	TP	TN	TN
10.1021/acs.inorgchem.6b00433	Supporting Information	26	0	0	0	0	0	1	Figures: (6) It does not have figures or have figures than not belong to above class Nitrogen Isotherm: No	6	6	TN	TN	TN	TN	TN	TP
10.1021/acs.inorgchem.6b00433	Supporting Information	27	0	0	0	0	0	1	Figures: (6) It does not have figures or have figures than not belong to the above class Nitrogen Isotherm: No	6	6	TN	TN	TN	TN	TN	TP
10.1021/acs.inorgchem.6b00433	Supporting Information	28	0	0	0	0	0	1	Figures: (6) It does not have figures or have figures than not belong to the above class Nitrogen Isotherm: No	6	6	TN	TN	TN	TN	TN	TP
10.1021/acs.inorgchem.6b00433	Supporting Information	29	0	0	0	0	0	1	Figures: (6) It does not have figures or have figures than not belong to the above class. Nitrogen Isotherm: No	6	6	TN	TN	TN	TN	TN	TP
10.1021/acs.inorgchem.6b00433	Supporting Information	30	0	0	0	0	0	1	Figures: (6) It does not have figures or have figures than not belong to above class_x000D_ Nitrogen Isotherm: No	6	6	TN	TN	TN	TN	TN	TP
10.1021/acs.inorgchem.6b00433	Supporting Information	31	0	0	0	0	0	1	Figures: (6) It does not have figures or have figures than not belong to the above class. Nitrogen Isotherm: No	6	6	TN	TN	TN	TN	TN	TP
10.1021/acs.inorgchem.6b00433	Supporting Information	32	0	0	0	0	0	1	Figures: (6) It does not have figures or have figures than not belong to above class Nitrogen Isotherm: No	6	6	TN	TN	TN	TN	TN	TP
10.1021/acs.inorgchem.6b00433	Supporting Information	33	0	0	0	0	0	1	Figures: (6) It does not have figures or have figures than not belong to the above class_x000D_ Nitrogen Isotherm: No	6	6	TN	TN	TN	TN	TN	TP
10.1021/acs.inorgchem.6b00433	Supporting Information	34	0	0	0	0	0	1	Figures: (6) It does not have figures or have figures that do not belong to the above class._x000D_ Nitrogen Isotherm: No	6	6	TN	TN	TN	TN	TN	TP
10.1021/acs.inorgchem.6b00433	Supporting Information	35	0	0	0	0	0	1	Figures: (6) It does not have figures or have figures than not belong to above class_x000D_ Nitrogen Isotherm: No	6	6	TN	TN	TN	TN	TN	TP
10.1021/acs.inorgchem.6b00433	Supporting Information	36	0	0	0	0	0	1	Figures: (6) It does not have figures or have figures than not belong to the above class_x000D_ Nitrogen Isotherm: No	6	6	TN	TN	TN	TN	TN	TP
10.1021/acs.inorgchem.6b00433	Supporting Information	37	0	0	0	0	0	1	Figures: (6) It does not have figures or have figures than not belong to above class_x000D_ Nitrogen Isotherm: No	6	6	TN	TN	TN	TN	TN	TP
10.1021/acs.inorgchem.6b00433	Supporting Information	38	0	0	0	0	0	1	Figures: (6) It does not have figures or have figures than not belong to above class_x000D_ Nitrogen Isotherm: No	6	6	TN	TN	TN	TN	TN	TP
10.1021/acs.inorgchem.6b00433	Supporting Information	39	0	0	0	0	0	1	Figures: (6) It does not have figures or have figures that do not belong to the above class_x000D_ Nitrogen Isotherm: No	6	6	TN	TN	TN	TN	TN	TP
10.1021/acs.inorgchem.6b00433	Supporting Information	40	0	0	0	0	0	1	Figures: (6) It does not have figures or have figures than not belong to above class_x000D_ Nitrogen Isotherm: No	6	6	TN	TN	TN	TN	TN	TP
10.1021/acs.inorgchem.6b00433	Supporting Information	41	0	0	0	0	0	1	Figures: (6) It does not have figures or have figures than not belong to above class_x000D_ Nitrogen Isotherm: No	6	6	TN	TN	TN	TN	TN	TP
10.1021/acs.inorgchem.6b00433	Supporting Information	42	0	0	0	0	0	1	Figures: (6) It does not have figures or have figures than not belong to above class_x000D_ Nitrogen Isotherm: No	6	6	TN	TN	TN	TN	TN	TP
10.1021/acs.inorgchem.6b00433	Supporting Information	43	0	0	0	0	0	1	Figures: (6) It does not have figures or have figures that not belong to the above class_x000D_ Nitrogen Isotherm: No	6	6	TN	TN	TN	TN	TN	TP
10.1021/acs.inorgchem.6b00433	Supporting Information	44	0	0	0	0	0	1	Figures: (6) It does not have figures or have figures than not belong to above class_x000D_ Nitrogen Isotherm: No	6	6	TN	TN	TN	TN	TN	TP
10.1021/acs.inorgchem.6b00433	Supporting Information	45	0	0	0	0	0	1	Figures: (6) It does not have figures or have figures than not belong to above class_x000D_ Nitrogen Isotherm: No	6	6	TN	TN	TN	TN	TN	TP
10.1021/acs.inorgchem.6b00433	Supporting Information	46	0	0	0	0	0	1	Figures: (6) It does not have figures or have figures than not belong to above class_x000D_ Nitrogen Isotherm: No	6	6	TN	TN	TN	TN	TN	TP
10.1021/acs.inorgchem.6b00433	Supporting Information	47	0	0	0	0	0	1	Figures: (6) It does not have figures or have figures than not belong to above class_x000D_ Nitrogen Isotherm: No	6	6	TN	TN	TN	TN	TN	TP
10.1021/acs.inorgchem.6b00433	Supporting Information	48	0	0	0	0	0	1	Figures: (6) It does not have figures or have figures than not belong to above class Nitrogen Isotherm: No	6	6	TN	TN	TN	TN	TN	TP
10.1021/acs.inorgchem.6b00433	Supporting Information	49	0	1	0	0	0	0	Figures: (2) Nitrogen Isotherm: No	2	2	TN	TP	TN	TN	TN	TN
10.1021/acs.inorgchem.6b00433	Supporting Information	50	0	0	1	0	0	0	Figures: (3) Nitrogen Isotherm: Figure S33 Compound: 1 Porosity: N/A Hysteresis: I do not know Saturation: 80-100% Position: (0,0,1,0.8)	3	3	TN	TN	TP	TN	TN	TN
10.1021/acs.inorgchem.6b00433	Supporting Information	51	0	0	1	0	0	0	Figures: (3)_x000D_ Nitrogen Isotherm: No	3	3	TN	TN	TP	TN	TN	TN
10.1021/acs.inorgchem.6b00433	Supporting Information	52	0	0	0	0	0	1	Figures: (6) It does not have figures or have figures than not belong to above class Nitrogen Isotherm: No	6	6	TN	TN	TN	TN	TN	TP
10.1021/acs.inorgchem.6b00433	Supporting Information	53	0	0	0	0	0	1	Figures: (6) It does not have figures or have figures than not belong to above class Nitrogen Isotherm: No	6	6	TN	TN	TN	TN	TN	TP
10.1021/acs.inorgchem.6b00433	Main	1	0	0	0	0	0	1	Figures: (6) It does not have figures or have figures than not belong to above class Nitrogen Isotherm: No	6	6	TN	TN	TN	TN	TN	TP
10.1021/acs.inorgchem.6b00433	Main	2	0	0	0	1	0	0	Figures: (4);(6) Nitrogen Isotherm: No	4	46	TN	TN	TN	TP	TN	FP
10.1021/acs.inorgchem.6b00433	Main	3	0	0	0	0	0	1	Figures: [Answer: (6) It does not have figures or have figures than not belong to above class]_x000D_ Nitrogen Isotherm: No	6	6	TN	TN	TN	TN	TN	TP
10.1021/acs.inorgchem.6b00894	Supporting Information	1	0	0	0	0	0	1	Figures: (6) It does not have figures or have figures than not belong to above class Nitrogen Isotherm: No	6	6	TN	TN	TN	TN	TN	TP
10.1021/acs.inorgchem.6b00894	Supporting Information	2	0	0	0	0	0	1	Figures: [Answer: (6) It does not have figures or have figures than not belong to above class] Nitrogen Isotherm: No	6	6	TN	TN	TN	TN	TN	TP
10.1021/acs.inorgchem.6b00894	Supporting Information	3	0	0	0	0	0	1	Figures: (6) It does not have figures or have figures than not belong to above class Nitrogen Isotherm: No	6	6	TN	TN	TN	TN	TN	TP
10.1021/acs.inorgchem.6b00894	Supporting Information	4	0	0	0	0	0	1	Figures: [Answer: (6) It does not have figures or have figures that do not belong to the above class] Nitrogen Isotherm: No	6	6	TN	TN	TN	TN	TN	TP
10.1021/acs.inorgchem.6b00894	Supporting Information	5	0	0	0	0	0	1	Figures: (6) It does not have figures or have figures than not belong to above class Nitrogen Isotherm: No	6	6	TN	TN	TN	TN	TN	TP
10.1021/acs.inorgchem.6b00894	Supporting Information	6	0	0	0	0	0	1	Figures: (6) It does not have figures or have figures that do not belong to the above class Nitrogen Isotherm: No	6	6	TN	TN	TN	TN	TN	TP
10.1021/acs.inorgchem.6b00894	Supporting Information	7	0	0	0	0	0	1	Figures: (6) It does not have figures or have figures than not belong to above class Nitrogen Isotherm: No	6	6	TN	TN	TN	TN	TN	TP
10.1021/acs.inorgchem.6b00894	Supporting Information	8	0	0	0	0	0	1	Figures: (6) Nitrogen Isotherm: No	6	6	TN	TN	TN	TN	TN	TP
10.1021/acs.inorgchem.6b00894	Supporting Information	9	0	0	0	0	0	1	Figures: [Answer: (6)] Nitrogen Isotherm: No	6	6	TN	TN	TN	TN	TN	TP
10.1021/acs.inorgchem.6b00894	Supporting Information	10	0	0	0	1	0	0	Figures: (4) Nitrogen Isotherm: No	4	4	TN	TN	TN	TP	TN	TN
10.1021/acs.inorgchem.6b00894	Supporting Information	11	0	0	0	1	0	0	Figures: (4) Nitrogen Isotherm: No	4	4	TN	TN	TN	TP	TN	TN
10.1021/acs.inorgchem.6b00894	Supporting Information	12	0	0	0	1	0	0	Figures: (4) Nitrogen Isotherm: No	4	4	TN	TN	TN	TP	TN	TN
10.1021/acs.inorgchem.6b00894	Supporting Information	13	0	0	0	0	0	1	Figures: (6) It does not have figures or have figures that do not belong to the above class. Nitrogen Isotherm: No	6	6	TN	TN	TN	TN	TN	TP
10.1021/acs.inorgchem.6b00894	Supporting Information	14	0	1	1	0	0	0	Figures: (2);(3)_x000D_ Nitrogen Isotherm: No	23	23	TN	TP	TP	TN	TN	TN
10.1021/acs.inorgchem.6b00894	Supporting Information	15	0	0	0	0	1	0	Figures: (5) Nitrogen Isotherm: No	5	5	TN	TN	TN	TN	TP	TN
10.1021/acs.inorgchem.6b00894	Supporting Information	16	0	0	0	0	1	0	Figures: [Answer: (5)]_x000D_ Nitrogen Isotherm: [Answer: (b) and (c)]_x000D_ Compound: [Answer: MOF 1, MOF 2]_x000D_ Porosity: [Answer: BET=162 m??/g for MOF 1, BET=106 m??/g for MOF 2]_x000D_ Hysteresis: [Answer: Yes]_x000D_ Saturation: [Answer: For (b) ~30-32 cm??/g(STP), For (c) ~20-22 cm??/g(STP)]_x000D_ Position: [Answer: (0.05, 0.15, 0.95, 0.65)]	5	5	TN	TN	TN	TN	TP	TN
10.1021/acs.inorgchem.6b00894	Supporting Information	17	0	0	0	0	0	1	Figures: (6) It does not have figures or have figures than not belong to above class Nitrogen Isotherm: No	6	6	TN	TN	TN	TN	TN	TP
10.1021/acs.inorgchem.6b00894	Supporting Information	18	0	0	0	0	0	1	Figures: (6) It does not have figures or have figures than not belong to above class Nitrogen Isotherm: No	6	6	TN	TN	TN	TN	TN	TP
10.1021/acs.inorgchem.6b00894	Supporting Information	19	0	0	0	0	0	1	Figures: (4) Nitrogen Isotherm: No	6	4	TN	TN	TN	FP	TN	FN
10.1021/acs.inorgchem.6b00894	Supporting Information	20	0	0	0	0	0	1	Figures: (6) It does not have figures or have figures than not belong to above class Nitrogen Isotherm: No	6	6	TN	TN	TN	TN	TN	TP
10.1021/acs.inorgchem.6b00894	Supporting Information	21	0	0	0	0	0	1	Figures: (6) It does not have figures or have figures that not belong to the above class Nitrogen Isotherm: No	6	6	TN	TN	TN	TN	TN	TP
10.1021/acs.inorgchem.6b00894	Supporting Information	22	0	0	0	0	0	1	Figures: (6) It does not have figures or have figures than not belong to above class Nitrogen Isotherm: No	6	6	TN	TN	TN	TN	TN	TP
10.1021/acs.inorgchem.6b00894	Supporting Information	23	0	0	0	0	0	1	Figures: (6) It does not have figures or have figures than not belong to above class Nitrogen Isotherm: No	6	6	TN	TN	TN	TN	TN	TP
10.1021/acs.inorgchem.6b00894	Supporting Information	24	0	0	0	0	0	1	Figures: (6) It does not have figures or have figures than not belong to above class Nitrogen Isotherm: No	6	6	TN	TN	TN	TN	TN	TP
10.1021/acs.inorgchem.6b00894	Supporting Information	25	0	0	0	0	0	1	Figures: (6) It does not have figures or have figures than not belong to above class Nitrogen Isotherm: No	6	6	TN	TN	TN	TN	TN	TP
10.1021/acs.inorgchem.6b00894	Supporting Information	26	0	0	0	0	0	1	Figures: (6) It does not have figures or have figures than not belong to above class Nitrogen Isotherm: No	6	6	TN	TN	TN	TN	TN	TP
10.1021/acs.inorgchem.6b00894	Supporting Information	27	0	0	0	0	0	1	Figures: (5) Nitrogen Isotherm: Yes; displayed in both plots Compound: N/A Porosity: N/A Hysteresis: Yes Saturation: 110,000 - 120,000 mA*bs/g for the top plot; 80,000 - 90,000 mA*bs/g for the bottom plot Position: (0,0.25,1,0.8)	6	5	TN	TN	TN	TN	FP	FN
10.1021/acs.inorgchem.6b00894	Supporting Information	28	0	0	0	0	0	1	Figures: (6) It does not have figures or have figures than not belong to above class Nitrogen Isotherm: No	6	6	TN	TN	TN	TN	TN	TP
10.1021/acs.inorgchem.6b00894	Supporting Information	29	0	0	0	0	0	1	Figures: (6) It does not have figures or have figures than not belong to above class Nitrogen Isotherm: No	6	6	TN	TN	TN	TN	TN	TP
10.1021/acs.inorgchem.6b00894	Supporting Information	30	0	0	0	0	0	1	Figures: (6) It does not have figures or have figures than not belong to above class Nitrogen Isotherm: No	6	6	TN	TN	TN	TN	TN	TP
10.1021/acs.inorgchem.6b00894	Supporting Information	31	0	0	0	0	0	1	Figures: (6) It does not have figures or have figures than not belong to the above class Nitrogen Isotherm: No	6	6	TN	TN	TN	TN	TN	TP
10.1021/acs.inorgchem.6b00894	Main	1	0	0	0	0	0	1	Figures: (6) It does not have figures or have figures than not belong to above class Nitrogen Isotherm: No	6	6	TN	TN	TN	TN	TN	TP
10.1021/acs.inorgchem.6b00894	Main	2	0	0	0	1	0	0	Figures: (4);(6) Nitrogen Isotherm: No	4	46	TN	TN	TN	TP	TN	FP
10.1021/acs.inorgchem.6b00894	Main	3	0	0	0	0	0	1	Figures: (6) It does not have figures or have figures than not belong to above class Nitrogen Isotherm: No	6	6	TN	TN	TN	TN	TN	TP
10.1021/acs.inorgchem.6b00894	Main	4	0	0	0	0	0	1	Figures: (6) It does not have figures or have figures than not belong to above class Nitrogen Isotherm: No	6	6	TN	TN	TN	TN	TN	TP
10.1021/acs.inorgchem.6b01211	Supporting Information	1	0	0	0	0	0	1	The image provided is only a title page for a scientific document about a porous copper(II) metal-organic framework (MOF) and does not contain any figures, tables, or experimental data. Therefore, based on the information visible in this image, I can provide the following answers according to the template:_x000D_ _x000D_ Figures: [Answer: (6)]_x000D_ Nitrogen Isotherm: No	6	6	TN	TN	TN	TN	TN	TP
10.1021/acs.inorgchem.6b01211	Supporting Information	2	0	0	0	0	0	1	Figures: [Answer: (6) It does not have figures or have figures than not belong to above class]_x000D_ Nitrogen Isotherm: No	6	6	TN	TN	TN	TN	TN	TP
10.1021/acs.inorgchem.6b01211	Supporting Information	3	0	0	0	0	0	1	The provided image does not display a figure but is a text excerpt from a scientific paper discussing methodologies and results pertaining to crystallographic data of a compound. Since there are no figures in the image, the templates provided for responses are not applicable._x000D_ _x000D_ Here is the appropriate response based on the content of the image:_x000D_ _x000D_ Figures: [Answer: (6) It…	6	6	TN	TN	TN	TN	TN	TP
10.1021/acs.inorgchem.6b01211	Supporting Information	4	0	0	0	0	0	1	Figures: (6) It does not have figures or have figures than not belong to above class Nitrogen Isotherm: No	6	6	TN	TN	TN	TN	TN	TP
10.1021/acs.inorgchem.6b01211	Supporting Information	5	0	0	0	0	0	1	Figures: (6) It does not have figures or have figures than not belong to the above class Nitrogen Isotherm: No	6	6	TN	TN	TN	TN	TN	TP
10.1021/acs.inorgchem.6b01211	Supporting Information	6	0	0	0	0	0	1	Figures: (6) It does not have figures or have figures than not belong to above class_x000D_ Nitrogen Isotherm: No	6	6	TN	TN	TN	TN	TN	TP
10.1021/acs.inorgchem.6b01211	Supporting Information	7	0	0	0	0	0	1	Figures: (6) It does not have figures or have figures than not belong to above class_x000D_ Nitrogen Isotherm: No	6	6	TN	TN	TN	TN	TN	TP
10.1021/acs.inorgchem.6b01211	Supporting Information	8	0	0	0	0	0	1	Figures: (6) It does not have figures or have figures than not belong to the above class._x000D_ Nitrogen Isotherm: No.	6	6	TN	TN	TN	TN	TN	TP
10.1021/acs.inorgchem.6b01211	Supporting Information	9	0	0	0	0	0	1	Figures: (6) It does not have figures or have figures than not belong to above class_x000D_ Nitrogen Isotherm: No	6	6	TN	TN	TN	TN	TN	TP
10.1021/acs.inorgchem.6b01211	Supporting Information	10	0	0	0	0	0	1	Figures: (6) It does not have figures or have figures that do not belong to the above class_x000D_ Nitrogen Isotherm: No	6	6	TN	TN	TN	TN	TN	TP
10.1021/acs.inorgchem.6b01211	Supporting Information	11	0	0	0	0	0	1	Figures: (6) It does not have figures or have figures than not belong to above class_x000D_ Nitrogen Isotherm: No	6	6	TN	TN	TN	TN	TN	TP
10.1021/acs.inorgchem.6b01211	Supporting Information	12	0	1	1	0	0	0	Figures: (3);(2)_x000D_ Nitrogen Isotherm: No	23	23	TN	TP	TP	TN	TN	TN
10.1021/acs.inorgchem.6b01211	Supporting Information	13	1	0	0	0	0	0	Figures: (1);(5)_x000D_ Nitrogen Isotherm: Figure S11_x000D_ Compound: Lcu, LcuPRO_x000D_ Porosity: N/A_x000D_ Hysteresis: Yes_x000D_ Saturation: 600 - 650 cm3/g for Lcu; 500 - 550 cm3/g for LcuPRO_x000D_ Position: (0,0.15,1,0.65)	1	15	TP	TN	TN	TN	FP	TN
10.1021/acs.inorgchem.6b01211	Supporting Information	14	0	0	0	0	0	1	The image is a text excerpt, and there are no figures, illustrations, or graphs present within the displayed portion of the document. Therefore, I cannot provide information about nitrogen isotherms or other specific details that would be visible in figures. Here is the template filled out accordingly:_x000D_ _x000D_ Figures: [Answer: (6)]_x000D_ Nitrogen Isotherm: No	6	6	TN	TN	TN	TN	TN	TP
10.1021/acs.inorgchem.6b01211	Supporting Information	15	0	0	0	0	0	1	Figures: (6) It does not have figures or have figures than not belong to above class_x000D_ Nitrogen Isotherm: No	6	6	TN	TN	TN	TN	TN	TP
10.1021/acs.inorgchem.6b01211	Supporting Information	16	0	0	0	0	0	1	Figures: (6) It does not have figures or have figures than not belong to above class_x000D_ Nitrogen Isotherm: No	6	6	TN	TN	TN	TN	TN	TP
10.1021/acs.inorgchem.6b01211	Supporting Information	17	0	1	0	0	0	0	Figures: (2)_x000D_ Nitrogen Isotherm: No	2	2	TN	TP	TN	TN	TN	TN
10.1021/acs.inorgchem.6b01211	Supporting Information	18	0	0	0	0	0	1	Figures: (6) It does not have figures or have figures than not belong to above class_x000D_ Nitrogen Isotherm: No	6	6	TN	TN	TN	TN	TN	TP
10.1021/acs.inorgchem.6b01211	Supporting Information	19	0	0	0	0	0	1	Figures: (6) It does not have figures or have figures than not belong to above class_x000D_ Nitrogen Isotherm: No	6	6	TN	TN	TN	TN	TN	TP
10.1021/acs.inorgchem.6b01211	Supporting Information	20	0	0	0	0	0	1	Figures: (6)_x000D_ Nitrogen Isotherm: No	6	6	TN	TN	TN	TN	TN	TP
10.1021/acs.inorgchem.6b01211	Supporting Information	21	0	0	0	0	0	1	Figures: (6) It does not have figures or have figures than not belong to above class Nitrogen Isotherm: No	6	6	TN	TN	TN	TN	TN	TP
10.1021/acs.inorgchem.6b01211	Supporting Information	22	0	0	0	0	0	1	Figures: (6) It does not have figures or have figures than not belong to the above class Nitrogen Isotherm: No	6	6	TN	TN	TN	TN	TN	TP
10.1021/acs.inorgchem.6b01211	Supporting Information	23	0	0	0	0	0	1	Figures: (6) It does not have figures or have figures than not belong to above class_x000D_ Nitrogen Isotherm: No	6	6	TN	TN	TN	TN	TN	TP
10.1021/acs.inorgchem.6b01211	Supporting Information	24	0	0	0	0	0	1	Figures: (6) It does not have figures or have figures than not belong to above class Nitrogen Isotherm: No	6	6	TN	TN	TN	TN	TN	TP
10.1021/acs.inorgchem.6b01211	Supporting Information	25	0	0	0	0	0	1	Figures: (6) It does not have figures or have figures than not belong to above class Nitrogen Isotherm: No	6	6	TN	TN	TN	TN	TN	TP
10.1021/acs.inorgchem.6b01211	Supporting Information	26	1	0	0	0	0	0	Figures: (1) Nitrogen Isotherm: Figure S36 Compound: LcuPRO Porosity: N/A Hysteresis: Yes Saturation: 6 - 8 cm /g Position: (0.1, 0.4, 0.9, 1)	1	1	TP	TN	TN	TN	TN	TN
10.1021/acs.inorgchem.6b01211	Supporting Information	27	0	0	0	0	0	1	Figures: (6) It does not have figures or have figures than not belong to above class Nitrogen Isotherm: No	6	6	TN	TN	TN	TN	TN	TP
10.1021/acs.inorgchem.6b01211	Supporting Information	28	0	0	0	0	0	1	Figures: [Answer: (6) It does not have figures or have figures than not belong to above class] Nitrogen Isotherm: No	6	6	TN	TN	TN	TN	TN	TP
10.1021/acs.inorgchem.6b01211	Main	1	0	0	0	1	0	0	Figures: (4);(6) Nitrogen Isotherm: No	4	46	TN	TN	TN	TP	TN	FP
10.1021/acs.inorgchem.6b01211	Main	2	0	1	0	1	0	0	Figures: [Answer: (2);(3)]_x000D_ Nitrogen Isotherm: No	24	23	TN	TP	FP	FN	TN	TN
10.1021/acs.inorgchem.6b01211	Main	3	0	0	0	0	0	1	Figures: (6) It does not have figures or have figures than not belong to above class Nitrogen Isotherm: No	6	6	TN	TN	TN	TN	TN	TP
10.1021/acs.inorgchem.6b01416	Supporting Information	1	0	0	0	0	0	1	Figures: [Answer: (6) It does not have figures or have figures than not belong to above class] Nitrogen Isotherm: No	6	6	TN	TN	TN	TN	TN	TP
10.1021/acs.inorgchem.6b01416	Supporting Information	2	0	0	0	0	0	1	Figures: (6) It does not have figures or have figures than not belong to above class Nitrogen Isotherm: No	6	6	TN	TN	TN	TN	TN	TP
10.1021/acs.inorgchem.6b01416	Supporting Information	3	0	0	0	0	0	1	Figures: (6) It does not have figures or have figures than not belong to above class Nitrogen Isotherm: No	6	6	TN	TN	TN	TN	TN	TP
10.1021/acs.inorgchem.6b01416	Supporting Information	4	0	0	0	0	0	1	Figures: (6) It does not have figures or have figures than not belong to above class Nitrogen Isotherm: No	6	6	TN	TN	TN	TN	TN	TP
10.1021/acs.inorgchem.6b01416	Supporting Information	5	0	0	0	0	0	1	Figures: (6) It does not have figures or have figures than not belong to above class Nitrogen Isotherm: No	6	6	TN	TN	TN	TN	TN	TP
10.1021/acs.inorgchem.6b01416	Supporting Information	6	0	0	0	1	0	0	Figures: (4) Nitrogen Isotherm: No	4	4	TN	TN	TN	TP	TN	TN
10.1021/acs.inorgchem.6b01416	Supporting Information	7	0	0	0	1	0	0	Figures: (4);(6) Nitrogen Isotherm: No	4	46	TN	TN	TN	TP	TN	FP
10.1021/acs.inorgchem.6b01416	Supporting Information	8	0	1	1	0	0	0	Figures: (2);(3) Nitrogen Isotherm: No	23	23	TN	TP	TP	TN	TN	TN
10.1021/acs.inorgchem.6b01416	Supporting Information	9	0	0	0	0	0	1	Figures: (5);(6)_x000D_ Nitrogen Isotherm: Figure S7 (a); Figure S7 (b)_x000D_ Compound: 2, 4_x000D_ Porosity: N/A_x000D_ Hysteresis: Yes_x000D_ Saturation: Figure S7 (a): 0.8 - 0.9 cm??/g; Figure S7 (b): 0.8 - 0.9 cm??/g_x000D_ Position: (0, 0.05, 0.55, 0.6)	6	56	TN	TN	TN	TN	FP	FN
10.1021/acs.inorgchem.6b01416	Supporting Information	10	0	0	0	0	1	0	Figures: (5)_x000D_ Nitrogen Isotherm: No_x000D_ Compound: N/A_x000D_ Porosity: N/A_x000D_ Hysteresis: No_x000D_ Saturation: N/A_x000D_ Position: N/A	5	5	TN	TN	TN	TN	TP	TN
10.1021/acs.inorgchem.6b01416	Supporting Information	11	0	0	0	0	1	0	Figures: (5) Nitrogen Isotherm: No	5	5	TN	TN	TN	TN	TP	TN
10.1021/acs.inorgchem.6b01416	Supporting Information	12	0	0	0	0	0	1	Figures: (6) It does not have figures or have figures than not belong to above class Nitrogen Isotherm: No	6	6	TN	TN	TN	TN	TN	TP
10.1021/acs.inorgchem.6b01416	Supporting Information	13	0	0	0	0	0	1	Figures: (6) It does not have figures or have figures than not belong to above class Nitrogen Isotherm: No	6	6	TN	TN	TN	TN	TN	TP
10.1021/acs.inorgchem.6b01416	Main	1	0	0	0	0	0	1	Figures: (6) It does not have figures or have figures than not belong to the above class Nitrogen Isotherm: No	6	6	TN	TN	TN	TN	TN	TP
10.1021/acs.inorgchem.6b01416	Main	2	0	0	0	0	0	1	Figures: (6) It does not have figures or have figures than not belong to above class Nitrogen Isotherm: No	6	6	TN	TN	TN	TN	TN	TP
10.1021/acs.inorgchem.6b01416	Main	3	0	0	0	1	0	0	Figures: (4) Nitrogen Isotherm: No	4	4	TN	TN	TN	TP	TN	TN
10.1021/acs.inorgchem.6b01416	Main	4	0	0	0	1	0	0	Figures: (4) Crystal structure or topology illustration Nitrogen Isotherm: No	4	4	TN	TN	TN	TP	TN	TN
10.1021/acs.inorgchem.6b01416	Main	5	0	0	0	1	0	0	Figures: (4) Nitrogen Isotherm: No	4	4	TN	TN	TN	TP	TN	TN
10.1021/acs.inorgchem.6b01416	Main	6	1	0	0	0	1	0	Figures: (1);(5) Nitrogen Isotherm: Figure 5. N2 and H2 sorption isotherms of 2a (a) and 4a (b) measured at 77 K. Compound: 2-N2, 2a, 4-N2, 4a Porosity: N/A Hysteresis: Yes Saturation: 2-N2: 60 - 80 cm3/g, 2a: 60 - 80 cm3/g, 4-N2: 300 - 350 cm3/g, 4a: 250 - 300 cm3/g Position: (0,0.77,0.55,1)	15	15	TP	TN	TN	TN	TP	TN
10.1021/acs.inorgchem.6b01416	Main	7	0	0	0	0	1	0	Figures: (5) Nitrogen Isotherm: No Compound: N/A Porosity: N/A Hysteresis: N/A Saturation: N/A Position: N/A	5	5	TN	TN	TN	TN	TP	TN
10.1021/acs.inorgchem.6b01416	Main	8	0	0	0	1	0	0	Figures: (4);(5) Nitrogen Isotherm: No	4	45	TN	TN	TN	TP	FP	TN
10.1021/acs.inorgchem.6b01416	Main	9	0	0	0	0	0	1	Figures: (6) It does not have figures or have figures than not belong to above class Nitrogen Isotherm: No	6	6	TN	TN	TN	TN	TN	TP
10.1021/acs.inorgchem.6b01416	Main	10	0	0	0	0	0	1	Figures: (6) It does not have figures or have figures that do not belong to the above class Nitrogen Isotherm: No	6	6	TN	TN	TN	TN	TN	TP
10.1021/acs.inorgchem.6b01569	Supporting Information	1	0	0	0	0	0	1	Figures: (6) It does not have figures or have figures than not belong to above class Nitrogen Isotherm: No	6	6	TN	TN	TN	TN	TN	TP
10.1021/acs.inorgchem.6b01569	Supporting Information	2	0	0	0	0	0	1	Figures: [Answer: (2);(5)]_x000D_ Nitrogen Isotherm: [Answer: Figure S10]_x000D_ Compound: [Answer: 1-3]_x000D_ Porosity: [Answer: N/A]_x000D_ Saturation: [Answer: I do not know]_x000D_ Position: [Answer: (0,0.65,1,0.85)]	6	25	TN	FP	TN	TN	FP	FN
10.1021/acs.inorgchem.6b01569	Supporting Information	3	0	0	0	0	0	1	Figures: (6) It does not have figures or have figures than not belong to above class Nitrogen Isotherm: No	6	6	TN	TN	TN	TN	TN	TP
10.1021/acs.inorgchem.6b01569	Supporting Information	4	0	1	0	0	0	0	Figures: (2);(2) Nitrogen Isotherm: No	2	2	TN	TP	TN	TN	TN	TN
10.1021/acs.inorgchem.6b01569	Supporting Information	5	0	1	0	0	0	0	Figures: (2) Nitrogen Isotherm: No	2	2	TN	TP	TN	TN	TN	TN
10.1021/acs.inorgchem.6b01569	Supporting Information	6	0	0	0	0	0	1	Figures: (6) It does not have figures or have figures than not belong to above class Nitrogen Isotherm: No	6	6	TN	TN	TN	TN	TN	TP
10.1021/acs.inorgchem.6b01569	Supporting Information	7	0	0	0	0	0	1	Figures: (6) It does not have figures or have figures than not belong to above class Nitrogen Isotherm: No	6	6	TN	TN	TN	TN	TN	TP
10.1021/acs.inorgchem.6b01569	Supporting Information	8	0	0	0	0	0	1	Figures: (6) It does not have figures or have figures than not belong to above class Nitrogen Isotherm: No	6	6	TN	TN	TN	TN	TN	TP
10.1021/acs.inorgchem.6b01569	Supporting Information	9	0	0	0	0	0	1	Figures: [Answer: (6) It does not have figures or have figures than not belong to above class] Nitrogen Isotherm: No	6	6	TN	TN	TN	TN	TN	TP
10.1021/acs.inorgchem.6b01569	Supporting Information	10	0	0	0	0	0	1	Figures: (6) It does not have figures or have figures than not belong to above class Nitrogen Isotherm: No	6	6	TN	TN	TN	TN	TN	TP
10.1021/acs.inorgchem.6b01569	Supporting Information	11	0	0	0	0	0	1	Figures: (6) It does not have figures or have figures than not belong to above class Nitrogen Isotherm: No	6	6	TN	TN	TN	TN	TN	TP
10.1021/acs.inorgchem.6b01569	Supporting Information	12	0	0	0	1	0	0	Figures: (4) Nitrogen Isotherm: No	4	4	TN	TN	TN	TP	TN	TN
10.1021/acs.inorgchem.6b01569	Supporting Information	13	0	0	1	0	0	0	Figures: (3) Nitrogen Isotherm: No	3	3	TN	TN	TP	TN	TN	TN
10.1021/acs.inorgchem.6b01569	Supporting Information	14	0	1	0	0	0	0	Figures: (2) Nitrogen Isotherm: No	2	2	TN	TP	TN	TN	TN	TN
10.1021/acs.inorgchem.6b01569	Supporting Information	15	0	1	0	0	0	0	Figures: (2) Nitrogen Isotherm: No	2	2	TN	TP	TN	TN	TN	TN
10.1021/acs.inorgchem.6b01569	Supporting Information	16	0	1	0	0	0	0	Figures: (2) Nitrogen Isotherm: No	2	2	TN	TP	TN	TN	TN	TN
10.1021/acs.inorgchem.6b01569	Supporting Information	17	1	0	0	0	0	0	Figures: (1)_x000D_ Nitrogen Isotherm: Figure S10_x000D_ Compound: Compound 1, Compound 2, Compound 3_x000D_ Porosity: N/A_x000D_ Hysteresis: Yes_x000D_ Saturation: 30 - 40 cm3/g_x000D_ Position: (0, 0.2, 1, 0.65)	1	1	TP	TN	TN	TN	TN	TN
10.1021/acs.inorgchem.6b01569	Supporting Information	18	0	0	0	0	0	1	Figures: (6) It does not have figures or have figures than not belong to above class_x000D_ Nitrogen Isotherm: No	6	6	TN	TN	TN	TN	TN	TP
10.1021/acs.inorgchem.6b01569	Supporting Information	19	0	0	0	0	1	0	Figures: (5)_x000D_ Nitrogen Isotherm: No	5	5	TN	TN	TN	TN	TP	TN
10.1021/acs.inorgchem.6b01569	Supporting Information	20	0	0	0	0	1	0	Figures: (5) Other gas sorption isotherm (e.g. water vapor, CO2, H2, CH4, etc.)_x000D_ Nitrogen Isotherm: No	5	5	TN	TN	TN	TN	TP	TN
10.1021/acs.inorgchem.6b01569	Supporting Information	21	0	0	0	0	0	1	Figures: (5) Other gas sorption isotherm (e.g. water vapor, CO2, H2, CH4, etc.)_x000D_ Nitrogen Isotherm: No	6	5	TN	TN	TN	TN	FP	FN
10.1021/acs.inorgchem.6b01569	Supporting Information	22	0	0	0	0	0	1	Figures: (5);(6)_x000D_ Nitrogen Isotherm: No	6	56	TN	TN	TN	TN	FP	FN
10.1021/acs.inorgchem.6b01569	Supporting Information	23	0	0	0	0	0	1	Figures: (6) It does not have figures or have figures than not belong to above class_x000D_ Nitrogen Isotherm: No	6	6	TN	TN	TN	TN	TN	TP
10.1021/acs.inorgchem.6b01569	Supporting Information	24	0	0	0	0	0	1	Figures: (6) It does not have figures or have figures than not belong to above class_x000D_ Nitrogen Isotherm: No	6	6	TN	TN	TN	TN	TN	TP
10.1021/acs.inorgchem.6b01569	Supporting Information	25	0	0	0	0	0	1	Figures: [Answer: (6)]_x000D_ Nitrogen Isotherm: No	6	6	TN	TN	TN	TN	TN	TP
10.1021/acs.inorgchem.6b01569	Supporting Information	26	0	0	0	0	0	1	Figures: (6) It does not have figures or have figures than not belong to above class_x000D_ Nitrogen Isotherm: No	6	6	TN	TN	TN	TN	TN	TP
10.1021/acs.inorgchem.6b01569	Supporting Information	27	0	0	0	0	0	1	Figures: (6) It does not have figures or have figures than not belong to above class_x000D_ Nitrogen Isotherm: No	6	6	TN	TN	TN	TN	TN	TP
10.1021/acs.inorgchem.6b01569	Supporting Information	28	0	0	0	0	0	1	Figures: (6) It does not have figures or have figures than not belong to above class_x000D_ Nitrogen Isotherm: No	6	6	TN	TN	TN	TN	TN	TP
10.1021/acs.inorgchem.6b01569	Supporting Information	29	0	0	0	0	0	1	Figures: (6) It does not have figures or have figures than not belong to above class_x000D_ Nitrogen Isotherm: No	6	6	TN	TN	TN	TN	TN	TP
10.1021/acs.inorgchem.6b01569	Main	1	0	0	0	0	0	1	Figures: [Answer: (6) It does not have figures or have figures than not belong to above class] Nitrogen Isotherm: No	6	6	TN	TN	TN	TN	TN	TP
10.1021/acs.inorgchem.6b01569	Main	2	0	0	0	0	0	1	Figures: (6) It does not have figures or have figures than not belong to the above class. Nitrogen Isotherm: No	6	6	TN	TN	TN	TN	TN	TP
10.1021/acs.inorgchem.6b01569	Main	3	0	0	0	0	0	1	Figures: (4) Nitrogen Isotherm: No	6	4	TN	TN	TN	FP	TN	FN
10.1021/acs.inorgchem.6b01569	Main	4	0	0	0	1	0	0	Figures: (4) Crystal structure or topology illustration Nitrogen Isotherm: No	4	4	TN	TN	TN	TP	TN	TN
10.1021/acs.inorgchem.6b01569	Main	5	0	0	0	1	1	0	Figures: (4);(5)_x000D_ Nitrogen Isotherm: No	45	45	TN	TN	TN	TP	TP	TN
10.1021/acs.inorgchem.6b01569	Main	6	1	0	0	0	1	0	Figures: (1);(5) Nitrogen Isotherm: Figure 6 (a) Compound: 2, 3 Porosity: N/A Hysteresis: Yes Saturation: 0.05 - 0.15 cm3/g Position: (0.05,0.4,0.55,0.8)	15	15	TP	TN	TN	TN	TP	TN
10.1021/acs.inorgchem.6b01569	Main	7	0	0	0	0	0	1	Figures: (6) It does not have figures or have figures than not belong to above class Nitrogen Isotherm: No	6	6	TN	TN	TN	TN	TN	TP
10.1021/acs.inorgchem.6b01569	Main	8	0	0	0	0	0	1	Figures: (6) It does not have figures or have figures than not belong to above class Nitrogen Isotherm: No	6	6	TN	TN	TN	TN	TN	TP
10.1021/acs.inorgchem.6b01569	Main	9	0	0	0	0	0	1	Figures: (6) It does not have figures or have figures than not belong to above class Nitrogen Isotherm: No	6	6	TN	TN	TN	TN	TN	TP
10.1021/acs.inorgchem.6b01569	Main	10	0	0	0	0	0	1	Figures: [Answer: (6) It does not have figures or have figures than not belong to above class] Nitrogen Isotherm: No	6	6	TN	TN	TN	TN	TN	TP
10.1021/acs.inorgchem.6b01740	Supporting Information	1	0	0	0	0	0	1	Figures: [Answer: (6) It does not have figures or have figures than not belong to above class]_x000D_ Nitrogen Isotherm: No	6	6	TN	TN	TN	TN	TN	TP
10.1021/acs.inorgchem.6b01740	Supporting Information	2	0	0	0	0	0	1	Figures: (6) It does not have figures or have figures than not belong to above class Nitrogen Isotherm: No	6	6	TN	TN	TN	TN	TN	TP
10.1021/acs.inorgchem.6b01740	Supporting Information	3	0	0	0	0	0	1	Figures: (6) It does not have figures or have figures than not belong to above class Nitrogen Isotherm: No	6	6	TN	TN	TN	TN	TN	TP
10.1021/acs.inorgchem.6b01740	Supporting Information	4	0	0	0	0	0	1	Figures: (6) It does not have figures or have figures than not belong to above class Nitrogen Isotherm: No	6	6	TN	TN	TN	TN	TN	TP
10.1021/acs.inorgchem.6b01740	Supporting Information	5	0	0	0	0	0	1	Figures: (6) It does not have figures or have figures than not belong to above class Nitrogen Isotherm: No	6	6	TN	TN	TN	TN	TN	TP
10.1021/acs.inorgchem.6b01740	Supporting Information	6	0	0	0	1	0	0	Figures: (4) Crystal structure or topology illustration Nitrogen Isotherm: No	4	4	TN	TN	TN	TP	TN	TN
10.1021/acs.inorgchem.6b01740	Supporting Information	7	0	0	0	0	0	1	Figures: (6) It does not have figures or have figures than not belong to above class Nitrogen Isotherm: No	6	6	TN	TN	TN	TN	TN	TP
10.1021/acs.inorgchem.6b01740	Supporting Information	8	0	0	0	0	0	1	Figures: (6) It does not have figures or have figures than not belong to above class Nitrogen Isotherm: No	6	6	TN	TN	TN	TN	TN	TP
10.1021/acs.inorgchem.6b01740	Supporting Information	9	0	0	0	0	0	1	Figures: (6) It does not have figures or have figures than not belong to above class Nitrogen Isotherm: No	6	6	TN	TN	TN	TN	TN	TP
10.1021/acs.inorgchem.6b01740	Supporting Information	10	0	0	0	0	0	1	Figures: (6) It does not have figures or have figures than not belong to above class Nitrogen Isotherm: No	6	6	TN	TN	TN	TN	TN	TP
10.1021/acs.inorgchem.6b01740	Supporting Information	11	0	0	0	0	0	1	Figures: (6) It does not have figures or have figures than not belong to above class Nitrogen Isotherm: No	6	6	TN	TN	TN	TN	TN	TP
10.1021/acs.inorgchem.6b01740	Supporting Information	12	0	0	0	0	0	1	Figures: (6) It does not have figures or have figures than not belong to the above class. Nitrogen Isotherm: No	6	6	TN	TN	TN	TN	TN	TP
10.1021/acs.inorgchem.6b01740	Supporting Information	13	0	0	0	0	0	1	Figures: (6) It does not have figures or have figures than not belong to above class Nitrogen Isotherm: No	6	6	TN	TN	TN	TN	TN	TP
10.1021/acs.inorgchem.6b01740	Supporting Information	14	0	0	0	0	0	1	Figures: (6) It does not have figures or have figures than not belong to above class Nitrogen Isotherm: No	6	6	TN	TN	TN	TN	TN	TP
10.1021/acs.inorgchem.6b01740	Supporting Information	15	0	0	0	0	0	1	Figures: (6) It does not have figures or have figures than not belong to above class Nitrogen Isotherm: No	6	6	TN	TN	TN	TN	TN	TP
10.1021/acs.inorgchem.6b01740	Supporting Information	16	0	0	0	1	0	0	Figures: (4) Crystal structure or topology illustration Nitrogen Isotherm: No	4	4	TN	TN	TN	TP	TN	TN
10.1021/acs.inorgchem.6b01740	Supporting Information	17	0	0	0	1	0	0	Figures: (4) Crystal structure or topology illustration Nitrogen Isotherm: No	4	4	TN	TN	TN	TP	TN	TN
10.1021/acs.inorgchem.6b01740	Main	1	0	0	0	0	0	1	Figures: [Answer: (6) It does not have figures or have figures than not belong to above class] Nitrogen Isotherm: No	6	6	TN	TN	TN	TN	TN	TP
10.1021/acs.inorgchem.6b01740	Main	2	0	0	0	1	0	0	Figures: (4) Nitrogen Isotherm: No	4	4	TN	TN	TN	TP	TN	TN
10.1021/acs.inorgchem.6b01740	Main	3	0	0	0	0	0	1	Figures: (6) It does not have figures or have figures than not belong to above class Nitrogen Isotherm: No	6	6	TN	TN	TN	TN	TN	TP
10.1021/acs.inorgchem.6b01740	Main	4	0	0	0	0	0	1	Figures: (4);(5) Nitrogen Isotherm: Figure 4a Compound: CTPV, ("TCNE") Porosity: N/A Hysteresis: Yes Saturation: 12 - 14 cm^3/g Position: (0,0.45,0.5,0.75)	6	45	TN	TN	TN	FP	FP	FN
10.1021/acs.inorgchem.6b01740	Main	5	0	0	0	0	0	1	Figures: (6) It does not have figures or have figures than not belong to above class Nitrogen Isotherm: No	6	6	TN	TN	TN	TN	TN	TP
10.1021/acs.inorgchem.6b01740	Main	6	0	0	0	0	0	1	Figures: (6) It does not have figures or have figures than not belong to above class Nitrogen Isotherm: No	6	6	TN	TN	TN	TN	TN	TP
10.1021/acs.inorgchem.6b02407	Supporting Information	1	0	0	0	0	0	1	Figures: [Answer: (6) It does not have figures or have figures that do not belong to the above class] Nitrogen Isotherm: No	6	6	TN	TN	TN	TN	TN	TP
10.1021/acs.inorgchem.6b02407	Supporting Information	2	0	0	0	0	0	1	Figures: (6) It does not have figures or have figures that not belong to above class. Nitrogen Isotherm: No.	6	6	TN	TN	TN	TN	TN	TP
10.1021/acs.inorgchem.6b02407	Supporting Information	3	0	0	0	0	0	1	Figures: (6) It does not have figures or have figures than not belong to above class_x000D_ Nitrogen Isotherm: No	6	6	TN	TN	TN	TN	TN	TP
10.1021/acs.inorgchem.6b02407	Supporting Information	4	0	0	0	0	0	1	Figures: (6) It does not have figures or have figures than not belong to above class Nitrogen Isotherm: No	6	6	TN	TN	TN	TN	TN	TP
10.1021/acs.inorgchem.6b02407	Supporting Information	5	0	0	0	0	0	1	Figures: (6) It does not have figures or have figures than not belong to above class Nitrogen Isotherm: No	6	6	TN	TN	TN	TN	TN	TP
10.1021/acs.inorgchem.6b02407	Supporting Information	6	0	0	0	0	0	1	Figures: (6) It does not have figures or have figures than not belong to above class Nitrogen Isotherm: No	6	6	TN	TN	TN	TN	TN	TP
10.1021/acs.inorgchem.6b02407	Supporting Information	7	0	0	0	0	0	1	Figures: (6) It does not have figures or have figures than not belong to above class Nitrogen Isotherm: No	6	6	TN	TN	TN	TN	TN	TP
10.1021/acs.inorgchem.6b02407	Supporting Information	8	0	0	0	0	0	1	Figures: [Answer: (6) It does not have figures or have figures that do not belong to the above class] Nitrogen Isotherm: No	6	6	TN	TN	TN	TN	TN	TP
10.1021/acs.inorgchem.6b02407	Supporting Information	9	0	0	0	0	0	1	Figures: (4) Crystal structure or topology illustration Nitrogen Isotherm: No	6	4	TN	TN	TN	FP	TN	FN
10.1021/acs.inorgchem.6b02407	Supporting Information	10	0	0	0	1	0	0	Figures: (4) Nitrogen Isotherm: No	4	4	TN	TN	TN	TP	TN	TN
10.1021/acs.inorgchem.6b02407	Supporting Information	11	0	0	0	0	0	1	Figures: (6)_x000D_ Nitrogen Isotherm: No	6	6	TN	TN	TN	TN	TN	TP
10.1021/acs.inorgchem.6b02407	Supporting Information	12	0	0	0	1	0	0	Figures: (4) Nitrogen Isotherm: No	4	4	TN	TN	TN	TP	TN	TN
10.1021/acs.inorgchem.6b02407	Supporting Information	13	0	1	0	0	0	0	Figures: (2) Nitrogen Isotherm: No	2	2	TN	TP	TN	TN	TN	TN
10.1021/acs.inorgchem.6b02407	Supporting Information	14	0	0	1	0	0	0	Figures: (3) Nitrogen Isotherm: No	3	3	TN	TN	TP	TN	TN	TN
10.1021/acs.inorgchem.6b02407	Supporting Information	15	0	1	0	0	0	0	Figures: (2) Nitrogen Isotherm: No	2	2	TN	TP	TN	TN	TN	TN
10.1021/acs.inorgchem.6b02407	Supporting Information	16	0	0	0	0	1	0	Figures: (5) Nitrogen Isotherm: No	5	5	TN	TN	TN	TN	TP	TN
10.1021/acs.inorgchem.6b02407	Main	1	0	0	0	0	0	1	Figures: (6) It does not have figures or have figures than not belong to above class Nitrogen Isotherm: No	6	6	TN	TN	TN	TN	TN	TP
10.1021/acs.inorgchem.6b02407	Main	2	0	0	0	1	0	0	Figures: (4);(5)_x000D_ Nitrogen Isotherm: No	4	45	TN	TN	TN	TP	FP	TN
10.1021/acs.inorgchem.6b02407	Main	3	1	0	0	0	1	0	Figures: (1);(5)_x000D_ Nitrogen Isotherm: Figure 3a_x000D_ Compound: 2a, 2b_x000D_ Porosity: N/A_x000D_ Hysteresis: Yes_x000D_ Saturation: 350 - 400 cm3/g_x000D_ Position: (0,0.1,0.5,0.5)	15	15	TP	TN	TN	TN	TP	TN
10.1021/acs.inorgchem.6b02407	Main	4	0	0	0	0	0	1	Figures: (6) It does not have figures or have figures than not belong to above class_x000D_ Nitrogen Isotherm: No	6	6	TN	TN	TN	TN	TN	TP
10.1021/acs.inorgchem.6b02413	Supporting Information	1	0	0	0	0	0	1	Figures: (6) It does not have figures or have figures than not belong to above class_x000D_ Nitrogen Isotherm: No	6	6	TN	TN	TN	TN	TN	TP
10.1021/acs.inorgchem.6b02413	Supporting Information	2	0	0	1	0	0	0	Figures: (3)_x000D_ Nitrogen Isotherm: Figure S1_x000D_ Compound: Compound 1, Compound 2_x000D_ Porosity: N/A_x000D_ Hysteresis: I do not know_x000D_ Saturation: I do not know_x000D_ Position: (0,0,1,0.8)	3	3	TN	TN	TP	TN	TN	TN
10.1021/acs.inorgchem.6b02413	Supporting Information	3	0	1	0	0	0	0	Figures: (2);(2)_x000D_ Nitrogen Isotherm: No	2	2	TN	TP	TN	TN	TN	TN
10.1021/acs.inorgchem.6b02413	Supporting Information	4	0	1	0	0	0	0	Figures: (2)_x000D_ Nitrogen Isotherm: No	2	2	TN	TP	TN	TN	TN	TN
10.1021/acs.inorgchem.6b02413	Supporting Information	5	0	0	0	0	0	1	Figures: (6) It does not have figures or have figures than not belong to above class_x000D_ Nitrogen Isotherm: No	6	6	TN	TN	TN	TN	TN	TP
10.1021/acs.inorgchem.6b02413	Supporting Information	6	0	0	0	0	0	1	Figures: (6) It does not have figures or have figures than not belong to above class_x000D_ Nitrogen Isotherm: No	6	6	TN	TN	TN	TN	TN	TP
10.1021/acs.inorgchem.6b02413	Supporting Information	7	0	0	0	0	0	1	Figures: (6) It does not have figures or have figures than not belong to above class_x000D_ Nitrogen Isotherm: No	6	6	TN	TN	TN	TN	TN	TP
10.1021/acs.inorgchem.6b02413	Supporting Information	8	0	1	0	0	0	0	Figures: (2)_x000D_ Nitrogen Isotherm: No	2	2	TN	TP	TN	TN	TN	TN
10.1021/acs.inorgchem.6b02413	Supporting Information	9	0	0	0	0	0	1	Figures: (6) It does not have figures or have figures than not belong to above class_x000D_ Nitrogen Isotherm: No	6	6	TN	TN	TN	TN	TN	TP
10.1021/acs.inorgchem.6b02413	Supporting Information	10	0	0	0	0	0	1	Figures: [Answer: (6) It does not have figures or have figures than not belong to above class] Nitrogen Isotherm: No	6	6	TN	TN	TN	TN	TN	TP
10.1021/acs.inorgchem.6b02413	Supporting Information	11	0	0	0	0	0	1	Figures: (6) It does not have figures or have figures that do not belong to the above class Nitrogen Isotherm: No	6	6	TN	TN	TN	TN	TN	TP
10.1021/acs.inorgchem.6b02413	Supporting Information	12	0	0	0	0	0	1	Figures: (6) It does not have figures or have figures than not belong to above class Nitrogen Isotherm: No	6	6	TN	TN	TN	TN	TN	TP
10.1021/acs.inorgchem.6b02413	Main	1	0	0	0	0	0	1	Figures: (6) It does not have figures or have figures than not belong to above class Nitrogen Isotherm: No	6	6	TN	TN	TN	TN	TN	TP
10.1021/acs.inorgchem.6b02413	Main	2	0	0	0	1	0	0	Figures: (4) Nitrogen Isotherm: No	4	4	TN	TN	TN	TP	TN	TN
10.1021/acs.inorgchem.6b02413	Main	3	0	0	0	0	0	1	Figures: (2)_x000D_ Nitrogen Isotherm: No	6	2	TN	FP	TN	TN	TN	FN
10.1021/acs.inorgchem.6b02413	Main	4	0	0	0	0	0	1	Figures: (6) It does not have figures or have figures than not belong to above class Nitrogen Isotherm: No	6	6	TN	TN	TN	TN	TN	TP
10.1021/acs.inorgchem.6b02413	Main	5	0	0	0	0	0	1	Figures: (6) It does not have figures or have figures than not belong to above class Nitrogen Isotherm: No	6	6	TN	TN	TN	TN	TN	TP
10.1021/acs.inorgchem.6b02413	Main	6	0	0	0	0	0	1	Figures: (6) It does not have figures or have figures than not belong to above class Nitrogen Isotherm: No	6	6	TN	TN	TN	TN	TN	TP
10.1021/acs.inorgchem.6b02413	Main	7	0	0	0	0	0	1	Figures: [Answer: (6) It does not have figures or have figures than not belong to above class] Nitrogen Isotherm: No	6	6	TN	TN	TN	TN	TN	TP
10.1021/acs.inorgchem.6b02514	Supporting Information	1	0	0	0	0	0	1	Figures: (6) It does not have figures or have figures than not belong to above class Nitrogen Isotherm: No	6	6	TN	TN	TN	TN	TN	TP
10.1021/acs.inorgchem.6b02514	Supporting Information	2	0	1	0	0	0	0	Figures: (2);(5) Nitrogen Isotherm: No	2	25	TN	TP	TN	TN	FP	TN
10.1021/acs.inorgchem.6b02514	Supporting Information	3	0	0	1	0	1	0	Figures: (3);(5) Nitrogen Isotherm: No	35	35	TN	TN	TP	TN	TP	TN
10.1021/acs.inorgchem.6b02514	Supporting Information	4	0	0	0	0	0	1	Figures: (6) It does not have figures or have figures than not belong to above class Nitrogen Isotherm: No	6	6	TN	TN	TN	TN	TN	TP
10.1021/acs.inorgchem.6b02514	Supporting Information	5	0	0	0	0	0	1	Figures: [Answer: (6) It does not have figures or have figures than not belong to the above class] Nitrogen Isotherm: No	6	6	TN	TN	TN	TN	TN	TP
10.1021/acs.inorgchem.6b02514	Supporting Information	6	0	0	0	0	0	1	Figures: (6) It does not have figures or have figures than not belong to above class Nitrogen Isotherm: No	6	6	TN	TN	TN	TN	TN	TP
10.1021/acs.inorgchem.6b02514	Supporting Information	7	0	0	0	0	0	1	Figures: (6) It does not have figures or have figures than not belong to above class Nitrogen Isotherm: No	6	6	TN	TN	TN	TN	TN	TP
10.1021/acs.inorgchem.6b02514	Main	1	0	0	0	1	0	0	Figures: (4);(6) Nitrogen Isotherm: No	4	46	TN	TN	TN	TP	TN	FP
10.1021/acs.inorgchem.6b02514	Main	2	0	1	0	1	0	0	Figures: (2);(5) Nitrogen Isotherm: Figure 2(a) Compound: 1 Porosity: N/A Hysteresis: Yes Saturation: 300 - 400 cm3/g Position: (0, 0.75, 0.5, 1)	24	25	TN	TP	TN	FN	FP	TN
10.1021/acs.inorgchem.6b02514	Main	3	0	0	0	0	0	1	Figures: (6) It does not have figures or have figures than not belong to above class Nitrogen Isotherm: No	6	6	TN	TN	TN	TN	TN	TP
10.1021/acs.inorgchem.6b02696	Supporting Information	1	0	0	0	0	0	1	Figures: (6) It does not have figures or have figures than not belong to above class Nitrogen Isotherm: No	6	6	TN	TN	TN	TN	TN	TP
10.1021/acs.inorgchem.6b02696	Supporting Information	2	0	0	0	0	0	1	Figures: (6) It does not have figures or have figures than not belong to above class Nitrogen Isotherm: No	6	6	TN	TN	TN	TN	TN	TP
10.1021/acs.inorgchem.6b02696	Supporting Information	3	0	1	1	0	1	0	Figures: (2);(3);(5) Nitrogen Isotherm: No Compound: N/A Porosity: N/A Hysteresis: N/A Saturation: N/A Position: N/A	235	235	TN	TP	TP	TN	TP	TN
10.1021/acs.inorgchem.6b02696	Supporting Information	4	0	1	0	0	0	0	Figures: (2);(5);(6) Nitrogen Isotherm: No	2	256	TN	TP	TN	TN	FP	FP
10.1021/acs.inorgchem.6b02696	Main	1	0	0	0	1	0	0	Figures: [Answer: (4)]_x000D_ Nitrogen Isotherm: No	4	4	TN	TN	TN	TP	TN	TN
10.1021/acs.inorgchem.6b02696	Main	2	0	0	0	1	0	0	Figures: (4) Nitrogen Isotherm: No	4	4	TN	TN	TN	TP	TN	TN
10.1021/acs.inorgchem.6b02696	Main	3	1	0	0	0	0	0	Figures: (1);(3);(5) Nitrogen Isotherm: Figure 4. N2 sorption isotherms (a) adsorption, (b) desorption Compound: 1 Porosity: N/A Hysteresis: Yes Saturation: 60 - 70 cm^3/g Position: (0, 0.45, 0.5, 0.7)	1	135	TP	TN	FP	TN	FP	TN
10.1021/acs.inorgchem.6b02696	Main	4	0	0	0	0	0	1	Figures: (6) It does not have figures or have figures than not belong to above class Nitrogen Isotherm: No	6	6	TN	TN	TN	TN	TN	TP
10.1021/am301365h	Supporting Information	1	0	0	1	0	0	0	Figures: (3) Nitrogen Isotherm: No Compound: N/A Porosity: N/A Hysteresis: N/A Saturation: N/A Position: N/A	3	3	TN	TN	TP	TN	TN	TN
10.1021/am301365h	Supporting Information	2	0	1	0	0	0	0	Figures: (2) Nitrogen Isotherm: No	2	2	TN	TP	TN	TN	TN	TN
10.1021/am301365h	Supporting Information	3	0	1	0	0	0	0	Figures: (2) Nitrogen Isotherm: No	2	2	TN	TP	TN	TN	TN	TN
10.1021/am301365h	Supporting Information	4	0	1	0	0	0	0	Figures: (2) Nitrogen Isotherm: No	2	2	TN	TP	TN	TN	TN	TN
10.1021/am301365h	Supporting Information	5	0	1	0	0	0	0	Figures: (2) Nitrogen Isotherm: No	2	2	TN	TP	TN	TN	TN	TN
10.1021/am301365h	Supporting Information	6	0	0	0	0	0	1	Figures: (6) It does not have figures or have figures than not belong to above class Nitrogen Isotherm: No	6	6	TN	TN	TN	TN	TN	TP
10.1021/am301365h	Main	1	0	0	0	0	0	1	Figures: (6) It does not have figures or have figures than not belong to above class Nitrogen Isotherm: No	6	6	TN	TN	TN	TN	TN	TP
10.1021/am301365h	Main	2	0	0	0	0	0	1	Figures: (3);(5) Nitrogen Isotherm: Figure 1 Compound: ZIF-8 Porosity: N/A Hysteresis: Yes Saturation: 25 - 30 cm /g Position: (0.6, 0.4, 0.9, 0.7)	6	35	TN	TN	FP	TN	FP	FN
10.1021/am301365h	Main	3	0	1	0	0	0	0	Figures: (2);(3) Nitrogen Isotherm: Figure 3. Caffeine delivery as determined by UV absorption from CAF@ZIF-8 Ex (8 h), CAF@ZIF-8 Ex (3d) and CAF@ZIF-8 IN in water. The inset show total amounts of encapsulated caffeine as obtained by TGA and UV. Compound: CAF@ZIF-8 Ex (8 h), CAF@ZIF-8 Ex (3d), CAF@ZIF-8 IN Porosity: N/A Hysteresis: I do not know Saturation: I do not know Position: (0.55, 0.6, 0.9…	2	23	TN	TP	FP	TN	TN	TN
10.1021/am301365h	Main	4	0	0	0	0	0	1	Figures: (6) It does not have figures or have figures than not belong to above class Nitrogen Isotherm: No	6	6	TN	TN	TN	TN	TN	TP
10.1021/am301365h	Main	5	0	1	0	1	0	0	Figures: (2);(4) Nitrogen Isotherm: No	24	24	TN	TP	TN	TP	TN	TN
10.1021/am301365h	Main	6	0	0	0	0	0	1	Figures: (6) It does not have figures or have figures than not belong to above class Nitrogen Isotherm: No	6	6	TN	TN	TN	TN	TN	TP
10.1021/cg034025w	Main	1	0	0	0	0	0	1	Figures: (6) It does not have figures or have figures than not belong to above class Nitrogen Isotherm: No	6	6	TN	TN	TN	TN	TN	TP
10.1021/cg034025w	Main	2	0	0	0	1	0	0	Figures: (4);(5) Nitrogen Isotherm: No	4	45	TN	TN	TN	TP	FP	TN
10.1021/cg034025w	Main	3	0	0	0	1	0	0	Figures: (4) Crystal structure or topology illustration Nitrogen Isotherm: No	4	4	TN	TN	TN	TP	TN	TN
10.1021/cg034025w	Main	4	0	1	1	0	0	0	Figures: (2);(3);(5) Nitrogen Isotherm: Figure 6 (a);(b);(c) Compound: 1, 2, 3 Porosity: N/A Hysteresis: Yes Saturation: - For compound 1: 20-30 cm^3/g - For compound 2: 250-275 cm^3/g - For compound 3: 10-20 cm^3/g Position: (0.5,0.3,1,0.7)	23	235	TN	TP	TP	TN	FP	TN
10.1021/cg034025w	Main	5	0	0	0	0	0	1	Figures: (6) Nitrogen Isotherm: No	6	6	TN	TN	TN	TN	TN	TP
10.1021/cg034025w	Main	6	0	0	0	0	0	1	Figures: (6) It does not have figures or have figures than not belong to above class Nitrogen Isotherm: No	6	6	TN	TN	TN	TN	TN	TP
10.1021/cg050585e	Supporting Information	1	0	1	0	0	0	0	Figures: (2) Nitrogen Isotherm: No	2	2	TN	TP	TN	TN	TN	TN
10.1021/cg050585e	Supporting Information	2	0	1	1	0	0	0	Figures: (2);(3) Nitrogen Isotherm: No	23	23	TN	TP	TP	TN	TN	TN
10.1021/cg050585e	Supporting Information	3	0	0	1	0	0	0	Figures: (3) Nitrogen Isotherm: Figure S4 Compound: Compound 2 Porosity: N/A Hysteresis: No Saturation: 8-12 mg Position: (0, 0, 1, 1)	3	3	TN	TN	TP	TN	TN	TN
10.1021/cg050585e	Main	1	0	0	0	0	0	1	Figures: (6) It does not have figures or have figures that do not belong to the above class. Nitrogen Isotherm: No	6	6	TN	TN	TN	TN	TN	TP
10.1021/cg050585e	Main	2	0	0	0	1	0	0	Figures: (4) Crystal structure or topology illustration_x000D_ Nitrogen Isotherm: No	4	4	TN	TN	TN	TP	TN	TN
10.1021/cg050585e	Main	3	0	0	0	1	0	0	Figures: (4) Crystal structure or topology illustration_x000D_ Nitrogen Isotherm: No	4	4	TN	TN	TN	TP	TN	TN
10.1021/cg050585e	Main	4	0	0	0	0	0	1	Figures: [Answer: (6) It does not have figures or have figures than not belong to above class]_x000D_ Nitrogen Isotherm: No	6	6	TN	TN	TN	TN	TN	TP
10.1021/cg060732o	Supporting Information	1	0	0	0	1	0	0	Figures: (4)_x000D_ Nitrogen Isotherm: No	4	4	TN	TN	TN	TP	TN	TN
10.1021/cg060732o	Supporting Information	2	0	1	0	0	0	0	Figures: (2)_x000D_ Nitrogen Isotherm: No	2	2	TN	TP	TN	TN	TN	TN
10.1021/cg060732o	Main	1	0	0	0	0	0	1	Figures: (6) It does not have figures or have figures than not belong to above class_x000D_ Nitrogen Isotherm: No	6	6	TN	TN	TN	TN	TN	TP
10.1021/cg060732o	Main	2	0	0	0	1	0	0	Figures: (4)_x000D_ Nitrogen Isotherm: No	4	4	TN	TN	TN	TP	TN	TN
10.1021/cg060732o	Main	3	0	1	1	1	0	0	Figures: (2);(3);(4)_x000D_ Nitrogen Isotherm: No	234	234	TN	TP	TP	TP	TN	TN
10.1021/cg060732o	Main	4	0	0	0	0	0	1	Figures: (6) It does not have figures or have figures than not belong to above class._x000D_ Nitrogen Isotherm: No.	6	6	TN	TN	TN	TN	TN	TP
10.1021/cg100357q	Supporting Information	1	0	0	0	0	0	1	Figures: (6) It does not have figures or have figures than not belong to above class_x000D_ Nitrogen Isotherm: No	6	6	TN	TN	TN	TN	TN	TP
10.1021/cg100357q	Supporting Information	2	0	0	0	0	0	1	Figures: (6) It does not have figures or have figures than not belong to above class_x000D_ Nitrogen Isotherm: No	6	6	TN	TN	TN	TN	TN	TP
10.1021/cg100357q	Supporting Information	3	0	0	0	1	0	0	Figures: [Answer: (4)]_x000D_ Nitrogen Isotherm: No	4	4	TN	TN	TN	TP	TN	TN
10.1021/cg100357q	Main	1	0	0	0	0	0	1	Figures: (6) It does not have figures or have figures than not belong to the above class_x000D_ Nitrogen Isotherm: No	6	6	TN	TN	TN	TN	TN	TP
10.1021/cg100357q	Main	2	0	0	0	1	0	0	Figures: (4) Crystal structure or topology illustration_x000D_ Nitrogen Isotherm: No	4	4	TN	TN	TN	TP	TN	TN
10.1021/cg100357q	Main	3	0	0	0	1	0	0	Figures: (4)_x000D_ Nitrogen Isotherm: No	4	4	TN	TN	TN	TP	TN	TN
10.1021/cg100357q	Main	4	0	0	0	1	0	0	Figures: (4);(6)_x000D_ Nitrogen Isotherm: No	4	46	TN	TN	TN	TP	TN	FP
10.1021/cg100357q	Main	5	1	1	1	0	1	0	Figures: (1);(2);(3);(5)_x000D_ Nitrogen Isotherm: Figure 7_x000D_ Compound: 1a_x000D_ Porosity: Surface area of 1a are 710 m^2 g^???1 and N2 sorption, 0.310 cm^3 g^???1; Langmuir surface area is 820 m^2 g^???1_x000D_ Hysteresis: Yes_x000D_ Saturation: 0.6 - 0.8 cm^3/g STP_x000D_ Position: (0,0.2,0.5,0.5)	1235	1235	TP	TP	TP	TN	TP	TN
10.1021/cg100357q	Main	6	0	0	0	0	0	1	Figures: [Answer: (6) It does not have figures or have figures than not belong to above class]_x000D_ Nitrogen Isotherm: No	6	6	TN	TN	TN	TN	TN	TP
10.1021/cg200332y	Supporting Information	1	0	0	0	0	0	1	Figures: [Answer: (6) It does not have figures or have figures than not belong to above class] Nitrogen Isotherm: No	6	6	TN	TN	TN	TN	TN	TP
10.1021/cg200332y	Supporting Information	2	0	0	0	1	0	0	Figures: (4) Nitrogen Isotherm: No	4	4	TN	TN	TN	TP	TN	TN
10.1021/cg200332y	Supporting Information	3	0	0	0	1	0	0	Figures: (4)_x000D_ Nitrogen Isotherm: No	4	4	TN	TN	TN	TP	TN	TN
10.1021/cg200332y	Supporting Information	4	0	0	0	1	0	0	Figures: (4) Nitrogen Isotherm: No	4	4	TN	TN	TN	TP	TN	TN
10.1021/cg200332y	Supporting Information	5	0	0	1	0	0	0	Figures: (3) Nitrogen Isotherm: No	3	3	TN	TN	TP	TN	TN	TN
10.1021/cg200332y	Supporting Information	6	0	0	0	0	0	1	Figures: (6) It does not have figures or have figures than not belong to above class Nitrogen Isotherm: No	6	6	TN	TN	TN	TN	TN	TP
10.1021/cg200332y	Supporting Information	7	0	0	0	0	0	1	Figures: (6) It does not have figures or have figures than not belong to above class Nitrogen Isotherm: No	6	6	TN	TN	TN	TN	TN	TP
10.1021/cg200332y	Supporting Information	8	0	0	0	0	0	1	Figures: (6) It does not have figures or have figures than not belong to above class Nitrogen Isotherm: No	6	6	TN	TN	TN	TN	TN	TP
10.1021/cg200332y	Main	1	0	0	0	0	0	1	Figures: (6) It does not have figures or have figures than not belong to above class_x000D_ Nitrogen Isotherm: No	6	6	TN	TN	TN	TN	TN	TP
10.1021/cg200332y	Main	2	0	0	0	0	0	1	Figures: [Answer: (6)]_x000D_ Nitrogen Isotherm: No	6	6	TN	TN	TN	TN	TN	TP
10.1021/cg200332y	Main	3	0	0	0	1	0	0	Figures: (4)_x000D_ Nitrogen Isotherm: No_x000D_	4	4	TN	TN	TN	TP	TN	TN
10.1021/cg200332y	Main	4	0	0	0	1	0	0	Figures: (4) Crystal structure or topology illustration_x000D_ Nitrogen Isotherm: No	4	4	TN	TN	TN	TP	TN	TN
10.1021/cg200332y	Main	5	0	0	0	1	0	0	Figures: (4)_x000D_ Nitrogen Isotherm: No	4	4	TN	TN	TN	TP	TN	TN
10.1021/cg200332y	Main	6	0	0	0	1	0	0	Figures: (4)_x000D_ Nitrogen Isotherm: No	4	4	TN	TN	TN	TP	TN	TN
10.1021/cg200332y	Main	7	0	0	0	0	0	1	Figures: (6) It does not have figures or have figures than not belong to the above class_x000D_ Nitrogen Isotherm: No	6	6	TN	TN	TN	TN	TN	TP
10.1021/cg200606r	Supporting Information	1	0	0	0	0	0	1	Figures: (6) It does not have figures or have figures that do not belong to the above class Nitrogen Isotherm: No	6	6	TN	TN	TN	TN	TN	TP
10.1021/cg200606r	Supporting Information	2	0	0	0	0	0	1	Figures: (6) It does not have figures or have figures than not belong to the above class_x000D_ Nitrogen Isotherm: No	6	6	TN	TN	TN	TN	TN	TP
10.1021/cg200606r	Supporting Information	3	0	0	0	0	0	1	Figures: (6) It does not have figures or have figures than not belong to above class Nitrogen Isotherm: No	6	6	TN	TN	TN	TN	TN	TP
10.1021/cg200606r	Supporting Information	4	0	1	0	0	0	0	Figures: (2) Nitrogen Isotherm: No	2	2	TN	TP	TN	TN	TN	TN
10.1021/cg200606r	Supporting Information	5	0	0	0	1	0	0	Figures: (4) Crystal structure or topology illustration Nitrogen Isotherm: No	4	4	TN	TN	TN	TP	TN	TN
10.1021/cg200606r	Supporting Information	6	0	0	1	1	0	0	Figures: (4);(3) Nitrogen Isotherm: No	34	34	TN	TN	TP	TP	TN	TN
10.1021/cg200606r	Supporting Information	7	0	0	0	1	0	0	Figures: (4) Crystal structure or topology illustration Nitrogen Isotherm: No	4	4	TN	TN	TN	TP	TN	TN
10.1021/cg200606r	Supporting Information	8	0	0	0	0	0	1	Figures: (6) It does not have figures or have figures than not belong to above class Nitrogen Isotherm: No	6	6	TN	TN	TN	TN	TN	TP
10.1021/cg200606r	Main	1	0	0	0	1	0	0	Figures: (4)_x000D_ Nitrogen Isotherm: No	4	4	TN	TN	TN	TP	TN	TN
10.1021/cg200606r	Main	2	0	0	0	1	0	0	Figures: (4) Crystal structure or topology illustration_x000D_ Nitrogen Isotherm: No	4	4	TN	TN	TN	TP	TN	TN
10.1021/cg200606r	Main	3	0	0	0	1	0	0	Figures: (4);(5)_x000D_ Nitrogen Isotherm: No	4	45	TN	TN	TN	TP	FP	TN
10.1021/cg200606r	Main	4	0	0	0	0	0	1	Figures: (6) It does not have figures or have figures that do not belong to the above class_x000D_ Nitrogen Isotherm: No	6	6	TN	TN	TN	TN	TN	TP
10.1021/cg2007167	Supporting Information	1	0	0	0	0	0	1	Figures: [Answer: (6)]_x000D_ Nitrogen Isotherm: No	6	6	TN	TN	TN	TN	TN	TP
10.1021/cg2007167	Supporting Information	2	0	1	0	1	0	0	Figures: (2);(4) Nitrogen Isotherm: No	24	24	TN	TP	TN	TP	TN	TN
10.1021/cg2007167	Supporting Information	3	0	0	0	1	0	0	Figures: (4)_x000D_ Nitrogen Isotherm: No	4	4	TN	TN	TN	TP	TN	TN
10.1021/cg2007167	Supporting Information	4	0	0	0	1	0	0	Figures: (4) Crystal structure or topology illustration Nitrogen Isotherm: No	4	4	TN	TN	TN	TP	TN	TN
10.1021/cg2007167	Supporting Information	5	0	0	0	1	0	0	Figures: (4) Nitrogen Isotherm: No	4	4	TN	TN	TN	TP	TN	TN
10.1021/cg2007167	Main	1	0	0	0	1	0	0	Figures: [Answer: (4)]_x000D_ Nitrogen Isotherm: No	4	4	TN	TN	TN	TP	TN	TN
10.1021/cg2007167	Main	2	0	0	0	0	0	1	Figures: (6) It does not have figures or have figures that not belong to the above class_x000D_ Nitrogen Isotherm: No	6	6	TN	TN	TN	TN	TN	TP
10.1021/cg2007167	Main	3	0	0	0	0	0	1	Figures: (6) It does not have figures or have figures that not belong to the above class_x000D_ Nitrogen Isotherm: No	6	6	TN	TN	TN	TN	TN	TP
10.1021/cg2007167	Main	4	0	0	0	1	0	0	Figures: (4) Crystal structure or topology illustration_x000D_ Nitrogen Isotherm: No	4	4	TN	TN	TN	TP	TN	TN
10.1021/cg2007167	Main	5	0	0	0	1	0	0	Figures: (4)_x000D_ Nitrogen Isotherm: No	4	4	TN	TN	TN	TP	TN	TN
10.1021/cg2007167	Main	6	0	0	1	1	0	0	Figures: (3);(4)_x000D_ Nitrogen Isotherm: No	34	34	TN	TN	TP	TP	TN	TN
10.1021/cg2007167	Main	7	0	0	0	0	0	1	Figures: (6) It does not have figures or have figures than not belong to above class_x000D_ Nitrogen Isotherm: No	6	6	TN	TN	TN	TN	TN	TP
10.1021/cg3002866	Supporting Information	1	0	0	0	0	0	1	Figures: (6) It does not have figures or have figures than not belong to above class Nitrogen Isotherm: No	6	6	TN	TN	TN	TN	TN	TP
10.1021/cg3002866	Supporting Information	2	0	0	0	0	0	1	Figures: (6) It does not have figures or have figures than not belong to above class Nitrogen Isotherm: No	6	6	TN	TN	TN	TN	TN	TP
10.1021/cg3002866	Supporting Information	3	0	0	0	0	0	1	Figures: (6) It does not have figures or have figures than not belong to the above class_x000D_ Nitrogen Isotherm: No	6	6	TN	TN	TN	TN	TN	TP
10.1021/cg3002866	Supporting Information	4	0	0	0	0	0	1	Figures: (6) It does not have figures or have figures than not belong to above class Nitrogen Isotherm: No	6	6	TN	TN	TN	TN	TN	TP
10.1021/cg3002866	Supporting Information	5	0	0	0	0	0	1	Figures: (6) It does not have figures or have figures than not belong to above class Nitrogen Isotherm: No	6	6	TN	TN	TN	TN	TN	TP
10.1021/cg3002866	Supporting Information	6	0	0	0	0	0	1	Figures: (4) Crystal structure or topology illustration Nitrogen Isotherm: No	6	4	TN	TN	TN	FP	TN	FN
10.1021/cg3002866	Supporting Information	7	0	0	0	0	0	1	Figures: (6) It does not have figures or have figures than not belong to above class_x000D_ Nitrogen Isotherm: No	6	6	TN	TN	TN	TN	TN	TP
10.1021/cg3002866	Supporting Information	8	0	0	0	0	0	1	Figures: (6) It does not have figures or have figures than not belong to above class_x000D_ Nitrogen Isotherm: No	6	6	TN	TN	TN	TN	TN	TP
10.1021/cg3002866	Supporting Information	9	0	0	0	0	0	1	Figures: (6) It does not have figures or have figures than not belong to above class_x000D_ Nitrogen Isotherm: No	6	6	TN	TN	TN	TN	TN	TP
10.1021/cg3002866	Supporting Information	10	0	0	0	0	0	1	Figures: (6) It does not have figures or have figures than not belong to above class_x000D_ Nitrogen Isotherm: No	6	6	TN	TN	TN	TN	TN	TP
10.1021/cg3002866	Supporting Information	11	0	1	0	0	0	0	Figures: (2) PXRD pattern_x000D_ Nitrogen Isotherm: No	2	2	TN	TP	TN	TN	TN	TN
10.1021/cg3002866	Supporting Information	12	0	0	0	0	0	1	Figures: (5)_x000D_ Nitrogen Isotherm: Fig. S2_x000D_ Compound: SDU-1_x000D_ Porosity: N/A_x000D_ Hysteresis: Yes_x000D_ Saturation: 90-100 cm3/g_x000D_ Position: (0,0,1,1)	6	5	TN	TN	TN	TN	FP	FN
10.1021/cg3002866	Supporting Information	13	0	0	1	0	0	0	Figures: (3)_x000D_ Nitrogen Isotherm: No	3	3	TN	TN	TP	TN	TN	TN
10.1021/cg3002866	Supporting Information	14	0	0	0	1	0	0	Figures: (4)_x000D_ Nitrogen Isotherm: No	4	4	TN	TN	TN	TP	TN	TN
10.1021/cg3002866	Main	1	0	0	0	1	0	0	Figures: [Answer: (4)]_x000D_ Nitrogen Isotherm: No	4	4	TN	TN	TN	TP	TN	TN
10.1021/cg3002866	Main	2	0	0	0	1	0	0	Figures: (4);(6)_x000D_ Nitrogen Isotherm: No	4	46	TN	TN	TN	TP	TN	FP
10.1021/cg3002866	Main	3	0	0	0	0	0	1	Figures: (6) It does not have figures or have figures than not belong to above class_x000D_ Nitrogen Isotherm: No	6	6	TN	TN	TN	TN	TN	TP
10.1021/cg3002866	Main	4	0	0	0	0	0	1	Figures: [Answer: (6) It does not have figures or have figures than not belong to above class]_x000D_ Nitrogen Isotherm: No	6	6	TN	TN	TN	TN	TN	TP
10.1021/cg300302n	Supporting Information	1	0	1	0	0	0	0	Figures: (2) Nitrogen Isotherm: No	2	2	TN	TP	TN	TN	TN	TN
10.1021/cg300302n	Supporting Information	2	0	1	1	0	0	0	Figures: (2);(3) Nitrogen Isotherm: No	23	23	TN	TP	TP	TN	TN	TN
10.1021/cg300302n	Supporting Information	3	0	0	1	0	0	0	Figures: (3);(3) Nitrogen Isotherm: No	3	3	TN	TN	TP	TN	TN	TN
10.1021/cg300302n	Supporting Information	4	0	0	0	0	0	1	Figures: (6) It does not have figures or have figures than not belong to the above class Nitrogen Isotherm: No	6	6	TN	TN	TN	TN	TN	TP
10.1021/cg300302n	Main	1	0	0	0	0	0	1	Figures: (6) It does not have figures or have figures than not belong to above class Nitrogen Isotherm: No	6	6	TN	TN	TN	TN	TN	TP
10.1021/cg300302n	Main	2	0	0	0	0	0	1	Figures: (6) It does not have figures or have figures than not belong to above class Nitrogen Isotherm: No	6	6	TN	TN	TN	TN	TN	TP
10.1021/cg300302n	Main	3	0	0	0	0	0	1	Figures: (6) It does not have figures or have figures than not belong to above class Nitrogen Isotherm: No	6	6	TN	TN	TN	TN	TN	TP
10.1021/cg300302n	Main	4	0	0	0	1	0	0	Figures: (4) Crystal structure or topology illustration Nitrogen Isotherm: No	4	4	TN	TN	TN	TP	TN	TN
10.1021/cg300302n	Main	5	0	0	0	1	0	0	Figures: (4) Crystal structure or topology illustration Nitrogen Isotherm: No	4	4	TN	TN	TN	TP	TN	TN
10.1021/cg300302n	Main	6	0	0	0	1	0	0	Figures: (4) Crystal structure or topology illustration Nitrogen Isotherm: No	4	4	TN	TN	TN	TP	TN	TN
10.1021/cg300302n	Main	7	0	0	0	0	0	1	Figures: (6) It does not have figures or have figures that do not belong to the above class Nitrogen Isotherm: No	6	6	TN	TN	TN	TN	TN	TP
10.1021/cg300302n	Main	8	0	0	0	0	0	1	Figures: (6) It does not have figures or have figures than not belong to above class Nitrogen Isotherm: No	6	6	TN	TN	TN	TN	TN	TP
10.1021/cg300979c	Supporting Information	1	0	0	0	0	0	1	Figures: (6) It does not have figures or have figures than not belong to above class Nitrogen Isotherm: No	6	6	TN	TN	TN	TN	TN	TP
10.1021/cg300979c	Supporting Information	2	0	0	0	0	0	1	Figures: (6) It does not have figures or have figures than not belong to above class Nitrogen Isotherm: No	6	6	TN	TN	TN	TN	TN	TP
10.1021/cg300979c	Supporting Information	3	0	1	1	0	0	0	Figures: (2);(3)_x000D_ Nitrogen Isotherm: No	23	23	TN	TP	TP	TN	TN	TN
10.1021/cg300979c	Main	1	0	0	0	1	0	0	Figures: (4) Crystal structure or topology illustration Nitrogen Isotherm: No	4	4	TN	TN	TN	TP	TN	TN
10.1021/cg300979c	Main	2	0	0	0	1	0	0	Figures: (4) Nitrogen Isotherm: No	4	4	TN	TN	TN	TP	TN	TN
10.1021/cg300979c	Main	3	0	0	0	1	0	0	Figures: (4);(5)_x000D_ Nitrogen Isotherm: Figure 5 (a)_x000D_ Compound: N/A_x000D_ Porosity: N/A_x000D_ Hysteresis: Yes_x000D_ Saturation: 2.2 - 2.5 m^3/g_x000D_ Position: (0,0.6,0.5,1)	4	45	TN	TN	TN	TP	FP	TN
10.1021/cg300979c	Main	4	0	0	0	0	0	1	Figures: [Answer: (6) It does not have figures or have figures than not belong to above class] Nitrogen Isotherm: No	6	6	TN	TN	TN	TN	TN	TP
10.1021/cg3015354	Supporting Information	1	0	0	0	0	0	1	Figures: (6) It does not have figures or have figures than not belong to above class Nitrogen Isotherm: No	6	6	TN	TN	TN	TN	TN	TP
10.1021/cg3015354	Supporting Information	2	0	0	0	0	0	1	Figures: (6) Nitrogen Isotherm: No	6	6	TN	TN	TN	TN	TN	TP
10.1021/cg3015354	Supporting Information	3	0	0	0	0	0	1	Figures: (6) Nitrogen Isotherm: No	6	6	TN	TN	TN	TN	TN	TP
10.1021/cg3015354	Supporting Information	4	0	1	0	0	0	0	Figures: (2);(5) Nitrogen Isotherm: No	2	25	TN	TP	TN	TN	FP	TN
10.1021/cg3015354	Supporting Information	5	0	0	1	1	0	0	Figures: (3);(4) Nitrogen Isotherm: Fig. S3 Compound: N/A Porosity: N/A Hysteresis: I do not know Saturation: -50% - -40% Position: (0,0,1,0.5)	34	34	TN	TN	TP	TP	TN	TN
10.1021/cg3015354	Supporting Information	6	0	0	0	1	0	0	Figures: (4) Nitrogen Isotherm: No	4	4	TN	TN	TN	TP	TN	TN
10.1021/cg3015354	Supporting Information	7	0	0	0	0	0	1	Figures: (3) Nitrogen Isotherm: Fig. S7 Compound: complex 1 Porosity: N/A Hysteresis: Yes Saturation: 0.00 - 0.02 cm^3 g^-1 Position: (0,0.2,1,0.9)	6	3	TN	TN	FP	TN	TN	FN
10.1021/cg3015354	Main	1	0	0	0	1	0	0	Figures: (4) Nitrogen Isotherm: No	4	4	TN	TN	TN	TP	TN	TN
10.1021/cg3015354	Main	2	0	0	0	1	0	0	Figures: (4);(5) Nitrogen Isotherm: Figure 3 Compound: N/A Porosity: N/A Hysteresis: I do not know Saturation: 0.00 - 0.15 cm^3/g Position: (0.5, 0.6, 1, 0.9)	4	45	TN	TN	TN	TP	FP	TN
10.1021/cg3015354	Main	3	0	0	0	0	0	1	Figures: (6) It does not have figures or have figures than not belong to above class Nitrogen Isotherm: No	6	6	TN	TN	TN	TN	TN	TP
10.1021/cg301577a	Supporting Information	1	0	0	0	0	0	1	Figures: [Answer: (6) It does not have figures or have figures than not belong to above class]_x000D_ Nitrogen Isotherm: No	6	6	TN	TN	TN	TN	TN	TP
10.1021/cg301577a	Supporting Information	2	0	0	0	0	0	1	Figures: [Answer: (6) It does not have figures or have figures that not belong to the above class] Nitrogen Isotherm: No	6	6	TN	TN	TN	TN	TN	TP
10.1021/cg301577a	Supporting Information	3	0	0	0	0	0	1	Figures: (6) It does not have figures or have figures than not belong to above class Nitrogen Isotherm: No	6	6	TN	TN	TN	TN	TN	TP
10.1021/cg301577a	Supporting Information	4	0	0	0	0	0	1	Figures: (6) It does not have figures or have figures than not belong to above class Nitrogen Isotherm: No	6	6	TN	TN	TN	TN	TN	TP
10.1021/cg301577a	Supporting Information	5	0	1	0	1	0	0	Figures: (2);(4) Nitrogen Isotherm: No	24	24	TN	TP	TN	TP	TN	TN
10.1021/cg301577a	Supporting Information	6	1	0	0	0	0	0	Figures: (1) Nitrogen Isotherm: Figure S3 Compound: NJU-Bai6 Porosity: N/A Saturation: 300 - 350 cm3/g Position: (0, 0, 1, 0.5)	1	1	TP	TN	TN	TN	TN	TN
10.1021/cg301577a	Supporting Information	7	0	0	0	0	1	0	Figures: (5) Nitrogen Isotherm: No	5	5	TN	TN	TN	TN	TP	TN
10.1021/cg301577a	Supporting Information	8	0	0	0	0	0	1	Figures: (6) It does not have figures or have figures than not belong to above class Nitrogen Isotherm: No	6	6	TN	TN	TN	TN	TN	TP
10.1021/cg301577a	Supporting Information	9	0	0	0	0	0	1	Figures: (6) It does not have figures or have figures than not belong to above class Nitrogen Isotherm: No	6	6	TN	TN	TN	TN	TN	TP
10.1021/cg301577a	Supporting Information	10	0	0	0	0	0	1	Figures: (6) It does not have figures or have figures than not belong to above class Nitrogen Isotherm: No	6	6	TN	TN	TN	TN	TN	TP
10.1021/cg301577a	Supporting Information	11	0	0	0	0	0	1	Figures: (6) It does not have figures or have figures that do not belong to the above class Nitrogen Isotherm: No	6	6	TN	TN	TN	TN	TN	TP
10.1021/cg301577a	Supporting Information	12	0	0	0	0	0	1	Figures: (6) It does not have figures or have figures than not belong to above class Nitrogen Isotherm: No	6	6	TN	TN	TN	TN	TN	TP
10.1021/cg301577a	Main	1	0	0	0	1	0	0	Figures: (4);(5) Nitrogen Isotherm: No	4	45	TN	TN	TN	TP	FP	TN
10.1021/cg301577a	Main	2	1	0	0	1	1	0	Figures: (1);(4);(5) Nitrogen Isotherm: Figure 2 Compound: NJU-Bai6 Porosity: N/A Hysteresis: Yes Saturation: 15 - 20 cm3/g Position: (0.5, 0.3, 1, 0.8)	145	145	TP	TN	TN	TP	TP	TN
10.1021/cg301577a	Main	3	0	0	0	0	0	1	Figures: (6) It does not have figures or have figures than not belong to above class Nitrogen Isotherm: No	6	6	TN	TN	TN	TN	TN	TP
10.1021/cg301725z	Supporting Information	1	0	0	0	0	0	1	The image you've provided appears to be the title page or a section heading of a scientific document that outlines the authors and their affiliations. It is titled "Electronic Supporting Information" for a paper on "Novel Mn(II) based metal-organic frameworks isolated in ionic liquids."_x000D_ _x000D_ Based on the content visible in this image, I can answer the questions as follows:_x000D_ _x000D…	6	6	TN	TN	TN	TN	TN	TP
10.1021/cg301725z	Supporting Information	2	0	1	0	0	0	0	Figures: (2) PXRD pattern_x000D_ Nitrogen Isotherm: No	2	2	TN	TP	TN	TN	TN	TN
10.1021/cg301725z	Supporting Information	3	0	0	1	0	0	0	Figures: (3)_x000D_ Nitrogen Isotherm: No	3	3	TN	TN	TP	TN	TN	TN
10.1021/cg301725z	Supporting Information	4	0	0	0	1	0	0	Figures: (4) Crystal structure or topology illustration Nitrogen Isotherm: No	4	4	TN	TN	TN	TP	TN	TN
10.1021/cg301725z	Supporting Information	5	0	0	0	1	0	0	Figures: (4) Nitrogen Isotherm: No	4	4	TN	TN	TN	TP	TN	TN
10.1021/cg301725z	Supporting Information	6	0	0	0	0	0	1	Figures: (6) It does not have figures or have figures than not belong to above class Nitrogen Isotherm: No	6	6	TN	TN	TN	TN	TN	TP
10.1021/cg301725z	Supporting Information	7	0	0	0	0	0	1	Figures: (6) It does not have figures or have figures than not belong to above class_x000D_ Nitrogen Isotherm: No	6	6	TN	TN	TN	TN	TN	TP
10.1021/cg301725z	Supporting Information	8	0	0	0	0	0	1	Figures: [Answer: (6) It does not have figures or have figures than not belong to the above class]_x000D_ Nitrogen Isotherm: No	6	6	TN	TN	TN	TN	TN	TP
10.1021/cg301725z	Supporting Information	9	0	0	0	0	0	1	Figures: [Answer: (6) It does not have figures or have figures than not belong to above class]_x000D_ Nitrogen Isotherm: No	6	6	TN	TN	TN	TN	TN	TP
10.1021/cg301725z	Supporting Information	10	0	0	0	0	0	1	Figures: (6) It does not have figures or have figures that do not belong to the above class_x000D_ Nitrogen Isotherm: No	6	6	TN	TN	TN	TN	TN	TP
10.1021/cg301725z	Main	1	0	0	0	1	0	0	Figures: (4)_x000D_ Nitrogen Isotherm: No	4	4	TN	TN	TN	TP	TN	TN
10.1021/cg301725z	Main	2	0	0	0	1	0	0	Figures: (4) Nitrogen Isotherm: No	4	4	TN	TN	TN	TP	TN	TN
10.1021/cg301725z	Main	3	0	0	0	0	0	1	Figures: (6) It does not have figures or have figures than not belong to above class_x000D_ Nitrogen Isotherm: No	6	6	TN	TN	TN	TN	TN	TP
10.1021/cg301725z	Main	4	0	0	0	1	0	0	Figures: (4) Crystal structure or topology illustration_x000D_ Nitrogen Isotherm: No	4	4	TN	TN	TN	TP	TN	TN
10.1021/cg301725z	Main	5	0	0	0	1	0	0	Figures: (4);(5)_x000D_ Nitrogen Isotherm: No	4	45	TN	TN	TN	TP	FP	TN
10.1021/cg301725z	Main	6	0	0	0	0	0	1	Figures: (6) It does not have figures or have figures than not belong to above class_x000D_ Nitrogen Isotherm: No	6	6	TN	TN	TN	TN	TN	TP
10.1021/cg301725z	Main	7	0	0	0	0	0	1	Figures: (6) It does not have figures or have figures than not belong to above class_x000D_ Nitrogen Isotherm: No	6	6	TN	TN	TN	TN	TN	TP
10.1021/cg400449c	Supporting Information	1	0	0	0	0	0	1	Figures: (6) It does not have figures or have figures than not belong to above class_x000D_ Nitrogen Isotherm: No	6	6	TN	TN	TN	TN	TN	TP
10.1021/cg400449c	Supporting Information	2	0	0	0	0	0	1	Figures: (6) It does not have figures or have figures than not belong to above class_x000D_ Nitrogen Isotherm: No	6	6	TN	TN	TN	TN	TN	TP
10.1021/cg400449c	Supporting Information	3	0	0	0	0	0	1	Figures: (6) It does not have figures or have figures than not belong to above class_x000D_ Nitrogen Isotherm: No	6	6	TN	TN	TN	TN	TN	TP
10.1021/cg400449c	Supporting Information	4	0	0	0	0	0	1	Figures: (6) It does not have figures or have figures than not belong to above class_x000D_ Nitrogen Isotherm: No	6	6	TN	TN	TN	TN	TN	TP
10.1021/cg400449c	Supporting Information	5	0	0	0	0	0	1	Figures: (6) It does not have figures or have figures than not belong to the above class._x000D_ Nitrogen Isotherm: No	6	6	TN	TN	TN	TN	TN	TP
10.1021/cg400449c	Supporting Information	6	0	0	0	0	0	1	Figures: (6) It does not have figures or have figures than not belong to above class_x000D_ Nitrogen Isotherm: No	6	6	TN	TN	TN	TN	TN	TP
10.1021/cg400449c	Supporting Information	7	0	0	0	0	0	1	Figures: (6) It does not have figures or have figures than not belong to above class_x000D_ Nitrogen Isotherm: No	6	6	TN	TN	TN	TN	TN	TP
10.1021/cg400449c	Supporting Information	8	0	1	0	1	0	0	Figures: (2);(4)_x000D_ Nitrogen Isotherm: No	24	24	TN	TP	TN	TP	TN	TN
10.1021/cg400449c	Supporting Information	9	1	0	0	0	1	0	Figures: (1);(5)_x000D_ Nitrogen Isotherm: Fig. S3_x000D_ Compound: N/A_x000D_ Porosity: N/A_x000D_ Hysteresis: No_x000D_ Saturation: 600 - 800 cm^3/g_x000D_ Position: (0.05, 0.45, 0.95, 0.7)	15	15	TP	TN	TN	TN	TP	TN
10.1021/cg400449c	Supporting Information	10	0	0	0	0	1	0	Figures: (5)_x000D_ Nitrogen Isotherm: No_x000D_ Compound: N/A_x000D_ Porosity: N/A_x000D_ Hysteresis: N/A_x000D_ Saturation: N/A_x000D_ Position: N/A	5	5	TN	TN	TN	TN	TP	TN
10.1021/cg400449c	Supporting Information	11	0	0	0	0	1	0	Figures: (5) Other gas sorption isotherm (e.g. water vapor, CO2, H2, CH4, etc.)_x000D_ Nitrogen Isotherm: No	5	5	TN	TN	TN	TN	TP	TN
10.1021/cg400449c	Supporting Information	12	0	0	0	0	1	0	Figures: (5)_x000D_ Nitrogen Isotherm: No_x000D_ Compound: N/A_x000D_ Porosity: N/A_x000D_ Hysteresis: N/A_x000D_ Saturation: N/A_x000D_ Position: N/A	5	5	TN	TN	TN	TN	TP	TN
10.1021/cg400449c	Supporting Information	13	0	0	1	0	1	0	Figures: (5) Other gas adsorption isotherm (e.g. water vapor, CO2, H2, CH4, etc.)_x000D_ Nitrogen Isotherm: No	35	5	TN	TN	FN	TN	TP	TN
10.1021/cg400449c	Supporting Information	14	0	0	0	0	0	1	Figures: (3);(6)_x000D_ Nitrogen Isotherm: No	6	36	TN	TN	FP	TN	TN	FN
10.1021/cg400449c	Supporting Information	15	0	0	0	0	0	1	Figures: (6) It does not have figures or have figures than not belong to the above class._x000D_ Nitrogen Isotherm: No	6	6	TN	TN	TN	TN	TN	TP
10.1021/cg400449c	Main	1	0	0	0	1	1	0	Figures: (4);(5)_x000D_ Nitrogen Isotherm: No	45	45	TN	TN	TN	TP	TP	TN
10.1021/cg400449c	Main	2	0	0	0	1	0	0	Figures: (4)_x000D_ Nitrogen Isotherm: No	4	4	TN	TN	TN	TP	TN	TN
10.1021/cg400449c	Main	3	0	0	0	0	1	0	Figures: [Answer: (5)]_x000D_ Nitrogen Isotherm: No	5	5	TN	TN	TN	TN	TP	TN
10.1021/cg400449c	Main	4	0	0	0	0	0	1	Figures: (6) It does not have figures or have figures than not belong to above class_x000D_ Nitrogen Isotherm: No	6	6	TN	TN	TN	TN	TN	TP
10.1021/cg4012185	Supporting Information	1	0	0	0	0	0	1	Figures: [Answer: (6) It does not have figures or have figures than not belong to above class]_x000D_ Nitrogen Isotherm: No	6	6	TN	TN	TN	TN	TN	TP
10.1021/cg4012185	Supporting Information	2	0	0	0	0	0	1	Figures: [Answer: (6) It does not have figures or have figures than not belong to above class]_x000D_ Nitrogen Isotherm: No	6	6	TN	TN	TN	TN	TN	TP
10.1021/cg4012185	Supporting Information	3	0	0	0	0	0	1	Figures: (6) It does not have figures or have figures than not belong to above class_x000D_ Nitrogen Isotherm: No	6	6	TN	TN	TN	TN	TN	TP
10.1021/cg4012185	Supporting Information	4	0	1	0	0	0	0	Figures: (2) PXRD pattern_x000D_ Nitrogen Isotherm: No	2	2	TN	TP	TN	TN	TN	TN
10.1021/cg4012185	Supporting Information	5	0	1	0	0	0	0	Figures: (2)_x000D_ Nitrogen Isotherm: No	2	2	TN	TP	TN	TN	TN	TN
10.1021/cg4012185	Supporting Information	6	0	0	1	0	0	0	Figures: (3)_x000D_ Nitrogen Isotherm: Figure S3_x000D_ Compound: 1, 2_x000D_ Porosity: N/A_x000D_ Hysteresis: I do not know_x000D_ Saturation: I do not know_x000D_ Position: (0,0,1,1)	3	3	TN	TN	TP	TN	TN	TN
10.1021/cg4012185	Supporting Information	7	0	0	0	0	0	1	Figures: [Answer: (6) It does not have figures or have figures that do not belong to the above class]_x000D_ Nitrogen Isotherm: No	6	6	TN	TN	TN	TN	TN	TP
10.1021/cg4012185	Supporting Information	8	0	0	0	0	0	1	Figures: (6) It does not have figures or have figures than not belong to above class_x000D_ Nitrogen Isotherm: No	6	6	TN	TN	TN	TN	TN	TP
10.1021/cg4012185	Supporting Information	9	0	0	0	0	0	1	Figures: (6) It does not have figures or have figures than not belong to above class_x000D_ Nitrogen Isotherm: No	6	6	TN	TN	TN	TN	TN	TP
10.1021/cg4012185	Supporting Information	10	0	0	0	0	0	1	Figures: (6) It does not have figures or have figures than not belong to the above class_x000D_ Nitrogen Isotherm: No	6	6	TN	TN	TN	TN	TN	TP
10.1021/cg4012185	Supporting Information	11	0	0	0	0	0	1	Figures: (6) It does not have figures or have figures than not belong to above class_x000D_ Nitrogen Isotherm: No	6	6	TN	TN	TN	TN	TN	TP
10.1021/cg4012185	Supporting Information	12	0	0	0	0	0	1	Figures: (6) It does not have figures or have figures than not belong to the above class_x000D_ Nitrogen Isotherm: No	6	6	TN	TN	TN	TN	TN	TP
10.1021/cg4012185	Supporting Information	13	0	0	0	0	0	1	Figures: (6) It does not have figures or have figures than not belong to above class_x000D_ Nitrogen Isotherm: No	6	6	TN	TN	TN	TN	TN	TP
10.1021/cg4012185	Supporting Information	14	0	0	0	0	0	1	Figures: (6) It does not have figures or have figures than not belong to above class_x000D_ Nitrogen Isotherm: No	6	6	TN	TN	TN	TN	TN	TP
10.1021/cg4012185	Supporting Information	15	0	0	0	0	0	1	Figures: (6) It does not have figures or have figures that do not belong to the above class_x000D_ Nitrogen Isotherm: No	6	6	TN	TN	TN	TN	TN	TP
10.1021/cg4012185	Supporting Information	16	0	0	0	0	0	1	Figures: (6) It does not have figures or have figures than not belong to the above class_x000D_ Nitrogen Isotherm: No	6	6	TN	TN	TN	TN	TN	TP
10.1021/cg4012185	Supporting Information	17	0	0	0	0	0	1	Figures: (6) It does not have figures or have figures than not belong to above class_x000D_ Nitrogen Isotherm: No	6	6	TN	TN	TN	TN	TN	TP
10.1021/cg4012185	Supporting Information	18	0	0	0	0	0	1	Figures: (6) It does not have figures or have figures than not belong to above class_x000D_ Nitrogen Isotherm: No	6	6	TN	TN	TN	TN	TN	TP
10.1021/cg4012185	Supporting Information	19	0	0	0	0	0	1	Figures: (6) It does not have figures or have figures that not belong to the above class_x000D_ Nitrogen Isotherm: No	6	6	TN	TN	TN	TN	TN	TP
10.1021/cg4012185	Supporting Information	20	0	0	0	0	0	1	Figures: [Answer: (6) It does not have figures or have figures than not belong to above class]_x000D_ Nitrogen Isotherm: No	6	6	TN	TN	TN	TN	TN	TP
10.1021/cg4012185	Supporting Information	21	0	0	0	0	0	1	Figures: (6) It does not have figures or have figures than not belong to above class_x000D_ Nitrogen Isotherm: No	6	6	TN	TN	TN	TN	TN	TP
10.1021/cg4012185	Supporting Information	22	0	0	0	0	0	1	Figures: (6) It does not have figures or have figures than not belong to above class_x000D_ Nitrogen Isotherm: No	6	6	TN	TN	TN	TN	TN	TP
10.1021/cg4012185	Supporting Information	23	0	0	0	0	0	1	Figures: (6) It does not have figures or have figures than not belong to above class_x000D_ Nitrogen Isotherm: No	6	6	TN	TN	TN	TN	TN	TP
10.1021/cg4012185	Supporting Information	24	0	0	0	0	0	1	Figures: (6) It does not have figures or have figures that do not belong to the above class_x000D_ Nitrogen Isotherm: No	6	6	TN	TN	TN	TN	TN	TP
10.1021/cg4012185	Supporting Information	25	0	0	0	0	0	1	Figures: (6) It does not have figures or have figures than not belong to above class_x000D_ Nitrogen Isotherm: No	6	6	TN	TN	TN	TN	TN	TP
10.1021/cg4012185	Supporting Information	26	0	0	0	1	0	0	Figures: (4)_x000D_ Nitrogen Isotherm: No	4	4	TN	TN	TN	TP	TN	TN
10.1021/cg4012185	Supporting Information	27	0	0	0	0	0	1	Figures: (6) It does not have figures or have figures than not belong to above class_x000D_ Nitrogen Isotherm: No	6	6	TN	TN	TN	TN	TN	TP
10.1021/cg4012185	Supporting Information	28	0	0	0	0	0	1	Figures: (6) It does not have figures or have figures than not belong to above class_x000D_ Nitrogen Isotherm: No	6	6	TN	TN	TN	TN	TN	TP
10.1021/cg4012185	Supporting Information	29	0	0	0	0	0	1	Figures: (6) It does not have figures or have figures that not belong to the above class._x000D_ Nitrogen Isotherm: No	6	6	TN	TN	TN	TN	TN	TP
10.1021/cg4012185	Supporting Information	30	0	0	0	0	0	1	Figures: (6) It does not have figures or have figures than not belong to the above class_x000D_ Nitrogen Isotherm: No	6	6	TN	TN	TN	TN	TN	TP
10.1021/cg4012185	Supporting Information	31	0	0	0	0	0	1	Figures: [Answer: (6) It does not have figures or have figures than not belong to above class]_x000D_ Nitrogen Isotherm: No	6	6	TN	TN	TN	TN	TN	TP
10.1021/cg4012185	Supporting Information	32	0	0	0	0	0	1	Figures: [Answer: (6) It does not have figures or have figures than not belong to above class]_x000D_ Nitrogen Isotherm: No	6	6	TN	TN	TN	TN	TN	TP
10.1021/cg4012185	Main	1	0	0	0	0	0	1	Figures: (6) It does not have figures or have figures than not belong to above class_x000D_ Nitrogen Isotherm: No	6	6	TN	TN	TN	TN	TN	TP
10.1021/cg4012185	Main	2	0	0	0	1	0	0	Figures: (4) Crystal structure or topology illustration_x000D_ Nitrogen Isotherm: No	4	4	TN	TN	TN	TP	TN	TN
10.1021/cg4012185	Main	3	0	0	0	0	0	1	Figures: (6) It does not have figures or have figures that not belong to the above class_x000D_ Nitrogen Isotherm: No	6	6	TN	TN	TN	TN	TN	TP
10.1021/cg4012185	Main	4	0	0	0	0	0	1	Figures: [Answer: (6) It does not have figures or have figures that do not belong to the above class]_x000D_ Nitrogen Isotherm: No	6	6	TN	TN	TN	TN	TN	TP
10.1021/cg401858s	Supporting Information	1	0	0	0	0	0	1	Figures: (6) It does not have figures or have figures than not belong to above class_x000D_ Nitrogen Isotherm: No	6	6	TN	TN	TN	TN	TN	TP
10.1021/cg401858s	Supporting Information	2	0	0	0	0	0	1	The image you've provided appears to be a text excerpt from a scientific paper, which includes a description of experimental procedures and data collection methods. There are no figures visible in the image, such as nitrogen isotherm, PXRD pattern, TGA curve, crystal structure, topology illustration, or other gas sorption isotherms. Therefore, the template to be used for this response is as follo…	6	6	TN	TN	TN	TN	TN	TP
10.1021/cg401858s	Supporting Information	3	0	0	0	0	0	1	Figures: (6) It does not have figures or have figures than not belong to above class_x000D_ Nitrogen Isotherm: No	6	6	TN	TN	TN	TN	TN	TP
10.1021/cg401858s	Supporting Information	4	0	0	0	0	0	1	Figures: (6) It does not have figures or have figures than not belong to above class_x000D_ Nitrogen Isotherm: No	6	6	TN	TN	TN	TN	TN	TP
10.1021/cg401858s	Supporting Information	5	0	0	1	0	0	0	Figures: (3)_x000D_ Nitrogen Isotherm: No	3	3	TN	TN	TP	TN	TN	TN
10.1021/cg401858s	Supporting Information	6	0	0	1	0	0	0	Figures: (3)_x000D_ Nitrogen Isotherm: No	3	3	TN	TN	TP	TN	TN	TN
10.1021/cg401858s	Supporting Information	7	0	1	0	0	0	0	Figures: (2)_x000D_ Nitrogen Isotherm: No	2	2	TN	TP	TN	TN	TN	TN
10.1021/cg401858s	Supporting Information	8	0	1	0	0	0	0	Figures: (2)_x000D_ Nitrogen Isotherm: No	2	2	TN	TP	TN	TN	TN	TN
10.1021/cg401858s	Main	1	0	0	0	1	0	0	Figures: (4);(6)_x000D_ Nitrogen Isotherm: No	4	46	TN	TN	TN	TP	TN	FP
10.1021/cg401858s	Main	2	0	0	0	1	0	0	Figures: (4) Crystal structure or topology illustration_x000D_ Nitrogen Isotherm: No	4	4	TN	TN	TN	TP	TN	TN
10.1021/cg401858s	Main	3	0	0	0	1	0	0	Figures: (4);(5)_x000D_ Nitrogen Isotherm: No	4	45	TN	TN	TN	TP	FP	TN
10.1021/cg401858s	Main	4	0	0	0	0	0	1	Figures: [Answer: (6)]_x000D_ Nitrogen Isotherm: No	6	6	TN	TN	TN	TN	TN	TP
10.1021/cg401887b	Supporting Information	1	0	0	0	0	0	1	Figures: (6) It does not have figures or have figures than not belong to above class_x000D_ Nitrogen Isotherm: No	6	6	TN	TN	TN	TN	TN	TP
10.1021/cg401887b	Supporting Information	2	0	0	0	0	0	1	Figures: (6) It does not have figures or have figures than not belong to above class_x000D_ Nitrogen Isotherm: No	6	6	TN	TN	TN	TN	TN	TP
10.1021/cg401887b	Supporting Information	3	0	0	0	0	0	1	Figures: (6) It does not have figures or have figures than not belong to above class_x000D_ Nitrogen Isotherm: No	6	6	TN	TN	TN	TN	TN	TP
10.1021/cg401887b	Supporting Information	4	0	1	0	1	0	0	Figures: (2);(4)_x000D_ Nitrogen Isotherm: No	24	24	TN	TP	TN	TP	TN	TN
10.1021/cg401887b	Supporting Information	5	0	0	1	0	0	0	Figures: (3)_x000D_ Nitrogen Isotherm: Fig S3; Fig S4_x000D_ Compound: JUC-118; JUC-118-1_x000D_ Porosity: N/A_x000D_ Hysteresis: No_x000D_ Saturation: Fig S3: 60 - 80; Fig S4: 60 - 80_x000D_ Position: (0, 0, 1, 0.5) for Fig S3; (0, 0.5, 1, 1) for Fig S4.	3	3	TN	TN	TP	TN	TN	TN
10.1021/cg401887b	Supporting Information	6	0	0	0	0	0	1	Figures: (6) It does not have figures or have figures than not belong to above class_x000D_ Nitrogen Isotherm: No	6	6	TN	TN	TN	TN	TN	TP
10.1021/cg401887b	Supporting Information	7	0	0	0	0	0	1	Figures: (6) It does not have figures or have figures than not belong to above class_x000D_ Nitrogen Isotherm: No	6	6	TN	TN	TN	TN	TN	TP
10.1021/cg401887b	Supporting Information	8	0	0	0	0	0	1	Figures: (6) It does not have figures or have figures than not belong to above class_x000D_ Nitrogen Isotherm: No	6	6	TN	TN	TN	TN	TN	TP
10.1021/cg401887b	Supporting Information	9	0	0	0	0	0	1	Figures: (6) It does not have figures or have figures than not belong to above class_x000D_ Nitrogen Isotherm: No	6	6	TN	TN	TN	TN	TN	TP
10.1021/cg401887b	Supporting Information	10	0	0	0	0	0	1	Figures: (6) It does not have figures or have figures than not belong to above class_x000D_ Nitrogen Isotherm: No	6	6	TN	TN	TN	TN	TN	TP
10.1021/cg401887b	Main	1	0	0	0	1	0	0	Figures: (4);(6)_x000D_ Nitrogen Isotherm: No	4	46	TN	TN	TN	TP	TN	FP
10.1021/cg401887b	Main	2	0	0	0	1	0	0	Figures: (4)_x000D_ Nitrogen Isotherm: No	4	4	TN	TN	TN	TP	TN	TN
10.1021/cg401887b	Main	3	0	1	0	1	0	0	Figures: (2);(4)_x000D_ Nitrogen Isotherm: No	24	24	TN	TP	TN	TP	TN	TN
10.1021/cg401887b	Main	4	0	0	0	1	0	0	Figures: (4);(5)_x000D_ Nitrogen Isotherm: No	4	45	TN	TN	TN	TP	FP	TN
10.1021/cg401887b	Main	5	0	0	0	0	0	1	Figures: (6) It does not have figures or have figures than not belong to above class_x000D_ Nitrogen Isotherm: No	6	6	TN	TN	TN	TN	TN	TP
10.1021/cg401887b	Main	6	0	0	0	0	0	1	Figures: [Answer: (6) It does not have figures or have figures than not belong to above class]_x000D_ Nitrogen Isotherm: No	6	6	TN	TN	TN	TN	TN	TP
10.1021/cg500033b	Supporting Information	1	0	0	0	0	0	1	Figures: [Answer: (6) It does not have figures or have figures than not belong to above class]_x000D_ Nitrogen Isotherm: No	6	6	TN	TN	TN	TN	TN	TP
10.1021/cg500033b	Supporting Information	2	0	0	0	0	0	1	Figures: (6) It does not have figures or have figures than not belong to above class_x000D_ Nitrogen Isotherm: No	6	6	TN	TN	TN	TN	TN	TP
10.1021/cg500033b	Supporting Information	3	0	0	0	0	0	1	Figures: (6) It does not have figures or have figures than not belong to the above class_x000D_ Nitrogen Isotherm: No	6	6	TN	TN	TN	TN	TN	TP
10.1021/cg500033b	Supporting Information	4	0	0	0	0	0	1	Figures: (6) It does not have figures or have figures that not belong to the above class_x000D_ Nitrogen Isotherm: No	6	6	TN	TN	TN	TN	TN	TP
10.1021/cg500033b	Supporting Information	5	0	0	0	0	0	1	Figures: (6) It does not have figures or have figures than not belong to above class_x000D_ Nitrogen Isotherm: No	6	6	TN	TN	TN	TN	TN	TP
10.1021/cg500033b	Supporting Information	6	0	0	0	0	0	1	Figures: (6) It does not have figures or have figures than not belong to the above class._x000D_ Nitrogen Isotherm: No	6	6	TN	TN	TN	TN	TN	TP
10.1021/cg500033b	Supporting Information	7	0	0	0	0	0	1	Figures: (6) It does not have figures or have figures than not belong to above class_x000D_ Nitrogen Isotherm: No	6	6	TN	TN	TN	TN	TN	TP
10.1021/cg500033b	Supporting Information	8	0	0	0	1	0	0	Figures: (4) Crystal structure or topology illustration_x000D_ Nitrogen Isotherm: No	4	4	TN	TN	TN	TP	TN	TN
10.1021/cg500033b	Supporting Information	9	0	0	0	1	0	0	Figures: (4) Crystal structure or topology illustration_x000D_ Nitrogen Isotherm: No	4	4	TN	TN	TN	TP	TN	TN
10.1021/cg500033b	Supporting Information	10	0	1	0	0	0	0	Figures: (2)_x000D_ Nitrogen Isotherm: No	2	2	TN	TP	TN	TN	TN	TN
10.1021/cg500033b	Supporting Information	11	0	1	0	0	0	0	Figures: (2)_x000D_ Nitrogen Isotherm: No	2	2	TN	TP	TN	TN	TN	TN
10.1021/cg500033b	Supporting Information	12	0	0	1	0	0	0	Figures: (3)_x000D_ Nitrogen Isotherm: No	3	3	TN	TN	TP	TN	TN	TN
10.1021/cg500033b	Supporting Information	13	0	0	0	0	1	0	Figures: (5)_x000D_ Nitrogen Isotherm: Figure S7_x000D_ Compound: TMU-4, TMU-5_x000D_ Porosity: BET-CO2 at 195 K (m^3/g) for TMU-4 (mech) is 517.9, TMU-4 (heat) is 497.3, TMU-5 (mech) is 502.7, and TMU-5 (heat) is 511.1. BET-N2 at 77 K (m^3/g) for TMU-4 (mech) is 8.4 and for TMU-5 (mech) is 400.8. Qst: zero coverage (kJ/mol) for TMU-4 is 25.6-27.8 and for TMU-5 is 43.4._x000D_ Hysteresis: I do no…	5	5	TN	TN	TN	TN	TP	TN
10.1021/cg500033b	Supporting Information	14	0	1	0	0	0	0	Figures: (2)_x000D_ Nitrogen Isotherm: No	2	2	TN	TP	TN	TN	TN	TN
10.1021/cg500033b	Supporting Information	15	1	0	0	0	1	0	Figures: (1);(5)_x000D_ Nitrogen Isotherm: Figure S9_x000D_ Compound: TMU-4, TMU-5_x000D_ Porosity: N/A_x000D_ Hysteresis: I do not know_x000D_ Saturation: 1.2 - 1.4 cm??/g_x000D_ Position: (0,0.1,0.65,0.5)	15	15	TP	TN	TN	TN	TP	TN
10.1021/cg500033b	Supporting Information	16	0	0	0	0	0	1	Figures: (6) It does not have figures or have figures than not belong to above class_x000D_ Nitrogen Isotherm: No	6	6	TN	TN	TN	TN	TN	TP
10.1021/cg500033b	Main	1	0	0	0	0	0	1	Figures: (6) It does not have figures or have figures than not belong to above class_x000D_ Nitrogen Isotherm: No	6	6	TN	TN	TN	TN	TN	TP
10.1021/cg500033b	Main	2	0	0	0	1	0	0	Figures: (4)_x000D_ Nitrogen Isotherm: No	4	4	TN	TN	TN	TP	TN	TN
10.1021/cg500033b	Main	3	0	0	0	0	1	0	Figures: (5)_x000D_ Nitrogen Isotherm: No	5	5	TN	TN	TN	TN	TP	TN
10.1021/cg500033b	Main	4	0	0	0	0	0	1	Figures: (6) It does not have figures or have figures than not belong to the above class_x000D_ Nitrogen Isotherm: No	6	6	TN	TN	TN	TN	TN	TP
10.1021/cg500033b	Main	5	0	0	0	0	0	1	Figures: (6) It does not have figures or have figures than not belong to above class_x000D_ Nitrogen Isotherm: No	6	6	TN	TN	TN	TN	TN	TP
10.1021/cg500091k	Supporting Information	1	0	0	0	0	0	1	Figures: [Answer: (6) It does not have figures or have figures than not belong to above class]_x000D_ Nitrogen Isotherm: No	6	6	TN	TN	TN	TN	TN	TP
10.1021/cg500091k	Supporting Information	2	0	0	0	1	0	0	Figures: (4) Crystal structure or topology illustration_x000D_ Nitrogen Isotherm: No	4	4	TN	TN	TN	TP	TN	TN
10.1021/cg500091k	Supporting Information	3	0	0	0	1	0	0	Figures: (4) Crystal structure or topology illustration_x000D_ Nitrogen Isotherm: No	4	4	TN	TN	TN	TP	TN	TN
10.1021/cg500091k	Supporting Information	4	0	1	0	0	0	0	Figures: (2)_x000D_ Nitrogen Isotherm: No	2	2	TN	TP	TN	TN	TN	TN
10.1021/cg500091k	Supporting Information	5	0	0	1	0	0	0	Figures: (3)_x000D_ Nitrogen Isotherm: No	3	3	TN	TN	TP	TN	TN	TN
10.1021/cg500091k	Supporting Information	6	0	0	1	0	0	0	Figures: (3);(5)_x000D_ Nitrogen Isotherm: No	3	35	TN	TN	TP	TN	FP	TN
10.1021/cg500091k	Supporting Information	7	0	0	0	1	0	0	Figures: (4);(5)_x000D_ Nitrogen Isotherm: No	4	45	TN	TN	TN	TP	FP	TN
10.1021/cg500091k	Supporting Information	8	0	0	0	0	1	0	Figures: (5)_x000D_ Nitrogen Isotherm: Figure S8, panels b and c_x000D_ Compound: JLU-Liu3, JLU-Liu4_x000D_ Porosity: N/A_x000D_ Hysteresis: I do not know_x000D_ Saturation: b: 0.0 - 0.08 cm??/g, c: 0.0 - 0.02 cm??/g_x000D_ Position: (0, 0, 0.5, 0.7)	5	5	TN	TN	TN	TN	TP	TN
10.1021/cg500091k	Supporting Information	9	0	0	0	0	0	1	Figures: (6)_x000D_ Nitrogen Isotherm: No	6	6	TN	TN	TN	TN	TN	TP
10.1021/cg500091k	Supporting Information	10	0	0	0	0	0	1	Figures: (6) It does not have figures or have figures than not belong to above class_x000D_ Nitrogen Isotherm: No	6	6	TN	TN	TN	TN	TN	TP
10.1021/cg500091k	Main	1	1	0	0	1	1	0	Figures: (1);(4);(5)_x000D_ Nitrogen Isotherm: Figure on the top right_x000D_ Compound: JLU-Liu3, JLU-Liu4_x000D_ Porosity: N/A_x000D_ Hysteresis: Yes_x000D_ Saturation: 300 - 400 cm^3/g_x000D_ Position: (0.5, 0, 1, 0.4)	145	145	TP	TN	TN	TP	TP	TN
10.1021/cg500091k	Main	2	0	0	0	0	0	1	Figures: (4);(5)_x000D_ Nitrogen Isotherm: No	6	45	TN	TN	TN	FP	FP	FN
10.1021/cg500091k	Main	3	0	0	0	1	0	0	Figures: (4) Crystal structure or topology illustration_x000D_ Nitrogen Isotherm: No	4	4	TN	TN	TN	TP	TN	TN
10.1021/cg500091k	Main	4	1	0	0	0	1	0	Figures: (1);(3);(5)_x000D_ Nitrogen Isotherm: Figure 3(a)_x000D_ Compound: JLU-Liu3_x000D_ Porosity: N/A_x000D_ Hysteresis: Yes_x000D_ Saturation: 250 - 300 cm3/g_x000D_ Position: (0.6,0.45,1,0.7)	15	135	TP	TN	FP	TN	TP	TN
10.1021/cg500091k	Main	5	0	0	0	0	1	0	Figures: (5)_x000D_ Nitrogen Isotherm: Yes_x000D_ Compound: JLU-Liu3, JLU-Liu4_x000D_ Porosity: N/A_x000D_ Saturation: 25 - 30 cm??/g for JLU-Liu3, 20 - 25 cm??/g for JLU-Liu4_x000D_ Position: (0.50, 0.0, 1.0, 0.65)	5	5	TN	TN	TN	TN	TP	TN
10.1021/cg500091k	Main	6	0	0	0	0	0	1	Figures: (6) It does not have figures or have figures than not belong to above class_x000D_ Nitrogen Isotherm: No	6	6	TN	TN	TN	TN	TN	TP
10.1021/cg500121f	Supporting Information	1	0	0	0	1	0	0	Figures: (4) Crystal structure or topology illustration_x000D_ Nitrogen Isotherm: No	4	4	TN	TN	TN	TP	TN	TN
10.1021/cg500121f	Supporting Information	2	0	0	1	0	0	0	Figures: (3)_x000D_ Nitrogen Isotherm: No	3	3	TN	TN	TP	TN	TN	TN
10.1021/cg500121f	Supporting Information	3	0	1	0	0	0	0	Figures: (2);(5)_x000D_ Nitrogen Isotherm: No	2	25	TN	TP	TN	TN	FP	TN
10.1021/cg500121f	Supporting Information	4	0	1	0	0	0	0	Figures: (2)_x000D_ Nitrogen Isotherm: Figure S6_x000D_ Compound: 1_x000D_ Porosity: Incremental surface area as a function of pore width for 1 calculated from the adsorption branch of 77 K N2 using the Density Functional Model._x000D_ Hysteresis: No_x000D_ Saturation: 100 - 150 cm^3/g_x000D_ Position: (0, 0.5, 1, 1)	2	2	TN	TP	TN	TN	TN	TN
10.1021/cg500121f	Supporting Information	5	0	0	0	0	0	1	Figures: (5)_x000D_ Nitrogen Isotherm: Figure S8_x000D_ Compound: 2_x000D_ Porosity: N/A_x000D_ Hysteresis: Yes_x000D_ Saturation: 70 - 80 cm3/g_x000D_ Position: (0, 0.25, 1, 0.7)	6	5	TN	TN	TN	TN	FP	FN
10.1021/cg500121f	Supporting Information	6	0	0	0	0	1	0	Figures: (5)_x000D_ Nitrogen Isotherm: No_x000D_ Compound: N/A_x000D_ Porosity: N/A_x000D_ Hysteresis: N/A_x000D_ Saturation: N/A_x000D_ Position: N/A	5	5	TN	TN	TN	TN	TP	TN
10.1021/cg500121f	Supporting Information	7	0	0	0	0	1	0	Figures: (5) Other gas sorption isotherm (e.g. water vapor, co2, H2, CH4, etc.)_x000D_ Nitrogen Isotherm: No	5	5	TN	TN	TN	TN	TP	TN
10.1021/cg500121f	Supporting Information	8	0	0	0	0	1	0	Figures: (5)_x000D_ Nitrogen Isotherm: No	5	5	TN	TN	TN	TN	TP	TN
10.1021/cg500121f	Main	1	0	0	0	1	0	0	Figures: (4);(5)_x000D_ Nitrogen Isotherm: No	4	45	TN	TN	TN	TP	FP	TN
10.1021/cg500121f	Main	2	1	0	0	1	1	0	Figures: (1);(4);(5)_x000D_ Nitrogen Isotherm: Figure 3_x000D_ Compound: 1-N2, 2-N2_x000D_ Porosity: 737 m^2/g, the Brunauer???Emmett???Teller (BET) surface area of 658 and 552 m2 g-1, respectively._x000D_ Hysteresis: Yes_x000D_ Saturation: 200 - 250 cm3/g_x000D_ Position: (0.6,0.6,1,0.95)	145	145	TP	TN	TN	TP	TP	TN
10.1021/cg500121f	Main	3	0	0	0	0	1	0	Figures: (5)_x000D_ Nitrogen Isotherm: No	5	5	TN	TN	TN	TN	TP	TN
10.1021/cg500121f	Main	4	0	0	0	0	1	0	Figures: (5);(5);(5)_x000D_ Nitrogen Isotherm: No_x000D_	5	5	TN	TN	TN	TN	TP	TN
10.1021/cg500121f	Main	5	0	0	0	0	1	0	Figures: (5)_x000D_ Nitrogen Isotherm: Figure 8 c, d_x000D_ Compound: CO2, N2_x000D_ Porosity: N/A_x000D_ Hysteresis: No_x000D_ Saturation: c) 180-200 cm^3/g, d) 140-160 cm^3/g_x000D_ Position: (0.05, 0.45, 0.95, 0.75)	5	5	TN	TN	TN	TN	TP	TN
10.1021/cg500121f	Main	6	0	0	0	0	0	1	Figures: (6) It does not have figures or have figures than not belong to above class_x000D_ Nitrogen Isotherm: No	6	6	TN	TN	TN	TN	TN	TP
10.1021/cg500149s	Supporting Information	1	0	1	0	0	0	0	Figures: (2)_x000D_ Nitrogen Isotherm: No	2	2	TN	TP	TN	TN	TN	TN
10.1021/cg500149s	Supporting Information	2	0	1	0	0	0	0	Figures: (2);(2)_x000D_ Nitrogen Isotherm: No	2	2	TN	TP	TN	TN	TN	TN
10.1021/cg500149s	Supporting Information	3	0	1	0	0	0	0	Figures: (2);(5)_x000D_ Nitrogen Isotherm: No	2	25	TN	TP	TN	TN	FP	TN
10.1021/cg500149s	Supporting Information	4	0	0	0	1	0	0	Figures: (4);(5)_x000D_ Nitrogen Isotherm: Figure S6_x000D_ Compound: compound 2_x000D_ Porosity: N/A_x000D_ Hysteresis: Yes_x000D_ Saturation: 250-300 cm3/g_x000D_ Position: (0, 0, 0.75, 0.4)	4	45	TN	TN	TN	TP	FP	TN
10.1021/cg500149s	Supporting Information	5	0	0	0	1	0	0	Figures: (4) Crystal structure or topology illustration_x000D_ Nitrogen Isotherm: No	4	4	TN	TN	TN	TP	TN	TN
10.1021/cg500149s	Supporting Information	6	0	0	0	1	0	0	Figures: (4)_x000D_ Nitrogen Isotherm: No	4	4	TN	TN	TN	TP	TN	TN
10.1021/cg500149s	Supporting Information	7	0	0	0	1	0	0	Figures: (4)_x000D_ Nitrogen Isotherm: No	4	4	TN	TN	TN	TP	TN	TN
10.1021/cg500149s	Supporting Information	8	0	0	0	1	0	0	Figures: (4)_x000D_ Nitrogen Isotherm: No	4	4	TN	TN	TN	TP	TN	TN
10.1021/cg500149s	Supporting Information	9	0	0	0	1	0	0	Figures: (4) Crystal structure or topology illustration_x000D_ Nitrogen Isotherm: No	4	4	TN	TN	TN	TP	TN	TN
10.1021/cg500149s	Supporting Information	10	0	0	0	1	0	0	Figures: (4) Crystal structure or topology illustration_x000D_ Nitrogen Isotherm: No	4	4	TN	TN	TN	TP	TN	TN
10.1021/cg500149s	Supporting Information	11	0	0	1	0	0	0	Figures: (3);(5)_x000D_ Nitrogen Isotherm: Figure S24_x000D_ Compound: compound 2_x000D_ Porosity: N/A_x000D_ Hysteresis: Yes_x000D_ Saturation: I do not know_x000D_ Position: (0, 0.4, 1, 1)	3	35	TN	TN	TP	TN	FP	TN
10.1021/cg500149s	Supporting Information	12	1	0	0	0	1	0	Figures: (1);(5)_x000D_ Nitrogen Isotherm: Figure S25; Figure S26_x000D_ Compound: Compound 3; Compound 4_x000D_ Porosity: N/A_x000D_ Saturation: Figure S25: 3 - 3.5 cm^3/g; Figure S26: 6 - 7 cm^3/g_x000D_ Position: (0,0,1,0.6)	15	15	TP	TN	TN	TN	TP	TN
10.1021/cg500149s	Supporting Information	13	0	0	0	0	0	1	Figures: [Answer: (6) It does not have figures or have figures than not belong to above class]_x000D_ Nitrogen Isotherm: No	6	6	TN	TN	TN	TN	TN	TP
10.1021/cg500149s	Supporting Information	14	0	0	0	0	0	1	Figures: (6) It does not have figures or have figures than not belong to the above class_x000D_ Nitrogen Isotherm: No	6	6	TN	TN	TN	TN	TN	TP
10.1021/cg500149s	Supporting Information	15	0	0	0	0	0	1	Figures: (6) It does not have figures or have figures than not belong to above class_x000D_ Nitrogen Isotherm: No	6	6	TN	TN	TN	TN	TN	TP
10.1021/cg500149s	Main	1	0	0	0	0	0	1	Figures: (6) It does not have figures or have figures than not belong to above class_x000D_ Nitrogen Isotherm: No	6	6	TN	TN	TN	TN	TN	TP
10.1021/cg500149s	Main	2	0	0	0	0	0	1	Figures: (6) It does not have figures or have figures than not belong to above class_x000D_ Nitrogen Isotherm: No	6	6	TN	TN	TN	TN	TN	TP
10.1021/cg500149s	Main	3	0	0	0	1	0	0	Figures: (4);(6)_x000D_ Nitrogen Isotherm: No	4	46	TN	TN	TN	TP	TN	FP
10.1021/cg500149s	Main	4	0	0	0	1	0	0	Figures: (4);(6)_x000D_ Nitrogen Isotherm: No	4	46	TN	TN	TN	TP	TN	FP
10.1021/cg500149s	Main	5	0	0	0	1	0	0	Figures: (4) Crystal structure or topology illustration_x000D_ Nitrogen Isotherm: No	4	4	TN	TN	TN	TP	TN	TN
10.1021/cg500149s	Main	6	0	0	0	1	0	0	Figures: (4) Crystal structure or topology illustration_x000D_ Nitrogen Isotherm: No	4	4	TN	TN	TN	TP	TN	TN
10.1021/cg500149s	Main	7	0	0	0	1	0	0	Figures: (4) Crystal structure or topology illustration_x000D_ Nitrogen Isotherm: No	4	4	TN	TN	TN	TP	TN	TN
10.1021/cg500149s	Main	8	0	0	0	1	0	0	Figures: (4) Crystal structure or topology illustration_x000D_ Nitrogen Isotherm: No	4	4	TN	TN	TN	TP	TN	TN
10.1021/cg500149s	Main	9	1	0	0	0	1	0	Figures: (1);(5)_x000D_ Nitrogen Isotherm: Figure 6, Figure 7_x000D_ Compound: Compound 1 (from Figure 6), Compound 2 (from Figure 7)_x000D_ Porosity: N/A_x000D_ Saturation: Figure 6: 60 - 70 cm^3/g, Figure 7: 40 - 50 cm^3/g_x000D_ Position: (0,0.2,0.5,0.65) for Figure 6 and its description, (0.5,0.2,1,0.65) for Figure 7 and its description.	15	15	TP	TN	TN	TN	TP	TN
10.1021/cg500149s	Main	10	0	0	0	0	1	0	Figures: (5)_x000D_ Nitrogen Isotherm: No	5	5	TN	TN	TN	TN	TP	TN
10.1021/cg500149s	Main	11	0	0	0	0	0	1	Figures: [Answer: (6) It does not have figures or have figures than not belong to above class]_x000D_ Nitrogen Isotherm: No	6	6	TN	TN	TN	TN	TN	TP
10.1021/cg500149s	Main	12	0	0	0	0	0	1	Figures: (6) It does not have figures or have figures than not belong to above class_x000D_ Nitrogen Isotherm: No	6	6	TN	TN	TN	TN	TN	TP
10.1021/cg500192d	Supporting Information	1	0	0	0	0	0	1	Figures: (6) It does not have figures or have figures than not belong to the above class._x000D_ Nitrogen Isotherm: No.	6	6	TN	TN	TN	TN	TN	TP
10.1021/cg500192d	Supporting Information	2	0	1	0	1	0	0	Figures: (2);(4)_x000D_ Nitrogen Isotherm: No	24	24	TN	TP	TN	TP	TN	TN
10.1021/cg500192d	Supporting Information	3	0	1	0	1	0	0	Figures: (2);(4)_x000D_ Nitrogen Isotherm: No	24	24	TN	TP	TN	TP	TN	TN
10.1021/cg500192d	Supporting Information	4	0	1	0	0	0	0	Figures: (2)_x000D_ Nitrogen Isotherm: No	2	2	TN	TP	TN	TN	TN	TN
10.1021/cg500192d	Supporting Information	5	0	0	0	0	0	1	Figures: (6) It does not have figures or have figures than not belong to above class_x000D_ Nitrogen Isotherm: No	6	6	TN	TN	TN	TN	TN	TP
10.1021/cg500192d	Supporting Information	6	0	0	0	0	0	1	Figures: (6) It does not have figures or have figures than not belong to above class_x000D_ Nitrogen Isotherm: No	6	6	TN	TN	TN	TN	TN	TP
10.1021/cg500192d	Supporting Information	7	0	0	0	0	0	1	Figures: (6) It does not have figures or have figures than not belong to above class_x000D_ Nitrogen Isotherm: No	6	6	TN	TN	TN	TN	TN	TP
10.1021/cg500192d	Main	1	0	0	0	1	0	0	Figures: (4);(5);(6)_x000D_ Nitrogen Isotherm: No	4	456	TN	TN	TN	TP	FP	FP
10.1021/cg500192d	Main	2	0	0	0	1	0	0	Figures: (4)_x000D_ Nitrogen Isotherm: No	4	4	TN	TN	TN	TP	TN	TN
10.1021/cg500192d	Main	3	0	0	0	1	0	0	Figures: (4) Crystal structure or topology illustration_x000D_ Nitrogen Isotherm: No	4	4	TN	TN	TN	TP	TN	TN
10.1021/cg500192d	Main	4	0	0	0	1	1	0	Figures: (1);(5)_x000D_ Nitrogen Isotherm: Figure 6_x000D_ Compound: porph@MOM-11, porph@MOM-12, porph@MOM-13_x000D_ Porosity: Yes_x000D_ Hysteresis: No_x000D_ Saturation: 90 - 110 cm??/g_x000D_ Position: (0.05, 0.65, 0.55, 0.95)	45	15	FP	TN	TN	FN	TP	TN
10.1021/cg500192d	Main	5	0	0	0	0	0	1	Figures: (6) It does not have figures or have figures than not belong to above class_x000D_ Nitrogen Isotherm: No	6	6	TN	TN	TN	TN	TN	TP
10.1021/cg5008236	Supporting Information	1	0	0	0	0	0	1	Figures: [Answer: (6) It does not have figures or have figures than not belong to above class]_x000D_ Nitrogen Isotherm: No	6	6	TN	TN	TN	TN	TN	TP
10.1021/cg5008236	Supporting Information	2	0	0	0	1	0	0	Figures: (4)_x000D_ Nitrogen Isotherm: No	4	4	TN	TN	TN	TP	TN	TN
10.1021/cg5008236	Supporting Information	3	0	0	0	1	0	0	Figures: (4)_x000D_ Nitrogen Isotherm: No	4	4	TN	TN	TN	TP	TN	TN
10.1021/cg5008236	Supporting Information	4	0	0	0	1	0	0	Figures: (4)_x000D_ Nitrogen Isotherm: No	4	4	TN	TN	TN	TP	TN	TN
10.1021/cg5008236	Supporting Information	5	0	0	0	0	0	1	Figures: (6) It does not have figures or have figures than not belong to above class_x000D_ Nitrogen Isotherm: No	6	6	TN	TN	TN	TN	TN	TP
10.1021/cg5008236	Supporting Information	6	0	0	0	0	0	1	Figures: [Answer: (6) It does not have figures or have figures that do not belong to the above class]_x000D_ Nitrogen Isotherm: No	6	6	TN	TN	TN	TN	TN	TP
10.1021/cg5008236	Supporting Information	7	0	0	1	0	0	0	Figures: (3)_x000D_ Nitrogen Isotherm: Figure S4_x000D_ Compound: 1_x000D_ Porosity: N/A_x000D_ Hysteresis: Yes_x000D_ Saturation: 300 - 400 cm3/g_x000D_ Position: (0,0,1,1)	3	3	TN	TN	TP	TN	TN	TN
10.1021/cg5008236	Supporting Information	8	0	0	1	0	0	0	Figures: (3)_x000D_ Nitrogen Isotherm: No	3	3	TN	TN	TP	TN	TN	TN
10.1021/cg5008236	Supporting Information	9	0	0	0	0	0	1	Figures: (6) It does not have figures or have figures than not belong to above class_x000D_ Nitrogen Isotherm: No	6	6	TN	TN	TN	TN	TN	TP
10.1021/cg5008236	Supporting Information	10	1	0	0	0	0	0	Figures: (1)_x000D_ Nitrogen Isotherm: Figure S8; Figure S9_x000D_ Compound: N/A_x000D_ Porosity: N/A_x000D_ Hysteresis: Yes_x000D_ Saturation: Figure S8: 60 - 70 cm3/g; Figure S9: 80 - 90 cm3/g_x000D_ Position: (0,0,1,0.5); (0.5,0,1,1)	1	1	TP	TN	TN	TN	TN	TN
10.1021/cg5008236	Supporting Information	11	0	0	0	0	1	0	Figures: (5)_x000D_ Nitrogen Isotherm: No	5	5	TN	TN	TN	TN	TP	TN
10.1021/cg5008236	Supporting Information	12	0	1	0	0	0	0	Figures: (2)_x000D_ Nitrogen Isotherm: No	2	2	TN	TP	TN	TN	TN	TN
10.1021/cg5008236	Main	1	0	0	0	0	0	1	Figures: (6) It does not have figures or have figures that not belong to the above class_x000D_ Nitrogen Isotherm: No	6	6	TN	TN	TN	TN	TN	TP
10.1021/cg5008236	Main	2	0	0	0	0	0	1	Figures: (6) It does not have figures or have figures than not belong to above class_x000D_ Nitrogen Isotherm: No	6	6	TN	TN	TN	TN	TN	TP
10.1021/cg5008236	Main	3	0	0	0	0	0	1	Figures: (6) It does not have figures or have figures than not belong to above class_x000D_ Nitrogen Isotherm: No	6	6	TN	TN	TN	TN	TN	TP
10.1021/cg5008236	Main	4	0	0	0	1	0	0	Figures: (4)_x000D_ Nitrogen Isotherm: No	4	4	TN	TN	TN	TP	TN	TN
10.1021/cg5008236	Main	5	0	0	0	1	0	0	Figures: (4)_x000D_ Nitrogen Isotherm: No	4	4	TN	TN	TN	TP	TN	TN
10.1021/cg5008236	Main	6	0	0	0	0	0	1	Figures: (6) It does not have figures or have figures than not belong to above class_x000D_ Nitrogen Isotherm: No	6	6	TN	TN	TN	TN	TN	TP
10.1021/cg5008236	Main	7	0	0	0	0	0	1	Figures: (6) It does not have figures or have figures than not belong to above class_x000D_ Nitrogen Isotherm: No	6	6	TN	TN	TN	TN	TN	TP
10.1021/cg5008236	Main	8	0	0	0	0	0	1	The image provided seems to be of a text section from a scientific article, specifically a citation or reference section from "Crystal Growth & Design" with a reference number (31). However, there are no figures or graphs visible in the image; therefore, I can't provide an analysis of figures such as a nitrogen isotherm, PXRD pattern, TGA curve, crystal structure, or gas adsorption isotherms. _x0…	6	6	TN	TN	TN	TN	TN	TP
10.1021/cg501012e	Supporting Information	1	0	0	0	0	0	1	Figures: [Answer: (6) It does not have figures or have figures that not belong to the above class]_x000D_ Nitrogen Isotherm: No	6	6	TN	TN	TN	TN	TN	TP
10.1021/cg501012e	Supporting Information	2	0	0	0	0	0	1	Figures: (6) It does not have figures or have figures than not belong to above class_x000D_ Nitrogen Isotherm: No	6	6	TN	TN	TN	TN	TN	TP
10.1021/cg501012e	Supporting Information	3	0	0	0	0	0	1	Figures: (6) It does not have figures or have figures than not belong to the above class_x000D_ Nitrogen Isotherm: No	6	6	TN	TN	TN	TN	TN	TP
10.1021/cg501012e	Supporting Information	4	0	0	0	0	0	1	Figures: (6) It does not have figures or have figures than not belong to the above class_x000D_ Nitrogen Isotherm: No	6	6	TN	TN	TN	TN	TN	TP
10.1021/cg501012e	Supporting Information	5	0	0	0	1	0	0	Figures: (4)_x000D_ Nitrogen Isotherm: No	4	4	TN	TN	TN	TP	TN	TN
10.1021/cg501012e	Supporting Information	6	0	0	0	1	0	0	Figures: (4) Crystal structure or topology illustration_x000D_ Nitrogen Isotherm: No	4	4	TN	TN	TN	TP	TN	TN
10.1021/cg501012e	Supporting Information	7	0	1	1	0	0	0	Figures: (2);(3)_x000D_ Nitrogen Isotherm: No	23	23	TN	TP	TP	TN	TN	TN
10.1021/cg501012e	Supporting Information	8	0	0	0	0	0	1	Figures: (6) It does not have figures or have figures than not belong to above class_x000D_ Nitrogen Isotherm: No	6	6	TN	TN	TN	TN	TN	TP
10.1021/cg501012e	Supporting Information	9	0	0	0	0	0	1	Figures: (4)_x000D_ Nitrogen Isotherm: No	6	4	TN	TN	TN	FP	TN	FN
10.1021/cg501012e	Supporting Information	10	0	0	0	0	0	1	Figures: (6) It does not have figures or have figures that do not belong to the above class_x000D_ Nitrogen Isotherm: No	6	6	TN	TN	TN	TN	TN	TP
10.1021/cg501012e	Main	1	0	0	0	1	0	0	Figures: (4);(6)_x000D_ Nitrogen Isotherm: No	4	46	TN	TN	TN	TP	TN	FP
10.1021/cg501012e	Main	2	0	0	0	1	0	0	Figures: (4)_x000D_ Nitrogen Isotherm: No	4	4	TN	TN	TN	TP	TN	TN
10.1021/cg501012e	Main	3	0	0	0	0	0	1	Figures: (2);(3)_x000D_ Nitrogen Isotherm: No	6	23	TN	FP	FP	TN	TN	FN
10.1021/cg501012e	Main	4	0	0	0	0	0	1	Figures: (6) It does not have figures or have figures that do not belong to the above class_x000D_ Nitrogen Isotherm: No	6	6	TN	TN	TN	TN	TN	TP
10.1021/cg5010616	Supporting Information	1	0	0	0	0	0	1	The provided image contains text and no figures, graphs, or illustrations. It appears to be a title page or introductory section of a supporting information document for a research paper. The text mentions the topic of the research, which includes clathration of aromatic rings within a bimetallic metal-organic framework, and lists the authors of the study._x000D_ _x000D_ Based on the content visi…	6	6	TN	TN	TN	TN	TN	TP
10.1021/cg5010616	Supporting Information	2	0	0	1	0	0	0	Figures: (3)_x000D_ Nitrogen Isotherm: No	3	3	TN	TN	TP	TN	TN	TN
10.1021/cg5010616	Supporting Information	3	0	0	0	1	0	0	Figures: (4)_x000D_ Nitrogen Isotherm: No	4	4	TN	TN	TN	TP	TN	TN
10.1021/cg5010616	Supporting Information	4	0	0	0	1	0	0	Figures: (4) Crystal structure or topology illustration_x000D_ Nitrogen Isotherm: No	4	4	TN	TN	TN	TP	TN	TN
10.1021/cg5010616	Supporting Information	5	0	0	0	1	0	0	Figures: (4) Crystal structure or topology illustration_x000D_ Nitrogen Isotherm: No	4	4	TN	TN	TN	TP	TN	TN
10.1021/cg5010616	Main	1	0	0	0	0	0	1	Figures: (6) It does not have figures or have figures than not belong to above class_x000D_ Nitrogen Isotherm: No	6	6	TN	TN	TN	TN	TN	TP
10.1021/cg5010616	Main	2	0	0	0	0	0	1	Figures: (6) It does not have figures or have figures than not belong to above class_x000D_ Nitrogen Isotherm: No	6	6	TN	TN	TN	TN	TN	TP
10.1021/cg5010616	Main	3	0	0	0	0	0	1	Figures: (6) It does not have figures or have figures than not belong to above class_x000D_ Nitrogen Isotherm: No	6	6	TN	TN	TN	TN	TN	TP
10.1021/cg5010616	Main	4	0	0	0	1	0	0	Figures: (4)_x000D_ Nitrogen Isotherm: No	4	4	TN	TN	TN	TP	TN	TN
10.1021/cg5010616	Main	5	0	0	0	1	0	0	Figures: (4) Crystal structure or topology illustration_x000D_ Nitrogen Isotherm: No	4	4	TN	TN	TN	TP	TN	TN
10.1021/cg5010616	Main	6	0	0	0	1	0	0	Figures: (4)_x000D_ Nitrogen Isotherm: No	4	4	TN	TN	TN	TP	TN	TN
10.1021/cg5010616	Main	7	0	0	0	0	0	1	Figures: (6) It does not have figures or have figures than not belong to above class_x000D_ Nitrogen Isotherm: No	6	6	TN	TN	TN	TN	TN	TP
10.1021/cg5010616	Main	8	0	0	0	0	0	1	Figures: (6) It does not have figures or have figures than not belong to above class_x000D_ Nitrogen Isotherm: No	6	6	TN	TN	TN	TN	TN	TP
10.1021/cg5010616	Main	9	0	0	0	0	0	1	Figures: (6) It does not have figures or have figures than not belong to above class_x000D_ Nitrogen Isotherm: No	6	6	TN	TN	TN	TN	TN	TP
10.1021/cg501141m	Supporting Information	1	0	0	0	0	0	1	Figures: [Answer: (6)]_x000D_ Nitrogen Isotherm: No	6	6	TN	TN	TN	TN	TN	TP
10.1021/cg501141m	Supporting Information	2	0	0	0	0	0	1	Figures: (6) It does not have figures or have figures than not belong to above class_x000D_ Nitrogen Isotherm: No	6	6	TN	TN	TN	TN	TN	TP
10.1021/cg501141m	Supporting Information	3	0	0	0	0	0	1	Figures: (6) It does not have figures or have figures than not belong to above class_x000D_ Nitrogen Isotherm: No	6	6	TN	TN	TN	TN	TN	TP
10.1021/cg501141m	Supporting Information	4	0	0	0	1	0	0	Figures: (4)_x000D_ Nitrogen Isotherm: No	4	4	TN	TN	TN	TP	TN	TN
10.1021/cg501141m	Supporting Information	5	0	0	0	0	0	1	Figures: (6) It does not have figures or have figures than not belong to the above class_x000D_ Nitrogen Isotherm: No	6	6	TN	TN	TN	TN	TN	TP
10.1021/cg501141m	Supporting Information	6	0	1	0	0	0	0	Figures: (2) PXRD pattern_x000D_ Nitrogen Isotherm: No	2	2	TN	TP	TN	TN	TN	TN
10.1021/cg501141m	Supporting Information	7	0	0	0	0	0	1	Figures: (6) It does not have figures or have figures than not belong to above class_x000D_ Nitrogen Isotherm: No	6	6	TN	TN	TN	TN	TN	TP
10.1021/cg501141m	Supporting Information	8	0	0	0	0	0	1	Figures: (6) It does not have figures or have figures than not belong to above class_x000D_ Nitrogen Isotherm: No	6	6	TN	TN	TN	TN	TN	TP
10.1021/cg501141m	Supporting Information	9	0	0	1	0	0	0	Figures: (3)_x000D_ Nitrogen Isotherm: No	3	3	TN	TN	TP	TN	TN	TN
10.1021/cg501141m	Supporting Information	10	0	0	0	0	0	1	Figures: (6) It does not have figures or have figures than not belong to above class_x000D_ Nitrogen Isotherm: No	6	6	TN	TN	TN	TN	TN	TP
10.1021/cg501141m	Supporting Information	11	0	0	0	0	0	1	Figures: (6) It does not have figures or have figures than not belong to above class_x000D_ Nitrogen Isotherm: No	6	6	TN	TN	TN	TN	TN	TP
10.1021/cg501141m	Supporting Information	12	0	0	0	0	1	0	Figures: (5) Other gas sorption isotherm (e.g. water vapor, co2, H2, CH4, etc.)_x000D_ Nitrogen Isotherm: No	5	5	TN	TN	TN	TN	TP	TN
10.1021/cg501141m	Supporting Information	13	0	0	0	0	1	0	Figures: (5) Other gas sorption isotherm (e.g. water vapor, CO2, H2, CH4, etc.)_x000D_ Nitrogen Isotherm: No	5	5	TN	TN	TN	TN	TP	TN
10.1021/cg501141m	Supporting Information	14	0	0	0	0	1	0	Figures: (5)_x000D_ Nitrogen Isotherm: No_x000D_ Compound: N/A_x000D_ Porosity: N/A_x000D_ Hysteresis: N/A_x000D_ Saturation: N/A_x000D_ Position: N/A	5	5	TN	TN	TN	TN	TP	TN
10.1021/cg501141m	Supporting Information	15	0	0	0	0	0	1	Figures: (5)_x000D_ Nitrogen Isotherm: No	6	5	TN	TN	TN	TN	FP	FN
10.1021/cg501141m	Main	1	0	0	0	0	0	1	Figures: [Answer: (6) It does not have figures or have figures than not belong to above class]_x000D_ Nitrogen Isotherm: No	6	6	TN	TN	TN	TN	TN	TP
10.1021/cg501141m	Main	2	0	0	0	0	0	1	Figures: (6) It does not have figures or have figures than not belong to above class_x000D_ Nitrogen Isotherm: No	6	6	TN	TN	TN	TN	TN	TP
10.1021/cg501141m	Main	3	0	0	0	1	0	0	Figures: (4);(6)_x000D_ Nitrogen Isotherm: No	4	46	TN	TN	TN	TP	TN	FP
10.1021/cg501141m	Main	4	0	0	0	1	0	0	Figures: (4)_x000D_ Nitrogen Isotherm: No	4	4	TN	TN	TN	TP	TN	TN
10.1021/cg501141m	Main	5	0	0	0	1	0	0	Figures: (4)_x000D_ Nitrogen Isotherm: No	4	4	TN	TN	TN	TP	TN	TN
10.1021/cg501141m	Main	6	0	0	0	0	0	1	Figures: (5)_x000D_ Nitrogen Isotherm: Figure 5._x000D_ Compound: Cox_INA_x000D_ Porosity: N/A_x000D_ Hysteresis: Yes_x000D_ Saturation: 25-30 cm^3/g_x000D_ Position: (0.5, 0.55, 1, 0.75)	6	5	TN	TN	TN	TN	FP	FN
10.1021/cg501141m	Main	7	1	0	0	0	1	0	Figures: (1);(5)_x000D_ Nitrogen Isotherm: Figure 6_x000D_ Compound: Co/INA_x000D_ Porosity: BET area was found to be 910 m^2 g^???1; P/P0 = 0.99, pore volume is 0.39 cm^3 g^???1_x000D_ Hysteresis: Yes_x000D_ Saturation: 200 - 250 cm^3/g_x000D_ Position: (0.05,0.6,0.55,0.85)	15	15	TP	TN	TN	TN	TP	TN
10.1021/cg501141m	Main	8	0	0	0	0	0	1	Figures: (6) It does not have figures or have figures than not belong to the above class_x000D_ Nitrogen Isotherm: No	6	6	TN	TN	TN	TN	TN	TP
10.1021/cg501141m	Main	9	0	0	0	0	0	1	Figures: (6) It does not have figures or have figures than not belong to the above class_x000D_ Nitrogen Isotherm: No	6	6	TN	TN	TN	TN	TN	TP
10.1021/cg501231v	Supporting Information	1	0	0	0	0	0	1	Figures: [Answer: (6) It does not have figures or have figures than not belong to above class]_x000D_ Nitrogen Isotherm: No	6	6	TN	TN	TN	TN	TN	TP
10.1021/cg501231v	Supporting Information	2	0	1	0	0	0	0	Figures: (2)_x000D_ Nitrogen Isotherm: No	2	2	TN	TP	TN	TN	TN	TN
10.1021/cg501231v	Supporting Information	3	0	0	1	0	0	0	Figures: (3)_x000D_ Nitrogen Isotherm: Figure S2_x000D_ Compound: [Ag(dabco)2]??(BF4)??5(CH3CN)??(H2O)1a_x000D_ Porosity: N/A_x000D_ Hysteresis: I do not know_x000D_ Saturation: 80-100%_x000D_ Position: (0,0,1,0.5)	3	3	TN	TN	TP	TN	TN	TN
10.1021/cg501231v	Supporting Information	4	0	1	1	0	0	0	Figures: (2);(3)_x000D_ Nitrogen Isotherm: No	23	23	TN	TP	TP	TN	TN	TN
10.1021/cg501231v	Supporting Information	5	0	0	0	0	0	1	Figures: (3);(5)_x000D_ Nitrogen Isotherm: No	6	35	TN	TN	FP	TN	FP	FN
10.1021/cg501231v	Supporting Information	6	0	0	1	0	0	0	Figures: (3)_x000D_ Nitrogen Isotherm: Figure S6_x000D_ Compound: [Ag(dabco)2]??(BF4)??5(CH3CN)??(H2O) 1a_x000D_ Porosity: N/A_x000D_ Hysteresis: No_x000D_ Saturation: 60-80%_x000D_ Position: (0, 0.3, 1, 0.6)	3	3	TN	TN	TP	TN	TN	TN
10.1021/cg501231v	Supporting Information	7	0	1	0	0	0	0	Figures: (2)_x000D_ Nitrogen Isotherm: No	2	2	TN	TP	TN	TN	TN	TN
10.1021/cg501231v	Supporting Information	8	0	1	1	0	0	0	Figures: (3);(2)_x000D_ Nitrogen Isotherm: No	23	23	TN	TP	TP	TN	TN	TN
10.1021/cg501231v	Supporting Information	9	0	0	0	0	0	1	Figures: (6) It does not have figures or have figures that not belong to the above class_x000D_ Nitrogen Isotherm: No	6	6	TN	TN	TN	TN	TN	TP
10.1021/cg501231v	Supporting Information	10	0	0	0	1	0	0	Figures: (4) Crystal structure or topology illustration_x000D_ Nitrogen Isotherm: No	4	4	TN	TN	TN	TP	TN	TN
10.1021/cg501231v	Supporting Information	11	0	0	0	1	0	0	Figures: (4)_x000D_ Nitrogen Isotherm: No	4	4	TN	TN	TN	TP	TN	TN
10.1021/cg501231v	Supporting Information	12	0	0	0	0	0	1	Figures: (6) It does not have figures or have figures than not belong to above class_x000D_ Nitrogen Isotherm: No	6	6	TN	TN	TN	TN	TN	TP
10.1021/cg501231v	Supporting Information	13	0	0	0	0	0	1	Figures: (6) It does not have figures or have figures that do not belong to the above class_x000D_ Nitrogen Isotherm: No	6	6	TN	TN	TN	TN	TN	TP
10.1021/cg501231v	Supporting Information	14	0	0	0	0	0	1	Figures: (6) It does not have figures or have figures than not belong to the above class._x000D_ Nitrogen Isotherm: No.	6	6	TN	TN	TN	TN	TN	TP
10.1021/cg501231v	Supporting Information	15	0	0	0	0	0	1	Figures: (6) It does not have figures or have figures than not belong to above class_x000D_ Nitrogen Isotherm: No	6	6	TN	TN	TN	TN	TN	TP
10.1021/cg501231v	Supporting Information	16	0	0	0	0	0	1	Figures: (6) It does not have figures or have figures than not belong to above class_x000D_ Nitrogen Isotherm: No	6	6	TN	TN	TN	TN	TN	TP
10.1021/cg501231v	Main	1	0	0	0	1	0	0	Figures: (4);(6)_x000D_ Nitrogen Isotherm: No	4	46	TN	TN	TN	TP	TN	FP
10.1021/cg501231v	Main	2	0	0	0	1	0	0	Figures: (4) Crystal structure or topology illustration_x000D_ Nitrogen Isotherm: No	4	4	TN	TN	TN	TP	TN	TN
10.1021/cg501231v	Main	3	0	0	0	0	0	1	Figures: (4);(5)_x000D_ Nitrogen Isotherm: No	6	45	TN	TN	TN	FP	FP	FN
10.1021/cg501231v	Main	4	0	0	0	1	0	0	Figures: (4);(6)_x000D_ Nitrogen Isotherm: No	4	46	TN	TN	TN	TP	TN	FP
10.1021/cg501231v	Main	5	0	0	0	0	0	1	Figures: (6) It does not have figures or have figures than not belong to above class_x000D_ Nitrogen Isotherm: No	6	6	TN	TN	TN	TN	TN	TP
10.1021/cg5012617	Supporting Information	1	0	0	0	0	0	1	Figures: (6) It does not have figures or have figures than not belong to above class_x000D_ Nitrogen Isotherm: No	6	6	TN	TN	TN	TN	TN	TP
10.1021/cg5012617	Supporting Information	2	0	0	0	1	0	0	Figures: (4) Crystal structure or topology illustration_x000D_ Nitrogen Isotherm: No	4	4	TN	TN	TN	TP	TN	TN
10.1021/cg5012617	Supporting Information	3	0	0	0	1	0	0	Figures: (4)_x000D_ Nitrogen Isotherm: No	4	4	TN	TN	TN	TP	TN	TN
10.1021/cg5012617	Supporting Information	4	0	1	0	0	0	0	Figures: (2) PXRD pattern_x000D_ Nitrogen Isotherm: No	2	2	TN	TP	TN	TN	TN	TN
10.1021/cg5012617	Supporting Information	5	0	1	0	0	0	0	Figures: (2)_x000D_ Nitrogen Isotherm: No	2	2	TN	TP	TN	TN	TN	TN
10.1021/cg5012617	Supporting Information	6	0	0	0	0	0	1	Figures: (6) It does not have figures or have figures than not belong to above class_x000D_ Nitrogen Isotherm: No	6	6	TN	TN	TN	TN	TN	TP
10.1021/cg5012617	Supporting Information	7	0	0	0	0	0	1	Figures: (6) It does not have figures or have figures than not belong to the above class_x000D_ Nitrogen Isotherm: No	6	6	TN	TN	TN	TN	TN	TP
10.1021/cg5012617	Supporting Information	8	0	0	0	0	0	1	Figures: (6) It does not have figures or have figures than not belong to above class_x000D_ Nitrogen Isotherm: No	6	6	TN	TN	TN	TN	TN	TP
10.1021/cg5012617	Supporting Information	9	0	0	0	0	0	1	Figures: (6) It does not have figures or have figures than not belong to above class_x000D_ Nitrogen Isotherm: No	6	6	TN	TN	TN	TN	TN	TP
10.1021/cg5012617	Supporting Information	10	0	0	0	0	0	1	Figures: (6) It does not have figures or have figures than not belong to above class_x000D_ Nitrogen Isotherm: No	6	6	TN	TN	TN	TN	TN	TP
10.1021/cg5012617	Supporting Information	11	0	0	0	0	0	1	The image shows a scientific document page containing figures and a table with numerical data._x000D_ _x000D_ 1. The figures in the image represent plots of AC susceptibilities, specifically, they are not among the specified types like nitrogen isotherms, PXRD patterns, TGA curves, or crystal structure/topology illustrations. They do not match with a gas sorption isotherm for water vapor, CO2, H2…	6	6	TN	TN	TN	TN	TN	TP
10.1021/cg5012617	Supporting Information	12	0	0	0	0	0	1	Figures: (6) It does not have figures or have figures than not belong to above class_x000D_ Nitrogen Isotherm: No	6	6	TN	TN	TN	TN	TN	TP
10.1021/cg5012617	Supporting Information	13	0	0	0	0	0	1	Figures: (6) It does not have figures or have figures than not belong to above class_x000D_ Nitrogen Isotherm: No	6	6	TN	TN	TN	TN	TN	TP
10.1021/cg5012617	Supporting Information	14	0	0	0	0	0	1	Figures: [Answer: (6) It does not have figures or have figures than not belong to above class]_x000D_ Nitrogen Isotherm: No	6	6	TN	TN	TN	TN	TN	TP
10.1021/cg5012617	Main	1	0	0	0	1	0	0	Figures: (4)_x000D_ Nitrogen Isotherm: No	4	4	TN	TN	TN	TP	TN	TN
10.1021/cg5012617	Main	2	0	0	0	0	0	1	Figures: (6) It does not have figures or have figures than not belong to above class_x000D_ Nitrogen Isotherm: No	6	6	TN	TN	TN	TN	TN	TP
10.1021/cg5012617	Main	3	0	0	0	1	0	0	Figures: (4)_x000D_ Nitrogen Isotherm: No	4	4	TN	TN	TN	TP	TN	TN
10.1021/cg5012617	Main	4	0	0	0	1	0	0	Figures: (4) Crystal structure or topology illustration_x000D_ Nitrogen Isotherm: No	4	4	TN	TN	TN	TP	TN	TN
10.1021/cg5012617	Main	5	0	0	0	1	0	0	Figures: (4)_x000D_ Nitrogen Isotherm: No	4	4	TN	TN	TN	TP	TN	TN
10.1021/cg5012617	Main	6	0	0	0	1	0	0	Figures: (4) Crystal structure or topology illustration_x000D_ Nitrogen Isotherm: No	4	4	TN	TN	TN	TP	TN	TN
10.1021/cg5012617	Main	7	0	0	0	1	0	0	Figures: (4)_x000D_ Nitrogen Isotherm: No	4	4	TN	TN	TN	TP	TN	TN
10.1021/cg5012617	Main	8	0	0	0	1	0	0	Figures: (4) Crystal structure or topology illustration_x000D_ Nitrogen Isotherm: No	4	4	TN	TN	TN	TP	TN	TN
10.1021/cg5012617	Main	9	0	0	0	0	0	1	Figures: (6) It does not have figures or have figures than not belong to above class_x000D_ Nitrogen Isotherm: No	6	6	TN	TN	TN	TN	TN	TP
10.1021/cg5012617	Main	10	0	0	0	0	0	1	Figures: (2);(5)_x000D_ Nitrogen Isotherm: No	6	25	TN	FP	TN	TN	FP	FN
10.1021/cg5012617	Main	11	0	0	0	0	0	1	Figures: [Answer: (6) It does not have figures or have figures that do not belong to the above class]_x000D_ Nitrogen Isotherm: No	6	6	TN	TN	TN	TN	TN	TP
10.1021/cg5012617	Main	12	0	0	0	0	0	1	Figures: [Answer: (6) It does not have figures or have figures than not belong to above class]_x000D_ Nitrogen Isotherm: No	6	6	TN	TN	TN	TN	TN	TP
10.1021/cg501279y	Supporting Information	1	0	0	0	0	0	1	Figures: [Answer: (6) It does not have figures or have figures than not belong to above class]_x000D_ Nitrogen Isotherm: No	6	6	TN	TN	TN	TN	TN	TP
10.1021/cg501279y	Supporting Information	2	0	0	0	0	0	1	Figures: (6) It does not have figures or have figures than not belong to above class_x000D_ Nitrogen Isotherm: No	6	6	TN	TN	TN	TN	TN	TP
10.1021/cg501279y	Supporting Information	3	0	0	0	0	0	1	Figures: (6) It does not have figures or have figures than not belong to above class_x000D_ Nitrogen Isotherm: No	6	6	TN	TN	TN	TN	TN	TP
10.1021/cg501279y	Supporting Information	4	0	0	0	0	0	1	Figures: (6)_x000D_ Nitrogen Isotherm: No	6	6	TN	TN	TN	TN	TN	TP
10.1021/cg501279y	Supporting Information	5	0	0	0	0	0	1	Figures: (6) It does not have figures or have figures than not belong to above class_x000D_ Nitrogen Isotherm: No	6	6	TN	TN	TN	TN	TN	TP
10.1021/cg501279y	Supporting Information	6	0	0	0	0	0	1	Figures: (6)_x000D_ Nitrogen Isotherm: No	6	6	TN	TN	TN	TN	TN	TP
10.1021/cg501279y	Supporting Information	7	0	0	0	0	0	1	Figures: (5)_x000D_ Nitrogen Isotherm: Figure S4; Figure S5_x000D_ Compound: 4, 5_x000D_ Porosity: N/A_x000D_ Hysteresis: Yes_x000D_ Saturation: Figure S4: 60 - 80%; Figure S5: 60 - 80%_x000D_ Position: Figure S4: (0, 0, 1, 0.5); Figure S5: (0, 0.5, 1, 1)	6	5	TN	TN	TN	TN	FP	FN
10.1021/cg501279y	Supporting Information	8	0	0	0	0	0	1	Figures: (5)_x000D_ Nitrogen Isotherm: Figure S6; Figure S7_x000D_ Compound: 6; 7_x000D_ Porosity: N/A_x000D_ Hysteresis: Yes_x000D_ Saturation: Figure S6: 60 - 80%; Figure S7: 60 - 80%_x000D_ Position: Figure S6: (0, 0, 0.5, 0.5); Figure S7: (0, 0.5, 0.5, 1)	6	5	TN	TN	TN	TN	FP	FN
10.1021/cg501279y	Supporting Information	9	0	0	0	0	0	1	Figures: (6)_x000D_ Nitrogen Isotherm: No	6	6	TN	TN	TN	TN	TN	TP
10.1021/cg501279y	Supporting Information	10	0	0	1	0	0	0	Figures: (3);(5)_x000D_ Nitrogen Isotherm: Figure S10._x000D_ Compound: 10_x000D_ Porosity: N/A_x000D_ Hysteresis: Yes_x000D_ Saturation: 60 - 70%_x000D_ Position: (0,0,1,0.5)	3	35	TN	TN	TP	TN	FP	TN
10.1021/cg501279y	Supporting Information	11	0	0	1	0	0	0	Figures: (3)_x000D_ Nitrogen Isotherm: No	3	3	TN	TN	TP	TN	TN	TN
10.1021/cg501279y	Supporting Information	12	0	0	1	0	0	0	Figures: (3);(3)_x000D_ Nitrogen Isotherm: No	3	3	TN	TN	TP	TN	TN	TN
10.1021/cg501279y	Supporting Information	13	0	0	1	0	0	0	Figures: (3)_x000D_ Nitrogen Isotherm: No	3	3	TN	TN	TP	TN	TN	TN
10.1021/cg501279y	Supporting Information	14	0	0	1	0	0	0	Figures: (3);(3)_x000D_ Nitrogen Isotherm: No	3	3	TN	TN	TP	TN	TN	TN
10.1021/cg501279y	Supporting Information	15	0	0	1	1	0	0	Figures: (3);(4)_x000D_ Nitrogen Isotherm: No	34	34	TN	TN	TP	TP	TN	TN
10.1021/cg501279y	Supporting Information	16	0	0	0	0	0	1	Figures: (5)_x000D_ Nitrogen Isotherm: Figure S22. (a) Ni(II); (b) Co(II); (c) Mn(II)_x000D_ Compound: Ni(II), Co(II), Mn(II)_x000D_ Porosity: N/A_x000D_ Hysteresis: Yes_x000D_ Saturation: (a) Around 3394.58 cm3/g; (b) Around 3398.65 cm3/g; (c) Around 3331.82 cm3/g_x000D_ Position: (0, 0, 1, 1)	6	5	TN	TN	TN	TN	FP	FN
10.1021/cg501279y	Supporting Information	17	0	1	0	0	0	0	Figures: (2);(6)_x000D_ Nitrogen Isotherm: No	2	26	TN	TP	TN	TN	TN	FP
10.1021/cg501279y	Supporting Information	18	0	0	0	1	0	0	Figures: (4);(5)_x000D_ Nitrogen Isotherm: Figure S25_x000D_ Compound: Ni(II)_x000D_ Porosity: N/A_x000D_ Hysteresis: Yes_x000D_ Saturation: 80 - 90 cm3/g_x000D_ Position: (0, 0, 1, 0.5)	4	45	TN	TN	TN	TP	FP	TN
10.1021/cg501279y	Supporting Information	19	0	0	0	1	0	0	Figures: (4);(6)_x000D_ Nitrogen Isotherm: No	4	46	TN	TN	TN	TP	TN	FP
10.1021/cg501279y	Supporting Information	20	0	0	0	0	0	1	Figures: (6) It does not have figures or have figures that not belong to above class_x000D_ Nitrogen Isotherm: No	6	6	TN	TN	TN	TN	TN	TP
10.1021/cg501279y	Supporting Information	21	0	0	0	0	0	1	Figures: (6) It does not have figures or have figures than not belong to the above class_x000D_ Nitrogen Isotherm: No	6	6	TN	TN	TN	TN	TN	TP
10.1021/cg501279y	Supporting Information	22	0	0	0	1	0	0	Figures: (4);(6)_x000D_ Nitrogen Isotherm: No	4	46	TN	TN	TN	TP	TN	FP
10.1021/cg501279y	Supporting Information	23	0	0	0	1	0	0	Figures: (4)_x000D_ Nitrogen Isotherm: No	4	4	TN	TN	TN	TP	TN	TN
10.1021/cg501279y	Supporting Information	24	0	1	0	0	0	0	Figures: (2)_x000D_ Nitrogen Isotherm: No	2	2	TN	TP	TN	TN	TN	TN
10.1021/cg501279y	Supporting Information	25	0	0	0	0	0	1	Figures: (6) It does not have figures or have figures than not belong to above class_x000D_ Nitrogen Isotherm: No	6	6	TN	TN	TN	TN	TN	TP
10.1021/cg501279y	Supporting Information	26	0	1	0	0	0	0	Figures: (2)_x000D_ Nitrogen Isotherm: No	2	2	TN	TP	TN	TN	TN	TN
10.1021/cg501279y	Supporting Information	27	0	0	0	0	0	1	Figures: (6) It does not have figures or have figures than not belong to above class_x000D_ Nitrogen Isotherm: No	6	6	TN	TN	TN	TN	TN	TP
10.1021/cg501279y	Main	1	0	0	0	0	0	1	Figures: (6) It does not have figures or have figures than not belong to above class_x000D_ Nitrogen Isotherm: No	6	6	TN	TN	TN	TN	TN	TP
10.1021/cg501279y	Main	2	0	0	0	0	0	1	Figures: (6) It does not have figures or have figures than not belong to above class_x000D_ Nitrogen Isotherm: No	6	6	TN	TN	TN	TN	TN	TP
10.1021/cg501279y	Main	3	0	0	0	1	0	0	Figures: (4);(6)_x000D_ Nitrogen Isotherm: No	4	46	TN	TN	TN	TP	TN	FP
10.1021/cg501279y	Main	4	0	0	0	1	0	0	Figures: (4);(6)_x000D_ Nitrogen Isotherm: No	4	46	TN	TN	TN	TP	TN	FP
10.1021/cg501279y	Main	5	0	0	0	1	0	0	Figures: (4);(6)_x000D_ Nitrogen Isotherm: No	4	46	TN	TN	TN	TP	TN	FP
10.1021/cg501279y	Main	6	0	0	0	1	0	0	Figures: (4) Crystal structure or topology illustration_x000D_ Nitrogen Isotherm: No	4	4	TN	TN	TN	TP	TN	TN
10.1021/cg501279y	Main	7	0	0	0	0	0	1	Figures: [Answer: (6) It does not have figures or have figures that not belong to above class]_x000D_ Nitrogen Isotherm: No	6	6	TN	TN	TN	TN	TN	TP
10.1021/cg501332u	Supporting Information	1	0	0	0	0	0	1	The image provided appears to be the title and author information page of an academic paper related to metal-organic frameworks. From what is visible, the page does not contain any figures, graphs, or charts? ?it simply provides the title, authors, affiliations, and contact information for corresponding author of the supporting information for the study._x000D_ _x000D_ Therefore, the appropriate …	6	6	TN	TN	TN	TN	TN	TP
10.1021/cg501332u	Supporting Information	2	0	0	0	1	0	0	Figures: (4)_x000D_ Nitrogen Isotherm: No	4	4	TN	TN	TN	TP	TN	TN
10.1021/cg501332u	Supporting Information	3	0	0	1	0	0	0	Figures: (3)_x000D_ Nitrogen Isotherm: No	3	3	TN	TN	TP	TN	TN	TN
10.1021/cg501332u	Supporting Information	4	0	1	0	0	0	0	Figures: (2) PXRD pattern_x000D_ Nitrogen Isotherm: No	2	2	TN	TP	TN	TN	TN	TN
10.1021/cg501332u	Supporting Information	5	0	1	0	0	1	0	Figures: (2);(5)_x000D_ Nitrogen Isotherm: No	25	25	TN	TP	TN	TN	TP	TN
10.1021/cg501332u	Supporting Information	6	0	0	0	0	1	0	Figures: (5) Other gas sorption isotherm (e.g. water vapor, co2, H2, CH4, etc.)_x000D_ Nitrogen Isotherm: No	5	5	TN	TN	TN	TN	TP	TN
10.1021/cg501332u	Supporting Information	7	0	0	0	0	0	1	Figures: (5)_x000D_ Nitrogen Isotherm: No	6	5	TN	TN	TN	TN	FP	FN
10.1021/cg501332u	Supporting Information	8	0	0	0	0	1	0	Figures: (5) Other gas sorption isotherm (e.g. water vapor, CO2, H2, CH4, etc.)_x000D_ Nitrogen Isotherm: No	5	5	TN	TN	TN	TN	TP	TN
10.1021/cg501332u	Supporting Information	9	0	0	0	0	1	0	Figures: (5)_x000D_ Nitrogen Isotherm: No	5	5	TN	TN	TN	TN	TP	TN
10.1021/cg501332u	Supporting Information	10	0	0	0	0	0	1	Figures: (5)_x000D_ Nitrogen Isotherm: No	6	5	TN	TN	TN	TN	FP	FN
10.1021/cg501332u	Supporting Information	11	0	0	0	0	0	1	Figures: (6) It does not have figures or have figures than not belong to above class_x000D_ Nitrogen Isotherm: No	6	6	TN	TN	TN	TN	TN	TP
10.1021/cg501332u	Main	1	0	0	0	0	0	1	Figures: (6) It does not have figures or have figures than not belong to above class_x000D_ Nitrogen Isotherm: No	6	6	TN	TN	TN	TN	TN	TP
10.1021/cg501332u	Main	2	0	0	0	1	0	0	Figures: (4)_x000D_ Nitrogen Isotherm: No	4	4	TN	TN	TN	TP	TN	TN
10.1021/cg501332u	Main	3	0	0	0	1	0	0	Figures: (4);(6)_x000D_ Nitrogen Isotherm: No	4	46	TN	TN	TN	TP	TN	FP
10.1021/cg501332u	Main	4	1	0	0	0	1	0	Figures: (1);(2);(5)_x000D_ Nitrogen Isotherm: Figure 3. (a) and (b)_x000D_ Compound: 1', 2'_x000D_ Porosity: Emmett???Teller (BET) surface areas of 1 and 2 are similar, which are estimated as 472 m^2??g^???1 for 1 and 488 m^2??g^???1 for 2 from the N2 adsorption isotherms. The H2 sorption capacities of 1 and 2 reach 193 cm^3??g^???1 (0.92 wt %) and 170 cm^3??g^???1 (0.99 wt %), respectively, at …	15	125	TP	FP	TN	TN	TP	TN
10.1021/cg501332u	Main	5	0	0	0	0	0	1	The provided image does not contain a nitrogen isotherm; instead, it contains HPLC graphs for the release of different compounds from a metal-organic framework as described in the article. The graphs are demonstrating the release profile of 1-phenylethanol and 2-phenyl-1-propanol from a solid material over time after the materials were soaked in the compounds' respective solutions._x000D_ _x000D_…	6	6	TN	TN	TN	TN	TN	TP
10.1021/cg501332u	Main	6	0	0	0	0	0	1	Figures: (6) It does not have figures or have figures that do not belong to the above class_x000D_ Nitrogen Isotherm: No	6	6	TN	TN	TN	TN	TN	TP
10.1021/cg501560z	Supporting Information	1	0	0	0	0	0	1	The image you've provided is a title page or supporting information cover page for a scientific article, not an actual page containing figures or data. There are no figures of any kind visible in this image; it only contains the title of the paper, authors, their affiliations, and the header "Supporting Information."_x000D_ _x000D_ Given this information, the response according to your template w…	6	6	TN	TN	TN	TN	TN	TP
10.1021/cg501560z	Supporting Information	2	0	0	0	0	0	1	Figures: [Answer: (6) It does not have figures or have figures than not belong to above class]_x000D_ Nitrogen Isotherm: No	6	6	TN	TN	TN	TN	TN	TP
10.1021/cg501560z	Supporting Information	3	0	0	1	0	0	0	Figures: (3)_x000D_ Nitrogen Isotherm: No_x000D_ Compound: N/A_x000D_ Porosity: N/A_x000D_ Hysteresis: N/A_x000D_ Saturation: N/A_x000D_ Position: N/A	3	3	TN	TN	TP	TN	TN	TN
10.1021/cg501560z	Supporting Information	4	0	0	0	1	0	0	Figures: (4) Crystal structure or topology illustration_x000D_ Nitrogen Isotherm: No	4	4	TN	TN	TN	TP	TN	TN
10.1021/cg501560z	Supporting Information	5	0	0	0	1	0	0	Figures: (4) Crystal structure or topology illustration_x000D_ Nitrogen Isotherm: No	4	4	TN	TN	TN	TP	TN	TN
10.1021/cg501560z	Supporting Information	6	0	0	0	1	0	0	Figures: (4);(6)_x000D_ Nitrogen Isotherm: No	4	46	TN	TN	TN	TP	TN	FP
10.1021/cg501560z	Supporting Information	7	0	0	0	1	0	0	Figures: (4)_x000D_ Nitrogen Isotherm: No	4	4	TN	TN	TN	TP	TN	TN
10.1021/cg501560z	Supporting Information	8	0	0	0	0	0	1	Figures: (6) It does not have figures or have figures than not belong to above class_x000D_ Nitrogen Isotherm: No	6	6	TN	TN	TN	TN	TN	TP
10.1021/cg501560z	Supporting Information	9	0	0	0	0	0	1	Figures: (6) It does not have figures or have figures than not belong to above class_x000D_ Nitrogen Isotherm: No	6	6	TN	TN	TN	TN	TN	TP
10.1021/cg501560z	Supporting Information	10	0	0	0	0	0	1	Figures: (6) It does not have figures or have figures than not belong to above class_x000D_ Nitrogen Isotherm: No	6	6	TN	TN	TN	TN	TN	TP
10.1021/cg501560z	Supporting Information	11	0	0	0	0	0	1	Figures: (6) It does not have figures or have figures than not belong to above class_x000D_ Nitrogen Isotherm: No	6	6	TN	TN	TN	TN	TN	TP
10.1021/cg501560z	Main	1	0	0	0	1	0	0	Figures: (4);(5)_x000D_ Nitrogen Isotherm: No	4	45	TN	TN	TN	TP	FP	TN
10.1021/cg501560z	Main	2	0	0	0	0	0	1	Figures: (4);(6)_x000D_ Nitrogen Isotherm: No	6	46	TN	TN	TN	FP	TN	FN
10.1021/cg501560z	Main	3	0	0	0	1	0	0	Figures: (4) Crystal structure or topology illustration_x000D_ Nitrogen Isotherm: No	4	4	TN	TN	TN	TP	TN	TN
10.1021/cg501560z	Main	4	0	0	0	1	0	0	Figures: (4);(6)_x000D_ Nitrogen Isotherm: No	4	46	TN	TN	TN	TP	TN	FP
10.1021/cg501560z	Main	5	0	0	0	1	0	0	Figures: (4) Crystal structure or topology illustration_x000D_ Nitrogen Isotherm: No	4	4	TN	TN	TN	TP	TN	TN
10.1021/cg501560z	Main	6	0	0	0	0	0	1	Figures: (6) It does not have figures or have figures than not belong to above class_x000D_ Nitrogen Isotherm: No	6	6	TN	TN	TN	TN	TN	TP
10.1021/cg501560z	Main	7	0	0	0	0	0	1	Figures: (6) It does not have figures or have figures than not belong to the above class_x000D_ Nitrogen Isotherm: No	6	6	TN	TN	TN	TN	TN	TP
10.1021/cg501560z	Main	8	0	0	0	0	0	1	Figures: [Answer: (6) It does not have figures or have figures than not belong to above class]_x000D_ Nitrogen Isotherm: No	6	6	TN	TN	TN	TN	TN	TP
10.1021/cg501730q	Supporting Information	1	0	0	0	0	0	1	Figures: (6) It does not have figures or have figures than not belong to above class_x000D_ Nitrogen Isotherm: No	6	6	TN	TN	TN	TN	TN	TP
10.1021/cg501730q	Supporting Information	2	0	1	0	1	0	0	Figures: (2);(4)_x000D_ Nitrogen Isotherm: No	24	24	TN	TP	TN	TP	TN	TN
10.1021/cg501730q	Supporting Information	3	0	0	0	1	0	0	Figures: (4)_x000D_ Nitrogen Isotherm: No	4	4	TN	TN	TN	TP	TN	TN
10.1021/cg501730q	Supporting Information	4	0	0	1	1	0	0	Figures: (3);(4)_x000D_ Nitrogen Isotherm: No	34	34	TN	TN	TP	TP	TN	TN
10.1021/cg501730q	Supporting Information	5	0	0	0	0	0	1	Figures: (6) It does not have figures or have figures than not belong to the above class_x000D_ Nitrogen Isotherm: No	6	6	TN	TN	TN	TN	TN	TP
10.1021/cg501730q	Supporting Information	6	0	1	0	0	0	0	Figures: (2);(6)_x000D_ Nitrogen Isotherm: No	2	26	TN	TP	TN	TN	TN	FP
10.1021/cg501730q	Supporting Information	7	0	0	0	0	0	1	Figures: (6) It does not have figures or have figures than not belong to above class_x000D_ Nitrogen Isotherm: No	6	6	TN	TN	TN	TN	TN	TP
10.1021/cg501730q	Supporting Information	8	0	0	0	0	0	1	Figures: (6) It does not have figures or have figures than not belong to above class_x000D_ Nitrogen Isotherm: No	6	6	TN	TN	TN	TN	TN	TP
10.1021/cg501730q	Supporting Information	9	0	0	0	0	0	1	Figures: (6) It does not have figures or have figures than not belong to above class_x000D_ Nitrogen Isotherm: No	6	6	TN	TN	TN	TN	TN	TP
10.1021/cg501730q	Main	1	0	0	0	0	0	1	Figures: (6) It does not have figures or have figures than not belong to above class_x000D_ Nitrogen Isotherm: No	6	6	TN	TN	TN	TN	TN	TP
10.1021/cg501730q	Main	2	0	0	0	0	0	1	Figures: (6) It does not have figures or have figures than not belong to above class_x000D_ Nitrogen Isotherm: No	6	6	TN	TN	TN	TN	TN	TP
10.1021/cg501730q	Main	3	0	0	0	1	0	0	Figures: (4) Crystal structure or topology illustration_x000D_ Nitrogen Isotherm: No	4	4	TN	TN	TN	TP	TN	TN
10.1021/cg501730q	Main	4	0	0	0	1	0	0	Figures: (2);(4)_x000D_ Nitrogen Isotherm: No	4	24	TN	FP	TN	TP	TN	TN
10.1021/cg501730q	Main	5	0	0	0	0	0	1	Figures: (6) It does not have figures or have figures than not belong to above class_x000D_ Nitrogen Isotherm: No	6	6	TN	TN	TN	TN	TN	TP
10.1021/cg501730q	Main	6	0	0	0	0	0	1	Figures: [Answer: (6) It does not have figures or have figures than not belong to above class]_x000D_ Nitrogen Isotherm: No	6	6	TN	TN	TN	TN	TN	TP
10.1021/cg800424t	Main	1	0	0	0	0	0	1	Figures: [Answer: (6)]_x000D_ Nitrogen Isotherm: No	6	6	TN	TN	TN	TN	TN	TP
10.1021/cg800424t	Main	2	0	0	0	1	0	0	Figures: (4) Crystal structure or topology illustration_x000D_ Nitrogen Isotherm: No	4	4	TN	TN	TN	TP	TN	TN
10.1021/cg800424t	Main	3	0	0	0	1	0	0	Figures: (4);(5)_x000D_ Nitrogen Isotherm: Figure 5_x000D_ Compound: N/A_x000D_ Porosity: N/A_x000D_ Hysteresis: Yes_x000D_ Saturation: I do not know_x000D_ Position: (0.45, 0.5, 1, 0.85)	4	45	TN	TN	TN	TP	FP	TN
10.1021/cg800424t	Main	4	0	0	0	0	0	1	Figures: (6) It does not have figures or have figures than not belong to above class_x000D_ Nitrogen Isotherm: No	6	6	TN	TN	TN	TN	TN	TP
10.1021/cg801267m	Supporting Information	1	0	0	0	0	0	1	The image provided is of a title page from a scientific paper and does not contain any figures or graphs. It is simply the title and author information page, along with affiliations._x000D_ _x000D_ Therefore, based on the image provided and the instructions for the template, the answers are as follows:_x000D_ _x000D_ Figures: [Answer: (6) It does not have figures or have figures that do not belon…	6	6	TN	TN	TN	TN	TN	TP
10.1021/cg801267m	Supporting Information	2	0	1	0	0	0	0	Figures: (2)_x000D_ Nitrogen Isotherm: No	2	2	TN	TP	TN	TN	TN	TN
10.1021/cg801267m	Supporting Information	3	0	1	0	0	0	0	Figures: (2)_x000D_ Nitrogen Isotherm: No	2	2	TN	TP	TN	TN	TN	TN
10.1021/cg801267m	Supporting Information	4	0	1	0	0	0	0	Figures: (2)_x000D_ Nitrogen Isotherm: No	2	2	TN	TP	TN	TN	TN	TN
10.1021/cg801267m	Supporting Information	5	0	1	0	0	0	0	Figures: (2)_x000D_ Nitrogen Isotherm: No	2	2	TN	TP	TN	TN	TN	TN
10.1021/cg801267m	Supporting Information	6	0	1	0	0	0	0	Figures: (2) PXRD pattern_x000D_ Nitrogen Isotherm: No	2	2	TN	TP	TN	TN	TN	TN
10.1021/cg801267m	Supporting Information	7	0	1	0	0	0	0	Figures: (2) PXRD pattern_x000D_ Nitrogen Isotherm: No	2	2	TN	TP	TN	TN	TN	TN
10.1021/cg801267m	Supporting Information	8	0	1	0	0	0	0	Figures: (2)_x000D_ Nitrogen Isotherm: No	2	2	TN	TP	TN	TN	TN	TN
10.1021/cg801267m	Main	1	0	0	0	0	0	1	Figures: (6) It does not have figures or have figures than not belong to above class_x000D_ Nitrogen Isotherm: No	6	6	TN	TN	TN	TN	TN	TP
10.1021/cg801267m	Main	2	0	0	0	1	0	0	Figures: (4)_x000D_ Nitrogen Isotherm: No	4	4	TN	TN	TN	TP	TN	TN
10.1021/cg801267m	Main	3	0	0	0	1	0	0	Figures: (4)_x000D_ Nitrogen Isotherm: No	4	4	TN	TN	TN	TP	TN	TN
10.1021/cg801267m	Main	4	0	0	0	1	0	0	Figures: (4) Crystal structure or topology illustration_x000D_ Nitrogen Isotherm: No	4	4	TN	TN	TN	TP	TN	TN
10.1021/cg801267m	Main	5	0	0	0	0	0	1	Figures: (6) It does not have figures or have figures than not belong to the above class_x000D_ Nitrogen Isotherm: No	6	6	TN	TN	TN	TN	TN	TP
10.1021/cg801267m	Main	6	0	0	0	0	0	1	Figures: (6) It does not have figures or have figures than not belong to above class_x000D_ Nitrogen Isotherm: No	6	6	TN	TN	TN	TN	TN	TP
10.1021/cg8013317	Supporting Information	1	0	0	0	0	0	1	Figures: [Answer: (6) It does not have figures or have figures than not belong to the above class]_x000D_ Nitrogen Isotherm: No	6	6	TN	TN	TN	TN	TN	TP
10.1021/cg8013317	Supporting Information	2	0	0	0	0	0	1	Figures: (6) It does not have figures or have figures than not belong to above class_x000D_ Nitrogen Isotherm: No	6	6	TN	TN	TN	TN	TN	TP
10.1021/cg8013317	Supporting Information	3	0	0	0	0	0	1	Figures: (6) It does not have figures or have figures that do not belong to the above class_x000D_ Nitrogen Isotherm: No	6	6	TN	TN	TN	TN	TN	TP
10.1021/cg8013317	Supporting Information	4	0	0	0	0	0	1	Figures: (6) It does not have figures or have figures than not belong to above class_x000D_ Nitrogen Isotherm: No	6	6	TN	TN	TN	TN	TN	TP
10.1021/cg8013317	Supporting Information	5	0	0	0	1	0	0	Figures: (4) Crystal structure or topology illustration_x000D_ Nitrogen Isotherm: No	4	4	TN	TN	TN	TP	TN	TN
10.1021/cg8013317	Supporting Information	6	0	0	1	0	0	0	Figures: (3)_x000D_ Nitrogen Isotherm: No	3	3	TN	TN	TP	TN	TN	TN
10.1021/cg8013317	Supporting Information	7	0	0	1	0	0	0	Figures: (3);(3)_x000D_ Nitrogen Isotherm: (3) for 5; (4) for 6_x000D_ Compound: N/A_x000D_ Porosity: N/A_x000D_ Hysteresis: Yes_x000D_ Saturation: (3) for 5: 90-100%; (4) for 6: 90-100%_x000D_ Position: (0, 0, 0.5, 0.6); (0.5, 0, 1, 0.6)	3	3	TN	TN	TP	TN	TN	TN
10.1021/cg8013317	Supporting Information	8	0	0	0	1	0	0	Figures: (4) Crystal structure or topology illustration_x000D_ Nitrogen Isotherm: No	4	4	TN	TN	TN	TP	TN	TN
10.1021/cg8013317	Supporting Information	9	0	0	0	1	0	0	Figures: (4) Crystal structure or topology illustration_x000D_ Nitrogen Isotherm: No	4	4	TN	TN	TN	TP	TN	TN
10.1021/cg8013317	Supporting Information	10	0	0	0	1	0	0	Figures: (4) Crystal structure or topology illustration_x000D_ Nitrogen Isotherm: No	4	4	TN	TN	TN	TP	TN	TN
10.1021/cg8013317	Supporting Information	11	0	0	0	1	0	0	Figures: (4) Crystal structure or topology illustration_x000D_ Nitrogen Isotherm: No	4	4	TN	TN	TN	TP	TN	TN
10.1021/cg8013317	Supporting Information	12	0	0	0	1	0	0	Figures: (4) Crystal structure or topology illustration_x000D_ Nitrogen Isotherm: No	4	4	TN	TN	TN	TP	TN	TN
10.1021/cg8013317	Main	1	0	0	0	0	0	1	Figures: (6) It does not have figures or have figures than not belong to above class_x000D_ Nitrogen Isotherm: No	6	6	TN	TN	TN	TN	TN	TP
10.1021/cg8013317	Main	2	0	0	0	0	0	1	Figures: (6) It does not have figures or have figures than not belong to above class_x000D_ Nitrogen Isotherm: No	6	6	TN	TN	TN	TN	TN	TP
10.1021/cg8013317	Main	3	0	0	0	1	0	0	Figures: (4)_x000D_ Nitrogen Isotherm: No	4	4	TN	TN	TN	TP	TN	TN
10.1021/cg8013317	Main	4	0	0	0	1	0	0	Figures: (4)_x000D_ Nitrogen Isotherm: No	4	4	TN	TN	TN	TP	TN	TN
10.1021/cg8013317	Main	5	0	0	0	1	0	0	Figures: (4)_x000D_ Nitrogen Isotherm: No	4	4	TN	TN	TN	TP	TN	TN
10.1021/cg8013317	Main	6	0	0	0	1	0	0	Figures: (4)_x000D_ Nitrogen Isotherm: No	4	4	TN	TN	TN	TP	TN	TN
10.1021/cg8013317	Main	7	0	0	0	0	0	1	Figures: (6) It does not have figures or have figures than not belong to above class_x000D_ Nitrogen Isotherm: No	6	6	TN	TN	TN	TN	TN	TP
10.1021/cg8013317	Main	8	0	0	0	0	0	1	Figures: [Answer: (6) It does not have figures or have figures than not belong to above class]_x000D_ Nitrogen Isotherm: No	6	6	TN	TN	TN	TN	TN	TP
10.1021/cg8013317	Main	9	0	0	0	0	0	1	Figures: (6) It does not have figures or have figures than not belong to above class_x000D_ Nitrogen Isotherm: No	6	6	TN	TN	TN	TN	TN	TP
10.1021/cg900153m	Supporting Information	1	0	0	0	0	0	1	Figures: [Answer: (6) It does not have figures or have figures than not belong to above class]_x000D_ Nitrogen Isotherm: No	6	6	TN	TN	TN	TN	TN	TP
10.1021/cg900153m	Supporting Information	2	0	0	0	0	0	1	Figures: (6) It does not have figures or have figures than not belong to above class_x000D_ Nitrogen Isotherm: No	6	6	TN	TN	TN	TN	TN	TP
10.1021/cg900153m	Supporting Information	3	0	0	0	0	0	1	Figures: (6) It does not have figures or have figures than not belong to above class_x000D_ Nitrogen Isotherm: No	6	6	TN	TN	TN	TN	TN	TP
10.1021/cg900153m	Supporting Information	4	0	0	0	1	0	0	Figures: (4)_x000D_ Nitrogen Isotherm: No	4	4	TN	TN	TN	TP	TN	TN
10.1021/cg900153m	Supporting Information	5	0	0	0	0	0	1	Figures: (6) It does not have figures or have figures than not belong to above class_x000D_ Nitrogen Isotherm: No	6	6	TN	TN	TN	TN	TN	TP
10.1021/cg900153m	Main	1	0	0	0	1	0	0	Figures: (4)_x000D_ Nitrogen Isotherm: No	4	4	TN	TN	TN	TP	TN	TN
10.1021/cg900153m	Main	2	0	0	0	1	0	0	Figures: (4) Crystal structure or topology illustration_x000D_ Nitrogen Isotherm: No	4	4	TN	TN	TN	TP	TN	TN
10.1021/cg900153m	Main	3	0	0	0	0	0	1	Figures: (6) It does not have figures or have figures that not belong to the above class Nitrogen Isotherm: No	6	6	TN	TN	TN	TN	TN	TP
10.1021/cg901114e	Supporting Information	1	0	0	0	0	0	1	Figures: (3);(4) Nitrogen Isotherm: No	6	34	TN	TN	FP	FP	TN	FN
10.1021/cg901114e	Supporting Information	2	0	0	0	0	0	1	Figures: [Answer: (6) It does not have figures or have figures than not belong to above class] Nitrogen Isotherm: No	6	6	TN	TN	TN	TN	TN	TP
10.1021/cg901114e	Supporting Information	3	0	0	0	0	0	1	Figures: (6) It does not have figures or have figures than not belong to above class Nitrogen Isotherm: No	6	6	TN	TN	TN	TN	TN	TP
10.1021/cg901114e	Supporting Information	4	0	0	0	0	0	1	Figures: [Answer: (6) It does not have figures or have figures than not belong to above class] Nitrogen Isotherm: No	6	6	TN	TN	TN	TN	TN	TP
10.1021/cg901114e	Supporting Information	5	0	0	0	1	0	0	Figures: (4) Nitrogen Isotherm: No	4	4	TN	TN	TN	TP	TN	TN
10.1021/cg901114e	Supporting Information	6	0	0	0	1	0	0	Figures: (4) Crystal structure or topology illustration Nitrogen Isotherm: No	4	4	TN	TN	TN	TP	TN	TN
10.1021/cg901114e	Supporting Information	7	0	0	1	0	0	0	Figures: (3) Nitrogen Isotherm: No	3	3	TN	TN	TP	TN	TN	TN
10.1021/cg901114e	Main	1	0	0	0	0	0	1	Figures: (6) It does not have figures or have figures than not belong to above class_x000D_ Nitrogen Isotherm: No	6	6	TN	TN	TN	TN	TN	TP
10.1021/cg901114e	Main	2	0	0	0	1	0	0	Figures: (4) Crystal structure or topology illustration_x000D_ Nitrogen Isotherm: No	4	4	TN	TN	TN	TP	TN	TN
10.1021/cg901114e	Main	3	0	0	0	1	0	0	Figures: (4);(6)_x000D_ Nitrogen Isotherm: No	4	46	TN	TN	TN	TP	TN	FP
10.1021/cg901114e	Main	4	0	0	0	0	0	1	Figures: (6) It does not have figures or have figures than not belong to the above class_x000D_ Nitrogen Isotherm: No	6	6	TN	TN	TN	TN	TN	TP
10.1021/cg901128k	Supporting Information	1	0	0	0	0	0	1	Figures: (6) It does not have figures or have figures than not belong to above class Nitrogen Isotherm: No	6	6	TN	TN	TN	TN	TN	TP
10.1021/cg901128k	Supporting Information	2	0	0	0	0	0	1	Figures: (5) Other gas adsorption isotherm (e.g. water vapor, co2, H2, CH4, etc.) Nitrogen Isotherm: No	6	5	TN	TN	TN	TN	FP	FN
10.1021/cg901128k	Supporting Information	3	0	0	0	0	0	1	Figures: (6) It does not have figures or have figures than not belong to above class Nitrogen Isotherm: No	6	6	TN	TN	TN	TN	TN	TP
10.1021/cg901128k	Main	1	0	0	0	0	0	1	Figures: (6) It does not have figures or have figures than not belong to above class_x000D_ Nitrogen Isotherm: No	6	6	TN	TN	TN	TN	TN	TP
10.1021/cg901128k	Main	2	0	0	0	0	0	1	Figures: (6) It does not have figures or have figures than not belong to the above class_x000D_ Nitrogen Isotherm: No	6	6	TN	TN	TN	TN	TN	TP
10.1021/cg901128k	Main	3	0	0	0	1	0	0	Figures: (4)_x000D_ Nitrogen Isotherm: No	4	4	TN	TN	TN	TP	TN	TN
10.1021/cg901128k	Main	4	0	0	0	1	0	0	Figures: (4) Crystal structure or topology illustration_x000D_ Nitrogen Isotherm: No	4	4	TN	TN	TN	TP	TN	TN
10.1021/cg901128k	Main	5	0	0	1	1	0	0	Figures: (3);(4)_x000D_ Nitrogen Isotherm: Figure 4_x000D_ Compound: 1, 2, 3_x000D_ Porosity: N/A_x000D_ Hysteresis: I do not know_x000D_ Saturation: 100-80%_x000D_ Position: (0.5, 0.45, 1, 0.75)	34	34	TN	TN	TP	TP	TN	TN
10.1021/cg901128k	Main	6	1	1	0	0	1	0	Figures: (1);(2);(5)_x000D_ Nitrogen Isotherm: Figure 7(a)_x000D_ Compound: N2 ads at 77K, N2 des at 77K_x000D_ Porosity: N/A_x000D_ Hysteresis: Yes_x000D_ Saturation: 0.2 - 0.4 cm^3/g_x000D_ Position: (0.05,0.45,0.5,0.9)	125	125	TP	TP	TN	TN	TP	TN
10.1021/cg901128k	Main	7	0	0	0	0	0	1	Figures: (6) It does not have figures or have figures that do not belong to the above class._x000D_ Nitrogen Isotherm: No.	6	6	TN	TN	TN	TN	TN	TP
10.1021/cg901128k	Main	8	0	0	0	0	0	1	Figures: (6) It does not have figures or have figures than not belong to above class_x000D_ Nitrogen Isotherm: No	6	6	TN	TN	TN	TN	TN	TP
10.1021/cg901312t	Supporting Information	1	0	0	0	0	0	1	Figures: [Answer: (6) It does not have figures or have figures that not belong to above class] Nitrogen Isotherm: No	6	6	TN	TN	TN	TN	TN	TP
10.1021/cg901312t	Supporting Information	2	0	0	0	0	0	1	Figures: (6) It does not have figures or have figures than not belong to above class Nitrogen Isotherm: No	6	6	TN	TN	TN	TN	TN	TP
10.1021/cg901312t	Supporting Information	3	0	0	0	1	0	0	Figures: (4) Nitrogen Isotherm: No	4	4	TN	TN	TN	TP	TN	TN
10.1021/cg901312t	Supporting Information	4	0	0	0	1	0	0	Figures: (4) Crystal structure or topology illustration Nitrogen Isotherm: No	4	4	TN	TN	TN	TP	TN	TN
10.1021/cg901312t	Supporting Information	5	0	1	0	1	0	0	Figures: (2);(4) Nitrogen Isotherm: No	24	24	TN	TP	TN	TP	TN	TN
10.1021/cg901312t	Supporting Information	6	0	0	1	0	0	0	Figures: (3) Nitrogen Isotherm: No	3	3	TN	TN	TP	TN	TN	TN
10.1021/cg901312t	Main	1	0	0	0	0	0	1	Figures: (6) It does not have figures or have figures than not belong to above class_x000D_ Nitrogen Isotherm: No	6	6	TN	TN	TN	TN	TN	TP
10.1021/cg901312t	Main	2	0	0	0	1	0	0	Figures: (4);(5)_x000D_ Nitrogen Isotherm: No	4	45	TN	TN	TN	TP	FP	TN
10.1021/cg901312t	Main	3	1	0	0	1	0	0	Figures: (1);(4)_x000D_ Nitrogen Isotherm: Figure 4_x000D_ Compound: N/A_x000D_ Porosity: N/A_x000D_ Saturation: 100-105 cm^3/g_x000D_ Position: (0,0.25,0.5,0.75)	14	14	TP	TN	TN	TP	TN	TN
10.1021/cg901312t	Main	4	0	0	0	0	0	1	Figures: (6) It does not have figures or have figures than not belong to above class_x000D_ Nitrogen Isotherm: No	6	6	TN	TN	TN	TN	TN	TP
10.1021/cm071462f	Supporting Information	1	0	0	0	0	0	1	Figures: (6) It does not have figures or have figures than not belong to above class Nitrogen Isotherm: No	6	6	TN	TN	TN	TN	TN	TP
10.1021/cm071462f	Supporting Information	2	0	0	0	0	0	1	Figures: (6) It does not have figures or have figures than not belong to above class Nitrogen Isotherm: No	6	6	TN	TN	TN	TN	TN	TP
10.1021/cm071462f	Supporting Information	3	0	0	0	0	0	1	Figures: (6) It does not have figures or have figures than not belong to above class Nitrogen Isotherm: No	6	6	TN	TN	TN	TN	TN	TP
10.1021/cm071462f	Supporting Information	4	0	0	0	0	0	1	Figures: (6) It does not have figures or have figures than not belong to above class Nitrogen Isotherm: No	6	6	TN	TN	TN	TN	TN	TP
10.1021/cm071462f	Supporting Information	5	0	0	0	0	0	1	Figures: (6) It does not have figures or have figures than not belong to above class Nitrogen Isotherm: No	6	6	TN	TN	TN	TN	TN	TP
10.1021/cm071462f	Supporting Information	6	0	0	0	0	0	1	Figures: [Answer: (6) It does not have figures or have figures than not belong to above class] Nitrogen Isotherm: No	6	6	TN	TN	TN	TN	TN	TP
10.1021/cm071462f	Supporting Information	7	0	0	0	0	0	1	Figures: (6) It does not have figures or have figures than not belong to above class Nitrogen Isotherm: No	6	6	TN	TN	TN	TN	TN	TP
10.1021/cm071462f	Supporting Information	8	0	0	0	0	0	1	Figures: [Answer: (6) It does not have figures or have figures than not belong to above class] Nitrogen Isotherm: No	6	6	TN	TN	TN	TN	TN	TP
10.1021/cm071462f	Supporting Information	9	0	0	0	0	0	1	Figures: (6) It does not have figures or have figures than not belong to above class Nitrogen Isotherm: No	6	6	TN	TN	TN	TN	TN	TP
10.1021/cm071462f	Supporting Information	10	0	0	0	0	0	1	Figures: (6) It does not have figures or have figures than not belong to above class_x000D_ Nitrogen Isotherm: No	6	6	TN	TN	TN	TN	TN	TP
10.1021/cm071462f	Supporting Information	11	0	1	0	0	0	0	Figures: (2) PXRD pattern Nitrogen Isotherm: No	2	2	TN	TP	TN	TN	TN	TN
10.1021/cm071462f	Supporting Information	12	0	1	0	0	0	0	Figures: (2) Nitrogen Isotherm: No	2	2	TN	TP	TN	TN	TN	TN
10.1021/cm071462f	Supporting Information	13	0	1	0	0	0	0	Figures: (2) Nitrogen Isotherm: No	2	2	TN	TP	TN	TN	TN	TN
10.1021/cm071462f	Supporting Information	14	0	0	0	0	0	1	Figures: (6) It does not have figures or have figures than not belong to above class Nitrogen Isotherm: No	6	6	TN	TN	TN	TN	TN	TP
10.1021/cm071462f	Supporting Information	15	0	0	0	0	0	1	Figures: (6) It does not have figures or have figures than not belong to above class Nitrogen Isotherm: No	6	6	TN	TN	TN	TN	TN	TP
10.1021/cm071462f	Supporting Information	16	0	0	0	0	0	1	Figures: (6) It does not have figures or have figures than not belong to above class Nitrogen Isotherm: No	6	6	TN	TN	TN	TN	TN	TP
10.1021/cm071462f	Supporting Information	17	0	0	0	0	0	1	Figures: (6) It does not have figures or have figures than not belong to above class Nitrogen Isotherm: No	6	6	TN	TN	TN	TN	TN	TP
10.1021/cm071462f	Supporting Information	18	0	0	0	0	0	1	Figures: (6) It does not have figures or have figures that do not belong to the above class_x000D_ Nitrogen Isotherm: No	6	6	TN	TN	TN	TN	TN	TP
10.1021/cm071462f	Supporting Information	19	0	0	0	0	0	1	Figures: (6) It does not have figures or have figures than not belong to above class_x000D_ Nitrogen Isotherm: No	6	6	TN	TN	TN	TN	TN	TP
10.1021/cm071462f	Supporting Information	20	0	1	0	0	0	0	Figures: (2)_x000D_ Nitrogen Isotherm: No	2	2	TN	TP	TN	TN	TN	TN
10.1021/cm071462f	Supporting Information	21	0	0	1	0	0	0	Figures: (3)_x000D_ Nitrogen Isotherm: Figure S11_x000D_ Compound: 1, 4, 5_x000D_ Porosity: N/A_x000D_ Hysteresis: Yes_x000D_ Saturation: 95-100% (for compound 1 and 4), 85-90% (for compound 5)_x000D_ Position: (0, 0, 1, 1)	3	3	TN	TN	TP	TN	TN	TN
10.1021/cm071462f	Main	1	0	0	0	0	0	1	Figures: [Answer: (6) It does not have figures or have figures than not belong to above class]_x000D_ Nitrogen Isotherm: No	6	6	TN	TN	TN	TN	TN	TP
10.1021/cm071462f	Main	2	0	0	0	0	0	1	Figures: (6) It does not have figures or have figures than not belong to above class_x000D_ Nitrogen Isotherm: No	6	6	TN	TN	TN	TN	TN	TP
10.1021/cm071462f	Main	3	0	0	0	1	0	0	Figures: [Answer: (4)]_x000D_ Nitrogen Isotherm: No	4	4	TN	TN	TN	TP	TN	TN
10.1021/cm071462f	Main	4	0	0	0	1	0	0	Figures: (4)_x000D_ Nitrogen Isotherm: No	4	4	TN	TN	TN	TP	TN	TN
10.1021/cm071462f	Main	5	0	0	0	0	0	1	Figures: (6) It does not have figures or have figures than not belong to above class_x000D_ Nitrogen Isotherm: No	6	6	TN	TN	TN	TN	TN	TP
10.1021/cm071462f	Main	6	0	0	0	0	0	1	Figures: (4);(6)_x000D_ Nitrogen Isotherm: No	6	46	TN	TN	TN	FP	TN	FN
10.1021/cm1008587	Supporting Information	1	0	0	1	0	0	0	Figures: (3);(5)_x000D_ Nitrogen Isotherm: No_x000D_	3	35	TN	TN	TP	TN	FP	TN
10.1021/cm1008587	Supporting Information	2	0	0	1	0	0	0	Figures: (3)_x000D_ Nitrogen Isotherm: No	3	3	TN	TN	TP	TN	TN	TN
10.1021/cm1008587	Supporting Information	3	0	1	1	0	0	0	Figures: (2);(3)_x000D_ Nitrogen Isotherm: No	23	23	TN	TP	TP	TN	TN	TN
10.1021/cm1008587	Supporting Information	4	0	1	0	0	0	0	Figures: (2);(5)_x000D_ Nitrogen Isotherm: Figure S3.3_x000D_ Compound: MIL-53(Fe)[lutidine, H2O]_x000D_ Porosity: N/A_x000D_ Hysteresis: Yes_x000D_ Saturation: I do not know_x000D_ Position: (0, 0.4, 1, 1)	2	25	TN	TP	TN	TN	FP	TN
10.1021/cm1008587	Main	1	0	0	0	0	0	1	Figures: (6) It does not have figures or have figures that not belong to the above class._x000D_ Nitrogen Isotherm: No	6	6	TN	TN	TN	TN	TN	TP
10.1021/cm1008587	Main	2	0	1	0	1	0	0	Figures: [Answer: (2);(5)]_x000D_ Nitrogen Isotherm: No	24	25	TN	TP	TN	FN	FP	TN
10.1021/cm1008587	Main	3	0	1	0	1	0	0	Figures: (2);(4)_x000D_ Nitrogen Isotherm: No	24	24	TN	TP	TN	TP	TN	TN
10.1021/cm1008587	Main	4	0	1	1	0	0	0	Figures: (2);(3)_x000D_ Nitrogen Isotherm: Figure 4 (top)_x000D_ Compound: MIL-53(Fe)[lutidine.H???O]_x000D_ Porosity: N/A_x000D_ Hysteresis: Yes_x000D_ Saturation: 90 - 100 cm??/g_x000D_ Position: (0, 0, 0.5, 0.5)	23	23	TN	TP	TP	TN	TN	TN
10.1021/cm1008587	Main	5	0	1	0	1	0	0	Figures: (4);(2)_x000D_ Nitrogen Isotherm: Figure 5_x000D_ Compound: MIL-53(Fe)[lutidine], MIL-53(Fe)H2O_x000D_ Porosity: N/A_x000D_ Hysteresis: Yes_x000D_ Saturation: 300 - 400 cm^3/g_x000D_ Position: (0.05,0.4,0.5,0.7)	24	24	TN	TP	TN	TP	TN	TN
10.1021/cm1008587	Main	6	0	0	0	0	0	1	Figures: (2);(5)_x000D_ Nitrogen Isotherm: Figure 6 a,b_x000D_ Compound: MIL-53(Fe)[H2O], MIL-53(Fe)[pyridine], MIL-53Fe[pyridine,H2O]_x000D_ Porosity: N/A_x000D_ Hysteresis: I do not know_x000D_ Saturation: I do not know_x000D_ Position: (0.1, 0.1, 0.5, 0.7)	6	25	TN	FP	TN	TN	FP	FN
10.1021/cm1008587	Main	7	0	0	0	0	0	1	Figures: [Answer: (4);(5)]_x000D_ Nitrogen Isotherm: No	6	45	TN	TN	TN	FP	FP	FN
10.1021/cm1008587	Main	8	0	0	0	0	0	1	Figures: (2);(5)_x000D_ Nitrogen Isotherm: No	6	25	TN	FP	TN	TN	FP	FN
10.1021/cm1008587	Main	9	0	0	0	0	0	1	Figures: (6) It does not have figures or have figures than not belong to above class_x000D_ Nitrogen Isotherm: No	6	6	TN	TN	TN	TN	TN	TP
10.1021/cm202876r	Supporting Information	1	0	1	0	1	0	0	Figures: (2);(4)_x000D_ Nitrogen Isotherm: No	24	24	TN	TP	TN	TP	TN	TN
10.1021/cm202876r	Supporting Information	2	0	1	0	0	0	0	Figures: (2)_x000D_ Nitrogen Isotherm: No	2	2	TN	TP	TN	TN	TN	TN
10.1021/cm202876r	Supporting Information	3	0	0	0	0	0	1	Figures: (6) It does not have figures or have figures that do not belong to the above class._x000D_ Nitrogen Isotherm: No.	6	6	TN	TN	TN	TN	TN	TP
10.1021/cm202876r	Supporting Information	4	0	0	0	0	0	1	Figures: (6) It does not have figures or have figures than not belong to above class_x000D_ Nitrogen Isotherm: No	6	6	TN	TN	TN	TN	TN	TP
10.1021/cm202876r	Supporting Information	5	0	0	1	0	0	0	Figures: (3);(5)_x000D_ Nitrogen Isotherm: No	3	35	TN	TN	TP	TN	FP	TN
10.1021/cm202876r	Supporting Information	6	0	0	0	0	0	1	Figures: (4);(6)_x000D_ Nitrogen Isotherm: No	6	46	TN	TN	TN	FP	TN	FN
10.1021/cm202876r	Supporting Information	7	0	0	0	0	0	1	Figures: (6) It does not have figures or have figures than not belong to above class_x000D_ Nitrogen Isotherm: No	6	6	TN	TN	TN	TN	TN	TP
10.1021/cm202876r	Supporting Information	8	0	0	0	0	0	1	Figures: [Answer: (6) It does not have figures or have figures than not belong to above class]_x000D_ Nitrogen Isotherm: No	6	6	TN	TN	TN	TN	TN	TP
10.1021/cm202876r	Main	1	0	0	0	0	0	1	Figures: (2);(3);(5)_x000D_ Nitrogen Isotherm: Figure 1a_x000D_ Compound: Compounds 2, 3, 4_x000D_ Porosity: N/A_x000D_ Hysteresis: Yes_x000D_ Saturation: 250 - 350 cm3/g_x000D_ Position: (0.4,0.55,0.85,0.75)	6	235	TN	FP	FP	TN	FP	FN
10.1021/cm202876r	Main	2	0	0	0	0	0	1	Figures: (6) It does not have figures or have figures than not belong to above class_x000D_ Nitrogen Isotherm: No	6	6	TN	TN	TN	TN	TN	TP
10.1021/cm202876r	Main	3	0	0	0	0	0	1	Figures: (6) It does not have figures or have figures than not belong to above class_x000D_ Nitrogen Isotherm: No	6	6	TN	TN	TN	TN	TN	TP
10.1021/cm202876r	Main	4	0	0	0	1	0	0	Figures: (4);(6)_x000D_ Nitrogen Isotherm: No	4	46	TN	TN	TN	TP	TN	FP
10.1021/cm202876r	Main	5	0	0	0	0	0	1	The provided image does not contain a nitrogen isotherm plot. The figures shown include magnetic susceptibility data and are not related to nitrogen adsorption-desorption isotherms, PXRD patterns, TGA curves, crystal structures or topology illustrations, or other gas sorption isotherms._x000D_ _x000D_ Template for your answer if no nitrogen isotherm or CCDC code is found:_x000D_ _x000D_ Figures: …	6	6	TN	TN	TN	TN	TN	TP
10.1021/cm202876r	Main	6	0	0	0	0	0	1	Figures: (6) It does not have figures or have figures than not belong to above class_x000D_ Nitrogen Isotherm: No	6	6	TN	TN	TN	TN	TN	TP
10.1021/cm202876r	Main	7	0	0	0	0	0	1	Figures: (6) It does not have figures or have figures than not belong to above class_x000D_ Nitrogen Isotherm: No	6	6	TN	TN	TN	TN	TN	TP
10.1021/cm202876r	Main	8	0	0	0	0	0	1	Figures: (6) It does not have figures or have figures than not belong to the above class_x000D_ Nitrogen Isotherm: No	6	6	TN	TN	TN	TN	TN	TP
10.1021/cm500700z	Supporting Information	1	0	0	0	0	0	1	The image provided is the supporting information cover page for a scientific paper titled "Efficient_x000D_ _x000D_ Photoluminescence via Metal-Ligand Alteration in a New MOFs Family". It contains the title of the paper, the authors' names, and their affiliated institutions, but no figures or graphs._x000D_ _x000D_ Based on the content visible in the image, I can provide the following answers:_x0…	6	6	TN	TN	TN	TN	TN	TP
10.1021/cm500700z	Supporting Information	2	0	0	0	0	0	1	Figures: (6) It does not have figures or have figures than not belong to the above class_x000D_ Nitrogen Isotherm: No	6	6	TN	TN	TN	TN	TN	TP
10.1021/cm500700z	Supporting Information	3	0	1	0	0	0	0	Figures: (2)_x000D_ Nitrogen Isotherm: No	2	2	TN	TP	TN	TN	TN	TN
10.1021/cm500700z	Supporting Information	4	0	1	0	0	0	0	Figures: (2) PXRD pattern_x000D_ Nitrogen Isotherm: No	2	2	TN	TP	TN	TN	TN	TN
10.1021/cm500700z	Supporting Information	5	0	1	0	0	0	0	Figures: (2) PXRD pattern_x000D_ Nitrogen Isotherm: No	2	2	TN	TP	TN	TN	TN	TN
10.1021/cm500700z	Supporting Information	6	0	1	0	0	0	0	Figures: (2)_x000D_ Nitrogen Isotherm: No	2	2	TN	TP	TN	TN	TN	TN
10.1021/cm500700z	Supporting Information	7	0	1	0	0	0	0	Figures: (2)_x000D_ Nitrogen Isotherm: No	2	2	TN	TP	TN	TN	TN	TN
10.1021/cm500700z	Supporting Information	8	0	0	0	0	0	1	Figures: (6) It does not have figures or have figures than not belong to above class_x000D_ Nitrogen Isotherm: No	6	6	TN	TN	TN	TN	TN	TP
10.1021/cm500700z	Supporting Information	9	0	0	1	0	0	0	Figures: (3)_x000D_ Nitrogen Isotherm: No	3	3	TN	TN	TP	TN	TN	TN
10.1021/cm500700z	Supporting Information	10	0	0	1	0	0	0	Figures: (3)_x000D_ Nitrogen Isotherm: No	3	3	TN	TN	TP	TN	TN	TN
10.1021/cm500700z	Supporting Information	11	0	0	1	0	0	0	Figures: (3)_x000D_ Nitrogen Isotherm: No	3	3	TN	TN	TP	TN	TN	TN
10.1021/cm500700z	Supporting Information	12	0	0	1	0	0	0	Figures: (3)_x000D_ Nitrogen Isotherm: No	3	3	TN	TN	TP	TN	TN	TN
10.1021/cm500700z	Supporting Information	13	0	0	1	0	0	0	Figures: (3)_x000D_ Nitrogen Isotherm: No	3	3	TN	TN	TP	TN	TN	TN
10.1021/cm500700z	Supporting Information	14	0	0	0	0	0	1	Figures: (6) It does not have figures or have figures than not belong to above class_x000D_ Nitrogen Isotherm: No	6	6	TN	TN	TN	TN	TN	TP
10.1021/cm500700z	Supporting Information	15	0	0	0	0	0	1	Figures: (6) It does not have figures or have figures than not belong to above class_x000D_ Nitrogen Isotherm: No	6	6	TN	TN	TN	TN	TN	TP
10.1021/cm500700z	Supporting Information	16	0	0	0	0	0	1	Figures: (6) It does not have figures or have figures than not belong to above class_x000D_ Nitrogen Isotherm: No	6	6	TN	TN	TN	TN	TN	TP
10.1021/cm500700z	Supporting Information	17	0	0	0	0	0	1	Figures: (6) It does not have figures or have figures than not belong to above class_x000D_ Nitrogen Isotherm: No	6	6	TN	TN	TN	TN	TN	TP
10.1021/cm500700z	Supporting Information	18	0	0	0	0	0	1	Figures: (6) It does not have figures or have figures than not belong to above class_x000D_ Nitrogen Isotherm: No	6	6	TN	TN	TN	TN	TN	TP
10.1021/cm500700z	Supporting Information	19	0	0	0	0	0	1	Figures: (6) It does not have figures or have figures than not belong to above class_x000D_ Nitrogen Isotherm: No	6	6	TN	TN	TN	TN	TN	TP
10.1021/cm500700z	Supporting Information	20	0	0	0	0	0	1	Figures: (6) It does not have figures or have figures that do not belong to the above class._x000D_ Nitrogen Isotherm: No	6	6	TN	TN	TN	TN	TN	TP
10.1021/cm500700z	Supporting Information	21	0	0	0	0	0	1	Figures: (6) It does not have figures or have figures than not belong to above class_x000D_ Nitrogen Isotherm: No	6	6	TN	TN	TN	TN	TN	TP
10.1021/cm500700z	Supporting Information	22	0	0	0	0	0	1	Figures: (6) It does not have figures or have figures than not belong to above class_x000D_ Nitrogen Isotherm: No	6	6	TN	TN	TN	TN	TN	TP
10.1021/cm500700z	Supporting Information	23	0	0	0	0	0	1	Figures: (6) It does not have figures or have figures than not belong to above class_x000D_ Nitrogen Isotherm: No	6	6	TN	TN	TN	TN	TN	TP
10.1021/cm500700z	Supporting Information	24	0	0	0	0	0	1	Figures: (6) It does not have figures or have figures than not belong to above class_x000D_ Nitrogen Isotherm: No	6	6	TN	TN	TN	TN	TN	TP
10.1021/cm500700z	Supporting Information	25	0	0	0	0	0	1	Figures: (6) It does not have figures or have figures than not belong to above class_x000D_ Nitrogen Isotherm: No	6	6	TN	TN	TN	TN	TN	TP
10.1021/cm500700z	Main	1	0	0	0	0	0	1	Figures: (6) It does not have figures or have figures than not belong to above class_x000D_ Nitrogen Isotherm: No	6	6	TN	TN	TN	TN	TN	TP
10.1021/cm500700z	Main	2	0	0	0	0	0	1	Figures: (6) It does not have figures or have figures than not belong to above class_x000D_ Nitrogen Isotherm: No	6	6	TN	TN	TN	TN	TN	TP
10.1021/cm500700z	Main	3	0	0	0	0	0	1	Figures: (4);(6)_x000D_ Nitrogen Isotherm: No	6	46	TN	TN	TN	FP	TN	FN
10.1021/cm500700z	Main	4	0	0	0	1	0	0	Figures: (4)_x000D_ Nitrogen Isotherm: No	4	4	TN	TN	TN	TP	TN	TN
10.1021/cm500700z	Main	5	1	0	0	1	0	0	Figures: (1);(4);(5)_x000D_ Nitrogen Isotherm: Figure 7_x000D_ Compound: N/A_x000D_ Porosity: "A structure solution from X-ray single-crystal diffraction studies was not feasible in this case due to the polycrystalline nature of this material. Alternative ways to solve the crystal structure are currently being explored. Significant insights into the properties of 5 were provided by the PXRD and T…	14	145	TP	TN	TN	TP	FP	TN
10.1021/cm500700z	Main	6	0	0	0	0	0	1	Figures: (6) It does not have figures or have figures that not belong to the above class_x000D_ Nitrogen Isotherm: No	6	6	TN	TN	TN	TN	TN	TP
10.1021/cm500700z	Main	7	0	0	0	0	0	1	Figures: (2);(5)_x000D_ Nitrogen Isotherm: No	6	25	TN	FP	TN	TN	FP	FN
10.1021/cm500700z	Main	8	0	0	0	0	0	1	Figures: (6) It does not have figures or have figures that not belong to the above class_x000D_ Nitrogen Isotherm: No	6	6	TN	TN	TN	TN	TN	TP
10.1021/cm500700z	Main	9	0	0	0	0	0	1	Figures: (6) It does not have figures or have figures than not belong to above class_x000D_ Nitrogen Isotherm: No	6	6	TN	TN	TN	TN	TN	TP
10.1021/cm501138g	Supporting Information	1	0	0	0	0	0	1	The image provided is a title page of supporting information for a scientific article and does not contain any figures. It is a textual page with the title of the paper, authors' names, affiliations, and addresses._x000D_ _x000D_ Here is the response according to your template:_x000D_ _x000D_ Figures: [Answer: (6)]_x000D_ Nitrogen Isotherm: No	6	6	TN	TN	TN	TN	TN	TP
10.1021/cm501138g	Supporting Information	2	0	0	0	0	0	1	Figures: (6) It does not have figures or have figures than not belong to above class_x000D_ Nitrogen Isotherm: No	6	6	TN	TN	TN	TN	TN	TP
10.1021/cm501138g	Supporting Information	3	0	0	0	0	0	1	Figures: [Answer: (6) It does not have figures or have figures than not belong to above class]_x000D_ Nitrogen Isotherm: No	6	6	TN	TN	TN	TN	TN	TP
10.1021/cm501138g	Supporting Information	4	0	0	0	0	0	1	Figures: (6) It does not have figures or have figures than not belong to the above class_x000D_ Nitrogen Isotherm: No	6	6	TN	TN	TN	TN	TN	TP
10.1021/cm501138g	Main	1	0	0	0	0	0	1	Figures: (6) It does not have figures or have figures than not belong to above class_x000D_ Nitrogen Isotherm: No	6	6	TN	TN	TN	TN	TN	TP
10.1021/cm501138g	Main	2	0	0	0	1	0	0	Figures: (4) Crystal structure or topology illustration_x000D_ Nitrogen Isotherm: No	4	4	TN	TN	TN	TP	TN	TN
10.1021/cm501138g	Main	3	0	0	0	0	0	1	Figures: (6) It does not have figures or have figures than not belong to above class_x000D_ Nitrogen Isotherm: No	6	6	TN	TN	TN	TN	TN	TP
10.1021/cm501138g	Main	4	0	0	0	1	0	0	Figures: (4);(6)_x000D_ Nitrogen Isotherm: No	4	46	TN	TN	TN	TP	TN	FP
10.1021/cm501138g	Main	5	0	0	0	1	0	0	Figures: (4)_x000D_ Nitrogen Isotherm: No	4	4	TN	TN	TN	TP	TN	TN
10.1021/cm501138g	Main	6	0	0	0	1	0	0	Figures: (4) Crystal structure or topology illustration_x000D_ Nitrogen Isotherm: No	4	4	TN	TN	TN	TP	TN	TN
10.1021/cm501138g	Main	7	0	0	0	1	0	0	Figures: (4);(5)_x000D_ Nitrogen Isotherm: No	4	45	TN	TN	TN	TP	FP	TN
10.1021/cm501138g	Main	8	0	0	0	1	1	0	Figures: (4);(5)_x000D_ Nitrogen Isotherm: Figure 7, panels (a) and (b)_x000D_ Compound: MeOH, EtOH, 1-PrOH, 2-PrOH_x000D_ Porosity: N/A_x000D_ Hysteresis: Yes_x000D_ Saturation: (a) 8-10 cm??/g, (b) 3-5 cm??/g_x000D_ Position: (0.6, 0.4, 1, 0.85)	45	45	TN	TN	TN	TP	TP	TN
10.1021/cm501138g	Main	9	0	0	0	0	0	1	Figures: (6) It does not have figures or have figures than not belong to above class_x000D_ Nitrogen Isotherm: No	6	6	TN	TN	TN	TN	TN	TP
10.1021/cm501138g	Main	10	0	0	0	0	0	1	Figures: (6) It does not have figures or have figures that do not belong to the above class_x000D_ Nitrogen Isotherm: No	6	6	TN	TN	TN	TN	TN	TP
10.1021/cm501138g	Main	11	0	0	0	0	0	1	Figures: (6) It does not have figures or have figures than not belong to above class_x000D_ Nitrogen Isotherm: No	6	6	TN	TN	TN	TN	TN	TP
10.1021/cm501138g	Main	12	0	0	0	0	0	1	Figures: (6) It does not have figures or have figures than not belong to above class_x000D_ Nitrogen Isotherm: No	6	6	TN	TN	TN	TN	TN	TP
10.1021/cm503311x	Supporting Information	1	0	0	0	0	0	1	Figures: [Answer: (6)]_x000D_ Nitrogen Isotherm: No	6	6	TN	TN	TN	TN	TN	TP
10.1021/cm503311x	Supporting Information	2	0	1	1	0	0	0	Figures: (2);(3)_x000D_ Nitrogen Isotherm: No	23	23	TN	TP	TP	TN	TN	TN
10.1021/cm503311x	Supporting Information	3	0	1	1	0	0	0	Figures: (2);(3)_x000D_ Nitrogen Isotherm: No	23	23	TN	TP	TP	TN	TN	TN
10.1021/cm503311x	Supporting Information	4	0	0	0	0	0	1	Figures: (6) It does not have figures or have figures than not belong to above class_x000D_ Nitrogen Isotherm: No	6	6	TN	TN	TN	TN	TN	TP
10.1021/cm503311x	Supporting Information	5	0	0	0	0	0	1	Figures: (6) It does not have figures or have figures than not belong to above class_x000D_ Nitrogen Isotherm: No	6	6	TN	TN	TN	TN	TN	TP
10.1021/cm503311x	Supporting Information	6	0	0	0	0	0	1	Figures: (6) It does not have figures or have figures than not belong to above class_x000D_ Nitrogen Isotherm: No	6	6	TN	TN	TN	TN	TN	TP
10.1021/cm503311x	Supporting Information	7	1	0	0	0	0	0	Figures: (1);(5)_x000D_ Nitrogen Isotherm: Figure S16_x000D_ Compound: mono-Ip-[AlF(bdc)]_x000D_ Porosity: N/A_x000D_ Hysteresis: Yes_x000D_ Saturation: 300 - 400 cm^3/g_x000D_ Position: (0, 0.1, 1, 0.6)	1	15	TP	TN	TN	TN	FP	TN
10.1021/cm503311x	Supporting Information	8	0	0	0	0	0	1	Figures: (6) It does not have figures or have figures than not belong to the above class._x000D_ Nitrogen Isotherm: No	6	6	TN	TN	TN	TN	TN	TP
10.1021/cm503311x	Supporting Information	9	0	0	0	0	0	1	Figures: (6) It does not have figures or have figures than not belong to above class_x000D_ Nitrogen Isotherm: No	6	6	TN	TN	TN	TN	TN	TP
10.1021/cm503311x	Main	1	0	0	0	0	0	1	Figures: (6) It does not have figures or have figures than not belong to above class_x000D_ Nitrogen Isotherm: No	6	6	TN	TN	TN	TN	TN	TP
10.1021/cm503311x	Main	2	0	0	0	0	0	1	Figures: (6) It does not have figures or have figures than not belong to above class_x000D_ Nitrogen Isotherm: No	6	6	TN	TN	TN	TN	TN	TP
10.1021/cm503311x	Main	3	0	1	0	0	0	0	Figures: (2);(5)_x000D_ Nitrogen Isotherm: Figure 1 (b) and (c)_x000D_ Compound: ortho-Ip-Al(Fbdc); lp-Al(Fbdc)_x000D_ Porosity: N/A_x000D_ Hysteresis: Yes_x000D_ Saturation: 300 - 400 cm^3/g_x000D_ Position: (0.6, 0.5, 1, 0.9)	2	25	TN	TP	TN	TN	FP	TN
10.1021/cm503311x	Main	4	0	0	0	1	0	0	Figures: (4)_x000D_ Nitrogen Isotherm: No	4	4	TN	TN	TN	TP	TN	TN
10.1021/cm503311x	Main	5	0	0	0	1	0	0	Figures: (4)_x000D_ Nitrogen Isotherm: No	4	4	TN	TN	TN	TP	TN	TN
10.1021/cm503311x	Main	6	0	0	0	1	0	0	Figures: (4) Crystal structure or topology illustration_x000D_ Nitrogen Isotherm: No	4	4	TN	TN	TN	TP	TN	TN
10.1021/cm503311x	Main	7	0	0	0	0	0	1	Figures: (6) It does not have figures or have figures than not belong to above class_x000D_ Nitrogen Isotherm: No	6	6	TN	TN	TN	TN	TN	TP
10.1021/cm503311x	Main	8	0	0	0	0	0	1	Figures: (4)_x000D_ Nitrogen Isotherm: No	6	4	TN	TN	TN	FP	TN	FN
10.1021/cm503311x	Main	9	0	0	0	0	0	1	Figures: (6) It does not have figures or have figures that do not belong to the above class._x000D_ Nitrogen Isotherm: No	6	6	TN	TN	TN	TN	TN	TP
10.1021/cm503311x	Main	10	0	0	0	0	0	1	Figures: (6) It does not have figures or have figures than not belong to above class_x000D_ Nitrogen Isotherm: No	6	6	TN	TN	TN	TN	TN	TP
10.1021/cm503311x	Main	11	0	0	0	0	0	1	Figures: (6) It does not have figures or have figures than not belong to above class_x000D_ Nitrogen Isotherm: No	6	6	TN	TN	TN	TN	TN	TP
10.1021/cm504350q	Supporting Information	1	0	0	0	0	0	1	Figures: (6) It does not have figures or have figures than not belong to above class_x000D_ Nitrogen Isotherm: No	6	6	TN	TN	TN	TN	TN	TP
10.1021/cm504350q	Supporting Information	2	0	0	0	0	0	1	Figures: [Answer: (6) It does not have figures or have figures that do not belong to the above class]_x000D_ Nitrogen Isotherm: No	6	6	TN	TN	TN	TN	TN	TP
10.1021/cm504350q	Supporting Information	3	0	0	0	0	0	1	Figures: [Answer: (6)]_x000D_ Nitrogen Isotherm: No	6	6	TN	TN	TN	TN	TN	TP
10.1021/cm504350q	Supporting Information	4	0	0	0	0	0	1	Figures: (6) It does not have figures or have figures than not belong to above class_x000D_ Nitrogen Isotherm: No	6	6	TN	TN	TN	TN	TN	TP
10.1021/cm504350q	Supporting Information	5	0	0	0	0	0	1	Figures: (6) It does not have figures or have figures than not belong to above class_x000D_ Nitrogen Isotherm: No	6	6	TN	TN	TN	TN	TN	TP
10.1021/cm504350q	Supporting Information	6	0	0	0	0	0	1	Figures: (6) It does not have figures or have figures than not belong to the above class_x000D_ Nitrogen Isotherm: No	6	6	TN	TN	TN	TN	TN	TP
10.1021/cm504350q	Supporting Information	7	0	0	0	1	0	0	Figures: (4)_x000D_ Nitrogen Isotherm: No	4	4	TN	TN	TN	TP	TN	TN
10.1021/cm504350q	Supporting Information	8	0	0	1	1	0	0	Figures: (4);(3)_x000D_ Nitrogen Isotherm: Figure S3_x000D_ Compound: Tb-MOF_x000D_ Porosity: N/A_x000D_ Hysteresis: I do not know_x000D_ Saturation: 60 - 70_x000D_ Position: (0.1,0.55,0.9,1)	34	34	TN	TN	TP	TP	TN	TN
10.1021/cm504350q	Supporting Information	9	0	1	0	0	0	0	Figures: (2);(5)_x000D_ Nitrogen Isotherm: No	2	25	TN	TP	TN	TN	FP	TN
10.1021/cm504350q	Supporting Information	10	0	0	0	0	0	1	Figures: (6) It does not have figures or have figures than not belong to above class_x000D_ Nitrogen Isotherm: No	6	6	TN	TN	TN	TN	TN	TP
10.1021/cm504350q	Supporting Information	11	0	0	0	0	0	1	Figures: (6) It does not have figures or have figures than not belong to above class_x000D_ Nitrogen Isotherm: No	6	6	TN	TN	TN	TN	TN	TP
10.1021/cm504350q	Supporting Information	12	0	0	0	0	0	1	Figures: (6) It does not have figures or have figures than not belong to above class_x000D_ Nitrogen Isotherm: No	6	6	TN	TN	TN	TN	TN	TP
10.1021/cm504350q	Main	1	0	0	0	0	0	1	Figures: (6) It does not have figures or have figures than not belong to above class_x000D_ Nitrogen Isotherm: No	6	6	TN	TN	TN	TN	TN	TP
10.1021/cm504350q	Main	2	0	0	0	1	0	0	Figures: (4);(6)_x000D_ Nitrogen Isotherm: No	4	46	TN	TN	TN	TP	TN	FP
10.1021/cm504350q	Main	3	0	0	0	1	0	0	Figures: (4);(5)_x000D_ Nitrogen Isotherm: No_x000D_	4	45	TN	TN	TN	TP	FP	TN
10.1021/cm504350q	Main	4	0	1	0	0	0	0	Figures: (2)_x000D_ Nitrogen Isotherm: Figure 6(b)_x000D_ Compound: Tb-MOF_x000D_ Porosity: N/A_x000D_ Hysteresis: I do not know_x000D_ Saturation: 5 - 6.5 cm??/g_x000D_ Position: (0.1, 0.5, 0.5, 0.7)	2	2	TN	TP	TN	TN	TN	TN
10.1021/cm504350q	Main	5	0	0	0	0	0	1	Figures: [Answer: (6) It does not have figures or have figures than not belong to above class]_x000D_ Nitrogen Isotherm: No	6	6	TN	TN	TN	TN	TN	TP
10.1021/cm901983a	Supporting Information	1	0	0	0	0	0	1	It appears that you've uploaded a cover or title page of a scientific report or supplementary materials of a research paper about MIL-100 (Al), a type of metal-organic framework (MOF). However, from this page alone, we cannot determine any specifics regarding figures, nitrogen isotherms, compound names, porosity information, or saturation amounts of nitrogen gas because:_x000D_ _x000D_ 1. No figu…	6	6	TN	TN	TN	TN	TN	TP
10.1021/cm901983a	Supporting Information	2	0	0	0	0	0	1	Figures: (6) It does not have figures or have figures than not belong to above class_x000D_ Nitrogen Isotherm: No	6	6	TN	TN	TN	TN	TN	TP
10.1021/cm901983a	Supporting Information	3	0	0	0	0	0	1	Figures: (6) It does not have figures or have figures than not belong to the above class._x000D_ Nitrogen Isotherm: No	6	6	TN	TN	TN	TN	TN	TP
10.1021/cm901983a	Supporting Information	4	0	1	0	0	0	0	Figures: (2)_x000D_ Nitrogen Isotherm: No	2	2	TN	TP	TN	TN	TN	TN
10.1021/cm901983a	Supporting Information	5	0	0	0	0	0	1	Figures: (6) It does not have figures or have figures than not belong to above class_x000D_ Nitrogen Isotherm: No	6	6	TN	TN	TN	TN	TN	TP
10.1021/cm901983a	Supporting Information	6	0	0	0	0	0	1	Figures: (6) It does not have figures or have figures than not belong to above class_x000D_ Nitrogen Isotherm: No	6	6	TN	TN	TN	TN	TN	TP
10.1021/cm901983a	Supporting Information	7	0	0	0	1	0	0	Figures: (4) Crystal structure or topology illustration_x000D_ Nitrogen Isotherm: No	4	4	TN	TN	TN	TP	TN	TN
10.1021/cm901983a	Supporting Information	8	0	0	0	0	0	1	Figures: (6) It does not have figures or have figures than not belong to above class_x000D_ Nitrogen Isotherm: No	6	6	TN	TN	TN	TN	TN	TP
10.1021/cm901983a	Supporting Information	9	0	0	0	0	0	1	Figures: (6) It does not have figures or have figures than not belong to above class_x000D_ Nitrogen Isotherm: No	6	6	TN	TN	TN	TN	TN	TP
10.1021/cm901983a	Supporting Information	10	0	0	1	0	0	0	Figures: (3)_x000D_ Nitrogen Isotherm: No	3	3	TN	TN	TP	TN	TN	TN
10.1021/cm901983a	Supporting Information	11	1	0	0	0	0	0	Figures: (1)_x000D_ Nitrogen Isotherm: Figure S6_x000D_ Compound: MIL-100 (Al)_x000D_ Porosity: The measured BET surface area is 2152(39) m^2??g^-1 with a micropore volume of 0.82 cm^3??g^-1 and assuming a monolayer coverage by nitrogen the Langmuir surface area is 2919(44) m^2??g^-1._x000D_ Hysteresis: No_x000D_ Saturation: 500 - 600 cm^3/g_x000D_ Position: (0, 0, 1, 0.6)	1	1	TP	TN	TN	TN	TN	TN
10.1021/cm901983a	Main	1	0	0	0	0	0	1	Figures: (6) It does not have figures or have figures than not belong to the above class_x000D_ Nitrogen Isotherm: No	6	6	TN	TN	TN	TN	TN	TP
10.1021/cm901983a	Main	2	0	0	0	0	0	1	Figures: (4);(6)_x000D_ Nitrogen Isotherm: No	6	46	TN	TN	TN	FP	TN	FN
10.1021/cm901983a	Main	3	0	0	0	1	0	0	Figures: (4)_x000D_ Nitrogen Isotherm: No	4	4	TN	TN	TN	TP	TN	TN
10.1021/ic025743v	Main	1	0	0	0	0	0	1	Figures: [Answer: (6) It does not have figures or have figures that not belong to the above class]_x000D_ Nitrogen Isotherm: No	6	6	TN	TN	TN	TN	TN	TP
10.1021/ic025743v	Main	2	0	0	0	0	0	1	Figures: (6) It does not have figures or have figures than not belong to above class_x000D_ Nitrogen Isotherm: No	6	6	TN	TN	TN	TN	TN	TP
10.1021/ic025743v	Main	3	0	0	0	0	0	1	Figures: (6) It does not have figures or have figures that not belong to the above class_x000D_ Nitrogen Isotherm: No	6	6	TN	TN	TN	TN	TN	TP
10.1021/ic025743v	Main	4	0	0	0	0	0	1	Figures: [Answer: (6)]_x000D_ Nitrogen Isotherm: No	6	6	TN	TN	TN	TN	TN	TP
10.1021/ic025743v	Main	5	0	0	0	1	0	0	Figures: (4)_x000D_ Nitrogen Isotherm: No	4	4	TN	TN	TN	TP	TN	TN
10.1021/ic025743v	Main	6	0	0	0	1	0	0	Figures: (4)_x000D_ Nitrogen Isotherm: No	4	4	TN	TN	TN	TP	TN	TN
10.1021/ic025743v	Main	7	0	0	0	0	0	1	Figures: (5)_x000D_ Nitrogen Isotherm: Figure 5_x000D_ Compound: Complex 4_x000D_ Porosity: N/A_x000D_ Hysteresis: No_x000D_ Saturation: 500 - 600 cm3/g_x000D_ Position: (0.7, 0.4, 1, 0.6)	6	5	TN	TN	TN	TN	FP	FN
10.1021/ic025743v	Main	8	0	0	0	0	0	1	Figures: (6) It does not have figures or have figures than not belong to above class_x000D_ Nitrogen Isotherm: No	6	6	TN	TN	TN	TN	TN	TP
10.1021/ic025743v	Main	9	0	0	0	0	0	1	Figures: (6) It does not have figures or have figures than not belong to above class_x000D_ Nitrogen Isotherm: No	6	6	TN	TN	TN	TN	TN	TP
10.1021/ic034943j	Supporting Information	1	0	0	0	0	0	1	Figures: (6) It does not have figures or have figures than not belong to above class_x000D_ Nitrogen Isotherm: No	6	6	TN	TN	TN	TN	TN	TP
10.1021/ic034943j	Main	1	0	0	0	0	0	1	Figures: (6) It does not have figures or have figures than not belong to above class_x000D_ Nitrogen Isotherm: No	6	6	TN	TN	TN	TN	TN	TP
10.1021/ic034943j	Main	2	0	0	0	1	0	0	Figures: (4)_x000D_ Nitrogen Isotherm: No	4	4	TN	TN	TN	TP	TN	TN
10.1021/ic034943j	Main	3	0	0	0	1	0	0	Figures: (4)_x000D_ Nitrogen Isotherm: No	4	4	TN	TN	TN	TP	TN	TN
10.1021/ic050064g	Supporting Information	1	0	0	0	0	0	1	Figures: (6) It does not have figures or have figures than not belong to above class_x000D_ Nitrogen Isotherm: No	6	6	TN	TN	TN	TN	TN	TP
10.1021/ic050064g	Supporting Information	2	0	0	0	0	0	1	Figures: (6) It does not have figures or have figures than not belong to above class_x000D_ Nitrogen Isotherm: No	6	6	TN	TN	TN	TN	TN	TP
10.1021/ic050064g	Supporting Information	3	0	0	0	1	0	0	Figures: (4) Crystal structure or topology illustration_x000D_ Nitrogen Isotherm: No	4	4	TN	TN	TN	TP	TN	TN
10.1021/ic050064g	Supporting Information	4	0	0	0	0	0	1	Figures: (6) It does not have figures or have figures than not belong to above class_x000D_ Nitrogen Isotherm: No	6	6	TN	TN	TN	TN	TN	TP
10.1021/ic050064g	Supporting Information	5	0	0	0	0	0	1	Figures: (6) It does not have figures or have figures than not belong to above class_x000D_ Nitrogen Isotherm: No	6	6	TN	TN	TN	TN	TN	TP
10.1021/ic050064g	Supporting Information	6	0	0	0	0	0	1	Figures: (6) It does not have figures or have figures than not belong to above class_x000D_ Nitrogen Isotherm: No	6	6	TN	TN	TN	TN	TN	TP
10.1021/ic050064g	Supporting Information	7	0	0	0	0	0	1	Figures: (6) It does not have figures or have figures than not belong to above class_x000D_ Nitrogen Isotherm: No	6	6	TN	TN	TN	TN	TN	TP
10.1021/ic050064g	Supporting Information	8	0	0	0	0	0	1	Figures: (6) It does not have figures or have figures than not belong to above class_x000D_ Nitrogen Isotherm: No	6	6	TN	TN	TN	TN	TN	TP
10.1021/ic050064g	Supporting Information	9	0	0	0	0	0	1	Figures: (6) It does not have figures or have figures than not belong to above class_x000D_ Nitrogen Isotherm: No	6	6	TN	TN	TN	TN	TN	TP
10.1021/ic050064g	Supporting Information	10	0	0	0	0	0	1	Figures: (6) It does not have figures or have figures than not belong to above class_x000D_ Nitrogen Isotherm: No	6	6	TN	TN	TN	TN	TN	TP
10.1021/ic050064g	Supporting Information	11	0	0	0	0	0	1	Figures: (4) Crystal structure or topology illustration_x000D_ Nitrogen Isotherm: No	6	4	TN	TN	TN	FP	TN	FN
10.1021/ic050064g	Supporting Information	12	0	0	0	0	0	1	Figures: (6) It does not have figures or have figures than not belong to above class_x000D_ Nitrogen Isotherm: No	6	6	TN	TN	TN	TN	TN	TP
10.1021/ic050064g	Supporting Information	13	0	0	0	0	0	1	Figures: (6) It does not have figures or have figures than not belong to above class_x000D_ Nitrogen Isotherm: No	6	6	TN	TN	TN	TN	TN	TP
10.1021/ic050064g	Supporting Information	14	0	0	0	0	0	1	Figures: (6) It does not have figures or have figures than not belong to the above class_x000D_ Nitrogen Isotherm: No	6	6	TN	TN	TN	TN	TN	TP
10.1021/ic050064g	Supporting Information	15	0	0	0	0	0	1	Figures: (6)_x000D_ Nitrogen Isotherm: No	6	6	TN	TN	TN	TN	TN	TP
10.1021/ic050064g	Supporting Information	16	0	0	0	0	0	1	Figures: (6) It does not have figures or have figures than not belong to above class_x000D_ Nitrogen Isotherm: No	6	6	TN	TN	TN	TN	TN	TP
10.1021/ic050064g	Supporting Information	17	0	0	0	0	0	1	Figures: (6) It does not have figures or have figures than not belong to above class_x000D_ Nitrogen Isotherm: No	6	6	TN	TN	TN	TN	TN	TP
10.1021/ic050064g	Supporting Information	18	0	0	0	0	0	1	Figures: (6) It does not have figures or have figures than not belong to above class_x000D_ Nitrogen Isotherm: No	6	6	TN	TN	TN	TN	TN	TP
10.1021/ic050064g	Supporting Information	19	0	0	0	0	0	1	Figures: (6) It does not have figures or have figures that do not belong to the above class._x000D_ Nitrogen Isotherm: No	6	6	TN	TN	TN	TN	TN	TP
10.1021/ic050064g	Supporting Information	20	0	0	0	0	0	1	Figures: (6)_x000D_ Nitrogen Isotherm: No	6	6	TN	TN	TN	TN	TN	TP
10.1021/ic050064g	Supporting Information	21	0	0	0	0	0	1	Figures: (6)_x000D_ Nitrogen Isotherm: No	6	6	TN	TN	TN	TN	TN	TP
10.1021/ic050064g	Supporting Information	22	0	0	0	0	0	1	Figures: (6)_x000D_ Nitrogen Isotherm: No	6	6	TN	TN	TN	TN	TN	TP
10.1021/ic050064g	Supporting Information	23	0	0	0	0	0	1	Figures: (6) It does not have figures or have figures than not belong to above class_x000D_ Nitrogen Isotherm: No	6	6	TN	TN	TN	TN	TN	TP
10.1021/ic050064g	Supporting Information	24	0	1	0	0	0	0	Figures: (2)_x000D_ Nitrogen Isotherm: No	2	2	TN	TP	TN	TN	TN	TN
10.1021/ic050064g	Supporting Information	25	0	1	0	0	0	0	Figures: (2)_x000D_ Nitrogen Isotherm: No	2	2	TN	TP	TN	TN	TN	TN
10.1021/ic050064g	Supporting Information	26	0	0	0	0	0	1	Figures: (6) It does not have figures or have figures that not belong to the above class._x000D_ Nitrogen Isotherm: No	6	6	TN	TN	TN	TN	TN	TP
10.1021/ic050064g	Supporting Information	27	0	0	0	0	0	1	Figures: (6) It does not have figures or have figures than not belong to above class_x000D_ Nitrogen Isotherm: No	6	6	TN	TN	TN	TN	TN	TP
10.1021/ic050064g	Supporting Information	28	0	0	0	0	0	1	Figures: (6) It does not have figures or have figures than not belong to above class_x000D_ Nitrogen Isotherm: No	6	6	TN	TN	TN	TN	TN	TP
10.1021/ic050064g	Supporting Information	29	0	0	1	0	0	0	Figures: (3)_x000D_ Nitrogen Isotherm: No	3	3	TN	TN	TP	TN	TN	TN
10.1021/ic050064g	Supporting Information	30	0	0	1	0	0	0	Figures: (3)_x000D_ Nitrogen Isotherm: No	3	3	TN	TN	TP	TN	TN	TN
10.1021/ic050064g	Main	1	0	0	0	1	0	0	Figures: (4);(6)_x000D_ Nitrogen Isotherm: No	4	46	TN	TN	TN	TP	TN	FP
10.1021/ic050064g	Main	2	0	0	0	1	0	0	Figures: (4)_x000D_ Nitrogen Isotherm: No	4	4	TN	TN	TN	TP	TN	TN
10.1021/ic050064g	Main	3	0	0	0	1	0	0	Figures: (4)_x000D_ Nitrogen Isotherm: No	4	4	TN	TN	TN	TP	TN	TN
10.1021/ic051810k	Supporting Information	1	0	0	0	0	0	1	The image you've provided is a text page and does not contain any figures. Therefore, I will provide the template answer for when no nitrogen isotherm or figures are present._x000D_ _x000D_ ***_x000D_ _x000D_ Figures: (6) It does not have figures or have figures than not belong to above class_x000D_ Nitrogen Isotherm: No_x000D_ _x000D_ ***	6	6	TN	TN	TN	TN	TN	TP
10.1021/ic051810k	Supporting Information	2	0	0	0	0	0	1	Figures: (6) It does not have figures or have figures that do not belong to the above class._x000D_ Nitrogen Isotherm: No	6	6	TN	TN	TN	TN	TN	TP
10.1021/ic051810k	Supporting Information	3	0	0	0	0	0	1	Figures: (6) It does not have figures or have figures than not belong to above class_x000D_ Nitrogen Isotherm: No	6	6	TN	TN	TN	TN	TN	TP
10.1021/ic051810k	Supporting Information	4	0	1	0	0	0	0	Figures: (2) PXRD pattern_x000D_ Nitrogen Isotherm: No	2	2	TN	TP	TN	TN	TN	TN
10.1021/ic051810k	Supporting Information	5	0	1	0	0	0	0	Figures: (2)_x000D_ Nitrogen Isotherm: No	2	2	TN	TP	TN	TN	TN	TN
10.1021/ic051810k	Supporting Information	6	0	0	1	0	0	0	Figures: (3)_x000D_ Nitrogen Isotherm: No	3	3	TN	TN	TP	TN	TN	TN
10.1021/ic051810k	Supporting Information	7	0	0	1	0	0	0	Figures: (3)_x000D_ Nitrogen Isotherm: No	3	3	TN	TN	TP	TN	TN	TN
10.1021/ic051810k	Main	1	0	0	0	0	0	1	Figures: (6) It does not have figures or have figures than not belong to above class_x000D_ Nitrogen Isotherm: No	6	6	TN	TN	TN	TN	TN	TP
10.1021/ic051810k	Main	2	0	0	0	0	0	1	Figures: (6) It does not have figures or have figures than not belong to above class_x000D_ Nitrogen Isotherm: No	6	6	TN	TN	TN	TN	TN	TP
10.1021/ic051810k	Main	3	0	0	0	1	0	0	Figures: (4)_x000D_ Nitrogen Isotherm: No	4	4	TN	TN	TN	TP	TN	TN
10.1021/ic051810k	Main	4	0	0	0	1	0	0	Figures: (4) Crystal structure or topology illustration_x000D_ Nitrogen Isotherm: No	4	4	TN	TN	TN	TP	TN	TN
10.1021/ic051810k	Main	5	0	0	0	1	0	0	Figures: (4)_x000D_ Nitrogen Isotherm: No	4	4	TN	TN	TN	TP	TN	TN
10.1021/ic051810k	Main	6	0	0	0	0	1	0	Figures: (5)_x000D_ Nitrogen Isotherm: Figure 9; Figure 10_x000D_ Compound: 1; 2_x000D_ Porosity: N/A_x000D_ Hysteresis: I do not know_x000D_ Saturation: Figure 9: 150 - 200 cm^3/g; Figure 10: 150 - 200 cm^3/g_x000D_ Position: (0, 0.5, 0.55, 0.75); (0.55, 0.5, 1, 0.75)	5	5	TN	TN	TN	TN	TP	TN
10.1021/ic0520162	Supporting Information	1	0	0	0	1	0	0	Figures: (4) Crystal structure or topology illustration_x000D_ Nitrogen Isotherm: No	4	4	TN	TN	TN	TP	TN	TN
10.1021/ic0520162	Supporting Information	2	0	0	0	1	0	0	Figures: (4) Crystal structure or topology illustration_x000D_ Nitrogen Isotherm: No	4	4	TN	TN	TN	TP	TN	TN
10.1021/ic0520162	Supporting Information	3	0	1	0	1	0	0	Figures: (4);(2);(2)_x000D_ Nitrogen Isotherm: No_x000D_	24	24	TN	TP	TN	TP	TN	TN
10.1021/ic0520162	Main	1	0	0	0	0	0	1	Figures: [Answer: (6) It does not have figures or have figures than not belong to above class]_x000D_ Nitrogen Isotherm: No	6	6	TN	TN	TN	TN	TN	TP
10.1021/ic0520162	Main	2	0	0	0	0	0	1	Figures: (6) It does not have figures or have figures that not belong to the above class_x000D_ Nitrogen Isotherm: No	6	6	TN	TN	TN	TN	TN	TP
10.1021/ic0520162	Main	3	0	0	0	1	0	0	Figures: (4)_x000D_ Nitrogen Isotherm: No	4	4	TN	TN	TN	TP	TN	TN
10.1021/ic0520162	Main	4	0	0	0	1	0	0	Figures: (4)_x000D_ Nitrogen Isotherm: No	4	4	TN	TN	TN	TP	TN	TN
10.1021/ic0520162	Main	5	0	0	0	1	0	0	Figures: (4)_x000D_ Nitrogen Isotherm: No	4	4	TN	TN	TN	TP	TN	TN
10.1021/ic0520162	Main	6	0	1	1	0	0	0	Figures: (2);(3)_x000D_ Nitrogen Isotherm: No	23	23	TN	TP	TP	TN	TN	TN
10.1021/ic0520162	Main	7	0	0	0	0	0	1	Figures: (6) It does not have figures or have figures than not belong to above class_x000D_ Nitrogen Isotherm: No	6	6	TN	TN	TN	TN	TN	TP
10.1021/ic060030o	Supporting Information	1	0	0	0	1	0	0	Figures: (4) Crystal structure or topology illustration_x000D_ Nitrogen Isotherm: No	4	4	TN	TN	TN	TP	TN	TN
10.1021/ic060030o	Main	1	0	0	0	0	0	1	Figures: [Answer: (6) It does not have figures or have figures than not belong to above class]_x000D_ Nitrogen Isotherm: No	6	6	TN	TN	TN	TN	TN	TP
10.1021/ic060030o	Main	2	0	0	0	0	0	1	Figures: (6) It does not have figures or have figures than not belong to above class_x000D_ Nitrogen Isotherm: No	6	6	TN	TN	TN	TN	TN	TP
10.1021/ic060030o	Main	3	0	0	0	1	0	0	Figures: (4)_x000D_ Nitrogen Isotherm: No	4	4	TN	TN	TN	TP	TN	TN
10.1021/ic060030o	Main	4	0	1	1	1	0	0	Figures: (2);(3);(4)_x000D_ Nitrogen Isotherm: No	234	234	TN	TP	TP	TP	TN	TN
10.1021/ic060030o	Main	5	0	0	0	0	0	1	Figures: (6) It does not have figures or have figures than not belong to above class_x000D_ Nitrogen Isotherm: No	6	6	TN	TN	TN	TN	TN	TP
10.1021/ic060608u	Supporting Information	1	0	0	0	0	0	1	Figures: (6) It does not have figures or have figures than not belong to above class_x000D_ Nitrogen Isotherm: No	6	6	TN	TN	TN	TN	TN	TP
10.1021/ic060608u	Supporting Information	2	0	0	0	0	0	1	Figures: (6) It does not have figures or have figures than not belong to above class_x000D_ Nitrogen Isotherm: No	6	6	TN	TN	TN	TN	TN	TP
10.1021/ic060608u	Supporting Information	3	0	0	0	0	0	1	Figures: (6) It does not have figures or have figures than not belong to above class_x000D_ Nitrogen Isotherm: No	6	6	TN	TN	TN	TN	TN	TP
10.1021/ic060608u	Supporting Information	4	0	0	0	0	0	1	Figures: (6) It does not have figures or have figures than not belong to above class_x000D_ Nitrogen Isotherm: No	6	6	TN	TN	TN	TN	TN	TP
10.1021/ic060608u	Supporting Information	5	0	0	0	0	0	1	Figures: (6) It does not have figures or have figures than not belong to above class_x000D_ Nitrogen Isotherm: No	6	6	TN	TN	TN	TN	TN	TP
10.1021/ic060608u	Supporting Information	6	0	1	0	0	0	0	Figures: (2)_x000D_ Nitrogen Isotherm: No	2	2	TN	TP	TN	TN	TN	TN
10.1021/ic060608u	Supporting Information	7	0	1	0	0	0	0	Figures: (2);(5)_x000D_ Nitrogen Isotherm: No	2	25	TN	TP	TN	TN	FP	TN
10.1021/ic060608u	Supporting Information	8	0	0	0	1	0	0	Figures: (4) Crystal structure or topology illustration_x000D_ Nitrogen Isotherm: No	4	4	TN	TN	TN	TP	TN	TN
10.1021/ic060608u	Supporting Information	9	0	0	0	1	0	0	Figures: (4) Crystal structure or topology illustration_x000D_ Nitrogen Isotherm: No	4	4	TN	TN	TN	TP	TN	TN
10.1021/ic060608u	Supporting Information	10	0	0	0	1	0	0	Figures: (4) Crystal structure or topology illustration_x000D_ Nitrogen Isotherm: No	4	4	TN	TN	TN	TP	TN	TN
10.1021/ic060608u	Supporting Information	11	0	0	0	1	0	0	Figures: (4) Crystal structure or topology illustration_x000D_ Nitrogen Isotherm: No	4	4	TN	TN	TN	TP	TN	TN
10.1021/ic060608u	Supporting Information	12	0	0	1	0	0	0	Figures: (3)_x000D_ Nitrogen Isotherm: No	3	3	TN	TN	TP	TN	TN	TN
10.1021/ic060608u	Supporting Information	13	0	1	0	0	0	0	Figures: (2)_x000D_ Nitrogen Isotherm: No	2	2	TN	TP	TN	TN	TN	TN
10.1021/ic060608u	Supporting Information	14	0	1	1	0	0	0	Figures: (2);(3)_x000D_ Nitrogen Isotherm: No	23	23	TN	TP	TP	TN	TN	TN
10.1021/ic060608u	Supporting Information	15	1	0	0	0	0	0	Figures: (1);(5)_x000D_ Nitrogen Isotherm: Figure S16_x000D_ Compound: L-1_x000D_ Porosity: N/A_x000D_ Hysteresis: Yes_x000D_ Saturation: 1.5 - 2.0 mol/g_x000D_ Position: (0.0, 0.5, 1.0, 0.75)	1	15	TP	TN	TN	TN	FP	TN
10.1021/ic060608u	Main	1	0	0	0	0	0	1	Figures: (6) It does not have figures or have figures than not belong to above class_x000D_ Nitrogen Isotherm: No	6	6	TN	TN	TN	TN	TN	TP
10.1021/ic060608u	Main	2	0	0	0	1	0	0	Figures: (4)_x000D_ Nitrogen Isotherm: No	4	4	TN	TN	TN	TP	TN	TN
10.1021/ic060608u	Main	3	0	0	0	0	0	1	Figures: (5)_x000D_ Nitrogen Isotherm: No	6	5	TN	TN	TN	TN	FP	FN
10.1021/ic060771p	Supporting Information	1	0	1	0	1	0	0	Figures: (2);(4)_x000D_ Nitrogen Isotherm: No	24	24	TN	TP	TN	TP	TN	TN
10.1021/ic060771p	Supporting Information	2	0	1	0	0	0	0	Figures: (2)_x000D_ Nitrogen Isotherm: No	2	2	TN	TP	TN	TN	TN	TN
10.1021/ic060771p	Supporting Information	3	0	0	0	0	0	1	Figures: (6) It does not have figures or have figures than not belong to above class_x000D_ Nitrogen Isotherm: No	6	6	TN	TN	TN	TN	TN	TP
10.1021/ic060771p	Main	1	0	0	0	0	0	1	Figures: (6) It does not have figures or have figures than not belong to above class_x000D_ Nitrogen Isotherm: No	6	6	TN	TN	TN	TN	TN	TP
10.1021/ic060771p	Main	2	0	0	0	0	0	1	Figures: (6) It does not have figures or have figures than not belong to above class_x000D_ Nitrogen Isotherm: No	6	6	TN	TN	TN	TN	TN	TP
10.1021/ic060771p	Main	3	0	0	0	0	0	1	Figures: (6) It does not have figures or have figures than not belong to the above class_x000D_ Nitrogen Isotherm: No	6	6	TN	TN	TN	TN	TN	TP
10.1021/ic060771p	Main	4	0	0	0	1	0	0	Figures: (4) Crystal structure or topology illustration_x000D_ Nitrogen Isotherm: No	4	4	TN	TN	TN	TP	TN	TN
10.1021/ic060771p	Main	5	0	0	0	1	0	0	Figures: [Answer: (4)]_x000D_ Nitrogen Isotherm: No	4	4	TN	TN	TN	TP	TN	TN
10.1021/ic060771p	Main	6	0	0	1	0	0	0	Figures: (3)_x000D_ Nitrogen Isotherm: No	3	3	TN	TN	TP	TN	TN	TN
10.1021/ic062019u	Supporting Information	1	0	0	0	0	0	1	Figures: (6) It does not have figures or have figures than not belong to above class_x000D_ Nitrogen Isotherm: No	6	6	TN	TN	TN	TN	TN	TP
10.1021/ic062019u	Supporting Information	2	0	0	0	0	0	1	Figures: (6) It does not have figures or have figures that do not belong to the above class._x000D_ Nitrogen Isotherm: No	6	6	TN	TN	TN	TN	TN	TP
10.1021/ic062019u	Main	1	0	0	0	0	0	1	Figures: (6) It does not have figures or have figures than not belong to above class_x000D_ Nitrogen Isotherm: No	6	6	TN	TN	TN	TN	TN	TP
10.1021/ic062019u	Main	2	0	0	0	0	0	1	Figures: (6) It does not have figures or have figures than not belong to above class_x000D_ Nitrogen Isotherm: No	6	6	TN	TN	TN	TN	TN	TP
10.1021/ic062019u	Main	3	0	0	0	0	0	1	Figures: (6) It does not have figures or have figures than not belong to above class_x000D_ Nitrogen Isotherm: No	6	6	TN	TN	TN	TN	TN	TP
10.1021/ic062019u	Main	4	0	0	0	1	0	0	Figures: (4);(6)_x000D_ Nitrogen Isotherm: No	4	46	TN	TN	TN	TP	TN	FP
10.1021/ic062019u	Main	5	0	0	0	0	0	1	Figures: (6) It does not have figures or have figures than not belong to above class_x000D_ Nitrogen Isotherm: No	6	6	TN	TN	TN	TN	TN	TP
10.1021/ic062019u	Main	6	0	0	0	0	0	1	Figures: (6) It does not have figures or have figures than not belong to above class_x000D_ Nitrogen Isotherm: No	6	6	TN	TN	TN	TN	TN	TP
10.1021/ic070274o	Supporting Information	1	0	0	1	0	0	0	Figures: (3)_x000D_ Nitrogen Isotherm: No	3	3	TN	TN	TP	TN	TN	TN
10.1021/ic070274o	Main	1	0	0	0	0	0	1	Figures: (6) It does not have figures or have figures than not belong to above class_x000D_ Nitrogen Isotherm: No	6	6	TN	TN	TN	TN	TN	TP
10.1021/ic070274o	Main	2	0	0	0	0	0	1	Figures: (6) It does not have figures or have figures than not belong to above class_x000D_ Nitrogen Isotherm: No	6	6	TN	TN	TN	TN	TN	TP
10.1021/ic070274o	Main	3	0	0	0	0	0	1	Figures: (6) It does not have figures or have figures than not belong to above class_x000D_ Nitrogen Isotherm: No	6	6	TN	TN	TN	TN	TN	TP
10.1021/ic070274o	Main	4	0	0	0	1	0	0	Figures: (4)_x000D_ Nitrogen Isotherm: No	4	4	TN	TN	TN	TP	TN	TN
10.1021/ic070274o	Main	5	0	0	0	1	0	0	Figures: (4)_x000D_ Nitrogen Isotherm: No	4	4	TN	TN	TN	TP	TN	TN
10.1021/ic070274o	Main	6	0	0	0	1	0	0	Figures: (4) Crystal structure or topology illustration_x000D_ Nitrogen Isotherm: No	4	4	TN	TN	TN	TP	TN	TN
10.1021/ic070274o	Main	7	0	0	0	1	0	0	Figures: (4)_x000D_ Nitrogen Isotherm: No	4	4	TN	TN	TN	TP	TN	TN
10.1021/ic070274o	Main	8	0	0	0	1	0	0	Figures: (4) Crystal structure or topology illustration_x000D_ Nitrogen Isotherm: No	4	4	TN	TN	TN	TP	TN	TN
10.1021/ic070274o	Main	9	0	0	0	1	0	0	Figures: (4) Crystal structure or topology illustration_x000D_ Nitrogen Isotherm: No	4	4	TN	TN	TN	TP	TN	TN
10.1021/ic070274o	Main	10	0	0	0	0	0	1	Figures: (3)_x000D_ Nitrogen Isotherm: No	6	3	TN	TN	FP	TN	TN	FN
10.1021/ic100188w	Supporting Information	1	0	0	0	0	0	1	Figures: [Answer: (6) It does not have figures or have figures than not belong to above class]_x000D_ Nitrogen Isotherm: No	6	6	TN	TN	TN	TN	TN	TP
10.1021/ic100188w	Supporting Information	2	0	0	0	0	0	1	Figures: (6) It does not have figures or have figures than not belong to the above class_x000D_ Nitrogen Isotherm: No	6	6	TN	TN	TN	TN	TN	TP
10.1021/ic100188w	Supporting Information	3	0	0	0	1	0	0	Figures: (4)_x000D_ Nitrogen Isotherm: No	4	4	TN	TN	TN	TP	TN	TN
10.1021/ic100188w	Supporting Information	4	0	0	1	0	0	0	Figures: (3)_x000D_ Nitrogen Isotherm: No	3	3	TN	TN	TP	TN	TN	TN
10.1021/ic100188w	Supporting Information	5	0	1	0	0	0	0	Figures: (2)_x000D_ Nitrogen Isotherm: No	2	2	TN	TP	TN	TN	TN	TN
10.1021/ic100188w	Supporting Information	6	0	0	0	0	0	1	Figures: (6) It does not have figures or have figures that not belong to the above class_x000D_ Nitrogen Isotherm: No	6	6	TN	TN	TN	TN	TN	TP
10.1021/ic100188w	Supporting Information	7	0	0	0	0	0	1	Figures: (6) It does not have figures or have figures than not belong to above class_x000D_ Nitrogen Isotherm: No	6	6	TN	TN	TN	TN	TN	TP
10.1021/ic100188w	Main	1	0	0	0	0	0	1	Figures: [Answer: (6) It does not have figures or have figures than not belong to above class]_x000D_ Nitrogen Isotherm: No	6	6	TN	TN	TN	TN	TN	TP
10.1021/ic100188w	Main	2	0	0	0	0	0	1	Figures: (6) It does not have figures or have figures than not belong to above class_x000D_ Nitrogen Isotherm: No	6	6	TN	TN	TN	TN	TN	TP
10.1021/ic100188w	Main	3	0	0	0	1	0	0	Figures: (4)_x000D_ Nitrogen Isotherm: No_x000D_	4	4	TN	TN	TN	TP	TN	TN
10.1021/ic100188w	Main	4	1	0	0	1	1	0	Figures: (1);(4);(5)_x000D_ Nitrogen Isotherm: Figure 3(a) and Figure 3(b)_x000D_ Compound: 1, 2_x000D_ Porosity: N/A_x000D_ Hysteresis: Yes_x000D_ Saturation: 60 - 80 cm^3/g_x000D_ Position: (0.5, 0.4, 1, 0.7)	145	145	TP	TN	TN	TP	TP	TN
10.1021/ic100188w	Main	5	0	0	0	0	0	1	Figures: (6)_x000D_ Nitrogen Isotherm: No	6	6	TN	TN	TN	TN	TN	TP
10.1021/ic100188w	Main	6	0	0	0	0	0	1	Figures: (6) It does not have figures or have figures than not belong to above class_x000D_ Nitrogen Isotherm: No	6	6	TN	TN	TN	TN	TN	TP
10.1021/ic1010083	Supporting Information	1	0	0	0	0	0	1	Figures: (6) It does not have figures or have figures than not belong to above class_x000D_ Nitrogen Isotherm: No	6	6	TN	TN	TN	TN	TN	TP
10.1021/ic1010083	Supporting Information	2	0	0	0	0	0	1	Figures: [Answer: (6)]_x000D_ Nitrogen Isotherm: No	6	6	TN	TN	TN	TN	TN	TP
10.1021/ic1010083	Supporting Information	3	0	0	0	0	1	0	Figures: (5) Other gas sorption isotherm (e.g. water vapor, CO2, H2, CH4, etc.)_x000D_ Nitrogen Isotherm: No	5	5	TN	TN	TN	TN	TP	TN
10.1021/ic1010083	Supporting Information	4	0	0	0	0	1	0	Figures: (5)_x000D_ Nitrogen Isotherm: No	5	5	TN	TN	TN	TN	TP	TN
10.1021/ic1010083	Supporting Information	5	0	0	0	0	1	0	Figures: (5)_x000D_ Nitrogen Isotherm: Figure S4_x000D_ Compound: Activated 1_x000D_ Porosity: N/A_x000D_ Hysteresis: No_x000D_ Saturation: 0.8 - 1.0 mmol/g_x000D_ Position: (0,0.1,1,0.7)	5	5	TN	TN	TN	TN	TP	TN
10.1021/ic1010083	Main	1	0	0	0	0	0	1	Figures: [Answer: (6) It does not have figures or have figures that do not belong to the above class]_x000D_ Nitrogen Isotherm: No	6	6	TN	TN	TN	TN	TN	TP
10.1021/ic1010083	Main	2	0	0	0	0	0	1	Figures: (6) It does not have figures or have figures than not belong to above class_x000D_ Nitrogen Isotherm: No	6	6	TN	TN	TN	TN	TN	TP
10.1021/ic1010083	Main	3	0	1	1	1	0	0	The provided image appears to be from a scientific paper and contains multiple figures related to the study of a metal-organic framework (MOF). However, based on the visual inspection, it does not contain a nitrogen adsorption isotherm graph, which is typically used to characterize the porosity of a material by measuring the amount of nitrogen gas adsorbed at various relative pressures._x000D_ _x…	234	234	TN	TP	TP	TP	TN	TN
10.1021/ic1010083	Main	4	1	0	0	0	1	0	Figures: (1);(5)_x000D_ Nitrogen Isotherm: Figure 3_x000D_ Compound: 1a_x000D_ Porosity: N/A_x000D_ Hysteresis: Yes_x000D_ Saturation: 120 - 140 cm^3/g_x000D_ Position: (0,0.15,0.5,0.35)	15	15	TP	TN	TN	TN	TP	TN
10.1021/ic1010083	Main	5	0	0	0	0	0	1	Figures: (6) It does not have figures or have figures that do not belong to the above class_x000D_ Nitrogen Isotherm: No	6	6	TN	TN	TN	TN	TN	TP
10.1021/ic101789u	Main	1	0	0	0	0	0	1	Figures: [Answer: (6)]_x000D_ Nitrogen Isotherm: No	6	6	TN	TN	TN	TN	TN	TP
10.1021/ic101789u	Main	2	0	0	0	0	0	1	Figures: (6) It does not have figures or have figures that do not belong to the above class._x000D_ Nitrogen Isotherm: No.	6	6	TN	TN	TN	TN	TN	TP
10.1021/ic101789u	Main	3	0	0	0	1	0	0	Figures: (4)_x000D_ Nitrogen Isotherm: No	4	4	TN	TN	TN	TP	TN	TN
10.1021/ic101789u	Main	4	0	0	0	0	1	0	Figures: [Answer: (1);(5)]_x000D_ Nitrogen Isotherm: [Answer: Figure 2(a)]_x000D_ Compound: [Answer: N/A]_x000D_ Porosity: [Answer: Specific surface area of 3065.7 \( m^2/g \)]_x000D_ Hysteresis: [Answer: Yes]_x000D_ Saturation: [Answer: 40 - 50 cm??/g (STP)]_x000D_ Position: [Answer: (0.07, 0.10, 0.52, 0.60)]	5	15	FP	TN	TN	TN	TP	TN
10.1021/ic101789u	Main	5	0	1	0	0	0	0	Figures: (2);(3)_x000D_ Nitrogen Isotherm: Figure 3_x000D_ Compound: 1_x000D_ Porosity: N/A_x000D_ Hysteresis: I do not know_x000D_ Saturation: 200-250 cm3/g_x000D_ Position: (0,0.25,0.5,0.6)	2	23	TN	TP	FP	TN	TN	TN
10.1021/ic102347b	Supporting Information	1	0	1	0	0	0	0	Figures: (2)_x000D_ Nitrogen Isotherm: No	2	2	TN	TP	TN	TN	TN	TN
10.1021/ic102347b	Supporting Information	2	0	1	1	0	0	0	Figures: (2);(3)_x000D_ Nitrogen Isotherm: No	23	23	TN	TP	TP	TN	TN	TN
10.1021/ic102347b	Supporting Information	3	0	0	0	0	1	0	Figures: (5)_x000D_ Nitrogen Isotherm: No	5	5	TN	TN	TN	TN	TP	TN
10.1021/ic102347b	Main	1	0	0	0	1	1	0	Figures: (4);(5)_x000D_ Nitrogen Isotherm: No	45	45	TN	TN	TN	TP	TP	TN
10.1021/ic102347b	Main	2	0	0	0	0	0	1	Figures: (6)_x000D_ Nitrogen Isotherm: No	6	6	TN	TN	TN	TN	TN	TP
10.1021/ic102347b	Main	3	0	0	0	1	1	0	Figures: (4);(5)_x000D_ Nitrogen Isotherm: No_x000D_	45	45	TN	TN	TN	TP	TP	TN
10.1021/ic102347b	Main	4	0	0	0	0	1	0	Figures: (3);(5)_x000D_ Nitrogen Isotherm: Figure 3_x000D_ Compound: C2H2, CO2, CH4_x000D_ Porosity: N/A_x000D_ Hysteresis: I do not know_x000D_ Saturation: I do not know_x000D_ Position: (0,0.6,0.5,0.85)	5	35	TN	TN	FP	TN	TP	TN
10.1021/ic102347b	Main	5	0	0	0	0	0	1	Figures: [Answer: (6)]_x000D_ Nitrogen Isotherm: No	6	6	TN	TN	TN	TN	TN	TP
10.1021/ic200054b	Supporting Information	1	0	0	0	1	0	0	Figures: (4) Crystal structure or topology illustration_x000D_ Nitrogen Isotherm: No	4	4	TN	TN	TN	TP	TN	TN
10.1021/ic200054b	Supporting Information	2	0	0	0	0	0	1	Figures: (6) It does not have figures or have figures than not belong to above class_x000D_ Nitrogen Isotherm: No	6	6	TN	TN	TN	TN	TN	TP
10.1021/ic200054b	Supporting Information	3	0	1	0	0	0	0	Figures: (2);(5)_x000D_ Nitrogen Isotherm: No	2	25	TN	TP	TN	TN	FP	TN
10.1021/ic200054b	Supporting Information	4	0	1	1	0	0	0	Figures: (2);(3)_x000D_ Nitrogen Isotherm: No	23	23	TN	TP	TP	TN	TN	TN
10.1021/ic200054b	Supporting Information	5	0	1	1	0	0	0	Figures: (2);(3)_x000D_ Nitrogen Isotherm: No	23	23	TN	TP	TP	TN	TN	TN
10.1021/ic200054b	Supporting Information	6	0	0	0	0	0	1	Figures: (6) It does not have figures or have figures than not belong to the above class_x000D_ Nitrogen Isotherm: No	6	6	TN	TN	TN	TN	TN	TP
10.1021/ic200054b	Supporting Information	7	0	0	0	0	1	0	Figures: (5);(6)_x000D_ Nitrogen Isotherm: Figure S16_x000D_ Compound: int-MOF-5, MOF-5_x000D_ Porosity: N/A_x000D_ Hysteresis: No_x000D_ Saturation: I do not know_x000D_ Position: (0,0.5,1,0.8)	5	56	TN	TN	TN	TN	TP	FP
10.1021/ic200054b	Supporting Information	8	0	0	0	0	1	0	Figures: (5) Other gas sorption isotherm (e.g. water vapor, CO2, H2, CH4, etc.)_x000D_ Nitrogen Isotherm: No	5	5	TN	TN	TN	TN	TP	TN
10.1021/ic200054b	Supporting Information	9	0	0	0	0	0	1	Figures: (6) It does not have figures or have figures than not belong to above class_x000D_ Nitrogen Isotherm: No	6	6	TN	TN	TN	TN	TN	TP
10.1021/ic200054b	Supporting Information	10	0	0	0	0	0	1	The provided image is a text page displaying a list of references from a literature paper, not a page containing figures or experimental data._x000D_ _x000D_ Therefore, based on the image provided and the instructions for response:_x000D_ _x000D_ Figures: [Answer: (6)]_x000D_ Nitrogen Isotherm: No	6	6	TN	TN	TN	TN	TN	TP
10.1021/ic200054b	Main	1	0	0	0	1	0	0	Figures: (4);(6)_x000D_ Nitrogen Isotherm: No	4	46	TN	TN	TN	TP	TN	FP
10.1021/ic200054b	Main	2	0	1	1	1	0	0	Figures: [Answer: (2);(3);(4)]_x000D_ Nitrogen Isotherm: No	234	234	TN	TP	TP	TP	TN	TN
10.1021/ic200054b	Main	3	0	1	0	1	0	0	Figures: (2);(4)_x000D_ Nitrogen Isotherm: No	24	24	TN	TP	TN	TP	TN	TN
10.1021/ic200054b	Main	4	1	0	0	0	1	0	Figures: (1);(5)_x000D_ Nitrogen Isotherm: Figure 6. Nitrogen (squares) and hydrogen (circles) sorption isotherms of 1 (red) and MOF-5 (blue) at 77 K._x000D_ Compound: 1, MOF-5_x000D_ Porosity: Surface area for compound 1 is mentioned as being much smaller compared to MOF-5 but the exact value is not provided on this page. However, a typical behavior of microporous materials showed a Type I isoth…	15	15	TP	TN	TN	TN	TP	TN
10.1021/ic200054b	Main	5	0	0	0	0	0	1	Figures: [Answer: (6) It does not have figures or have figures than not belong to above class]_x000D_ Nitrogen Isotherm: No	6	6	TN	TN	TN	TN	TN	TP
10.1021/ic200054b	Main	6	0	0	0	0	0	1	Figures: (6) It does not have figures or have figures than not belong to above class_x000D_ Nitrogen Isotherm: No	6	6	TN	TN	TN	TN	TN	TP
10.1021/ic202626c	Main	1	0	0	0	0	0	1	Figures: (6) It does not have figures or have figures than not belong to above class_x000D_ Nitrogen Isotherm: No	6	6	TN	TN	TN	TN	TN	TP
10.1021/ic202626c	Main	2	0	0	0	0	0	1	Figures: (6) It does not have figures or have figures that not belong to the above class_x000D_ Nitrogen Isotherm: No	6	6	TN	TN	TN	TN	TN	TP
10.1021/ic202626c	Main	3	0	0	0	1	0	0	Figures: (4) Crystal structure or topology illustration_x000D_ Nitrogen Isotherm: No	4	4	TN	TN	TN	TP	TN	TN
10.1021/ic202626c	Main	4	0	0	0	0	0	1	Figures: (6) It does not have figures or have figures than not belong to above class_x000D_ Nitrogen Isotherm: No	6	6	TN	TN	TN	TN	TN	TP
10.1021/ic202626c	Main	5	0	0	0	1	0	0	Figures: (4);(5)_x000D_ Nitrogen Isotherm: No	4	45	TN	TN	TN	TP	FP	TN
10.1021/ic202626c	Main	6	0	0	0	0	0	1	Figures: (6) _x000D_ Nitrogen Isotherm: No	6	6	TN	TN	TN	TN	TN	TP
10.1021/ic202626c	Main	7	0	1	0	0	0	0	Figures: (2);(4)_x000D_ Nitrogen Isotherm: No	2	24	TN	TP	TN	FP	TN	TN
10.1021/ic202626c	Main	8	0	0	0	0	0	1	Figures: (6) It does not have figures or have figures than not belong to above class_x000D_ Nitrogen Isotherm: No	6	6	TN	TN	TN	TN	TN	TP
10.1021/ic202626c	Main	9	0	0	0	0	0	1	Figures: [Answer: (6) It does not have figures or have figures than not belong to above class]_x000D_ Nitrogen Isotherm: No	6	6	TN	TN	TN	TN	TN	TP
10.1021/ic202769e	Supporting Information	1	0	0	0	0	0	1	Figures: (6) It does not have figures or have figures than not belong to above class_x000D_ Nitrogen Isotherm: No	6	6	TN	TN	TN	TN	TN	TP
10.1021/ic202769e	Supporting Information	2	0	0	0	0	0	1	Figures: [Answer: (6) It does not have figures or have figures than not belong to above class]_x000D_ Nitrogen Isotherm: No	6	6	TN	TN	TN	TN	TN	TP
10.1021/ic202769e	Supporting Information	3	0	1	1	0	0	0	Figures: (2);(3)_x000D_ Nitrogen Isotherm: No	23	23	TN	TP	TP	TN	TN	TN
10.1021/ic202769e	Supporting Information	4	0	1	1	0	0	0	Figures: (2);(3)_x000D_ Nitrogen Isotherm: No	23	23	TN	TP	TP	TN	TN	TN
10.1021/ic202769e	Supporting Information	5	0	0	0	0	0	1	Figures: (5)_x000D_ Nitrogen Isotherm: Figure S5_x000D_ Compound: CO2, N2_x000D_ Porosity: N/A_x000D_ Hysteresis: No_x000D_ Saturation: 0.4 - 0.5 cm??/g (approximate value for N2)_x000D_ Position: (0,0.2,1,0.9)	6	5	TN	TN	TN	TN	FP	FN
10.1021/ic202769e	Main	1	0	0	0	0	0	1	Figures: (6) It does not have figures or have figures than not belong to above class_x000D_ Nitrogen Isotherm: No	6	6	TN	TN	TN	TN	TN	TP
10.1021/ic202769e	Main	2	1	0	0	1	1	0	Figures: (1);(3);(4);(5)_x000D_ Nitrogen Isotherm: Figure 2_x000D_ Compound: N/A_x000D_ Porosity: N/A_x000D_ Saturation: 20 - 25 cm??/g_x000D_ Position: (0.5,0.6,1,0.8)	145	1345	TP	TN	FP	TP	TP	TN
10.1021/ic202769e	Main	3	0	0	0	1	0	0	Figures: (4);(5)_x000D_ Nitrogen Isotherm: No_x000D_	4	45	TN	TN	TN	TP	FP	TN
10.1021/ic202769e	Main	4	0	0	0	0	0	1	Figures: (6) It does not have figures or have figures than not belong to above class_x000D_ Nitrogen Isotherm: No	6	6	TN	TN	TN	TN	TN	TP
10.1021/ic300665a	Supporting Information	1	0	0	0	1	0	0	Figures: (4)_x000D_ Nitrogen Isotherm: No	4	4	TN	TN	TN	TP	TN	TN
10.1021/ic300665a	Supporting Information	2	0	0	1	1	0	0	Figures: (3);(4)_x000D_ Nitrogen Isotherm: No	34	34	TN	TN	TP	TP	TN	TN
10.1021/ic300665a	Supporting Information	3	0	0	0	0	0	1	Figures: (6) It does not have figures or have figures than not belong to above class_x000D_ Nitrogen Isotherm: No	6	6	TN	TN	TN	TN	TN	TP
10.1021/ic300665a	Supporting Information	4	0	0	0	0	0	1	Figures: (6)_x000D_ Nitrogen Isotherm: No	6	6	TN	TN	TN	TN	TN	TP
10.1021/ic300665a	Supporting Information	5	0	1	0	0	0	0	Figures: (2)_x000D_ Nitrogen Isotherm: No	2	2	TN	TP	TN	TN	TN	TN
10.1021/ic300665a	Supporting Information	6	0	1	0	0	0	0	Figures: (2)_x000D_ Nitrogen Isotherm: No	2	2	TN	TP	TN	TN	TN	TN
10.1021/ic300665a	Supporting Information	7	0	0	1	0	0	0	Figures: (3)_x000D_ Nitrogen Isotherm: No	3	3	TN	TN	TP	TN	TN	TN
10.1021/ic300665a	Supporting Information	8	0	0	1	0	0	0	Figures: (3)_x000D_ Nitrogen Isotherm: No	3	3	TN	TN	TP	TN	TN	TN
10.1021/ic300665a	Supporting Information	9	0	0	1	0	0	0	Figures: (3)_x000D_ Nitrogen Isotherm: No	3	3	TN	TN	TP	TN	TN	TN
10.1021/ic300665a	Supporting Information	10	0	0	0	0	0	1	Figures: (5);(6)_x000D_ Nitrogen Isotherm: No	6	56	TN	TN	TN	TN	FP	FN
10.1021/ic300665a	Supporting Information	11	0	0	0	0	0	1	Figures: (6) It does not have figures or have figures than not belong to above class_x000D_ Nitrogen Isotherm: No	6	6	TN	TN	TN	TN	TN	TP
10.1021/ic300665a	Main	1	0	0	0	1	0	0	Figures: (4);(5)_x000D_ Nitrogen Isotherm: No	4	45	TN	TN	TN	TP	FP	TN
10.1021/ic300665a	Main	2	0	0	0	1	0	0	Figures: (4)_x000D_ Nitrogen Isotherm: No	4	4	TN	TN	TN	TP	TN	TN
10.1021/ic300665a	Main	3	0	0	0	1	0	0	Figures: (4) Crystal structure or topology illustration_x000D_ Nitrogen Isotherm: No	4	4	TN	TN	TN	TP	TN	TN
10.1021/ic300665a	Main	4	0	1	0	0	0	0	Figures: (2);(4)_x000D_ Nitrogen Isotherm: No	2	24	TN	TP	TN	FP	TN	TN
10.1021/ic300665a	Main	5	0	1	0	0	0	0	Figures: (2);(5)_x000D_ Nitrogen Isotherm: Figure 6_x000D_ Compound: N/A_x000D_ Porosity: N/A_x000D_ Hysteresis: I do not know_x000D_ Saturation: 300 - 400 cm3/g_x000D_ Position: (0,0.65,0.5,0.95)	2	25	TN	TP	TN	TN	FP	TN
10.1021/ic300665a	Main	6	0	0	0	0	0	1	Figures: (5)_x000D_ Nitrogen Isotherm: Figure 7_x000D_ Compound: 0.03*rb2+-Ce(II)-MOF (2), 0.52Eu2+-Ce(II)-MOF (3), 0.87Tb3+-Ce(II)-MOF (4), 0.37Tb-0.16Eu2+-Ce(II)-MOF (5), 0.28Tb-0.65Eu2+-Ce(II)-MOF (6), 0.20Tb-0.36Eu2+-Ce(II)-MOF (7)_x000D_ Porosity: N/A_x000D_ Saturation: I do not know_x000D_ Position: (0.01, 0.48, 0.99, 0.80)	6	5	TN	TN	TN	TN	FP	FN
10.1021/ic300665a	Main	7	0	0	0	0	0	1	Figures: [Answer: (6) It does not have figures or have figures than not belong to above class]_x000D_ Nitrogen Isotherm: No	6	6	TN	TN	TN	TN	TN	TP
10.1021/ic3019502	Supporting Information	1	0	0	0	0	0	1	Figures: (6) It does not have figures or have figures than not belong to above class_x000D_ Nitrogen Isotherm: No	6	6	TN	TN	TN	TN	TN	TP
10.1021/ic3019502	Supporting Information	2	0	0	0	0	0	1	Figures: (6) It does not have figures or have figures than not belong to above class_x000D_ Nitrogen Isotherm: No	6	6	TN	TN	TN	TN	TN	TP
10.1021/ic3019502	Supporting Information	3	0	0	0	0	0	1	Figures: [Answer: (6) It does not have figures or have figures than not belong to above class]_x000D_ Nitrogen Isotherm: No	6	6	TN	TN	TN	TN	TN	TP
10.1021/ic3019502	Supporting Information	4	0	0	0	0	0	1	Figures: (6) It does not have figures or have figures than not belong to above class_x000D_ Nitrogen Isotherm: No	6	6	TN	TN	TN	TN	TN	TP
10.1021/ic3019502	Supporting Information	5	0	0	1	0	0	0	Figures: (3);(5)_x000D_ Nitrogen Isotherm: No	3	35	TN	TN	TP	TN	FP	TN
10.1021/ic3019502	Supporting Information	6	0	0	1	0	0	0	Figures: (3)_x000D_ Nitrogen Isotherm: No	3	3	TN	TN	TP	TN	TN	TN
10.1021/ic3019502	Supporting Information	7	0	1	1	0	0	0	Figures: (2);(3)_x000D_ Nitrogen Isotherm: No	23	23	TN	TP	TP	TN	TN	TN
10.1021/ic3019502	Supporting Information	8	0	1	0	0	0	0	Figures: (2)_x000D_ Nitrogen Isotherm: No	2	2	TN	TP	TN	TN	TN	TN
10.1021/ic3019502	Supporting Information	9	0	1	0	0	0	0	Figures: (2)_x000D_ Nitrogen Isotherm: No	2	2	TN	TP	TN	TN	TN	TN
10.1021/ic3019502	Supporting Information	10	0	0	0	0	0	1	Figures: (6) It does not have figures or have figures than not belong to above class_x000D_ Nitrogen Isotherm: No	6	6	TN	TN	TN	TN	TN	TP
10.1021/ic3019502	Supporting Information	11	0	0	0	0	0	1	Figures: (6) It does not have figures or have figures that not belong to the above class_x000D_ Nitrogen Isotherm: No	6	6	TN	TN	TN	TN	TN	TP
10.1021/ic3019502	Supporting Information	12	0	0	0	0	0	1	Figures: (6) It does not have figures or have figures than not belong to above class_x000D_ Nitrogen Isotherm: No	6	6	TN	TN	TN	TN	TN	TP
10.1021/ic3019502	Supporting Information	13	0	0	0	0	0	1	Figures: (6) It does not have figures or have figures than not belong to above class_x000D_ Nitrogen Isotherm: No	6	6	TN	TN	TN	TN	TN	TP
10.1021/ic3019502	Supporting Information	14	0	0	0	0	0	1	Figures: (6) It does not have figures or have figures than not belong to above class_x000D_ Nitrogen Isotherm: No	6	6	TN	TN	TN	TN	TN	TP
10.1021/ic3019502	Supporting Information	15	0	0	0	0	0	1	Figures: (6) It does not have figures or have figures than not belong to above class_x000D_ Nitrogen Isotherm: No	6	6	TN	TN	TN	TN	TN	TP
10.1021/ic3019502	Supporting Information	16	0	0	0	0	0	1	Figures: (5)_x000D_ Nitrogen Isotherm: No	6	5	TN	TN	TN	TN	FP	FN
10.1021/ic3019502	Supporting Information	17	0	0	0	0	0	1	Figures: (6) It does not have figures or have figures than not belong to the above class._x000D_ Nitrogen Isotherm: No	6	6	TN	TN	TN	TN	TN	TP
10.1021/ic3019502	Supporting Information	18	0	0	0	0	0	1	Figures: (6) It does not have figures or have figures than not belong to above class_x000D_ Nitrogen Isotherm: No	6	6	TN	TN	TN	TN	TN	TP
10.1021/ic3019502	Supporting Information	19	0	0	0	0	0	1	Figures: (6) It does not have figures or have figures than not belong to above class_x000D_ Nitrogen Isotherm: No	6	6	TN	TN	TN	TN	TN	TP
10.1021/ic3019502	Supporting Information	20	0	0	0	0	0	1	Figures: (6) It does not have figures or have figures than not belong to above class_x000D_ Nitrogen Isotherm: No	6	6	TN	TN	TN	TN	TN	TP
10.1021/ic3019502	Supporting Information	21	0	0	0	0	0	1	Figures: [Answer: (6) It does not have figures or have figures than not belong to above class]_x000D_ Nitrogen Isotherm: No	6	6	TN	TN	TN	TN	TN	TP
10.1021/ic3019502	Supporting Information	22	0	0	0	0	0	1	Figures: (6) It does not have figures or have figures than not belong to above class_x000D_ Nitrogen Isotherm: No	6	6	TN	TN	TN	TN	TN	TP
10.1021/ic3019502	Main	1	0	0	0	0	0	1	Figures: (6) It does not have figures or have figures than not belong to above class_x000D_ Nitrogen Isotherm: No	6	6	TN	TN	TN	TN	TN	TP
10.1021/ic3019502	Main	2	0	0	0	0	0	1	Figures: (6) It does not have figures or have figures than not belong to above class_x000D_ Nitrogen Isotherm: No	6	6	TN	TN	TN	TN	TN	TP
10.1021/ic3019502	Main	3	0	0	0	1	0	0	Figures: (4)_x000D_ Nitrogen Isotherm: No	4	4	TN	TN	TN	TP	TN	TN
10.1021/ic3019502	Main	4	0	0	0	0	0	1	Figures: (6)_x000D_ Nitrogen Isotherm: No	6	6	TN	TN	TN	TN	TN	TP
10.1021/ic3019502	Main	5	0	0	0	0	0	1	Figures: (6)_x000D_ Nitrogen Isotherm: No	6	6	TN	TN	TN	TN	TN	TP
10.1021/ic3019502	Main	6	0	0	0	0	0	1	Figures: (6) It does not have figures or have figures than not belong to above class_x000D_ Nitrogen Isotherm: No	6	6	TN	TN	TN	TN	TN	TP
10.1021/ic3019502	Main	7	0	0	0	0	0	1	Figures: (6) It does not have figures or have figures that do not belong to the above class._x000D_ Nitrogen Isotherm: No	6	6	TN	TN	TN	TN	TN	TP
10.1021/ic302758g	Supporting Information	1	0	0	0	0	0	1	Figures: (6) It does not have figures or have figures than not belong to above class_x000D_ Nitrogen Isotherm: No	6	6	TN	TN	TN	TN	TN	TP
10.1021/ic302758g	Supporting Information	2	0	0	0	0	0	1	Figures: (6) It does not have figures or have figures than not belong to above class_x000D_ Nitrogen Isotherm: No	6	6	TN	TN	TN	TN	TN	TP
10.1021/ic302758g	Supporting Information	3	0	0	0	1	0	0	Figures: (4)_x000D_ Nitrogen Isotherm: No	4	4	TN	TN	TN	TP	TN	TN
10.1021/ic302758g	Supporting Information	4	0	1	0	1	0	0	Figures: (2);(4)_x000D_ Nitrogen Isotherm: No	24	24	TN	TP	TN	TP	TN	TN
10.1021/ic302758g	Supporting Information	5	0	0	1	0	1	0	Figures: (3);(5)_x000D_ Nitrogen Isotherm: No	35	35	TN	TN	TP	TN	TP	TN
10.1021/ic302758g	Supporting Information	6	0	0	0	0	0	1	Figures: (6) It does not have figures or have figures than not belong to above class_x000D_ Nitrogen Isotherm: No	6	6	TN	TN	TN	TN	TN	TP
10.1021/ic302758g	Supporting Information	7	0	0	0	0	1	0	Figures: (5)_x000D_ Nitrogen Isotherm: No	5	5	TN	TN	TN	TN	TP	TN
10.1021/ic302758g	Supporting Information	8	0	0	0	0	0	1	Figures: (6) It does not have figures or have figures than not belong to above class_x000D_ Nitrogen Isotherm: No	6	6	TN	TN	TN	TN	TN	TP
10.1021/ic302758g	Supporting Information	9	0	0	0	0	0	1	Figures: (6) It does not have figures or have figures than not belong to above class_x000D_ Nitrogen Isotherm: No	6	6	TN	TN	TN	TN	TN	TP
10.1021/ic302758g	Supporting Information	10	0	0	0	0	0	1	Figures: (6) It does not have figures or have figures than not belong to above class_x000D_ Nitrogen Isotherm: No	6	6	TN	TN	TN	TN	TN	TP
10.1021/ic302758g	Supporting Information	11	0	0	0	0	0	1	Figures: (6) It does not have figures or have figures than not belong to above class_x000D_ Nitrogen Isotherm: No	6	6	TN	TN	TN	TN	TN	TP
10.1021/ic302758g	Main	1	0	0	0	1	0	0	Figures: (4);(5)_x000D_ Nitrogen Isotherm: Figure 2(a)_x000D_ Compound: BPDA_x000D_ Porosity: N/A_x000D_ Hysteresis: Yes_x000D_ Saturation: 350 - 400 cm^3/g_x000D_ Position: (0.3, 0.45, 0.85, 0.6)	4	45	TN	TN	TN	TP	FP	TN
10.1021/ic302758g	Main	2	0	0	0	1	0	0	Figures: (4)_x000D_ Nitrogen Isotherm: No	4	4	TN	TN	TN	TP	TN	TN
10.1021/ic302758g	Main	3	1	0	0	1	1	0	Figures: (1);(4);(5)_x000D_ Nitrogen Isotherm: Figure 2(a) and Figure 3(a)_x000D_ Compound: 1_x000D_ Porosity: 345 mmol/g for CO2 and 1.65 mmol/g of N2 at 35 bar; 1.84 mmol/g of CO2 and 0.31 mmol/g of N2 at 298 K and 1 bar_x000D_ Hysteresis: Yes_x000D_ Saturation: 105-120 cm3/g for N2_x000D_ Position: (0,0.15,0.6,0.65) for Figure 2(a); (0.6,0.45,1,0.8) for Figure 3(a)	145	145	TP	TN	TN	TP	TP	TN
10.1021/ic302758g	Main	4	0	0	0	1	0	0	Figures: (4);(5)_x000D_ Nitrogen Isotherm: No	4	45	TN	TN	TN	TP	FP	TN
10.1021/ic302758g	Main	5	0	0	0	0	0	1	Figures: (6) It does not have figures or have figures than not belong to above class_x000D_ Nitrogen Isotherm: No	6	6	TN	TN	TN	TN	TN	TP
10.1021/ic302758g	Main	6	0	0	0	0	0	1	Figures: (6) It does not have figures or have figures than not belong to above class_x000D_ Nitrogen Isotherm: No	6	6	TN	TN	TN	TN	TN	TP
10.1021/ic302758g	Main	7	0	0	0	0	0	1	Figures: (6) It does not have figures or have figures than not belong to above class_x000D_ Nitrogen Isotherm: No	6	6	TN	TN	TN	TN	TN	TP
10.1021/ic400607w	Supporting Information	1	0	0	0	0	0	1	Figures: (6) It does not have figures or have figures than not belong to above class_x000D_ Nitrogen Isotherm: No	6	6	TN	TN	TN	TN	TN	TP
10.1021/ic400607w	Supporting Information	2	0	0	0	0	0	1	Figures: (6) It does not have figures or have figures than not belong to above class_x000D_ Nitrogen Isotherm: No	6	6	TN	TN	TN	TN	TN	TP
10.1021/ic400607w	Supporting Information	3	0	0	0	0	0	1	Figures: (6) It does not have figures or have figures than not belong to above class_x000D_ Nitrogen Isotherm: No	6	6	TN	TN	TN	TN	TN	TP
10.1021/ic400607w	Supporting Information	4	0	0	0	0	0	1	Figures: (6) It does not have figures or have figures that not belong to the above class._x000D_ Nitrogen Isotherm: No	6	6	TN	TN	TN	TN	TN	TP
10.1021/ic400607w	Supporting Information	5	0	0	0	0	0	1	Figures: (6) It does not have figures or have figures than not belong to above class_x000D_ Nitrogen Isotherm: No	6	6	TN	TN	TN	TN	TN	TP
10.1021/ic400607w	Supporting Information	6	0	0	0	0	0	1	Figures: (6) It does not have figures or have figures than not belong to above class_x000D_ Nitrogen Isotherm: No	6	6	TN	TN	TN	TN	TN	TP
10.1021/ic400607w	Supporting Information	7	0	0	1	0	0	0	Figures: (3)_x000D_ Nitrogen Isotherm: Figure S1_x000D_ Compound: as-synthesized, CH???Cl???-exchanged samples of ZTOF-1_x000D_ Porosity: N/A_x000D_ Hysteresis: I do not know_x000D_ Saturation: I do not know_x000D_ Position: (0,0,1,1)	3	3	TN	TN	TP	TN	TN	TN
10.1021/ic400607w	Supporting Information	8	0	0	0	0	1	0	Figures: (5)_x000D_ Nitrogen Isotherm: No	5	5	TN	TN	TN	TN	TP	TN
10.1021/ic400607w	Supporting Information	9	0	0	0	1	0	0	Figures: (4)_x000D_ Nitrogen Isotherm: No	4	4	TN	TN	TN	TP	TN	TN
10.1021/ic400607w	Main	1	0	0	0	0	0	1	Figures: (6) It does not have figures or have figures than not belong to above class_x000D_ Nitrogen Isotherm: No	6	6	TN	TN	TN	TN	TN	TP
10.1021/ic400607w	Main	2	1	1	0	1	1	0	Figures: (1);(2);(4);(5)_x000D_ Nitrogen Isotherm: Figure 3_x000D_ Compound: ZTOF-1_x000D_ Porosity: 2100 m^2/g; 1.25 cm^3/g at 77 K; 273 K volume is not specified_x000D_ Hysteresis: Yes_x000D_ Saturation: 175 - 250 cm^3/g_x000D_ Position: (0.55, 0.45, 1, 0.65)	1245	1245	TP	TP	TN	TP	TP	TN
10.1021/ic400607w	Main	3	0	0	0	0	0	1	Figures: (6) It does not have figures or have figures than not belong to above class_x000D_ Nitrogen Isotherm: No	6	6	TN	TN	TN	TN	TN	TP
10.1021/ic400777c	Supporting Information	1	0	0	0	0	0	1	Figures: (6) It does not have figures or have figures than not belong to above class_x000D_ Nitrogen Isotherm: No	6	6	TN	TN	TN	TN	TN	TP
10.1021/ic400777c	Supporting Information	2	0	0	1	0	0	0	Figures: (3);(4)_x000D_ Nitrogen Isotherm: No	3	34	TN	TN	TP	FP	TN	TN
10.1021/ic400777c	Supporting Information	3	0	1	0	0	0	0	Figures: (2)_x000D_ Nitrogen Isotherm: No	2	2	TN	TP	TN	TN	TN	TN
10.1021/ic400777c	Supporting Information	4	0	0	0	0	0	1	Figures: (6) It does not have figures or have figures than not belong to above class_x000D_ Nitrogen Isotherm: No	6	6	TN	TN	TN	TN	TN	TP
10.1021/ic400777c	Supporting Information	5	0	0	0	0	0	1	Figures: (6) It does not have figures or have figures than not belong to the above class._x000D_ Nitrogen Isotherm: No	6	6	TN	TN	TN	TN	TN	TP
10.1021/ic400777c	Supporting Information	6	0	0	0	0	0	1	Figures: [Answer: (6) It does not have figures or have figures than not belong to above class]_x000D_ Nitrogen Isotherm: No	6	6	TN	TN	TN	TN	TN	TP
10.1021/ic400777c	Supporting Information	7	0	0	0	0	0	1	Figures: (6) It does not have figures or have figures than not belong to above class_x000D_ Nitrogen Isotherm: No	6	6	TN	TN	TN	TN	TN	TP
10.1021/ic400777c	Supporting Information	8	0	0	0	0	0	1	Figures: [Answer: (6) It does not have figures or have figures than not belong to above class]_x000D_ Nitrogen Isotherm: No	6	6	TN	TN	TN	TN	TN	TP
10.1021/ic400777c	Supporting Information	9	0	0	0	0	0	1	Figures: (6) It does not have figures or have figures than not belong to above class_x000D_ Nitrogen Isotherm: No	6	6	TN	TN	TN	TN	TN	TP
10.1021/ic400777c	Main	1	0	0	0	0	0	1	Figures: (6) It does not have figures or have figures that do not belong to the above class_x000D_ Nitrogen Isotherm: No	6	6	TN	TN	TN	TN	TN	TP
10.1021/ic400777c	Main	2	0	0	0	0	0	1	Figures: (6) It does not have figures or have figures than not belong to above class_x000D_ Nitrogen Isotherm: No	6	6	TN	TN	TN	TN	TN	TP
10.1021/ic400777c	Main	3	0	0	0	1	0	0	Figures: (4) Crystal structure or topology illustration_x000D_ Nitrogen Isotherm: No	4	4	TN	TN	TN	TP	TN	TN
10.1021/ic400777c	Main	4	0	0	0	1	0	0	Figures: (4) Crystal structure or topology illustration_x000D_ Nitrogen Isotherm: No	4	4	TN	TN	TN	TP	TN	TN
10.1021/ic400777c	Main	5	0	0	0	1	0	0	Figures: (2);(3);(5)_x000D_ Nitrogen Isotherm: No	4	235	TN	FP	FP	FN	FP	TN
10.1021/ic400777c	Main	6	0	0	0	0	0	1	Figures: (6) It does not have figures or have figures that do not belong to the above class._x000D_ Nitrogen Isotherm: No.	6	6	TN	TN	TN	TN	TN	TP
10.1021/ic400777c	Main	7	0	0	0	0	0	1	Figures: (6) It does not have figures or have figures than not belong to above class_x000D_ Nitrogen Isotherm: No	6	6	TN	TN	TN	TN	TN	TP
10.1021/ic400777c	Main	8	0	0	0	0	0	1	Figures: (6) It does not have figures or have figures than not belong to above class_x000D_ Nitrogen Isotherm: No	6	6	TN	TN	TN	TN	TN	TP
10.1021/ic401157n	Supporting Information	1	0	0	0	0	0	1	Figures: (6) It does not have figures or have figures than not belong to above class_x000D_ Nitrogen Isotherm: No	6	6	TN	TN	TN	TN	TN	TP
10.1021/ic401157n	Supporting Information	2	0	0	0	0	0	1	Figures: (6) It does not have figures or have figures that do not belong to the above class._x000D_ Nitrogen Isotherm: No	6	6	TN	TN	TN	TN	TN	TP
10.1021/ic401157n	Supporting Information	3	0	0	1	0	0	0	Figures: (3)_x000D_ Nitrogen Isotherm: Figure S2_x000D_ Compound: Y-PCP, Ho-PCP, La-PCP_x000D_ Porosity: N/A_x000D_ Hysteresis: Yes_x000D_ Saturation: Approximately -60 to -50 weight%_x000D_ Position: (0,0.35,1,1)	3	3	TN	TN	TP	TN	TN	TN
10.1021/ic401157n	Supporting Information	4	0	0	0	1	0	0	Figures: (4)_x000D_ Nitrogen Isotherm: No	4	4	TN	TN	TN	TP	TN	TN
10.1021/ic401157n	Supporting Information	5	0	0	0	1	0	0	Figures: (4)_x000D_ Nitrogen Isotherm: No	4	4	TN	TN	TN	TP	TN	TN
10.1021/ic401157n	Supporting Information	6	0	0	0	1	0	0	Figures: (4) Crystal structure or topology illustration_x000D_ Nitrogen Isotherm: No	4	4	TN	TN	TN	TP	TN	TN
10.1021/ic401157n	Supporting Information	7	0	0	0	1	0	0	Figures: (4)_x000D_ Nitrogen Isotherm: No	4	4	TN	TN	TN	TP	TN	TN
10.1021/ic401157n	Supporting Information	8	0	0	0	0	1	0	Figures: (5)_x000D_ Nitrogen Isotherm: No	5	5	TN	TN	TN	TN	TP	TN
10.1021/ic401157n	Supporting Information	9	0	0	0	0	1	0	Figures: (5)_x000D_ Nitrogen Isotherm: No	5	5	TN	TN	TN	TN	TP	TN
10.1021/ic401157n	Supporting Information	10	0	1	0	0	0	0	Figures: (2)_x000D_ Nitrogen Isotherm: No	2	2	TN	TP	TN	TN	TN	TN
10.1021/ic401157n	Main	1	0	0	0	0	0	1	Figures: (6) It does not have figures or have figures that not belong to above class_x000D_ Nitrogen Isotherm: No	6	6	TN	TN	TN	TN	TN	TP
10.1021/ic401157n	Main	2	0	0	0	0	0	1	Figures: (6)_x000D_ Nitrogen Isotherm: No	6	6	TN	TN	TN	TN	TN	TP
10.1021/ic401157n	Main	3	0	1	0	1	0	0	Figures: (2);(4)_x000D_ Nitrogen Isotherm: No	24	24	TN	TP	TN	TP	TN	TN
[truncated: 4,242 more rows]

## Sheet: nitrogen-isotherm-summarization
			1	2	3	4	5	6				1	2	3	4	5	6
DOI	Section	Page	Nitrogen Isotherm	PXRD Pattern	TGA Curve	Crystal Structure or Topology	Other Sorption isotherm	None of above	GPT4V Output	Ground Truth*	Output Choices*	Choice 1 Evaluation	Choice 2 Evaluation	Choice 3 Evaluation	Choice 4 Evaluation	Choice 5 Evaluation	Choice 6 Evaluation	Nitrogen Isotherm	Compound	Porosity	Hysteresis	Saturation	Position	Nitrogen Isotherm Evaluation	Compound Evaluation	Porosity Evaluation	Hysteresis Evaluation	Saturation Evaluation	Position Evaluation	P0.1	P0.95	Est ASA	Est SP PV	ID	ASA_m2_cm3	AV_cm3_g	cm3_g	Matched_CSD_of_CoRE	LCD	PLD	LFPD	All_Metals
10.1016/j.inoche.2015.03.028	Supporting Information	8	1	0	0	0	1	0	Figures: (1);(5) Nitrogen Isotherm: Fig. S3 Compound: 1 Porosity: N/A Hysteresis: Yes Saturation: 150-180 cm^3/g Position: (0, 0.1, 1, 0.9)	15	15	TP	TN	TN	TN	TP	TN	Fig. S3	1	N/A	Yes	150-180 cm3/g	(0, 0.1, 1, 0.9)	1	1	1	1	1	1	50	70	200	0.0874872	5	2162.97	0.670435	0.945356	SOZHOG	5.98483	4.5721	5.97294	Cu
10.1021/acs.cgd.5b01686	Main	4	1	0	0	0	1	0	Figures: (1);(5) Nitrogen Isotherm: Figure 3 Compound: CO , N , CH Porosity: N/A Hysteresis: I do not know Saturation: 0 - 120 cm /g Position: (0,0.2,0.5,0.6)	15	15	TP	TN	TN	TN	TP	TN	Figure 3	CO , N , CH	N/A	I do not know	0 - 120 cm /g	(0,0.2,0.5,0.6)	1	0	1	1	1	1	30	80	120	0.0999854	13	1087.15	0.379407	1.28464	WAHFUJ	5.00451	3.93435	5.00451	Cu
10.1021/acs.cgd.6b01265	Supporting Information	10	1	0	0	0	0	0	Figures: (1) Nitrogen Isotherm: Figure S6 (a); Figure S6 (b) Compound: NUU-Bai30, NUU-Bai31 Porosity: N/A Hysteresis: Yes Saturation: - For Figure S6 (a): 400 - 500 cm /g - For Figure S6 (b): 400 - 500 cm /g Position: (0, 0, 1, 1)	1	1	TP	TN	TN	TN	TN	TN	Figure S6 (a); Figure S6 (b)	NUU-Bai30, NUU-Bai31	N/A	Yes	- For Figure S6 (a): 400 - 500 cm /g - For Figure S6 (b): 400 - 500 cm /g	(0, 0, 1, 1)	1	1	1	1	1	1	440	470	1760	0.587414	15	1701.53	0.730388	0.884188	UYICIQ	10.8502	3.77263	10.2666	Cu
10.1021/acs.chemmater.5b03723	Supporting Information	20	1	0	0	0	0	0	Figures: (1)_x000D_ Nitrogen Isotherm: Figure S8_x000D_ Compound: UHM-25-Ala-Boc (11)_x000D_ Porosity: S_BET = 1474 m^2 g^-1; V_micropore = 0.58 cm^3 g^-1_x000D_ Hysteresis: Yes_x000D_ Saturation: 300 - 400 cm^3/g_x000D_ Position: (0,0.5,1,0.85)	1	1	TP	TN	TN	TN	TN	TN	Figure S8	UHM-25-Ala-Boc (11)	SBET 1474 m2 g-1; Vmicropore 0.58 cm3 g-1	Yes	300 - 400 cm3/g	(0,0.5,1,0.85)	1	1	1	1	1	1	350	410	1400	0.512425	16	1915.1	0.900342	0.772596	TAKKEY	13.1182	7.33973	12.8246	Cu
10.1021/acs.chemmater.5b03723	Supporting Information	23	1	0	0	0	0	0	Figures: (1);(2) Nitrogen Isotherm: Figure S12 Compound: UHM-25-Val-Boc (12) Porosity: N/A Hysteresis: Yes Saturation: 600 - 700 cm^3/g Position: (0.0,0.5,1.0,1.0)	1	12	TP	FP	TN	TN	TN	TN	Figure S12	UHM-25-Val-Boc (12)	N/A	Yes	600 - 700 cm3/g	(0.0,0.5,1.0,1.0)	1	1	1	1	1	1
10.1021/acs.chemmater.5b03723	Supporting Information	25	1	0	0	0	0	0	Figures: (1) Nitrogen Isotherm: Figure S14 Compound: UHM-25-Leu-Boc (13) Porosity: S_BET = 1474 m^2 g^-1; V_micropore = 0.68 cm^3 g^-1 Hysteresis: Yes Saturation: 500 - 600 cm^3/g Position: (0, 0.1, 1, 0.7)	1	1	TP	TN	TN	TN	TN	TN	Figure S14	UHM-25-Leu-Boc (13)	SBET 1474 m2 g-1; Vmicropore 0.68 cm3 g-1	Yes	500 - 600 cm3/g	(0, 0.1, 1, 0.7)	1	1	1	1	1	1
10.1021/acs.chemmater.5b03723	Supporting Information	27	1	0	0	0	0	0	Figures: (1) Nitrogen Isotherm: Figure S16 Compound: UHM-25-Ala (14) Porosity: S_BET = 975.7 m^2 g^-1; V_micropore = 0.39 cm^3 g^-1 Hysteresis: No Saturation: 275 - 300 cm^3/g Position: (0,0.2,1,0.8)	1	1	TP	TN	TN	TN	TN	TN	Figure S16	UHM-25-Ala (14)	SBET 975.7 m2 g-1; Vmicropore 0.39 cm3 g-1	No	275 - 300 cm3/g	(0,0.2,1,0.8)	1	1	1	0	1	1
10.1021/acs.chemmater.5b03723	Supporting Information	29	1	0	0	0	0	0	Figures: (1) Nitrogen Isotherm: Figure S18 Compound: UHM-25-Val (15) Porosity: S_BET = 1286 m^2 g^-1 (determined for p/ p0 = 0.011 0.049), V_micropore = 0.51 cm^3 g^-1 (determined at p/p0 = 0.20) Hysteresis: Yes Saturation: 300 - 400 cm^3/g Position: (0,0,1,1)	1	1	TP	TN	TN	TN	TN	TN	Figure S18	UHM-25-Val (15)	SBET 1286 m2 g-1 (determined for p/ p0 0.011 0.049), Vmicropore 0.51 cm3 g-1 (determined at p/p0 0.20)	Yes	300 - 400 cm3/g	(0,0,1,1)	1	1	1	1	1	1
10.1021/acs.chemmater.5b03723	Supporting Information	31	1	0	0	0	0	0	Figures: (1) Nitrogen Isotherm: Figure S20 Compound: UHM-25-Leu (16) Porosity: S_BET = 1351 m^2 g^-1, V_micropore = 0.53 cm^3 g^-1 Hysteresis: No Saturation: 300 - 400 cm^3/g Position: (0,0.1,1,0.7)	1	1	TP	TN	TN	TN	TN	TN	Figure S20	UHM-25-Leu (16)	SBET 1351 m2 g-1, Vmicropore 0.53 cm3 g-1	No	300 - 400 cm3/g	(0,0.1,1,0.7)	1	1	1	0	1	1
10.1021/acs.chemmater.5b03723	Supporting Information	33	1	0	0	0	0	0	Figures: (1) Nitrogen Isotherm: Figure S22 Compound: UHM-25-Pro (17) Porosity: S_BET = 371.5 m^2 g^-1; V_micropore = 0.15 cm^3 g^-1 Hysteresis: Yes Saturation: 90 - 100 cm^3/g Position: (0,0.1,1,0.75)	1	1	TP	TN	TN	TN	TN	TN	Figure S22	UHM-25-Pro (17)	SBET 371.5 m2 g-1; Vmicropore 0.15 cm3 g-1	Yes	90 - 100 cm3/g	(0,0.1,1,0.75)	1	1	1	1	1	1	90	110	360	0.13748	17	2122.45	1.14982	0.645145	TAKKIC	14.2282	7.4356	14.2282	Cu
10.1021/acs.chemmater.5b03723	Supporting Information	36	1	0	0	0	0	0	Figures: (1) Nitrogen Isotherm: Figure S25 Compound: UHM-25-Val-Evans (18) Porosity: SBET = 1454 m^2 g^-1; Vmicropore = 0.56 cm^3 g^-1 Hysteresis: Yes Saturation: 300 - 400 cm^3/g Position: (0.1, 0.4, 0.9, 0.9)	1	1	TP	TN	TN	TN	TN	TN	Figure S25	UHM-25-Val-Evans (18)	SBET 1454 m2 g-1; Vmicropore 0.56 cm3 g-1	Yes	300 - 400 cm3/g	(0.1, 0.4, 0.9, 0.9)	1	1	1	1	1	0
10.1021/acs.chemmater.5b03723	Main	5	1	0	0	1	0	0	Figures: (1);(4) Nitrogen Isotherm: Figure 7 Compound: UHM-2S-Val-Boc Porosity: N/A Hysteresis: Yes Saturation: 700 - 800 cm^3/g Position: (0.1, 0.6, 0.9, 1.0)	14	14	TP	TN	TN	TP	TN	TN	Figure 7	UHM-2S-Val-Boc	N/A	Yes	700 - 800 cm3/g	(0.1, 0.6, 0.9, 1.0)	1	0	1	1	1	1
10.1021/acs.chemmater.6b02817	Supporting Information	19	1	0	0	0	1	0	Figures: (1);(5) Nitrogen Isotherm: Figure S9(a) Compound: Fe-soc-MOF-1a Porosity: N/A Saturation: 300 - 400 cm /g Position: (0,0,0.5,0.5)	15	15	TP	TN	TN	TN	TP	TN	Figure S9(a)	Fe-soc-MOF-1a	N/A	N/A	300 - 400 cm /g	(0,0,0.5,0.5)	1	1	1	1	1	1
10.1021/acs.chemmater.6b02817	Supporting Information	20	1	0	0	0	1	0	Figures: (5) Nitrogen Isotherm: (a) Compound: Fe-sco-MOF-1a Porosity: N/A Hysteresis: Yes Saturation: 500 - 600 cm /g Position: (0,0,0.5,0.45)	15	5	FN	TN	TN	TN	TP	TN	(a)	Fe-sco-MOF-1a	N/A	Yes	500 - 600 cm /g	(0,0,0.5,0.45)	1	1	1	0	1	1	480	560	1920	0.699898	18	1488.72	0.754828	0.897688	IZENOS	10.3988	5.64581	7.91914	Fe
10.1021/acs.chemmater.6b02817	Supporting Information	21	1	0	0	0	1	0	Figures: (1);(5) Nitrogen Isotherm: Figure S11 (a) Compound: Fe-soc-MOF-1b Porosity: N/A Hysteresis: Yes Saturation: 250 - 300 cm3/g Position: (0, 0, 0.5, 0.6)	15	15	TP	TN	TN	TN	TP	TN	Figure S11 (a)	Fe-soc-MOF-1b	N/A	Yes	250 - 300 cm3/g	(0, 0, 0.5, 0.6)	1	1	1	1	1	1
10.1021/acs.chemmater.6b02817	Supporting Information	22	1	0	0	0	1	0	Figures: (1);(5) Nitrogen Isotherm: (a) Compound: Fe-soc-MOF-1b Porosity: N/A Hysteresis: No Saturation: 450 - 500 cm3/g Position: (0,0,0.5,0.6)	15	15	TP	TN	TN	TN	TP	TN	(a)	Fe-soc-MOF-1b	N/A	No	450 - 500 cm3/g	(0,0,0.5,0.6)	1	1	1	1	1	1
10.1021/acs.chemmater.6b02817	Supporting Information	23	1	0	0	0	1	0	Figures: (1);(5) Nitrogen Isotherm: No Compound: N/A Porosity: N/A Hysteresis: N/A Saturation: N/A Position: N/A	15	15	TP	TN	TN	TN	TP	TN	No	N/A	N/A	N/A	N/A	N/A	0	0	1	1	0	0
10.1021/acs.chemmater.6b02817	Supporting Information	24	1	0	0	0	1	0	Figures: (1);(5)_x000D_ Nitrogen Isotherm: Figure S14 (a)_x000D_ Compound: In-soc-MOF-1c_x000D_ Porosity: N/A_x000D_ Hysteresis: Yes_x000D_ Saturation: 300 - 400 cm3/g_x000D_ Position: (0,0,0.5,0.5)	15	15	TP	TN	TN	TN	TP	TN	Figure S14 (a)	In-soc-MOF-1c	N/A	Yes	300 - 400 cm3/g	(0,0,0.5,0.5)	1	1	1	0	1	1
10.1021/acs.inorgchem.5b00096	Supporting Information	25	1	0	0	0	0	0	Figures: (1)_x000D_ Nitrogen Isotherm: Figure S17_x000D_ Compound: 1-(CuCl2)5.8, 1-(CuCl6)8, 1-(CoCl2)5.5, 1-(FeBr2)6.1, 1-(Cr(CO)4)5.6_x000D_ Porosity: N/A_x000D_ Hysteresis: I do not know_x000D_ Saturation: 20 - 30 mmol/g_x000D_ Position: (0,0,1,0.9)	1	1	TP	TN	TN	TN	TN	TN	Figure S17	1-(CuCl2)5.8, 1-(CuCl6)8, 1-(CoCl2)5.5, 1-(FeBr2)6.1, 1-(Cr(CO)4)5.6	N/A	I do not know	20 - 30 mmol/g	(0,0,1,0.9)	1	1	1	1	1	1	170	180	680	0.224967	19	1921.15	0.496481	1.28947	QURNIC	9.37546	3.5659	9.35215	Cu,Zr
10.1021/acs.inorgchem.5b00194	Main	3	1	0	0	1	0	0	Figures: (1);(4);(5) Nitrogen Isotherm: Figure 2 Compound: ZJU-70a Porosity: The surface areas of ZJU-70a are 1791 and 1999 m^2/g, respectively. Its pore volume is 0.76 cm^3/g. The calculated BET surface area for the single-crystal structure is 2509 m^2/g. Hysteresis: Yes Saturation: 400 - 500 cm^3/g Position: (0.55, 0.6, 1, 0.85)	14	145	TP	TN	TN	TP	FP	TN	Figure 2	ZJU-70a	The surface areas of ZJU-70a are 1791 and 1999 m2/g, respectively. Its pore volume is 0.76 cm3/g. The calculated BET surface area for the single-crystal structure is 2509 m2/g.	Yes	400 - 500 cm3/g	(0.55, 0.6, 1, 0.85)	1	1	1	0	1	1	430	460	1720	0.574916	21	2522.95	0.85588	0.823713	DORNAB	8.53834	6.535	8.52358	Cu
10.1021/acs.inorgchem.5b00535	Main	2	1	1	0	1	0	0	Figures: (1);(2);(4)_x000D_ Nitrogen Isotherm: Figure 4_x000D_ Compound: UiO-68-alkyne, UiO-68-triazole-A, UiO-68-triazole-B, UiO-68-triazole-C_x000D_ Porosity: N/A_x000D_ Hysteresis: Yes_x000D_ Saturation: 700 - 800 cm^3/g_x000D_ Position: (0.5,0.4,1,0.7)	124	124	TP	TP	TN	TP	TN	TN	Figure 4	UiO-68-alkyne, UiO-68-triazole-A, UiO-68-triazole-B, UiO-68-triazole-C	N/A	Yes	700 - 800 cm3/g	(0.5,0.4,1,0.7)	1	1	1	1	1	0	590	790	2360	0.987355	22	1804.02	1.25211	0.59819	QUHVEW	17.8828	5.61829	17.8828	Zr
10.1021/acs.inorgchem.5b00561	Main	6	1	0	0	0	1	0	Figures: (1);(5) Nitrogen Isotherm: Figure 6(b) Compound: 273 K CO2, 283 K CO2, 298 K CO2, 273 K CH4, 298 K N2 Porosity: N/A Hysteresis: No Saturation: 65 - 75 cm3/g Position: (0, 0.25, 0.6, 0.55)	15	15	TP	TN	TN	TN	TP	TN	Figure 6(b)	273 K CO2, 283 K CO2, 298 K CO2, 273 K CH4, 298 K N2	N/A	No	65 - 75 cm3/g	(0, 0.25, 0.6, 0.55)	1	0	1	1	0	0
10.1021/acs.inorgchem.5b01023	Main	2	1	0	0	1	1	0	Figures: (1);(4);(3) Nitrogen Isotherm: Figure 3. Gas-sorption isotherms for FIR-28-ht at 77 K; (a) N2; (b) H2. Compound: FIR-28-ht Porosity: N/A Hysteresis: Yes Saturation: 250 - 300 cm3/g Position: (0.5, 0.8, 1, 1)	145	134	TP	TN	FP	TP	FN	TN	Figure 3. Gas-sorption isotherms for FIR-28-ht at 77 K; (a) N2; (b) H2.	FIR-28-ht	N/A	Yes	250 - 300 cm3/g	(0.5, 0.8, 1, 1)	1	1	1	1	1	1	220	250	880	0.312454	24	1555.72	0.659696	0.929822	IGUFOH	12.8128	3.94057	12.8128	Zn
10.1021/acs.inorgchem.5b02108	Supporting Information	7	1	0	1	0	0	0	Figures: (1);(3) Nitrogen Isotherm: Figure S8 Compound: MFM-300(Ga2), MFM-300(Ga1.87Fe0.13) Porosity: N/A Hysteresis: No Saturation: 140 - 160 cm3/g Position: (0, 0.5, 1, 1)	13	13	TP	TN	TP	TN	TN	TN	Figure S8	MFM-300(Ga2), MFM-300(Ga1.87Fe0.13)	N/A	No	140 - 160 cm3/g	(0, 0.5, 1, 1)	1	1	1	0	1	1	120	180	480	0.224967	25	1596.38	0.488296	1.21033	TAKTAD	7.194	7.0599	7.194	Ga
10.1021/acs.inorgchem.5b02316	Main	5	1	1	0	0	1	0	Figures: (1);(2);(5) Nitrogen Isotherm: Figure 4(a) Compound: FUJ-14-NO , FUJ-14-CIO , FUJ-14-BF Porosity: N/A Hysteresis: Yes Saturation: 100 - 120 cm /g Position: (0, 0.15, 0.55, 0.65)	125	125	TP	TP	TN	TN	TP	TN	Figure 4(a)	FUJ-14-NO , FUJ-14-CIO , FUJ-14-BF	N/A	Yes	100 - 120 cm /g	(0, 0.15, 0.55, 0.65)	1	1	1	1	1	1	90	110	360	0.13748	26	2005.01	0.490328	1.34196	ZADRII	10.1207	5.58472	9.70957	Cu
10.1021/acs.inorgchem.6b00081	Supporting Information	9	1	0	0	0	1	0	Figures: (1);(5)_x000D_ Nitrogen Isotherm: Figure S8_x000D_ Compound: 1, 2, 3_x000D_ Porosity: N/A_x000D_ Hysteresis: Yes_x000D_ Saturation: 160 - 180 cm3/g_x000D_ Position: (0, 0, 1, 0.55)	15	15	TP	TN	TN	TN	TP	TN	Figure S8	1, 2, 3	N/A	Yes	160 - 180 cm3/g	(0, 0, 1, 0.55)	1	1	1	1	1	1	140	160	560	0.199971	29	782.38	0.426107	1.16215	ILIMUN01	7.28268	5.80535	7.28268	Ni
10.1021/acs.inorgchem.6b00136	Main	3	1	0	0	0	1	0	Figures: (1);(5) Nitrogen Isotherm: Figure 4 Compound: 1-min, 1-eim, 1-pim, 1-buim Porosity: Surface area values are provided for the compounds: 1-min, 940.26 m^2 g^-1; 1-eim, 871.47 m^2 g^-1; 1-pim, 839.04 m^2 g^-1; 1-buim, 769.67 m^2 g^-1. Hysteresis: Yes Saturation: 280 - 320 cm^3/g Position: (0,0.32,0.54,0.62)	15	15	TP	TN	TN	TN	TP	TN	Figure 4	1-min, 1-eim, 1-pim, 1-buim	Surface area values are provided for the compounds 1-min, 940.26 m2 g-1; 1-eim, 871.47 m2 g-1; 1-pim, 839.04 m2 g-1; 1-buim, 769.67 m2 g-1.	Yes	280 - 320 cm3/g	(0,0.32,0.54,0.62)	1	1	1	1	1	1	340	350	1360	0.437436	30	1340.62	0.494624	1.17665	EKEXUP	7.2744	7.0365	7.27294	Zn
10.1021/acs.inorgchem.6b00276	Supporting Information	38	1	0	0	0	0	0	Figures: (1)_x000D_ Nitrogen Isotherm: Figure S43; Figure S44_x000D_ Compound: Zr-MOF 23 and 24; Zr-MOF 25 and 26_x000D_ Porosity: N/A_x000D_ Hysteresis: Yes_x000D_ Saturation: Figure S43: 300 - 400 cm3/g; Figure S44: 250 - 300 cm3/g_x000D_ Position: (0, 0, 1, 0.55)	1	1	TP	TN	TN	TN	TN	TN	Figure S43; Figure S44	Zr-MOF 23 and 24; Zr-MOF 25 and 26	N/A	Yes	Figure S43 300 - 400 cm3/g; Figure S44 250 - 300 cm3/g	(0, 0, 1, 0.55)	1	1	1	1	1	1	240	390	960	0.487429	31	1982.07	0.945989	0.76132	BENNEQ	14.1246	8.71298	14.1246	Zn,Co
10.1021/acs.inorgchem.6b01211	Supporting Information	13	1	0	0	0	0	0	Figures: (1);(5)_x000D_ Nitrogen Isotherm: Figure S11_x000D_ Compound: Lcu, LcuPRO_x000D_ Porosity: N/A_x000D_ Hysteresis: Yes_x000D_ Saturation: 600 - 650 cm3/g for Lcu; 500 - 550 cm3/g for LcuPRO_x000D_ Position: (0,0.15,1,0.65)	1	15	TP	TN	TN	TN	FP	TN	Figure S11	Lcu, LcuPRO	N/A	Yes	600 - 650 cm3/g for Lcu; 500 - 550 cm3/g for LcuPRO	(0,0.15,1,0.65)	1	1	1	1	1	1	560	620	2240	0.774887	34	2257.22	0.844422	0.822811	OTIHOQ	11.2838	4.52903	11.2838	Cu
10.1021/acs.inorgchem.6b01211	Supporting Information	26	1	0	0	0	0	0	Figures: (1) Nitrogen Isotherm: Figure S36 Compound: LcuPRO Porosity: N/A Hysteresis: Yes Saturation: 6 - 8 cm /g Position: (0.1, 0.4, 0.9, 1)	1	1	TP	TN	TN	TN	TN	TN	Figure S36	LcuPRO	N/A	Yes	6 - 8 cm /g	(0.1, 0.4, 0.9, 1)	1	1	1	1	1	1
10.1021/acs.inorgchem.6b01416	Main	6	1	0	0	0	1	0	Figures: (1);(5) Nitrogen Isotherm: Figure 5. N2 and H2 sorption isotherms of 2a (a) and 4a (b) measured at 77 K. Compound: 2-N2, 2a, 4-N2, 4a Porosity: N/A Hysteresis: Yes Saturation: 2-N2: 60 - 80 cm3/g, 2a: 60 - 80 cm3/g, 4-N2: 300 - 350 cm3/g, 4a: 250 - 300 cm3/g Position: (0,0.77,0.55,1)	15	15	TP	TN	TN	TN	TP	TN	Figure 5. N2 and H2 sorption isotherms of 2a (a) and 4a (b) measured at 77 K.	2-N2, 2a, 4-N2, 4a	N/A	Yes	2-N2 60 - 80 cm3/g, 2a 60 - 80 cm3/g, 4-N2 300 - 350 cm3/g, 4a 250 - 300 cm3/g	(0,0.77,0.55,1)	1	1	1	1	1	1	330	370	1320	0.462432	35	1327.26	0.393035	1.34288	EXAHOC	6.69143	3.5273	6.69143	Cd
10.1021/acs.inorgchem.6b01569	Supporting Information	17	1	0	0	0	0	0	Figures: (1)_x000D_ Nitrogen Isotherm: Figure S10_x000D_ Compound: Compound 1, Compound 2, Compound 3_x000D_ Porosity: N/A_x000D_ Hysteresis: Yes_x000D_ Saturation: 30 - 40 cm3/g_x000D_ Position: (0, 0.2, 1, 0.65)	1	1	TP	TN	TN	TN	TN	TN	Figure S10	Compound 1, Compound 2, Compound 3	N/A	Yes	30 - 40 cm3/g	(0, 0.2, 1, 0.65)	1	1	1	1	1	1	0	10	0	0.0124982	36	868.696	0.457394	1.11326	EMAMIQ	6.29847	5.43889	6.29847	Ni
10.1021/acs.inorgchem.6b01569	Main	6	1	0	0	0	1	0	Figures: (1);(5) Nitrogen Isotherm: Figure 6 (a) Compound: 2, 3 Porosity: N/A Hysteresis: Yes Saturation: 0.05 - 0.15 cm3/g Position: (0.05,0.4,0.55,0.8)	15	15	TP	TN	TN	TN	TP	TN	Figure 6 (a)	2, 3	N/A	Yes	0.05 - 0.15 cm3/g	(0.05,0.4,0.55,0.8)	1	1	1	0	0	0
10.1021/acs.inorgchem.6b02407	Main	3	1	0	0	0	1	0	Figures: (1);(5)_x000D_ Nitrogen Isotherm: Figure 3a_x000D_ Compound: 2a, 2b_x000D_ Porosity: N/A_x000D_ Hysteresis: Yes_x000D_ Saturation: 350 - 400 cm3/g_x000D_ Position: (0,0.1,0.5,0.5)	15	15	TP	TN	TN	TN	TP	TN	Figure 3a	2a, 2b	N/A	Yes	350 - 400 cm3/g	(0,0.1,0.5,0.5)	1	0	1	0	0	1	0	0	0	0	39	1617.2	0.500411	1.12188	KATTUX	6.24791	4.32537	6.22758	Zn,Li
10.1021/acs.inorgchem.6b02696	Main	3	1	0	0	0	0	0	Figures: (1);(3);(5) Nitrogen Isotherm: Figure 4. N2 sorption isotherms (a) adsorption, (b) desorption Compound: 1 Porosity: N/A Hysteresis: Yes Saturation: 60 - 70 cm^3/g Position: (0, 0.45, 0.5, 0.7)	1	135	TP	TN	FP	TN	FP	TN	Figure 4. N2 sorption isotherms (a) adsorption, (b) desorption	1	N/A	Yes	60 - 70 cm3/g	(0, 0.45, 0.5, 0.7)	1	1	1		1	1	70	70	280	0.0874872	42	2183.39	0.75689	0.908718	JAMTEZ	12.1312	5.0609	12.1281	Zn
10.1021/cg100357q	Main	5	1	1	1	0	1	0	Figures: (1);(2);(3);(5)_x000D_ Nitrogen Isotherm: Figure 7_x000D_ Compound: 1a_x000D_ Porosity: Surface area of 1a are 710 m^2 g^???1 and N2 sorption, 0.310 cm^3 g^???1; Langmuir surface area is 820 m^2 g^???1_x000D_ Hysteresis: Yes_x000D_ Saturation: 0.6 - 0.8 cm^3/g STP_x000D_ Position: (0,0.2,0.5,0.5)	1235	1235	TP	TP	TP	TN	TP	TN	Figure 7	1a	Surface area of 1a are 710 m2 g1 and N2 sorption, 0.310 cm3 g1; Langmuir surface area is 820 m2 g1	Yes	0.6 - 0.8 cm3/g STP	(0,0.2,0.5,0.5)	1	1	1	1	0	1	180	200	720	0.249963	47	1032.04	0.392254	1.25786	QUTHAP	5.69388	4.40862	5.69388	Zn
10.1021/cg301577a	Supporting Information	6	1	0	0	0	0	0	Figures: (1) Nitrogen Isotherm: Figure S3 Compound: NJU-Bai6 Porosity: N/A Saturation: 300 - 350 cm3/g Position: (0, 0, 1, 0.5)	1	1	TP	TN	TN	TN	TN	TN	Figure S3	NJU-Bai6	N/A	N/A	300 - 350 cm3/g	(0, 0, 1, 0.5)	1	1	1	0	1	1	270	370	1080	0.462432	55	2128.96	1.38987	0.563648	XICKOL	13.7962	7.99146	13.4748	Cu
10.1021/cg301577a	Main	2	1	0	0	1	1	0	Figures: (1);(4);(5) Nitrogen Isotherm: Figure 2 Compound: NJU-Bai6 Porosity: N/A Hysteresis: Yes Saturation: 15 - 20 cm3/g Position: (0.5, 0.3, 1, 0.8)	145	145	TP	TN	TN	TP	TP	TN	Figure 2	NJU-Bai6	N/A	Yes	15 - 20 cm3/g	(0.5, 0.3, 1, 0.8)	1	1	1	0	0	0
10.1021/cg400449c	Supporting Information	9	1	0	0	0	1	0	Figures: (1);(5)_x000D_ Nitrogen Isotherm: Fig. S3_x000D_ Compound: N/A_x000D_ Porosity: N/A_x000D_ Hysteresis: No_x000D_ Saturation: 600 - 800 cm^3/g_x000D_ Position: (0.05, 0.45, 0.95, 0.7)	15	15	TP	TN	TN	TN	TP	TN	Fig. S3	N/A	N/A	No	600 - 800 cm3/g	(0.05, 0.45, 0.95, 0.7)	1	0	1	1	1	1	690	700	2760	0.874872	57	2346.54	1.13157	0.667569	KIRFOI	12.6579	7.41339	12.4371	Cu
10.1021/cg500033b	Supporting Information	15	1	0	0	0	1	0	Figures: (1);(5)_x000D_ Nitrogen Isotherm: Figure S9_x000D_ Compound: TMU-4, TMU-5_x000D_ Porosity: N/A_x000D_ Hysteresis: I do not know_x000D_ Saturation: 1.2 - 1.4 cm??/g_x000D_ Position: (0,0.1,0.65,0.5)	15	15	TP	TN	TN	TN	TP	TN	Figure S9	TMU-4, TMU-5	N/A	I do not know	1.2 - 1.4 cm/g	(0,0.1,0.65,0.5)	1	1	1	1	1	1
10.1021/cg500091k	Main	1	1	0	0	1	1	0	Figures: (1);(4);(5)_x000D_ Nitrogen Isotherm: Figure on the top right_x000D_ Compound: JLU-Liu3, JLU-Liu4_x000D_ Porosity: N/A_x000D_ Hysteresis: Yes_x000D_ Saturation: 300 - 400 cm^3/g_x000D_ Position: (0.5, 0, 1, 0.4)	145	145	TP	TN	TN	TP	TP	TN	Figure on the top right	JLU-Liu3, JLU-Liu4	N/A	Yes	300 - 400 cm3/g	(0.5, 0, 1, 0.4)	1	1	1	1	1	1
10.1021/cg500091k	Main	4	1	0	0	0	1	0	Figures: (1);(3);(5)_x000D_ Nitrogen Isotherm: Figure 3(a)_x000D_ Compound: JLU-Liu3_x000D_ Porosity: N/A_x000D_ Hysteresis: Yes_x000D_ Saturation: 250 - 300 cm3/g_x000D_ Position: (0.6,0.45,1,0.7)	15	135	TP	TN	FP	TN	TP	TN	Figure 3(a)	JLU-Liu3	N/A	Yes	250 - 300 cm3/g	(0.6,0.45,1,0.7)	1	1	1	1	1	1	0	300	0	0.374945	64	2289.08	0.70873	0.930114	XOLSUO	7.03754	5.53828	7.03754	Co
10.1021/cg500121f	Main	2	1	0	0	1	1	0	Figures: (1);(4);(5)_x000D_ Nitrogen Isotherm: Figure 3_x000D_ Compound: 1-N2, 2-N2_x000D_ Porosity: 737 m^2/g, the Brunauer???Emmett???Teller (BET) surface area of 658 and 552 m2 g-1, respectively._x000D_ Hysteresis: Yes_x000D_ Saturation: 200 - 250 cm3/g_x000D_ Position: (0.6,0.6,1,0.95)	145	145	TP	TN	TN	TP	TP	TN	Figure 3	1-N2, 2-N2	737 m2/g, the BrunauerEmmettTeller (BET) surface area of 658 and 552 m2 g-1, respectively.	Yes	200 - 250 cm3/g	(0.6,0.6,1,0.95)	1	1	1	1	1	1	190	230	760	0.287458	65	1031.61	0.470517	1.18083	FODJAL	4.92521	3.49647	4.87249	Co
10.1021/cg500149s	Supporting Information	12	1	0	0	0	1	0	Figures: (1);(5)_x000D_ Nitrogen Isotherm: Figure S25; Figure S26_x000D_ Compound: Compound 3; Compound 4_x000D_ Porosity: N/A_x000D_ Saturation: Figure S25: 3 - 3.5 cm^3/g; Figure S26: 6 - 7 cm^3/g_x000D_ Position: (0,0,1,0.6)	15	15	TP	TN	TN	TN	TP	TN	Figure S25; Figure S26	Compound 3; Compound 4	N/A	N/A	Figure S25 3 - 3.5 cm3/g; Figure S26 6 - 7 cm3/g	(0,0,1,0.6)	1	1	1	0	1	0
10.1021/cg500149s	Main	9	1	0	0	0	1	0	Figures: (1);(5)_x000D_ Nitrogen Isotherm: Figure 6, Figure 7_x000D_ Compound: Compound 1 (from Figure 6), Compound 2 (from Figure 7)_x000D_ Porosity: N/A_x000D_ Saturation: Figure 6: 60 - 70 cm^3/g, Figure 7: 40 - 50 cm^3/g_x000D_ Position: (0,0.2,0.5,0.65) for Figure 6 and its description, (0.5,0.2,1,0.65) for Figure 7 and its description.	15	15	TP	TN	TN	TN	TP	TN	Figure 6, Figure 7	Compound 1 (from Figure 6), Compound 2 (from Figure 7)	N/A	N/A	Figure 6 60 - 70 cm3/g, Figure 7 40 - 50 cm3/g	(0,0.2,0.5,0.65) for Figure 6 and its description, (0.5,0.2,1,0.65) for Figure 7 and its description.	1	1	1	1	0	1	0	10	0	0.0124982	66	662.205	0.345627	1.28231	FODCOS	5.58191	4.61814	5.576	Cu
10.1021/cg5008236	Supporting Information	10	1	0	0	0	0	0	Figures: (1)_x000D_ Nitrogen Isotherm: Figure S8; Figure S9_x000D_ Compound: N/A_x000D_ Porosity: N/A_x000D_ Hysteresis: Yes_x000D_ Saturation: Figure S8: 60 - 70 cm3/g; Figure S9: 80 - 90 cm3/g_x000D_ Position: (0,0,1,0.5); (0.5,0,1,1)	1	1	TP	TN	TN	TN	TN	TN	Figure S8; Figure S9	N/A	N/A	Yes	Figure S8 60 - 70 cm3/g; Figure S9 80 - 90 cm3/g	(0,0,1,0.5); (0.5,0,1,1)	1	0	1	1	0	1	0	10	0	0.0124982	69	1390.47	0.580609	1.01239	YOTREG	12.4986	8.5832	12.4986	Fe
10.1021/cg501141m	Main	7	1	0	0	0	1	0	Figures: (1);(5)_x000D_ Nitrogen Isotherm: Figure 6_x000D_ Compound: Co/INA_x000D_ Porosity: BET area was found to be 910 m^2 g^???1; P/P0 = 0.99, pore volume is 0.39 cm^3 g^???1_x000D_ Hysteresis: Yes_x000D_ Saturation: 200 - 250 cm^3/g_x000D_ Position: (0.05,0.6,0.55,0.85)	15	15	TP	TN	TN	TN	TP	TN	Figure 6	Co/INA	BET area was found to be 910 m2 g1; P/P0 0.99, pore volume is 0.39 cm3 g1	Yes	200 - 250 cm3/g	(0.05,0.6,0.55,0.85)	1	1	1	1	1	1	220	250	880	0.312454	73	1469.53	0.596137	0.994067	BOWDOI	7.16379	4.82619	7.11311	Co
10.1021/cg501332u	Main	4	1	0	0	0	1	0	Figures: (1);(2);(5)_x000D_ Nitrogen Isotherm: Figure 3. (a) and (b)_x000D_ Compound: 1', 2'_x000D_ Porosity: Emmett???Teller (BET) surface areas of 1 and 2 are similar, which are estimated as 472 m^2??g^???1 for 1 and 488 m^2??g^???1 for 2 from the N2 adsorption isotherms. The H2 sorption capacities of 1 and 2 reach 193 cm^3??g^???1 (0.92 wt %) and 170 cm^3??g^???1 (0.99 wt %), respectively, at …	15	125	TP	FP	TN	TN	TP	TN	Figure 3. (a) and (b)	1, 2	EmmettTeller (BET) surface areas of 1 and 2 are similar, which are estimated as 472 m2g1 for 1 and 488 m2g1 for 2 from the N2 adsorption isotherms. The H2 sorption capacities of 1 and 2 reach 193 cm3g1 (0.92 wt ) and 170 cm3g1 (0.99 wt ), respectively, at 1 bar and 77 K (Figure S6, Supporting Information).	Yes	140 - 150 cm3/g	(0.05, 0.4, 0.5, 0.7)	1	1	1	1	1	1	160	170	640	0.212469	78	1051.25	0.416062	1.23684	YOYZAP	6.1572	4.57393	6.1572	Cu,Co
10.1021/cg901128k	Main	6	1	1	0	0	1	0	Figures: (1);(2);(5)_x000D_ Nitrogen Isotherm: Figure 7(a)_x000D_ Compound: N2 ads at 77K, N2 des at 77K_x000D_ Porosity: N/A_x000D_ Hysteresis: Yes_x000D_ Saturation: 0.2 - 0.4 cm^3/g_x000D_ Position: (0.05,0.45,0.5,0.9)	125	125	TP	TP	TN	TN	TP	TN	Figure 7(a)	N2 ads at 77K, N2 des at 77K	N/A	Yes	0.2 - 0.4 cm3/g	(0.05,0.45,0.5,0.9)	1	0	1	1	0	1	40	50	160	0.0624909	90	389.052	0.222684	1.86722	PURTEC	5.1054	4.19275	5.1054	Cu
10.1021/cg901312t	Main	3	1	0	0	1	0	0	Figures: (1);(4)_x000D_ Nitrogen Isotherm: Figure 4_x000D_ Compound: N/A_x000D_ Porosity: N/A_x000D_ Saturation: 100-105 cm^3/g_x000D_ Position: (0,0.25,0.5,0.75)	14	14	TP	TN	TN	TP	TN	TN	Figure 4	N/A	N/A	N/A	100-105 cm3/g	(0,0.25,0.5,0.75)	1	1	1	0	1	1	100	110	400	0.13748	91	2258.1	1.21183	0.630454	QUTYOU	15.5483	7.92817	14.8518	Zn
10.1021/cm500700z	Main	5	1	0	0	1	0	0	Figures: (1);(4);(5)_x000D_ Nitrogen Isotherm: Figure 7_x000D_ Compound: N/A_x000D_ Porosity: "A structure solution from X-ray single-crystal diffraction studies was not feasible in this case due to the polycrystalline nature of this material. Alternative ways to solve the crystal structure are currently being explored. Significant insights into the properties of 5 were provided by the PXRD and T…	14	145	TP	TN	TN	TP	FP	TN	Figure 7	N/A	A structure solution from X-ray single-crystal diffraction studies was not feasible in this case due to the polycrystalline nature of this material. Alternative ways to solve the crystal structure are currently being explored. Significant insights into the properties of 5 were provided by the PXRD and TGA analyses. The PXRD pattern showed several peaks in the signature low 2-theta region, indicat…	Yes	250 - 300 cm3/g	(0.5,0.65,1,1)	1	0	0	1	1	1	250	280	1000	0.349949	95	2471.95	0.722217	0.925761	KUNSET	6.28804	4.63482	6.27649	Eu
10.1021/cm503311x	Supporting Information	7	1	0	0	0	0	0	Figures: (1);(5)_x000D_ Nitrogen Isotherm: Figure S16_x000D_ Compound: mono-Ip-[AlF(bdc)]_x000D_ Porosity: N/A_x000D_ Hysteresis: Yes_x000D_ Saturation: 300 - 400 cm^3/g_x000D_ Position: (0, 0.1, 1, 0.6)	1	15	TP	TN	TN	TN	FP	TN	Figure S16	mono-Ip-[AlF(bdc)]	N/A	Yes	300 - 400 cm3/g	(0, 0.1, 1, 0.6)	1	1	1	1	1	1	280	310	1120	0.387443	105	1593.91	0.629635	0.965639	KUNTAQ	7.0434	6.64625	7.0434	Al
10.1021/cm901983a	Supporting Information	11	1	0	0	0	0	0	Figures: (1)_x000D_ Nitrogen Isotherm: Figure S6_x000D_ Compound: MIL-100 (Al)_x000D_ Porosity: The measured BET surface area is 2152(39) m^2??g^-1 with a micropore volume of 0.82 cm^3??g^-1 and assuming a monolayer coverage by nitrogen the Langmuir surface area is 2919(44) m^2??g^-1._x000D_ Hysteresis: No_x000D_ Saturation: 500 - 600 cm^3/g_x000D_ Position: (0, 0, 1, 0.6)	1	1	TP	TN	TN	TN	TN	TN	Figure S6	MIL-100 (Al)	The measured BET surface area is 2152(39) m2g-1 with a micropore volume of 0.82 cm3g-1 and assuming a monolayer coverage by nitrogen the Langmuir surface area is 2919(44) m2g-1.	No	500 - 600 cm3/g	(0, 0, 1, 0.6)	1	1	1	1	1	1	520	630	2080	0.787385	110	1349.52	1.18743	0.630774	BUSPIP	27.7973	11.161	27.796	Si
10.1021/ic060608u	Supporting Information	15	1	0	0	0	0	0	Figures: (1);(5)_x000D_ Nitrogen Isotherm: Figure S16_x000D_ Compound: L-1_x000D_ Porosity: N/A_x000D_ Hysteresis: Yes_x000D_ Saturation: 1.5 - 2.0 mol/g_x000D_ Position: (0.0, 0.5, 1.0, 0.75)	1	15	TP	TN	TN	TN	FP	TN	Figure S16	L-1	N/A	Yes	1.5 - 2.0 mol/g	(0.0, 0.5, 1.0, 0.75)	1	0	1	1	1	1	0	20	0	0.0249963	117	688.664	0.341845	1.52818	NELTUU	4.58785	3.57723	4.32835	Zn
10.1021/ic100188w	Main	4	1	0	0	1	1	0	Figures: (1);(4);(5)_x000D_ Nitrogen Isotherm: Figure 3(a) and Figure 3(b)_x000D_ Compound: 1, 2_x000D_ Porosity: N/A_x000D_ Hysteresis: Yes_x000D_ Saturation: 60 - 80 cm^3/g_x000D_ Position: (0.5, 0.4, 1, 0.7)	145	145	TP	TN	TN	TP	TP	TN	Figure 3(a) and Figure 3(b)	1, 2	N/A	Yes	60 - 80 cm3/g	(0.5, 0.4, 1, 0.7)	1	1	1	0	0	0	100	100	400	0.124982	121	791.307	0.199054	1.88994	NUZCER	7.49679	5.33186	7.49523	Ni
10.1021/ic1010083	Main	4	1	0	0	0	1	0	Figures: (1);(5)_x000D_ Nitrogen Isotherm: Figure 3_x000D_ Compound: 1a_x000D_ Porosity: N/A_x000D_ Hysteresis: Yes_x000D_ Saturation: 120 - 140 cm^3/g_x000D_ Position: (0,0.15,0.5,0.35)	15	15	TP	TN	TN	TN	TP	TN	Figure 3	1a	N/A	Yes	120 - 140 cm3/g	(0,0.15,0.5,0.35)	1	1	1	1	1	1	130	140	520	0.174974	122	1302.13	0.405305	1.29976	FUSTUK	8.73889	4.47796	8.73889	Zn
10.1021/ic200054b	Main	4	1	0	0	0	1	0	Figures: (1);(5)_x000D_ Nitrogen Isotherm: Figure 6. Nitrogen (squares) and hydrogen (circles) sorption isotherms of 1 (red) and MOF-5 (blue) at 77 K._x000D_ Compound: 1, MOF-5_x000D_ Porosity: Surface area for compound 1 is mentioned as being much smaller compared to MOF-5 but the exact value is not provided on this page. However, a typical behavior of microporous materials showed a Type I isoth…	15	15	TP	TN	TN	TN	TP	TN	Figure 6. Nitrogen (squares) and hydrogen (circles) sorption isotherms of 1 (red) and MOF-5 (blue) at 77 K.	1, MOF-5	Surface area for compound 1 is mentioned as being much smaller compared to MOF-5 but the exact value is not provided on this page. However, a typical behavior of microporous materials showed a Type I isotherm with nitrogen sorption isotherms of 1130 m2/g, which is for MOF-5. Also, the nitrogen uptake of MOF-5 at 77K is about 400 cm3/g.	Yes	300 - 400 cm3/g for MOF-5; I do not know for compound 1.	(0, 0.22, 0.5, 0.75) for Figure 6 and its caption.	1	1	1	1	1	0	280	300	1120	0.374945	126	1076.81	0.385672	1.4629	UXELIT	7.46774	3.60854	7.46774	Zn
10.1021/ic202769e	Main	2	1	0	0	1	1	0	Figures: (1);(3);(4);(5)_x000D_ Nitrogen Isotherm: Figure 2_x000D_ Compound: N/A_x000D_ Porosity: N/A_x000D_ Saturation: 20 - 25 cm??/g_x000D_ Position: (0.5,0.6,1,0.8)	145	1345	TP	TN	FP	TP	TP	TN	Figure 2	N/A	N/A	N/A	20 - 25 cm/g	(0.5,0.6,1,0.8)	1	0	1	1	0	1	0	10	0	0.0124982	128	707.209	0.306946	1.47192	GAWTOP	5.53082	4.05182	5.47464	Co
10.1021/ic302758g	Main	3	1	0	0	1	1	0	Figures: (1);(4);(5)_x000D_ Nitrogen Isotherm: Figure 2(a) and Figure 3(a)_x000D_ Compound: 1_x000D_ Porosity: 345 mmol/g for CO2 and 1.65 mmol/g of N2 at 35 bar; 1.84 mmol/g of CO2 and 0.31 mmol/g of N2 at 298 K and 1 bar_x000D_ Hysteresis: Yes_x000D_ Saturation: 105-120 cm3/g for N2_x000D_ Position: (0,0.15,0.6,0.65) for Figure 2(a); (0.6,0.45,1,0.8) for Figure 3(a)	145	145	TP	TN	TN	TP	TP	TN	Figure 2(a) and Figure 3(a)	1	345 mmol/g for CO2 and 1.65 mmol/g of N2 at 35 bar; 1.84 mmol/g of CO2 and 0.31 mmol/g of N2 at 298 K and 1 bar	Yes	105-120 cm3/g for N2	(0,0.15,0.6,0.65) for Figure 2(a); (0.6,0.45,1,0.8) for Figure 3(a)	0	1	0	1	0	0	10	20	40	0.0249963	131	626.355	0.351021	1.3042	PIBLUJ	5.94758	3.52279	5.92412	Zn
10.1021/ic400607w	Main	2	1	1	0	1	1	0	Figures: (1);(2);(4);(5)_x000D_ Nitrogen Isotherm: Figure 3_x000D_ Compound: ZTOF-1_x000D_ Porosity: 2100 m^2/g; 1.25 cm^3/g at 77 K; 273 K volume is not specified_x000D_ Hysteresis: Yes_x000D_ Saturation: 175 - 250 cm^3/g_x000D_ Position: (0.55, 0.45, 1, 0.65)	1245	1245	TP	TP	TN	TP	TP	TN	Figure 3	ZTOF-1	2100 m2/g; 1.25 cm3/g at 77 K; 273 K volume is not specified	Yes	175 - 250 cm3/g	(0.55, 0.45, 1, 0.65)	1	1	1	1	1	1	260	290	1040	0.362447	132	1912.85	0.579905	1.08776	LIJFUH	8.03748	6.22623	7.97705	Zn,Si
10.1021/ic402058f	Supporting Information	32	1	0	0	0	1	0	Figures: (5)_x000D_ Nitrogen Isotherm: Figure S23; N2_x000D_ Compound: 1_x000D_ Porosity: N/A_x000D_ Hysteresis: No_x000D_ Saturation: 0 - 5 cm^3/g_x000D_ Position: (0, 0.4, 1, 1)	15	5	FN	TN	TN	TN	TP	TN	Figure S23; N2	1	N/A	No	0 - 5 cm3/g	(0, 0.4, 1, 1)	1	1	1	1	1	1	0	0	0	0	136	565.476	0.367586	1.37492	PIQPUC	5.68988	4.36716	5.68491	Cd
10.1021/ic5005374	Supporting Information	15	1	0	1	0	0	0	Figures: (1);(3)_x000D_ Nitrogen Isotherm: Figure S11_x000D_ Compound: SCD activated 438-MOF_x000D_ Porosity: N/A_x000D_ Hysteresis: Yes_x000D_ Saturation: 600 - 700 cm3/g_x000D_ Position: (0, 0.1, 0.9, 0.5)	13	13	TP	TN	TP	TN	TN	TN	Figure S11	SCD activated 438-MOF	N/A	Yes	600 - 700 cm3/g	(0, 0.1, 0.9, 0.5)	1	1	1	1	1	1	240	700	960	0.874872	149	1871.88	1.31572	0.624448	QOKTUH	21.713	8.12819	21.713	Dy
10.1021/ic5008457	Main	5	1	0	0	0	1	0	Figures: (1);(5)_x000D_ Nitrogen Isotherm: Figure 5_x000D_ Compound: Ie_x000D_ Porosity: N/A_x000D_ Hysteresis: Yes_x000D_ Saturation: 30 - 40 cm3/g_x000D_ Position: (0,0.5,0.5,0.85)	15	15	TP	TN	TN	TN	TP	TN	Figure 5	Ie	N/A	Yes	30 - 40 cm3/g	(0,0.5,0.5,0.85)	1	0	1	1	1	1	140	170	560	0.212469	150	2209.73	0.687685	0.950435	QONKOV	5.97545	4.80817	5.79843	Cu
10.1021/ic501801f	Main	5	1	0	0	0	1	0	Figures: (1);(5)_x000D_ Nitrogen Isotherm: Figure 5_x000D_ Compound: 1, 2_x000D_ Porosity: N/A_x000D_ Hysteresis: Yes_x000D_ Saturation: 150 - 175 cm^3/g_x000D_ Position: (0,0.8,1,1)	15	15	TP	TN	TN	TN	TP	TN	Figure 5	1, 2	N/A	Yes	150 - 175 cm3/g	(0,0.8,1,1)	1	1	1	1	1	1	0	0	0	0	155	1772.69	0.649118	0.921866	XUNVEJ	7.62911	3.95603	7.62911	Cd
10.1021/ic501801f	Main	6	1	0	0	0	1	0	Figures: (1);(5)_x000D_ Nitrogen Isotherm: Figure 2, A_x000D_ Compound: 2_x000D_ Porosity: N/A_x000D_ Hysteresis: Yes_x000D_ Saturation: 0 - 200 cm3/g_x000D_ Position: (0,0.8,0.5,1)	15	15	TP	TN	TN	TN	TP	TN	Figure 2, A	2	N/A	Yes	0 - 200 cm3/g	(0,0.8,0.5,1)	0	1	1	1	1	1	170	180	680	0.224967	156	1302.1	0.641917	0.88298	XUNVAF	7.15079	6.5153	7.14534	Zn
10.1021/ic501849g	Supporting Information	7	1	0	0	0	0	0	Figures: (1)_x000D_ Nitrogen Isotherm: Figure S8; Figure S9_x000D_ Compound: L-1; L-2_x000D_ Porosity: N/A_x000D_ Hysteresis: Yes_x000D_ Saturation: Figure S8: 80 - 85 cm^3/g; Figure S9: 50 - 55 cm^3/g_x000D_ Position: (0, 0, 1, 0.6)	1	1	TP	TN	TN	TN	TN	TN	Figure S8; Figure S9	L-1; L-2	N/A	Yes	Figure S8 80 - 85 cm3/g; Figure S9 50 - 55 cm3/g	(0, 0, 1, 0.6)	1	1	1	1	1	1	70	90	280	0.112484	157	1690.08	0.520963	1.13022	HOWRUI	6.90703	4.72819	6.90703	Cu
10.1021/ic5021302	Supporting Information	4	1	1	0	0	0	0	Figures: (1);(2)_x000D_ Nitrogen Isotherm: Figure S6_x000D_ Compound: Nd-Co, Er-Co_x000D_ Porosity: N/A_x000D_ Hysteresis: I do not know_x000D_ Saturation: 0.2 - 0.4 mol mol?????_x000D_ Position: (0,0,0.75,0.5)	12	12	TP	TP	TN	TN	TN	TN	Figure S6	Nd-Co, Er-Co	N/A	I do not know	0.2 - 0.4 mol mol	(0,0,0.75,0.5)	1	1	1	1	1	1	0	0	0	0	158	929.837	0.587296	1.03321	ZOZHIH	7.40462	5.14931	5.97305	Ce,Co
10.1021/ic502254c	Main	2	1	0	0	1	1	0	Figures: (1);(4);(5)_x000D_ Nitrogen Isotherm: Figure 2 (a)_x000D_ Compound: IM-17, Tz-In-MOF-4a, MOF-1R, ZIF-8_x000D_ Porosity: BET surface area of 1178 and 781 m^2/g; Langmuir surface area of 1308 and 781 m^2/g; micropore volume of 0.386 cm^3/g; median pore size of 1.58 ??_x000D_ Hysteresis: Yes_x000D_ Saturation: 200 - 250 cm^3/g_x000D_ Position: (0.5, 0.4, 1, 0.7)	145	145	TP	TN	TN	TP	TP	TN	Figure 2 (a)	IM-17, Tz-In-MOF-4a, MOF-1R, ZIF-8	BET surface area of 1178 and 781 m2/g; Langmuir surface area of 1308 and 781 m2/g; micropore volume of 0.386 cm3/g; median pore size of 1.58	Yes	200 - 250 cm3/g	(0.5, 0.4, 1, 0.7)	1	0	1	0	1	1	210	260	840	0.324952	159	1866.25	1.00439	0.711281	YOTHEW	12.6821	7.60887	12.6821	Zn
10.1021/ic502478u	Supporting Information	10	1	0	0	0	1	0	Figures: (1);(5)_x000D_ Nitrogen Isotherm: Figure S3_x000D_ Compound: CALF-30 N2_x000D_ Porosity: N/A_x000D_ Hysteresis: Yes_x000D_ Saturation: 2.5 - 3 mmol/g_x000D_ Position: (0,0.3,1,0.6)_x000D_ _x000D_ Nitrogen Isotherm: Figure S4_x000D_ Compound: CALF-30 H2_x000D_ Porosity: N/A_x000D_ Hysteresis: Yes_x000D_ Saturation: I do not know_x000D_ Position: (0,0.7,1,1)	15	15	TP	TN	TN	TN	TP	TN	Figure S3	CALF-30 N2	N/A	Yes	2.5 - 3 mmol/g	(0,0.3,1,0.6)	1	1	1	1	1	1	10	50	40	0.0624909	160	531.365	0.344256	1.35422	FUFBEP	6.55769	3.80885	6.25374	Cu
10.1021/ic502643m	Supporting Information	26	1	0	0	0	0	0	Figures: (1)_x000D_ Nitrogen Isotherm: Fig. S31; Fig. S32_x000D_ Compound: IIa, IIc_x000D_ Porosity: 276 m^2??g^-1 for IIa and 202 m^2??g^-1 for IIc_x000D_ Hysteresis: Yes_x000D_ Saturation: 60-80 cm^3/g for Fig. S31_x000D_ Position: (0,0,1,0.5) for Fig. S31; (0,0.5,1,1) for Fig. S32.	1	1	TP	TN	TN	TN	TN	TN	Fig. S31; Fig. S32	IIa, IIc	276 m2g-1 for IIa and 202 m2g-1 for IIc	Yes	60-80 cm3/g for Fig. S31	(0,0,1,0.5) for Fig. S31; (0,0.5,1,1) for Fig. S32.	0	1	1	1	1	1	70	80	280	0.0999854	162	2343.2	0.859985	0.819549	PUGSIV	9.70753	8.64872	9.70205	Zn
10.1021/ic502725y	Supporting Information	11	1	0	0	0	0	0	Figures: (1)_x000D_ Nitrogen Isotherm: Figure S6_x000D_ Compound: Th???O???(OH)???(H???O)???(bdc)?????6DMF??12H???O_x000D_ Porosity: N/A_x000D_ Hysteresis: No_x000D_ Saturation: 200 - 250 cm??/g_x000D_ Position: (0,0.15,1,0.95)	1	1	TP	TN	TN	TN	TN	TN	Figure S6	ThO(OH)(HO)(bdc)6DMF12HO	N/A	No	200 - 250 cm/g	(0,0.15,1,0.95)	1	1	1	1	1	1	190	220	760	0.27496	170	2049.09	0.405099	1.57097	POXLIZ	9.62394	4.35849	9.62394	Th
10.1021/ic5028256	Supporting Information	30	1	0	0	0	0	0	Figures: (1)_x000D_ Nitrogen Isotherm: Figure S23; Figure S24; Figure S25_x000D_ Compound: ZIF-8_x000D_ Porosity: BET surface areas amounted to 1795 m^2??g^-1 on the NOVA (Figure S23) and 1815 m^2??g^-1 on the iQ MP (Figure S24). _x000D_ Hysteresis: Yes_x000D_ Saturation: Figure S23: 750 - 1000 cm^3/g, Figure S24: 750 - 1000 cm^3/g, Figure S25: 400 - 600 cm^3/g_x000D_ Position: (0, 0.2, 1, 0.75)	1	1	TP	TN	TN	TN	TN	TN	Figure S23; Figure S24; Figure S25	ZIF-8	BET surface areas amounted to 1795 m2g-1 on the NOVA (Figure S23) and 1815 m2g-1 on the iQ MP (Figure S24).	Yes	Figure S23 750 - 1000 cm3/g, Figure S24 750 - 1000 cm3/g, Figure S25 400 - 600 cm3/g	(0, 0.2, 1, 0.75)	1	1	1	1	1	0	330	400	1320	0.499927	172	1429.44	0.694232	0.933117	OFERUN07	11.3795	3.3255	11.3795	Zn
10.1021/ic502921j	Supporting Information	4	1	0	0	0	1	0	Figures: (1);(5)_x000D_ Nitrogen Isotherm: Figure S7_x000D_ Compound: N/A_x000D_ Porosity: N/A_x000D_ Hysteresis: No_x000D_ Saturation: 300 - 400 cm??/g_x000D_ Position: (0,0,1,0.5)	15	15	TP	TN	TN	TN	TP	TN	Figure S7	N/A	N/A	No	300 - 400 cm/g	(0,0,1,0.5)	1	0	1	1	1	1	300	340	1200	0.424938	173	1844.88	0.656147	1.03513	JUHNIL	10.7997	7.20507	10.7732	Cu
10.1021/ic502921j	Main	4	1	0	0	0	1	0	Figures: (1);(5)_x000D_ Nitrogen Isotherm: Figure 3_x000D_ Compound: N/A_x000D_ Porosity: N/A_x000D_ Saturation: 140 - 160 cm??/g_x000D_ Position: (0.05,0.3,0.55,0.9)	15	15	TP	TN	TN	TN	TP	TN	Figure 3	N/A	N/A	N/A	140 - 160 cm/g	(0.05,0.3,0.55,0.9)	1	1	1	1	0	1			0
10.1021/ic5030058	Main	2	1	0	0	1	0	0	Figures: (1);(4)_x000D_ Nitrogen Isotherm: Figure 2_x000D_ Compound: PCP-33_x000D_ Porosity: N/A_x000D_ Hysteresis: Yes_x000D_ Saturation: 350 - 400 cm^3/g_x000D_ Position: (0,0.6,0.5,1)	14	14	TP	TN	TN	TP	TN	TN	Figure 2	PCP-33	N/A	Yes	350 - 400 cm3/g	(0,0.6,0.5,1)	1	1	1	1	0	1	300	310	1200	0.387443	176	1135.9	0.286279	2.16851	IGULIH	14.0448	6.79741	14.0448	Cu
10.1021/ic7014034	Main	3	1	0	0	0	1	0	Figures: (1);(5)_x000D_ Nitrogen Isotherm: Figure 4, panel (a)_x000D_ Compound: Nitrogen_x000D_ Porosity: N/A_x000D_ Hysteresis: Yes_x000D_ Saturation: 60 - 80 cm^3/g_x000D_ Position: (0, 0, 0.5, 0.55)	15	15	TP	TN	TN	TN	TP	TN	Figure 4, panel (a)	Nitrogen	N/A	Yes	60 - 80 cm3/g	(0, 0, 0.5, 0.55)	1	0	1	1	0	1	0	10	0	0.0124982	178	1965.67	0.657259	0.945137	GIQWEJ	6.72718	4.71693	5.67099	Zn
10.1021/ic9002115	Supporting Information	7	1	0	0	0	0	0	Figures: (1)_x000D_ Nitrogen Isotherm: Yes, present in the displayed figure (a)_x000D_ Compound: N/A_x000D_ Porosity: N/A_x000D_ Hysteresis: Yes_x000D_ Saturation: 120 - 140 cm3/g for the top plot; 100 - 120 cm3/g for the bottom plot_x000D_ Position: (0, 0, 1, 1)	1	1	TP	TN	TN	TN	TN	TN	Yes, present in the displayed figure (a)	N/A	N/A	Yes	120 - 140 cm3/g for the top plot; 100 - 120 cm3/g for the bottom plot	(0, 0, 1, 1)	1	1	1	1	1	1	90	130	360	0.162476	184	982.107	0.379883	1.24196	COWPOU	5.30738	5.07102	5.30738	Zn
10.1021/ic9002115	Supporting Information	8	1	0	0	0	0	0	Figures: (1);(5)_x000D_ Nitrogen Isotherm: Figure S10 (a)_x000D_ Compound: 1'_x000D_ Porosity: N/A_x000D_ Hysteresis: Yes_x000D_ Saturation: 80 - 100 cm3/g_x000D_ Position: (0, 0, 1, 0.5)	1	15	TP	TN	TN	TN	FP	TN	Figure S10 (a)	1	N/A	Yes	80 - 100 cm3/g	(0, 0, 1, 0.5)	1	1	1	1	1	1
[truncated: 162 more rows]

## Sheet: legend
Term	Defintion
Nitrogen Isotherm	Specific figure number (e.g. Fig. S1) or indication of the Nitrogen Isotherm mentioned in the document.
Compound	The name of the MOF compound reported in the plot.
Porosity	Information on BET surface area and porosity, if applicable, reported or discussed in the given page.
[truncated: 17 more rows]
